# Supplementary material for: Approaches to the total synthesis of chaetochalasin A
Source: Royal Society of Chemistry journal article supplement (doi:10.1039/c4ob01308e), 2014-01-01

## **Approaches to the total synthesis of chaetochalasin A**

Eric J. Thomas\*<sup>a</sup> and Mark Willis<sup>a</sup>

Supplementary data – <sup>1</sup>H and <sup>13</sup>C NMR spectra of key compounds.

|                        |                      |                        |                                                                     |                      |                      |
|------------------------|----------------------|------------------------|---------------------------------------------------------------------|----------------------|----------------------|
| Acquisition Time (sec) | 3.9649               | Comment                | MWB092pp mPROTON CDCl3 {e:\bruk400data\2009\Aug} ejt 48             | Date                 | 03 Aug 2009 13:20:00 |
| Date Stamp             | 03 Aug 2009 13:20:00 | File Name              | I:\Chemistry\NMR\Year 1\Data\Compound21\MWB092pp\MWB092pp_000000fid |                      |                      |
| Frequency (MHz)        | 400.13               | Nucleus                | 1H                                                                  | Number of Transients | 16                   |
| Original Points Count  | 32768                | Owner                  | Administrator                                                       | Points Count         | 32768                |
| Receiver Gain          | 64.00                | SW(cyclical) (Hz)      | 8264.46                                                             | Pulse Sequence       | zg30b                |
| Sweep Width (Hz)       | 8264.21              | Temperature (degree C) | 20.200                                                              | Solvent              | CHLOROFORM-d         |
|                        |                      |                        |                                                                     | Spectrum Offset (Hz) | 2465.1973            |

Compound21pp.esp

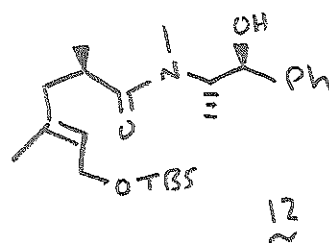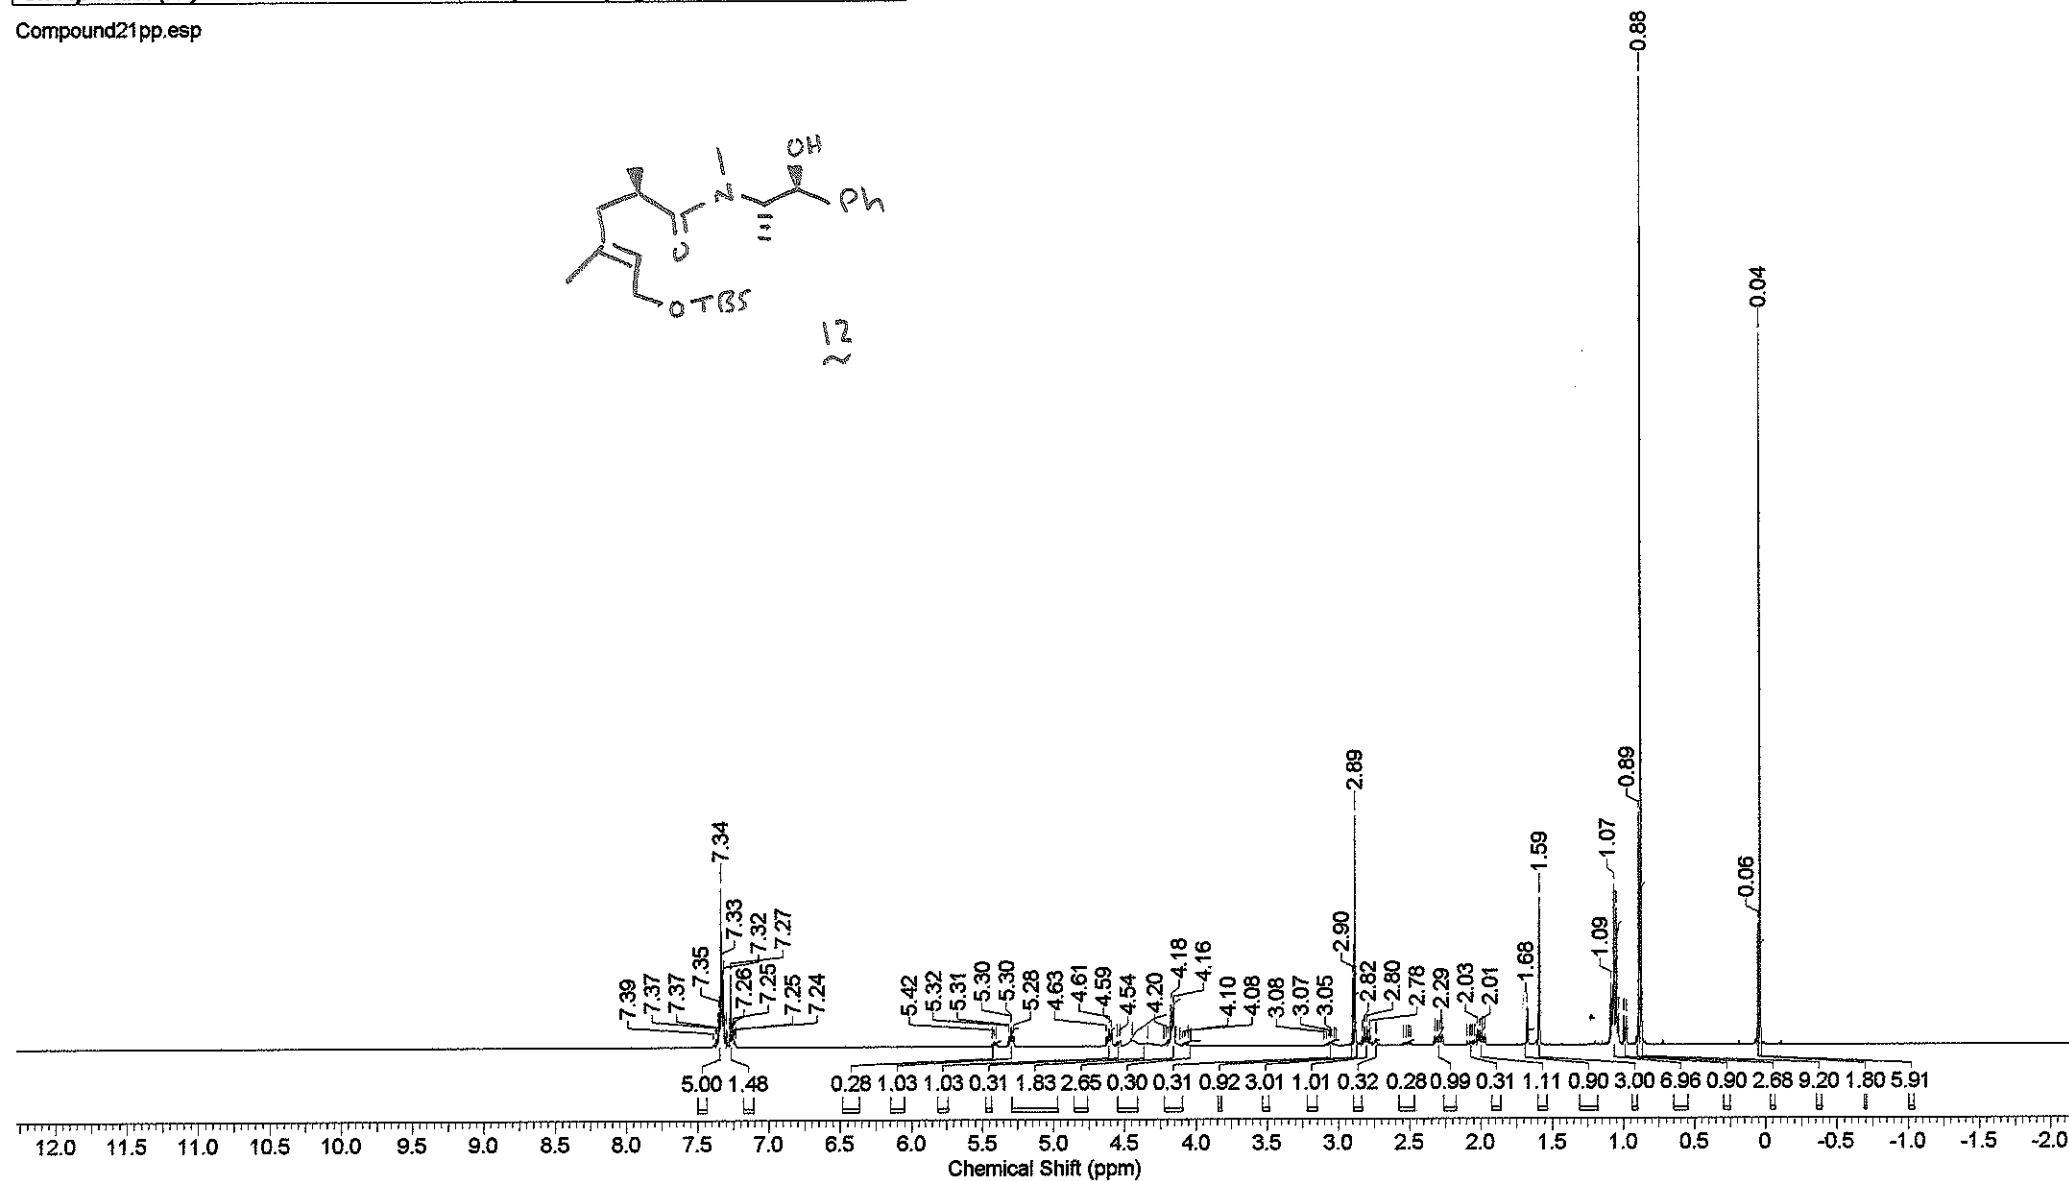

|                        |                      |                        |                                                          |                      |                      |
|------------------------|----------------------|------------------------|----------------------------------------------------------|----------------------|----------------------|
| Acquisition Time (sec) | 1.0835               | Comment                | MWB092pc mCARBON CDCl3 {e:\bruk400\data\2009\Aug} ejt 49 | Date                 | 03 Aug 2009 13:45:36 |
| Date Stamp             | 03 Aug 2009 13:45:36 | File Name              | I:\Chemistry\NMR\Year 1\Data\Compound21\MWB092pc_000001r |                      |                      |
| Frequency (MHz)        | 100.61               | Nucleus                | 13C                                                      | Number of Transients | 256                  |
| Original Points Count  | 32768                | Owner                  | Administrator                                            | Points Count         | 32768                |
| Receiver Gain          | 512.00               | SW(cyclical) (Hz)      | 30241.94                                                 | Solvent              | CHLOROFORM-d         |
| Sweep Width (Hz)       | 30241.01             | Temperature (degree C) | 20.900                                                   | Spectrum Offset (Hz) | 11320.2314           |

Compound21pc.esp

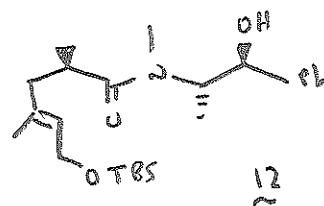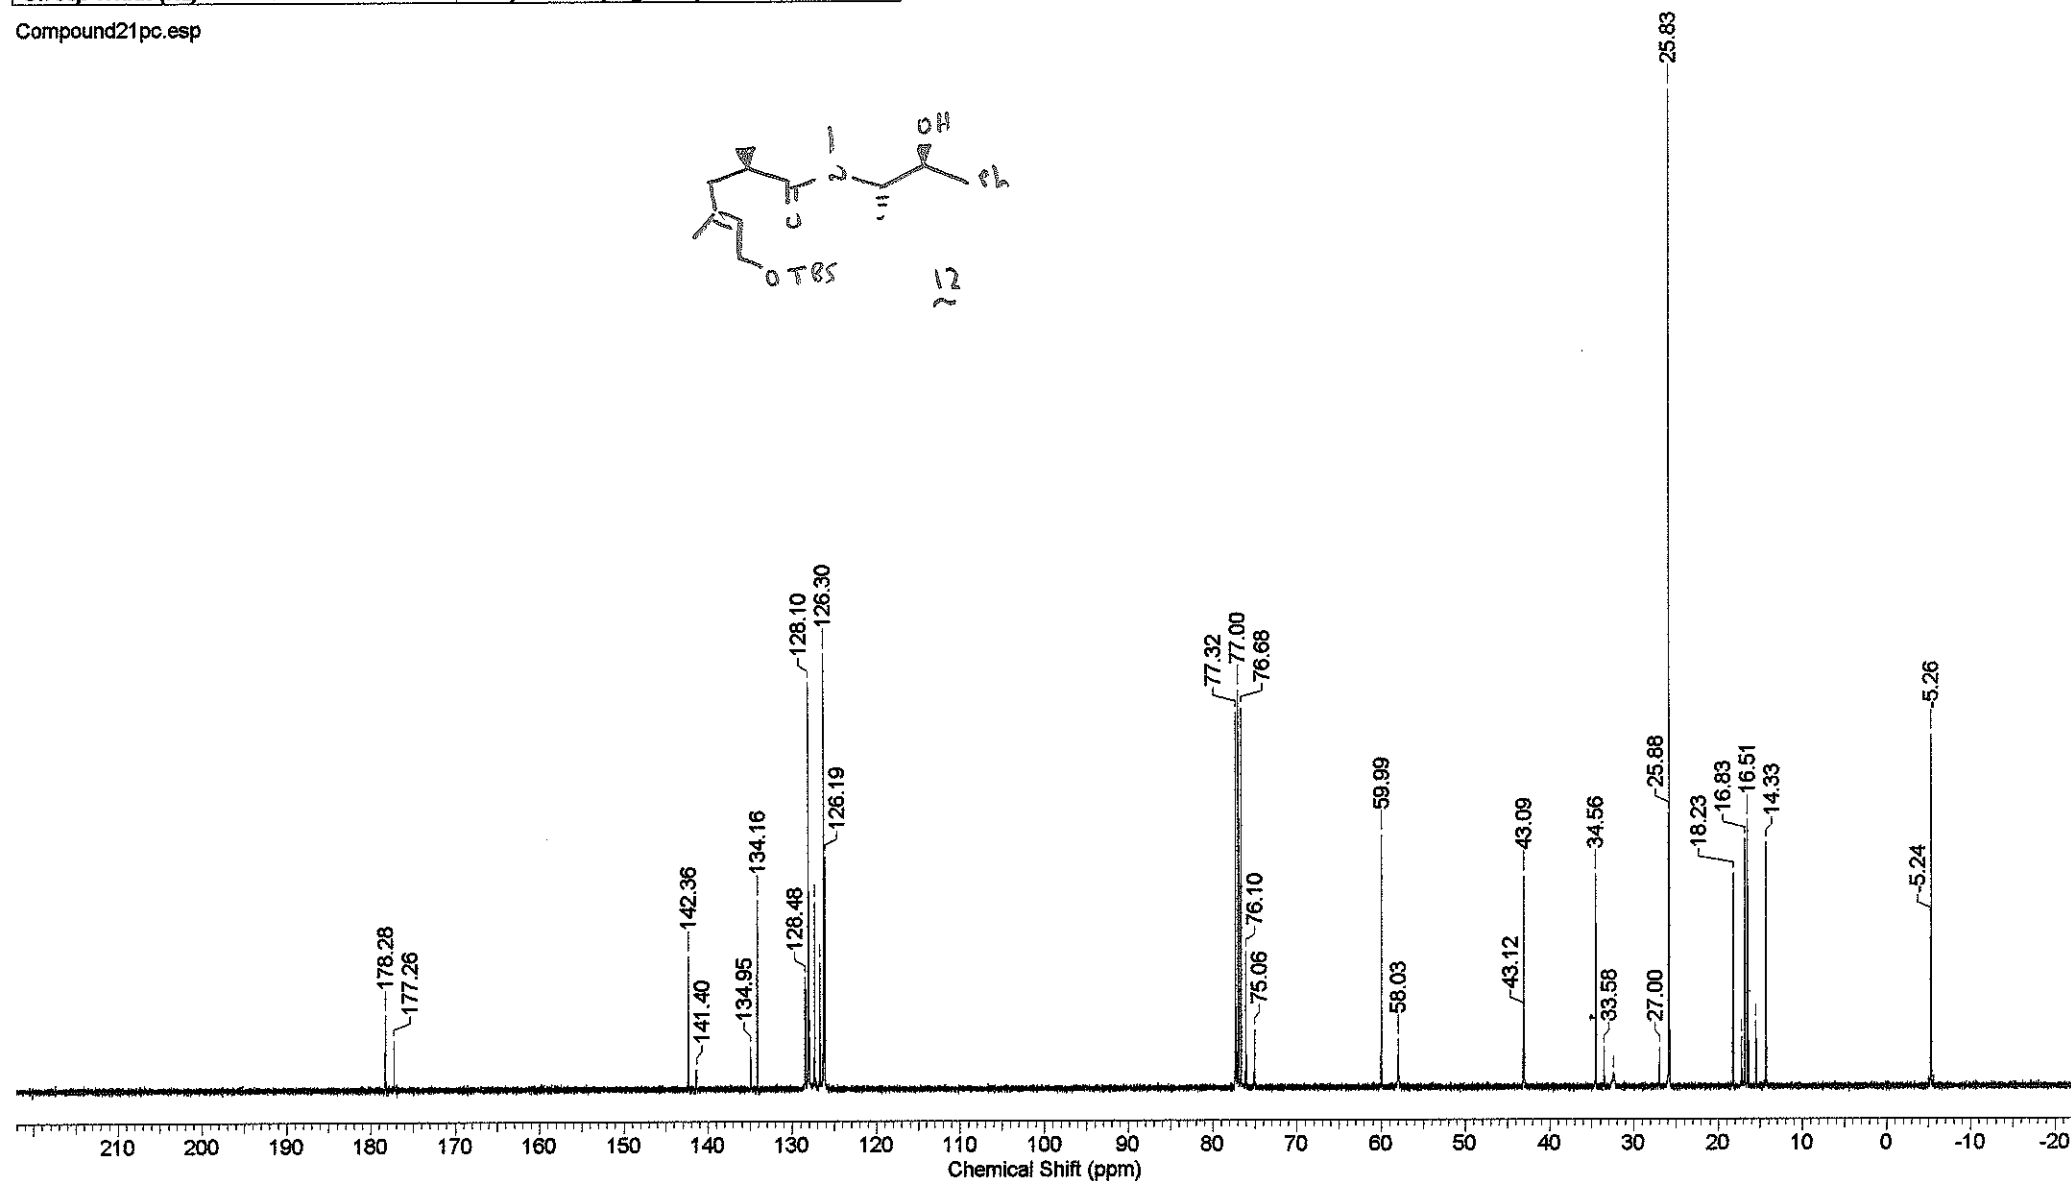

|                               |                      |                               |                                                                        |                             |                      |
|-------------------------------|----------------------|-------------------------------|------------------------------------------------------------------------|-----------------------------|----------------------|
| <b>Acquisition Time (sec)</b> | 3.9649               | <b>Comment</b>                | MWB036pp mPROTON CDC13 {e:\bruk400data\2009\Apr} ejt 15                | <b>Date</b>                 | 15 Apr 2009 07:21:36 |
| <b>Date Stamp</b>             | 15 Apr 2009 07:21:36 | <b>File Name</b>              | C:\Users\Mark\Documents\Chemistry\NMR\Data\MWB036pp\MWB036pp_000000fid |                             |                      |
| <b>Frequency (MHz)</b>        | 400.13               | <b>Nucleus</b>                | 1H                                                                     | <b>Number of Transients</b> | 16                   |
| <b>Original Points Count</b>  | 32768                | <b>Owner</b>                  | Administrator                                                          | <b>Points Count</b>         | 32768                |
| <b>Receiver Gain</b>          | 101.00               | <b>SW(cyclical) (Hz)</b>      | 8264.46                                                                | <b>Pulse Sequence</b>       | zg30b                |
| <b>Sweep Width (Hz)</b>       | 8264.21              | <b>Temperature (degree C)</b> | 22.000                                                                 | <b>Solvent</b>              | CHLOROFORM-d         |
|                               |                      |                               |                                                                        | <b>Spectrum Offset (Hz)</b> | 2464.9451            |

Compound23pp.esp

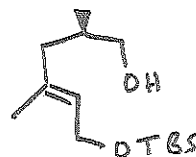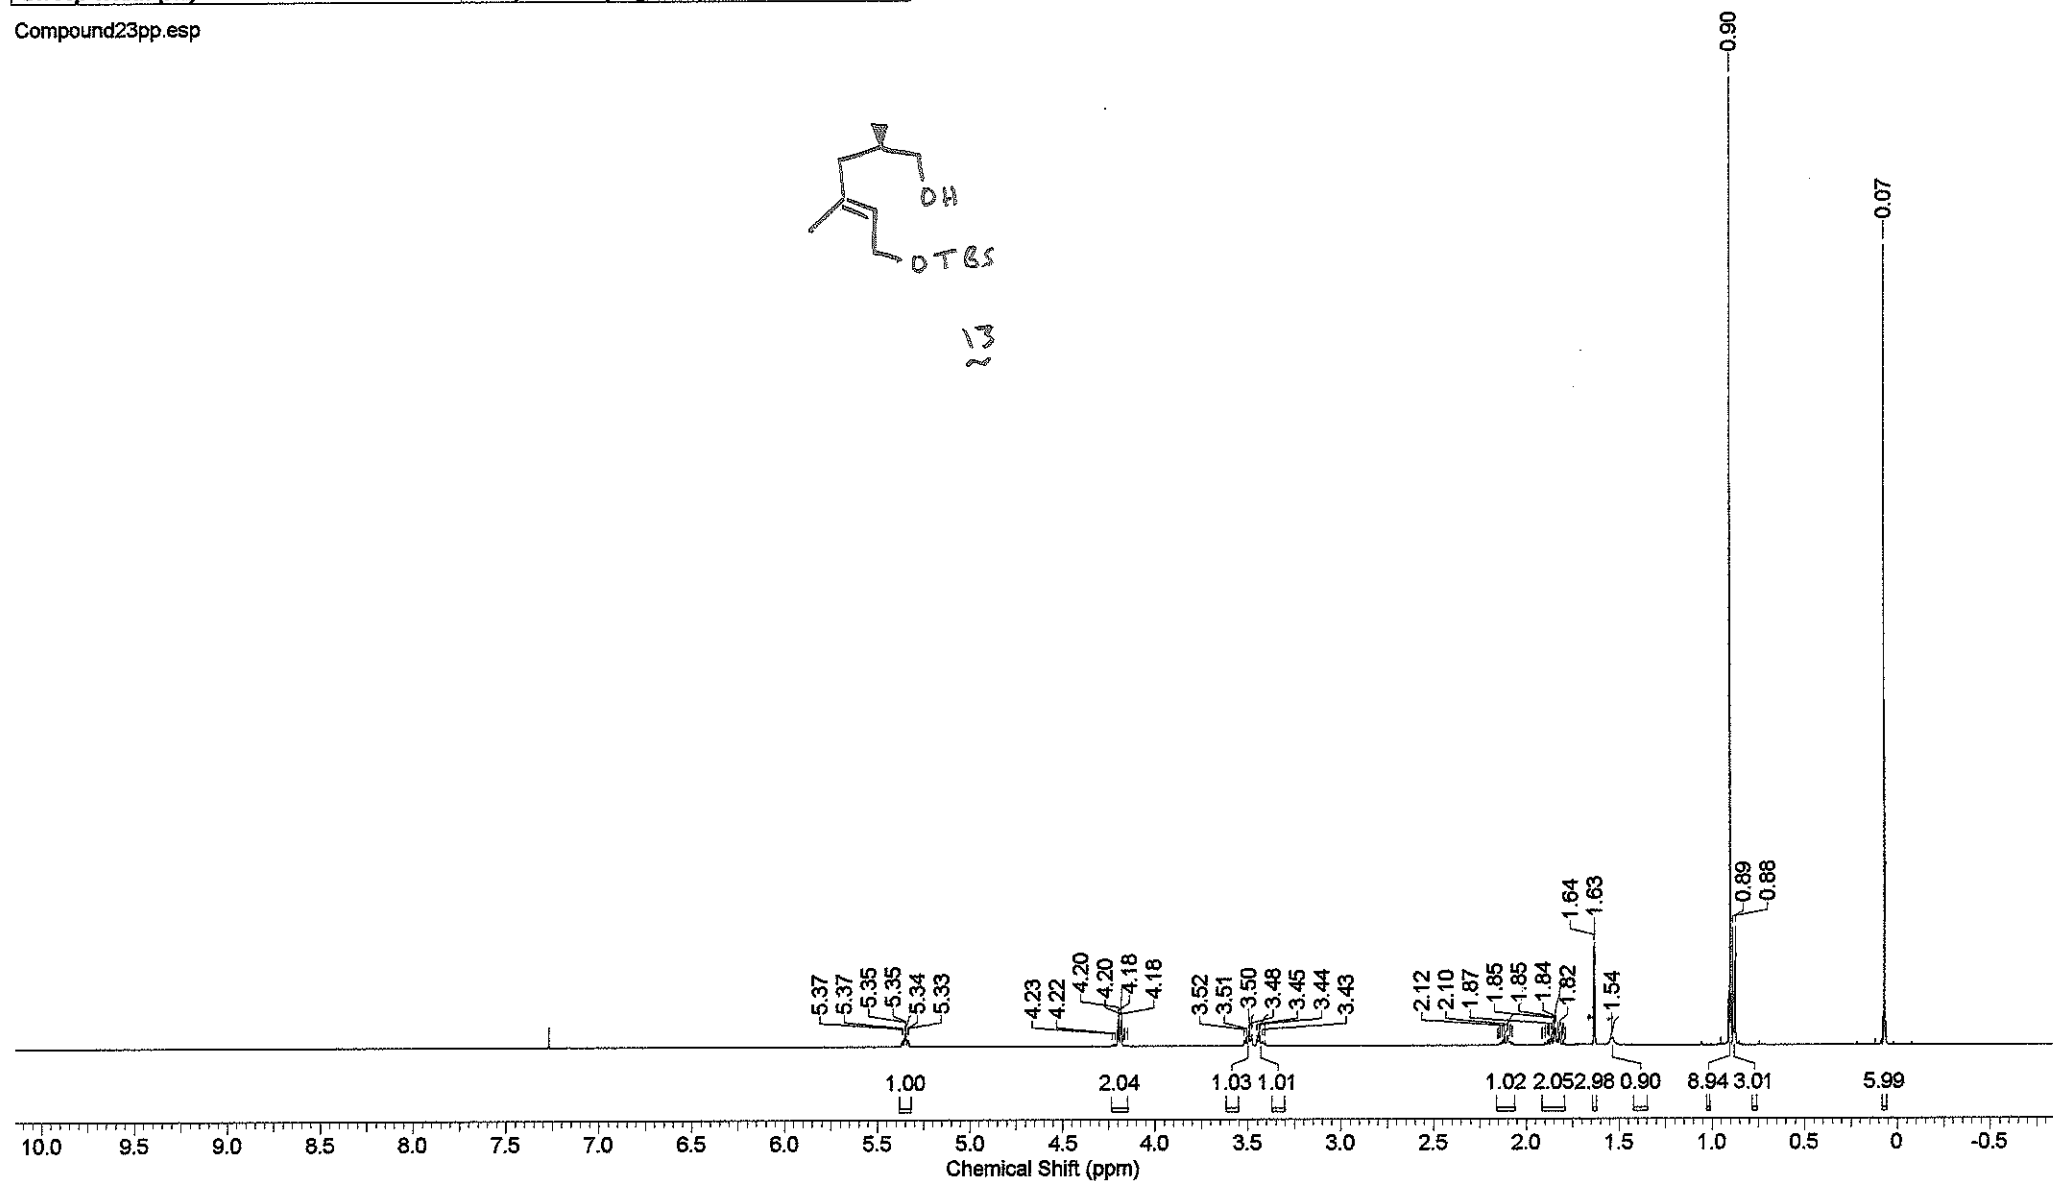

|                        |                      |                        |                                                             |                      |                      |
|------------------------|----------------------|------------------------|-------------------------------------------------------------|----------------------|----------------------|
| Acquisition Time (sec) | 1.0835               | Comment                | MWB036pc mCARBON CDC13 {e:\bruk400data\2009\Apr} ejt 15     | Date                 | 15 Apr 2009 07:45:04 |
| Date Stamp             | 15 Apr 2009 07:45:04 | File Name              | C:\Users\Mark\Documents\Chemistry\NMR\Data\MWB036pc_000001r |                      |                      |
| Frequency (MHz)        | 100.61               | Nucleus                | 13C                                                         | Number of Transients | 256                  |
| Original Points Count  | 32768                | Owner                  | Administrator                                               | Points Count         | 32768                |
| Receiver Gain          | 512.00               | SW(cyclical) (Hz)      | 30241.94                                                    | Solvent              | CHLOROFORM-d         |
| Sweep Width (Hz)       | 30241.01             | Temperature (degree C) | 22.400                                                      | Pulse Sequence       | zgpg30               |
|                        |                      |                        |                                                             | Spectrum Offset (Hz) | 11332.2295           |

Compound23pc.esp

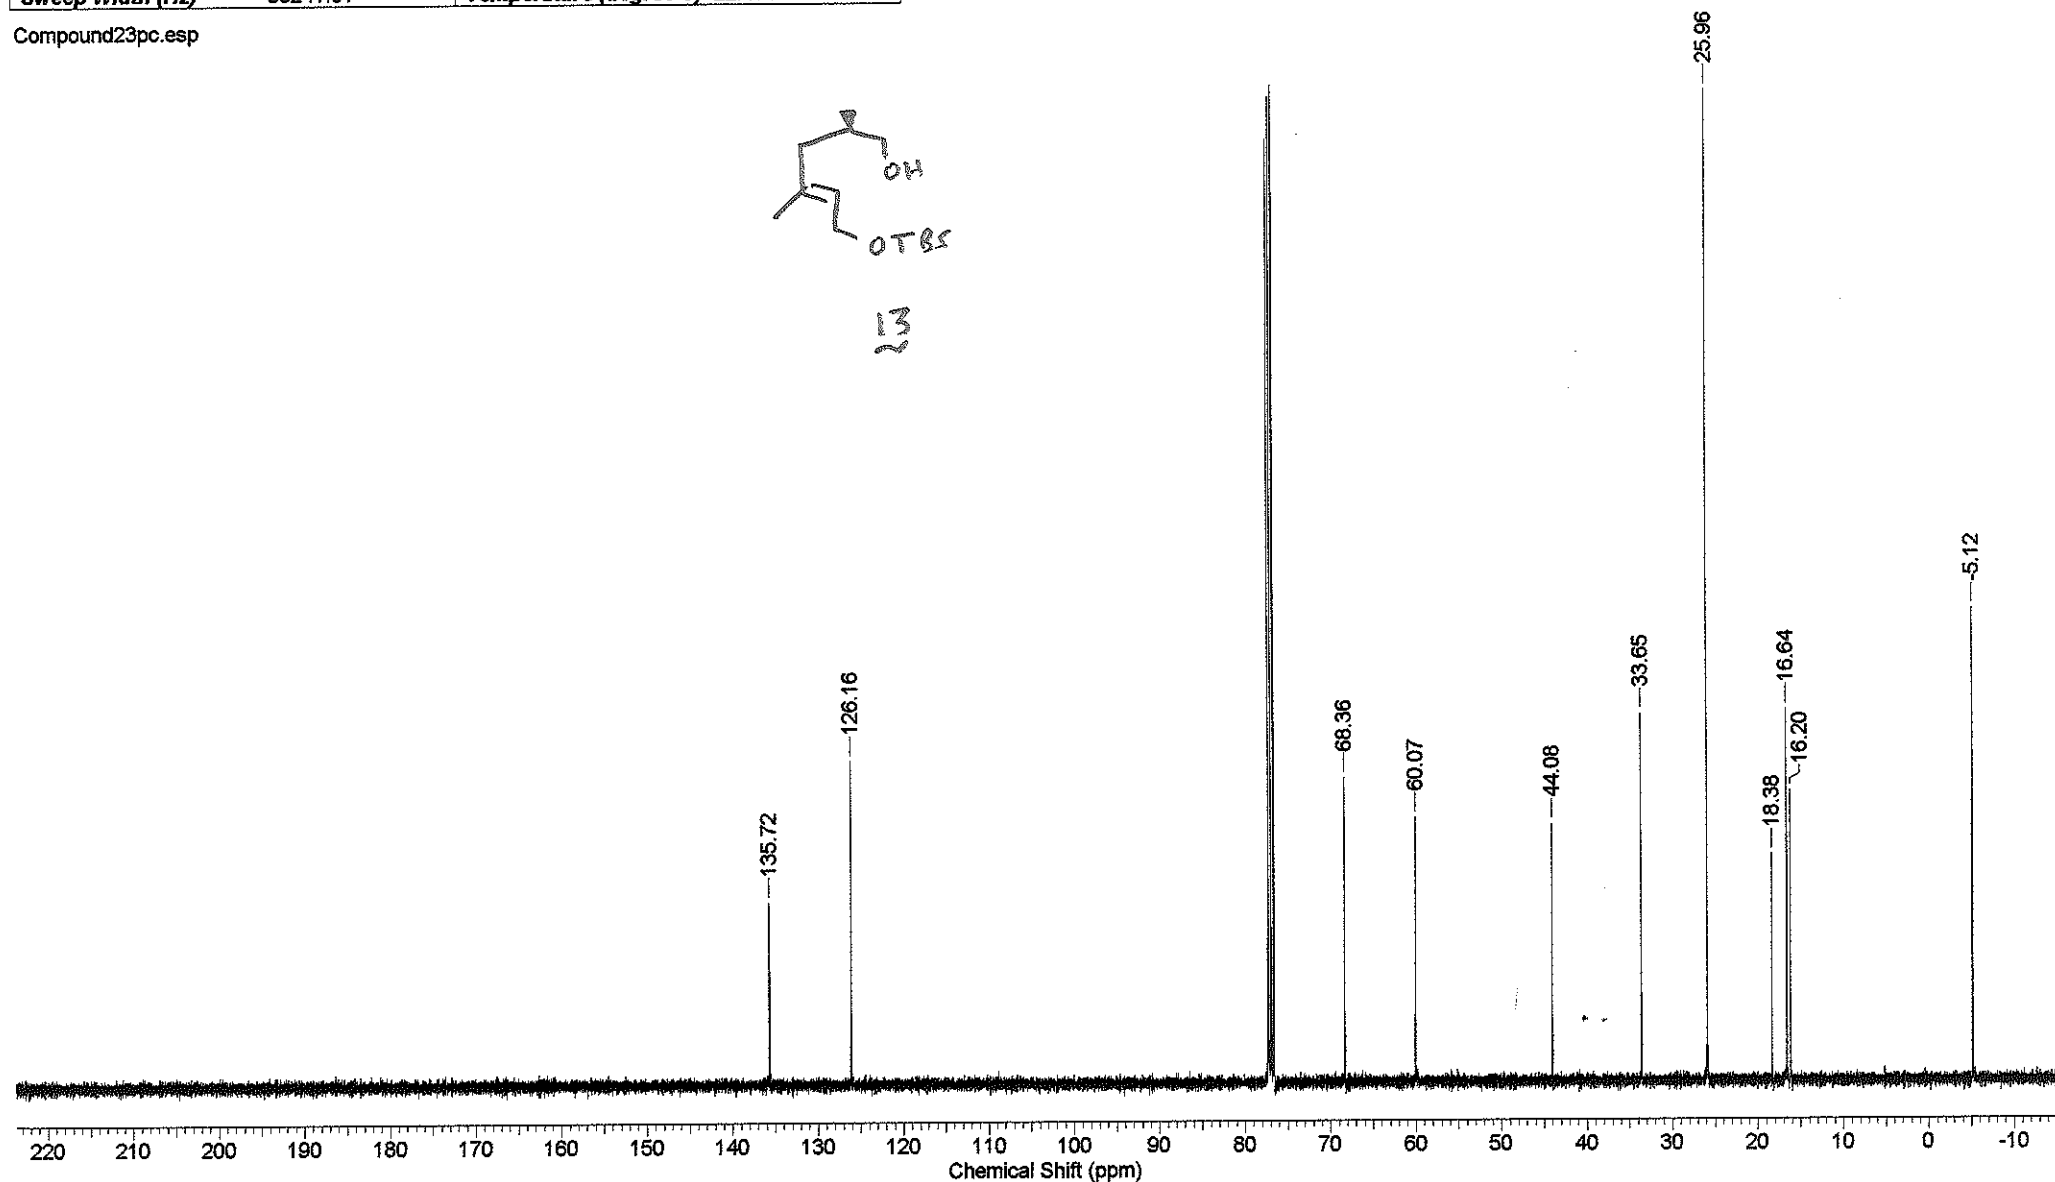

|                        |                      |                        |                                                                        |                      |                      |
|------------------------|----------------------|------------------------|------------------------------------------------------------------------|----------------------|----------------------|
| Acquisition Time (sec) | 3.9649               | Comment                | MWB041pp mPROTON CDCl3 {e:\bruk400data\2009\Apr} ejt 18                | Date                 | 17 Apr 2009 07:28:00 |
| Date Stamp             | 17 Apr 2009 07:28:00 | File Name              | C:\Users\Mark\Documents\Chemistry\NMR\Data\MWB041pp\MWB041pp_000000fid |                      |                      |
| Frequency (MHz)        | 400.13               | Nucleus                | 1H                                                                     | Number of Transients | 16                   |
| Original Points Count  | 32768                | Owner                  | Administrator                                                          | Points Count         | 32768                |
| Receiver Gain          | 161.00               | SW(cyclical) (Hz)      | 8264.46                                                                | Pulse Sequence       | zg30b                |
| Sweep Width (Hz)       | 8264.21              | Temperature (degree C) | 20.200                                                                 | Solvent              | CHLOROFORM-d         |
|                        |                      |                        |                                                                        | Spectrum Offset (Hz) | 2464.9451            |

Compound25pp.esp

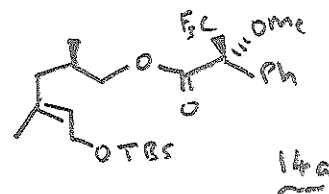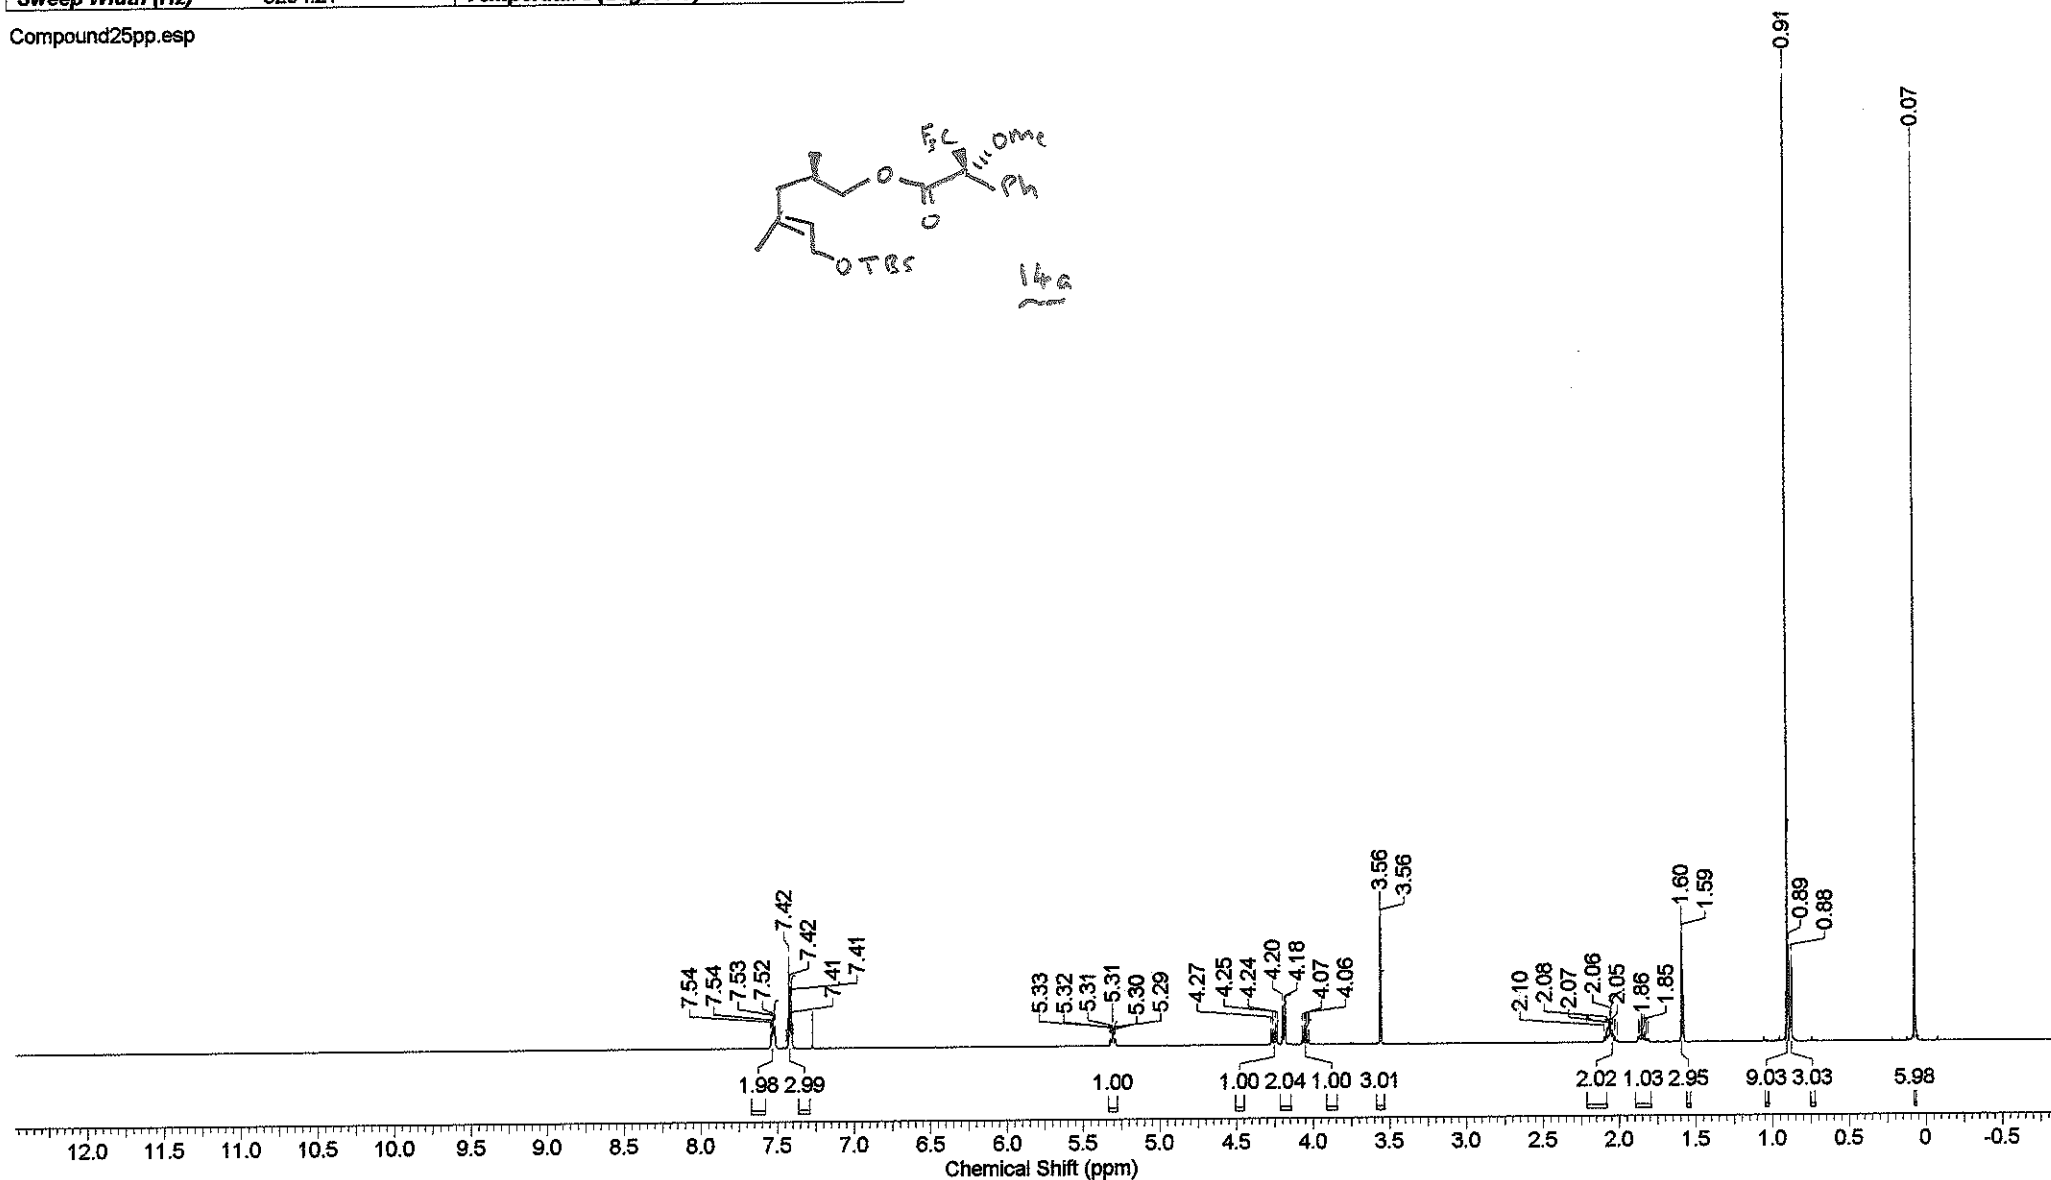

|                               |                                                             |                             |                                                                          |                             |            |
|-------------------------------|-------------------------------------------------------------|-----------------------------|--------------------------------------------------------------------------|-----------------------------|------------|
| <b>Acquisition Time (sec)</b> | 1.0835                                                      | <b>Comment</b>              | MWB041pc mCARBONnight CDCl <sub>3</sub> {e:\bruk400data\2009\May} ejt 28 |                             |            |
| <b>Date</b>                   | 12 May 2009 23:55:44                                        | <b>Date Stamp</b>           | 12 May 2009 23:55:44                                                     |                             |            |
| <b>File Name</b>              | C:\Users\Mark\Documents\Chemistry\NMR\Data\MWB041pc_000001r | <b>Frequency (MHz)</b>      | 100.61                                                                   |                             |            |
| <b>Nucleus</b>                | <sup>13</sup> C                                             | <b>Number of Transients</b> | 1024                                                                     | <b>Origin</b>               | AV400      |
| <b>Owner</b>                  | Administrator                                               | <b>Points Count</b>         | 32768                                                                    | <b>Pulse Sequence</b>       | zgpg30     |
| <b>SW(cyclical) (Hz)</b>      | 30241.94                                                    | <b>Solvent</b>              | CHLOROFORM-d                                                             | <b>Spectrum Offset (Hz)</b> | 11333.1611 |
| <b>Temperature (degree C)</b> | 21.800                                                      | <b>Sweep Width (Hz)</b>     | 30241.01                                                                 |                             |            |

Compound25pc.esp

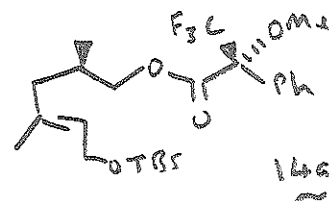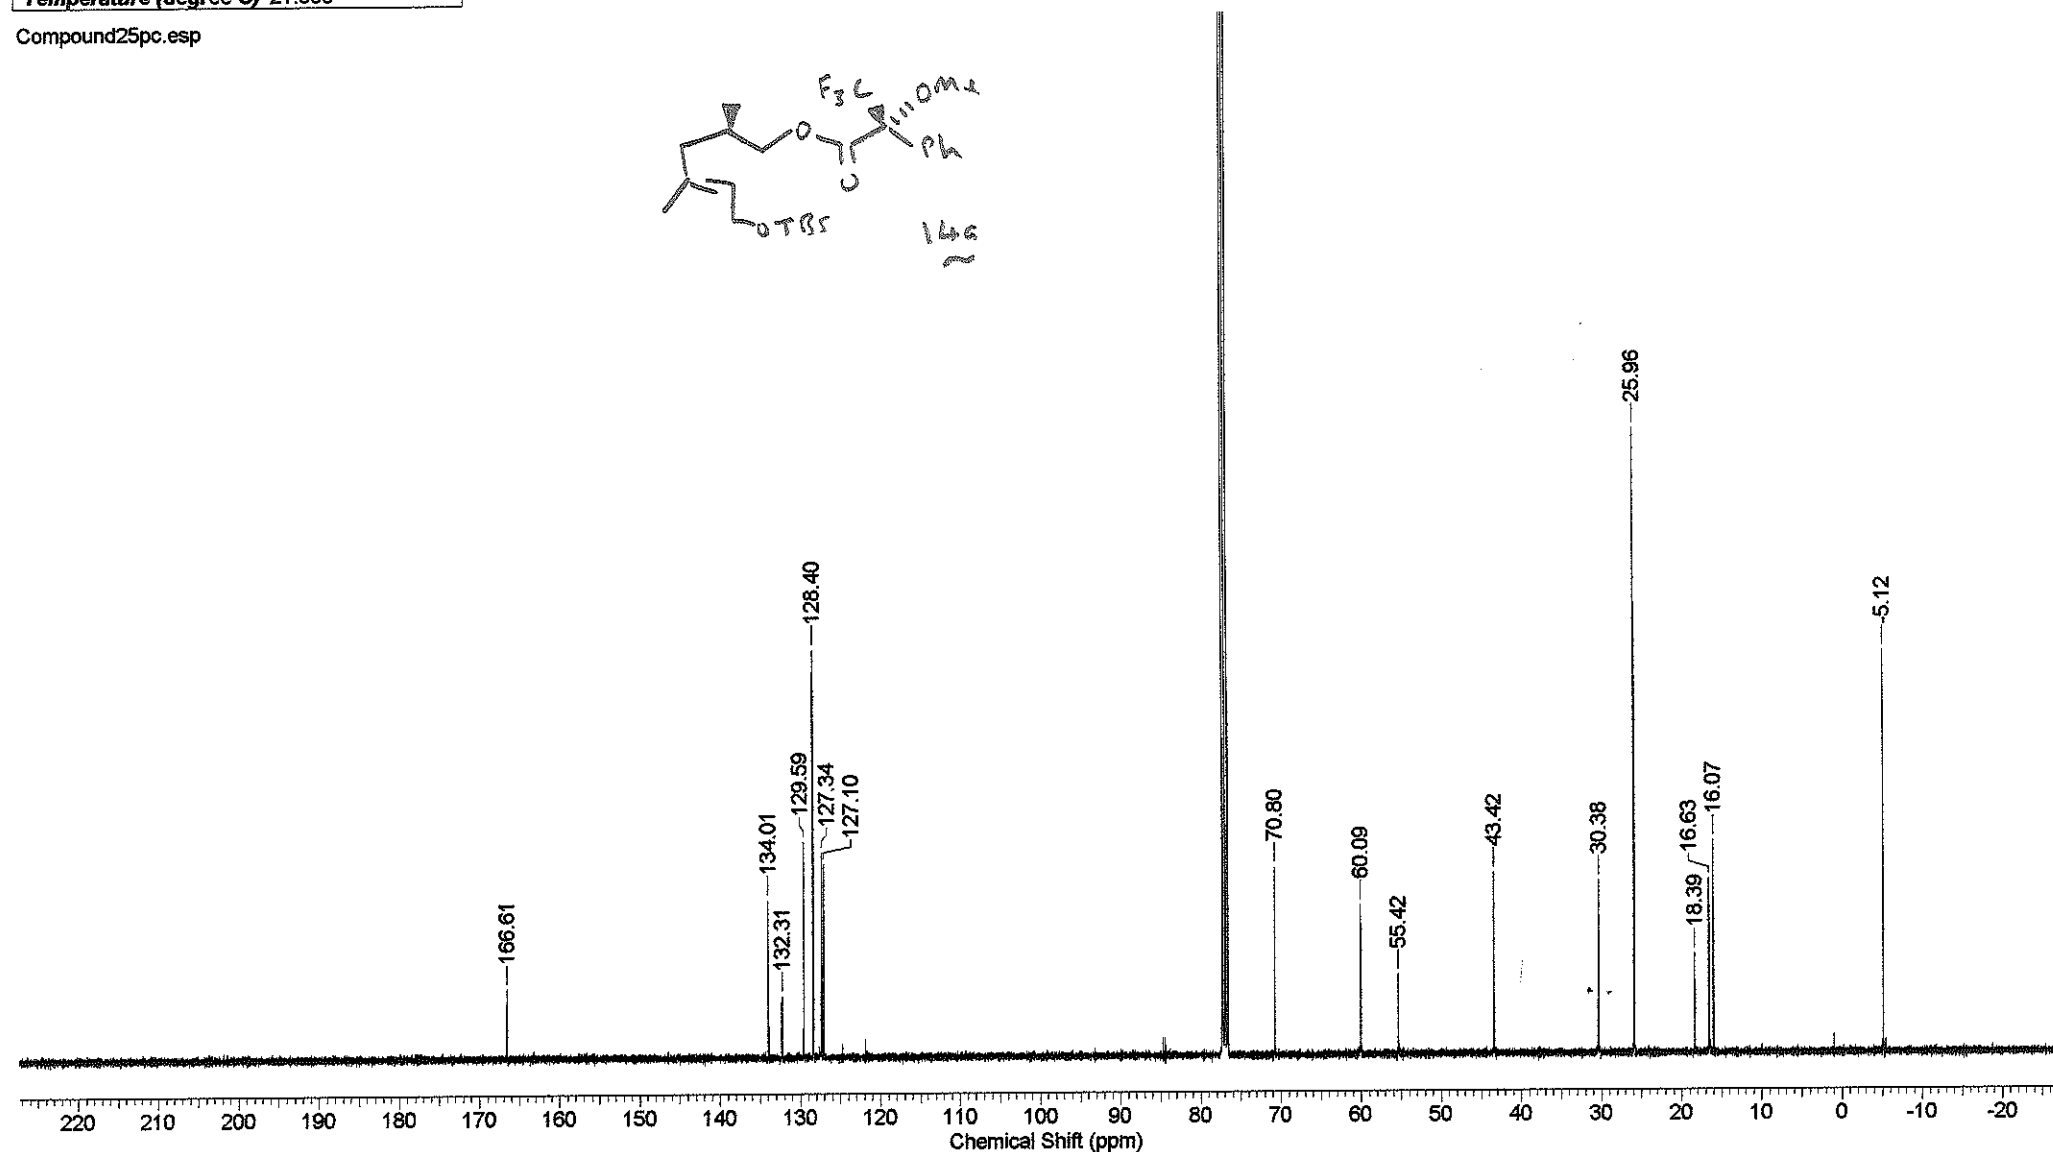

6:30:35

|                               |                      |                               |                                                           |                                                                        |              |                             |           |
|-------------------------------|----------------------|-------------------------------|-----------------------------------------------------------|------------------------------------------------------------------------|--------------|-----------------------------|-----------|
| <b>Acquisition Time (sec)</b> | 3.9649               | <b>Comment</b>                | MWB040pp mPROTON CDCI3 {e:\bruk400\data\2009\Apr\} ejt 23 |                                                                        | <b>Date</b>  | 16 Apr 2009 14:36:48        |           |
| <b>Date Stamp</b>             | 16 Apr 2009 14:36:48 |                               | <b>File Name</b>                                          | C:\Users\Mark\Documents\Chemistry\NMR\Data\MWB040pp\MWB040pp_000000fid |              |                             |           |
| <b>Frequency (MHz)</b>        | 400.13               | <b>Nucleus</b>                | 1H                                                        | <b>Number of Transients</b>                                            | 16           | <b>Origin</b>               | AV400     |
| <b>Original Points Count</b>  | 32768                | <b>Owner</b>                  | Administrator                                             | <b>Points Count</b>                                                    | 32768        | <b>Pulse Sequence</b>       | zg30b     |
| <b>Receiver Gain</b>          | 203.00               | <b>SW(cyclical) (Hz)</b>      | 8264.46                                                   | <b>Solvent</b>                                                         | CHLOROFORM-d | <b>Spectrum Offset (Hz)</b> | 2464.9451 |
| <b>Sweep Width (Hz)</b>       | 8264.21              | <b>Temperature (degree C)</b> | 20.900                                                    |                                                                        |              |                             |           |

Compound24pp.esp

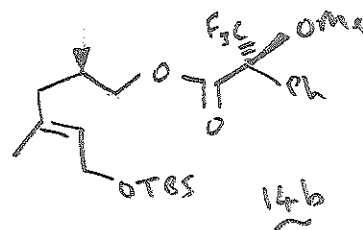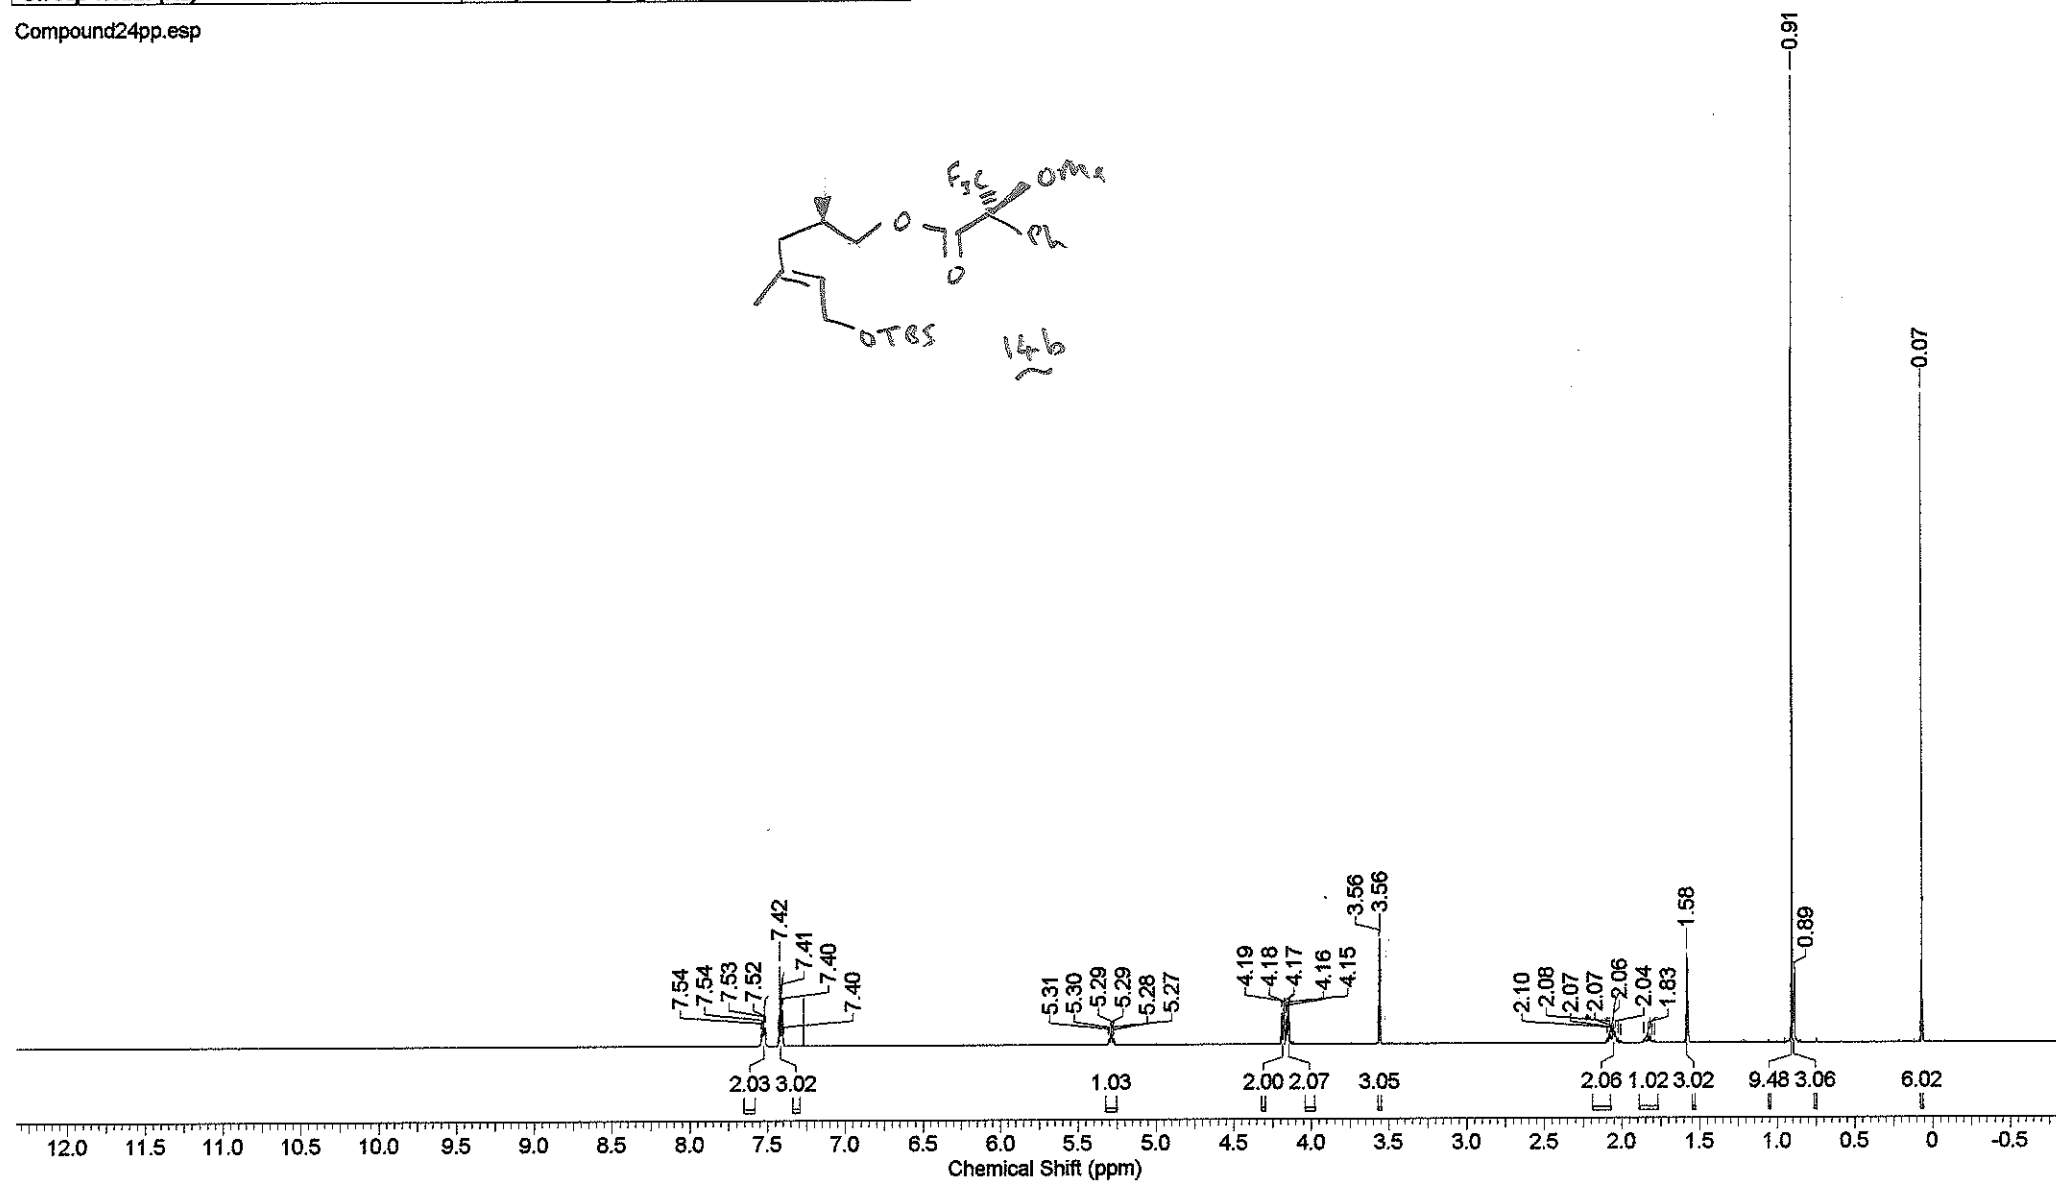



|                               |                      |                               |                                                             |                             |                      |
|-------------------------------|----------------------|-------------------------------|-------------------------------------------------------------|-----------------------------|----------------------|
| <b>Acquisition Time (sec)</b> | 1.0835               | <b>Comment</b>                | MWB040pc mCARBON CDCl3 {e:\bruk400data\2009\Apr} ejt 14     | <b>Date</b>                 | 16 Apr 2009 13:41:20 |
| <b>Date Stamp</b>             | 16 Apr 2009 13:41:20 | <b>File Name</b>              | C:\Users\Mark\Documents\Chemistry\NMR\Data\MWB040pc_000001r |                             |                      |
| <b>Frequency (MHz)</b>        | 100.61               | <b>Nucleus</b>                | 13C                                                         | <b>Number of Transients</b> | 256                  |
| <b>Original Points Count</b>  | 32768                | <b>Owner</b>                  | Administrator                                               | <b>Points Count</b>         | 32768                |
| <b>Receiver Gain</b>          | 512.00               | <b>SW(cyclical) (Hz)</b>      | 30241.94                                                    | <b>Solvent</b>              | CHLOROFORM-d         |
| <b>Sweep Width (Hz)</b>       | 30241.01             | <b>Temperature (degree C)</b> | 21.500                                                      | <b>Pulse Sequence</b>       | zgpg30               |
|                               |                      |                               |                                                             | <b>Spectrum Offset (Hz)</b> | 11333.1523           |

Compound24pc.esp

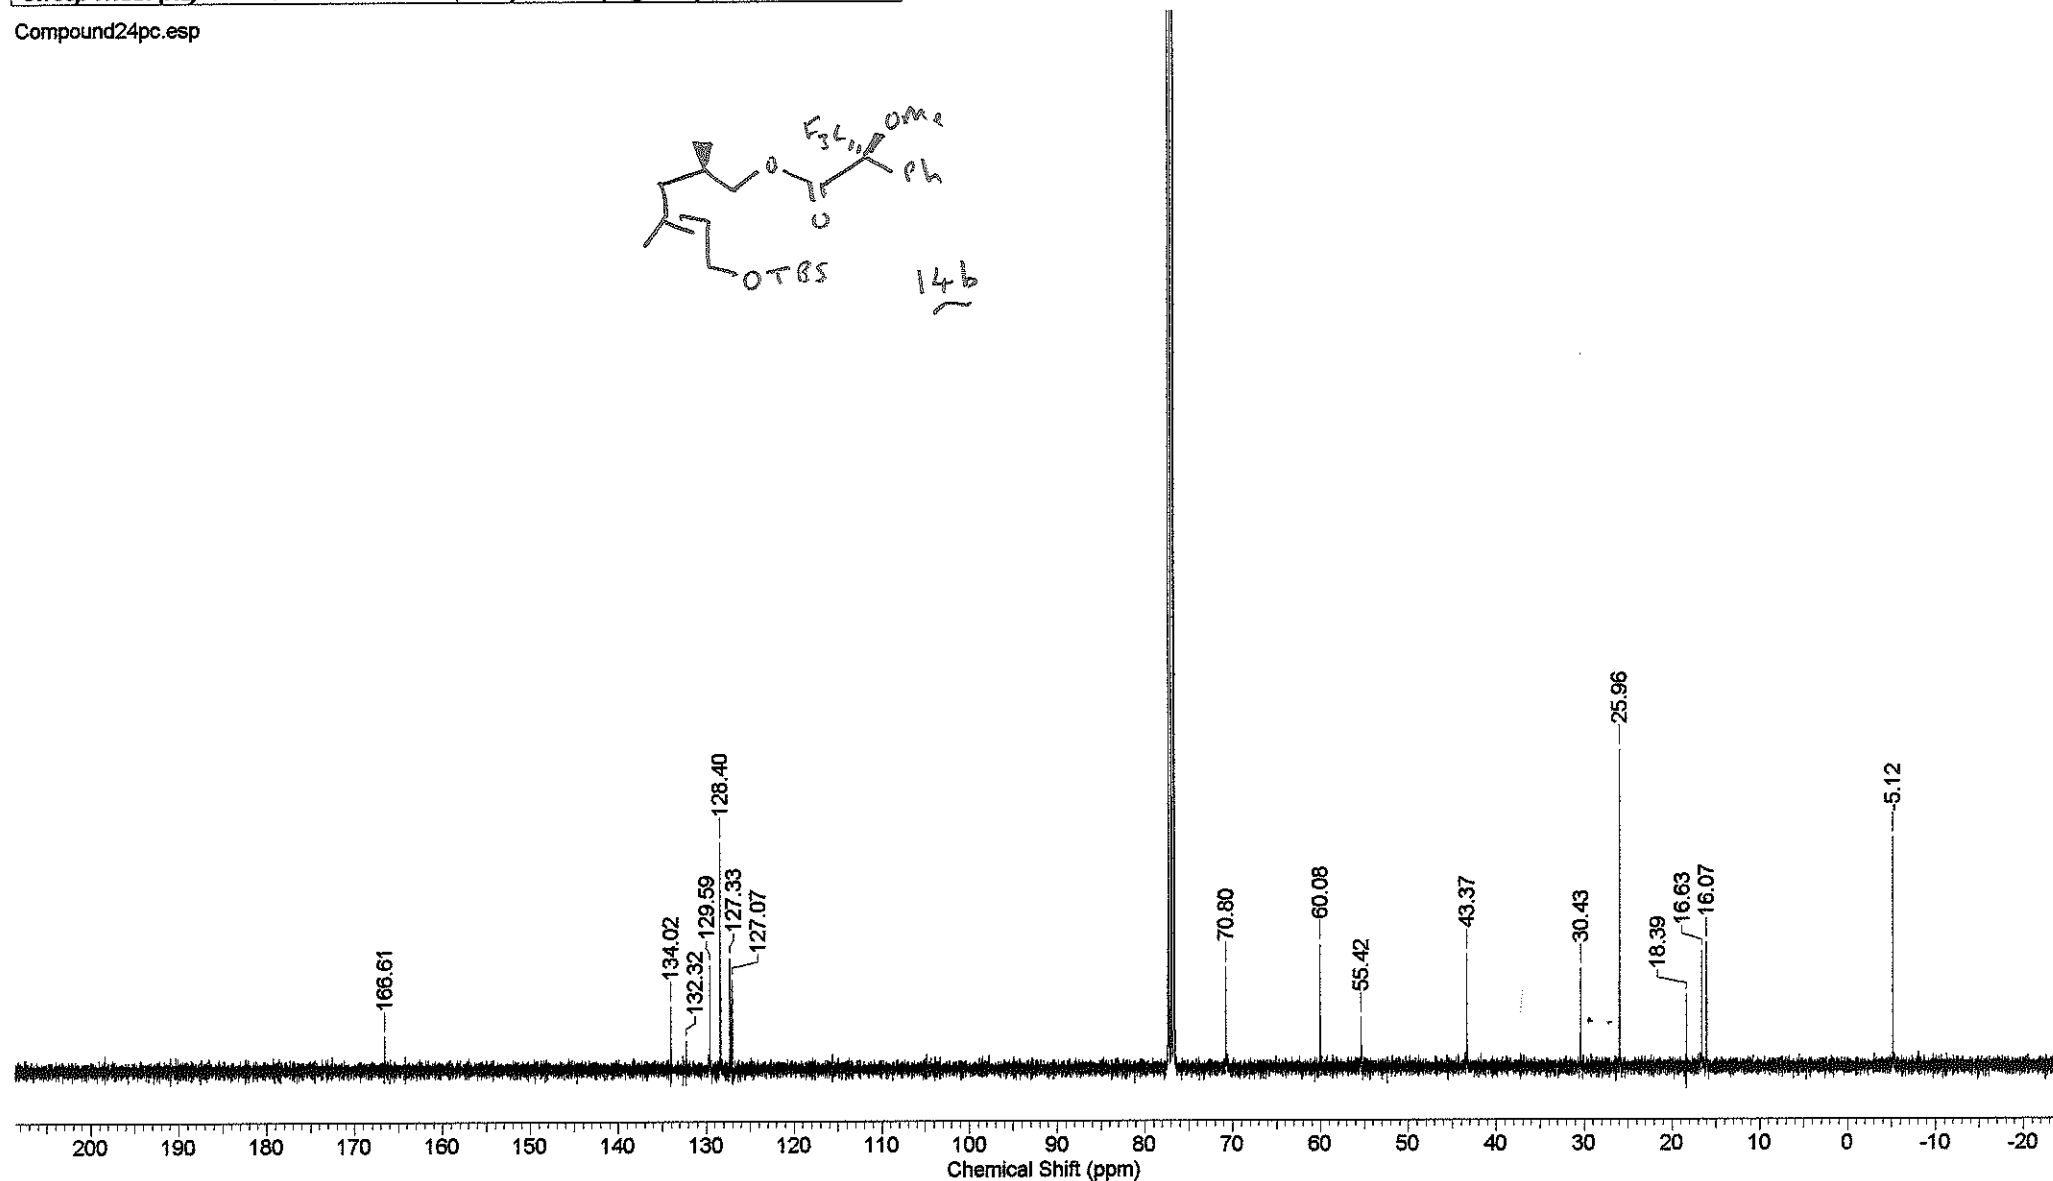

|                               |                      |                               |                                                                        |                             |                      |
|-------------------------------|----------------------|-------------------------------|------------------------------------------------------------------------|-----------------------------|----------------------|
| <b>Acquisition Time (sec)</b> | 3.9649               | <b>Comment</b>                | MWB048pp mPROTON CDCl3 {e:\bruk400\data\2009\Apr} ejt 21               | <b>Date</b>                 | 27 Apr 2009 08:08:32 |
| <b>Date Stamp</b>             | 27 Apr 2009 08:08:32 | <b>File Name</b>              | C:\Users\Mark\Documents\Chemistry\NMR\Data\MWB048pp\MWB048pp_000000fid |                             |                      |
| <b>Frequency (MHz)</b>        | 400.13               | <b>Nucleus</b>                | <sup>1</sup> H                                                         | <b>Number of Transients</b> | 16                   |
| <b>Original Points Count</b>  | 32768                | <b>Owner</b>                  | Administrator                                                          | <b>Points Count</b>         | 32768                |
| <b>Receiver Gain</b>          | 101.00               | <b>SW(cyclical) (Hz)</b>      | 8264.46                                                                | <b>Pulse Sequence</b>       | zg30b                |
| <b>Sweep Width (Hz)</b>       | 8264.21              | <b>Temperature (degree C)</b> | 22.000                                                                 | <b>Solvent</b>              | CHLOROFORM-d         |
|                               |                      |                               |                                                                        | <b>Spectrum Offset (Hz)</b> | 2464.9451            |

Compound26pp.esp

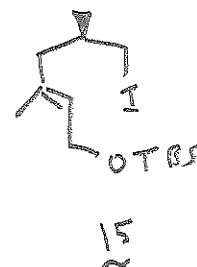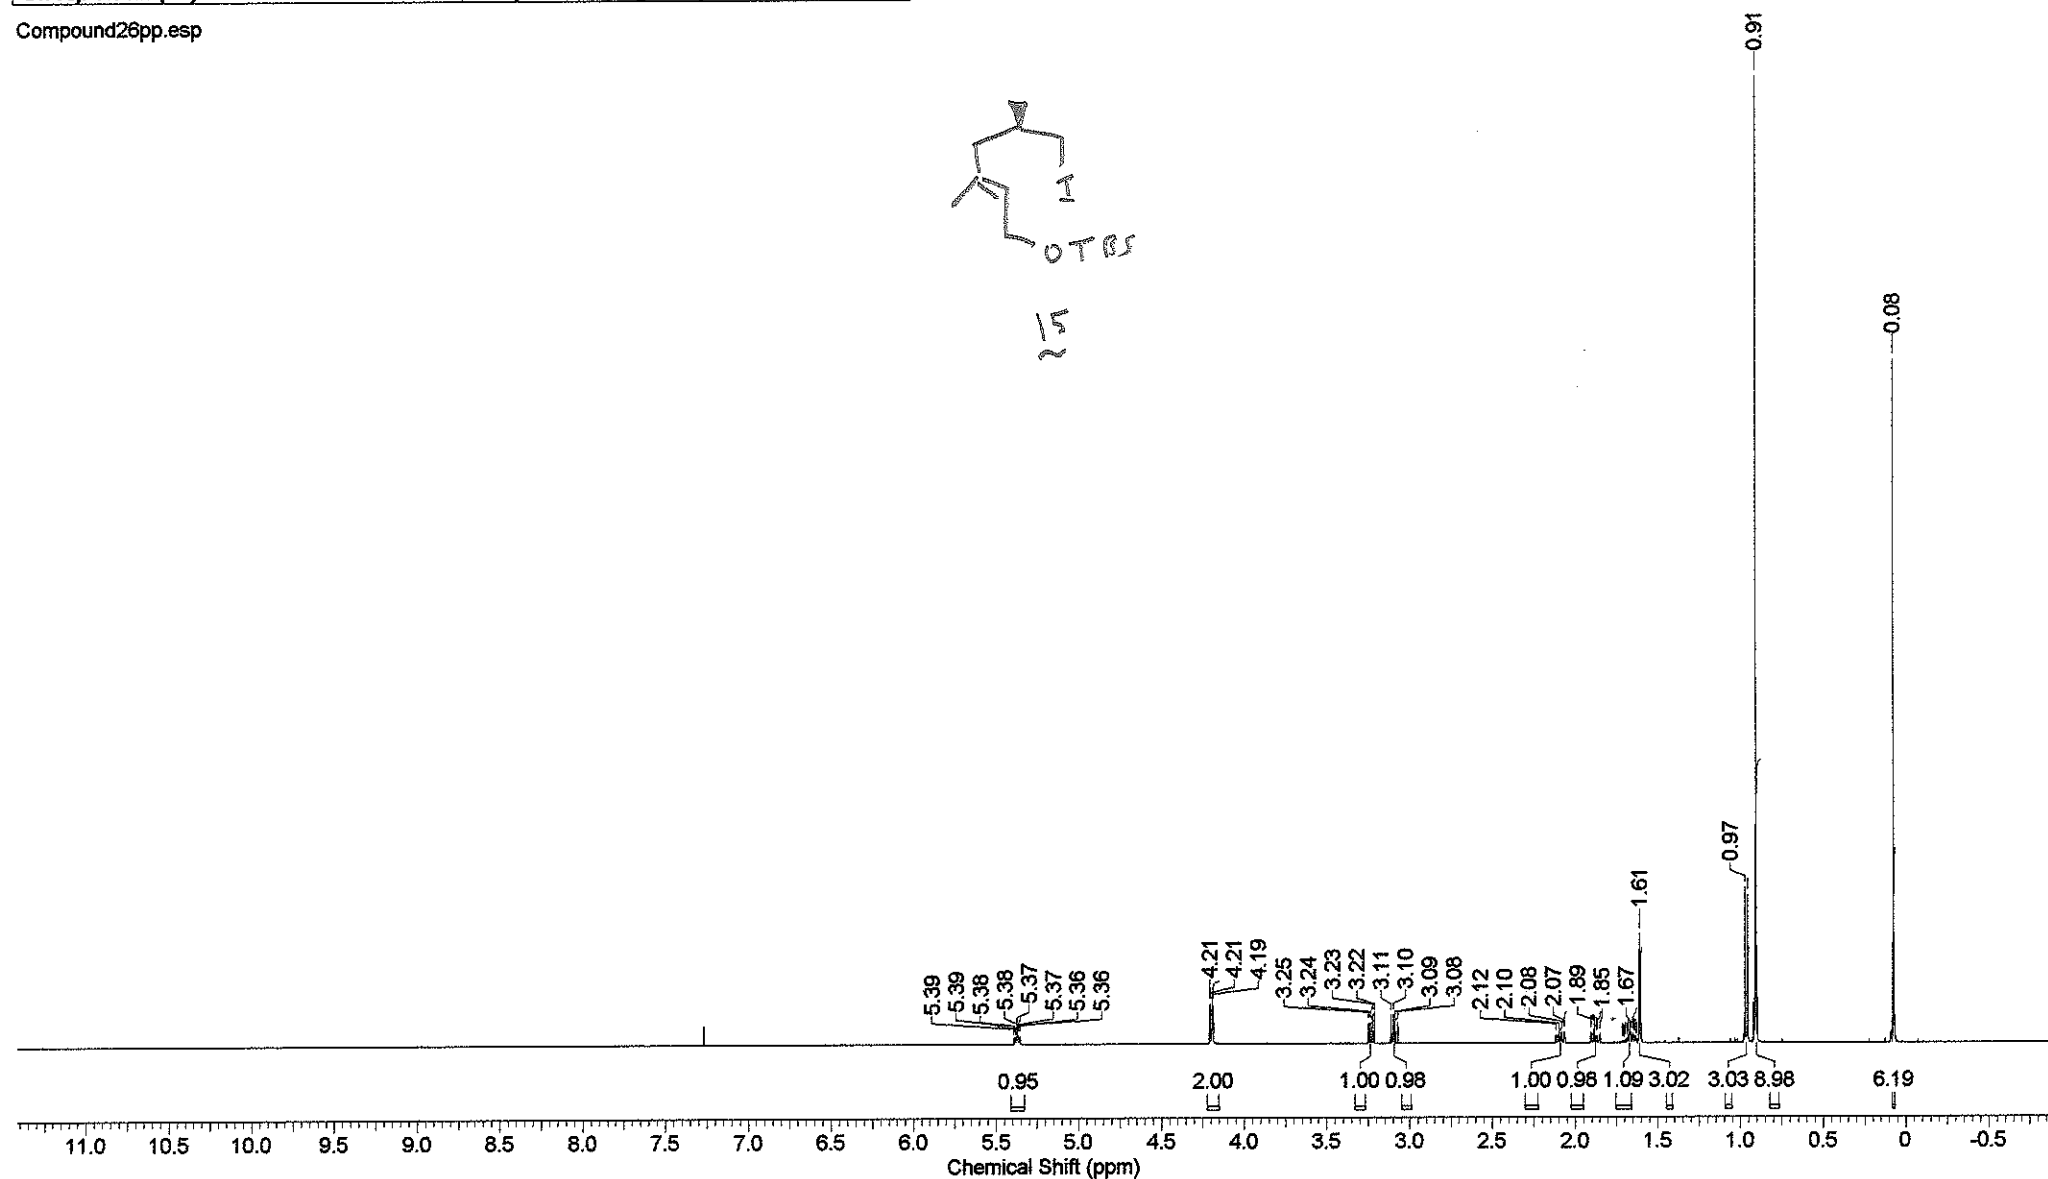

|                        |                      |                        |                                                             |                      |                      |
|------------------------|----------------------|------------------------|-------------------------------------------------------------|----------------------|----------------------|
| Acquisition Time (sec) | 1.0835               | Comment                | MWB048pc mCARBON CDCl3 {e:\bruk400data\2009\Apr} ejt 21     | Date                 | 27 Apr 2009 08:32:00 |
| Date Stamp             | 27 Apr 2009 08:32:00 | File Name              | C:\Users\Mark\Documents\Chemistry\NMR\Data\MWB048pc_000001r |                      |                      |
| Frequency (MHz)        | 100.61               | Nucleus                | 13C                                                         | Number of Transients | 256                  |
| Original Points Count  | 32768                | Owner                  | Administrator                                               | Points Count         | 32768                |
| Receiver Gain          | 512.00               | SW(cyclical) (Hz)      | 30241.94                                                    | Solvent              | CHLOROFORM-d         |
| Sweep Width (Hz)       | 30241.01             | Temperature (degree C) | 22.700                                                      | Spectrum Offset (Hz) | 11332.2383           |

Compound26pc.esp

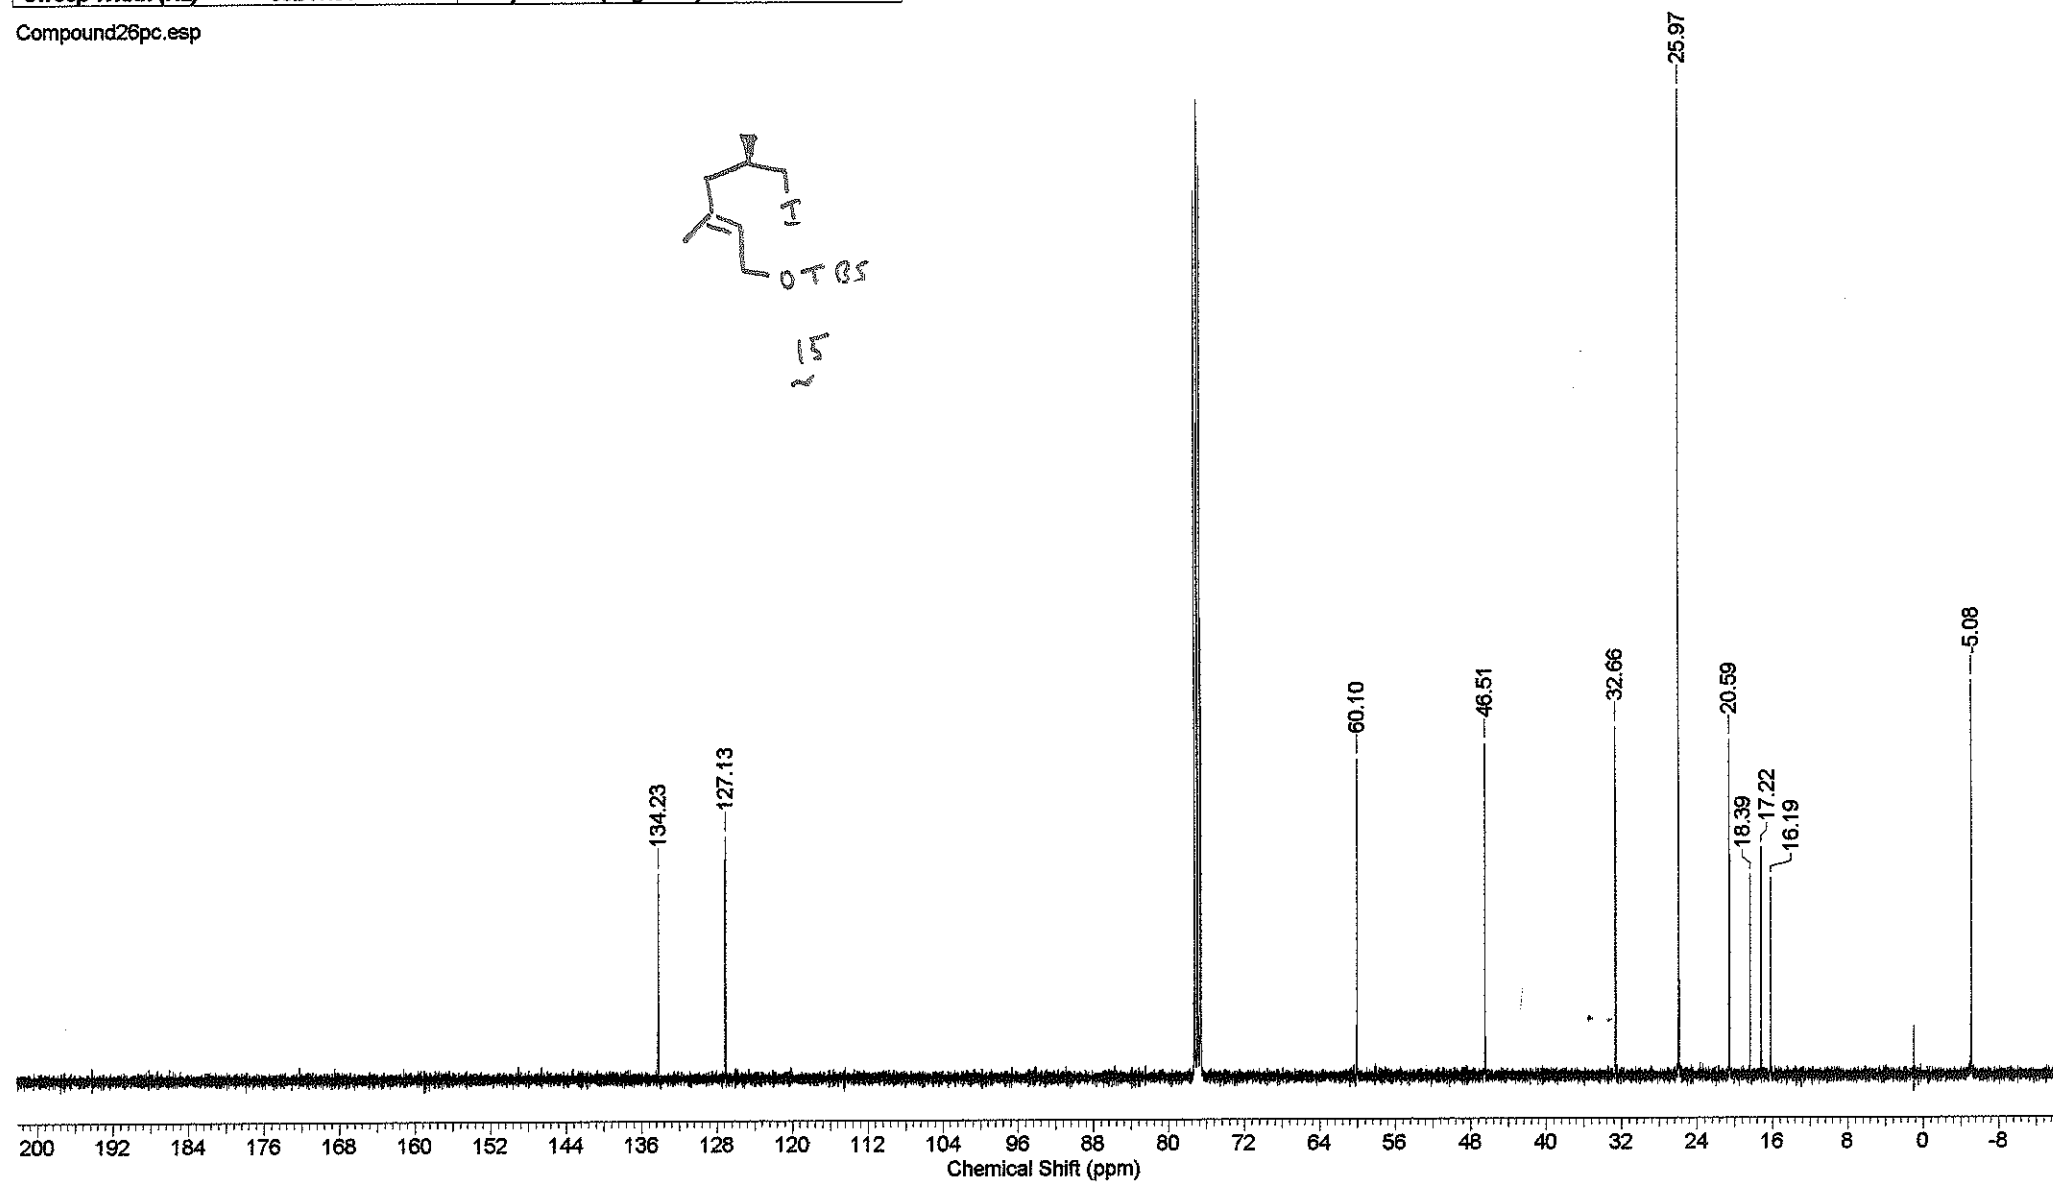

|                               |                      |                               |                                                         |                                                                     |                      |
|-------------------------------|----------------------|-------------------------------|---------------------------------------------------------|---------------------------------------------------------------------|----------------------|
| <b>Acquisition Time (sec)</b> | 3.9649               | <b>Comment</b>                | MWC023pp mPROTON CDCl3 {e:\bruk400data\2009\Oct} ejt 32 | <b>Date</b>                                                         | 09 Oct 2009 15:53:36 |
| <b>Date Stamp</b>             | 09 Oct 2009 15:53:36 |                               | <b>File Name</b>                                        | I:\Chemistry\NMR\Year 1\Data\Compound27\MWC023pp\MWC023pp_000000fid |                      |
| <b>Frequency (MHz)</b>        | 400.13               | <b>Nucleus</b>                | 1H                                                      | <b>Number of Transients</b>                                         | 16                   |
| <b>Original Points Count</b>  | 32768                | <b>Owner</b>                  | Administrator                                           | <b>Points Count</b>                                                 | 32768                |
| <b>Receiver Gain</b>          | 36.00                | <b>SW(cyclical) (Hz)</b>      | 8264.46                                                 | <b>Solvent</b>                                                      | CHLOROFORM-d         |
| <b>Sweep Width (Hz)</b>       | 8264.21              | <b>Temperature (degree C)</b> | 20.100                                                  | <b>Pulse Sequence</b>                                               | zg30b                |
|                               |                      |                               |                                                         | <b>Spectrum Offset (Hz)</b>                                         | 2464.9451            |

Compound27pp.esp

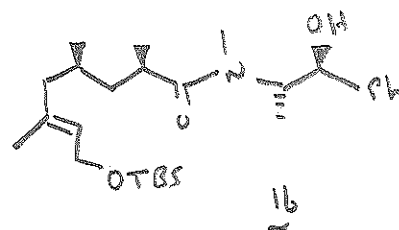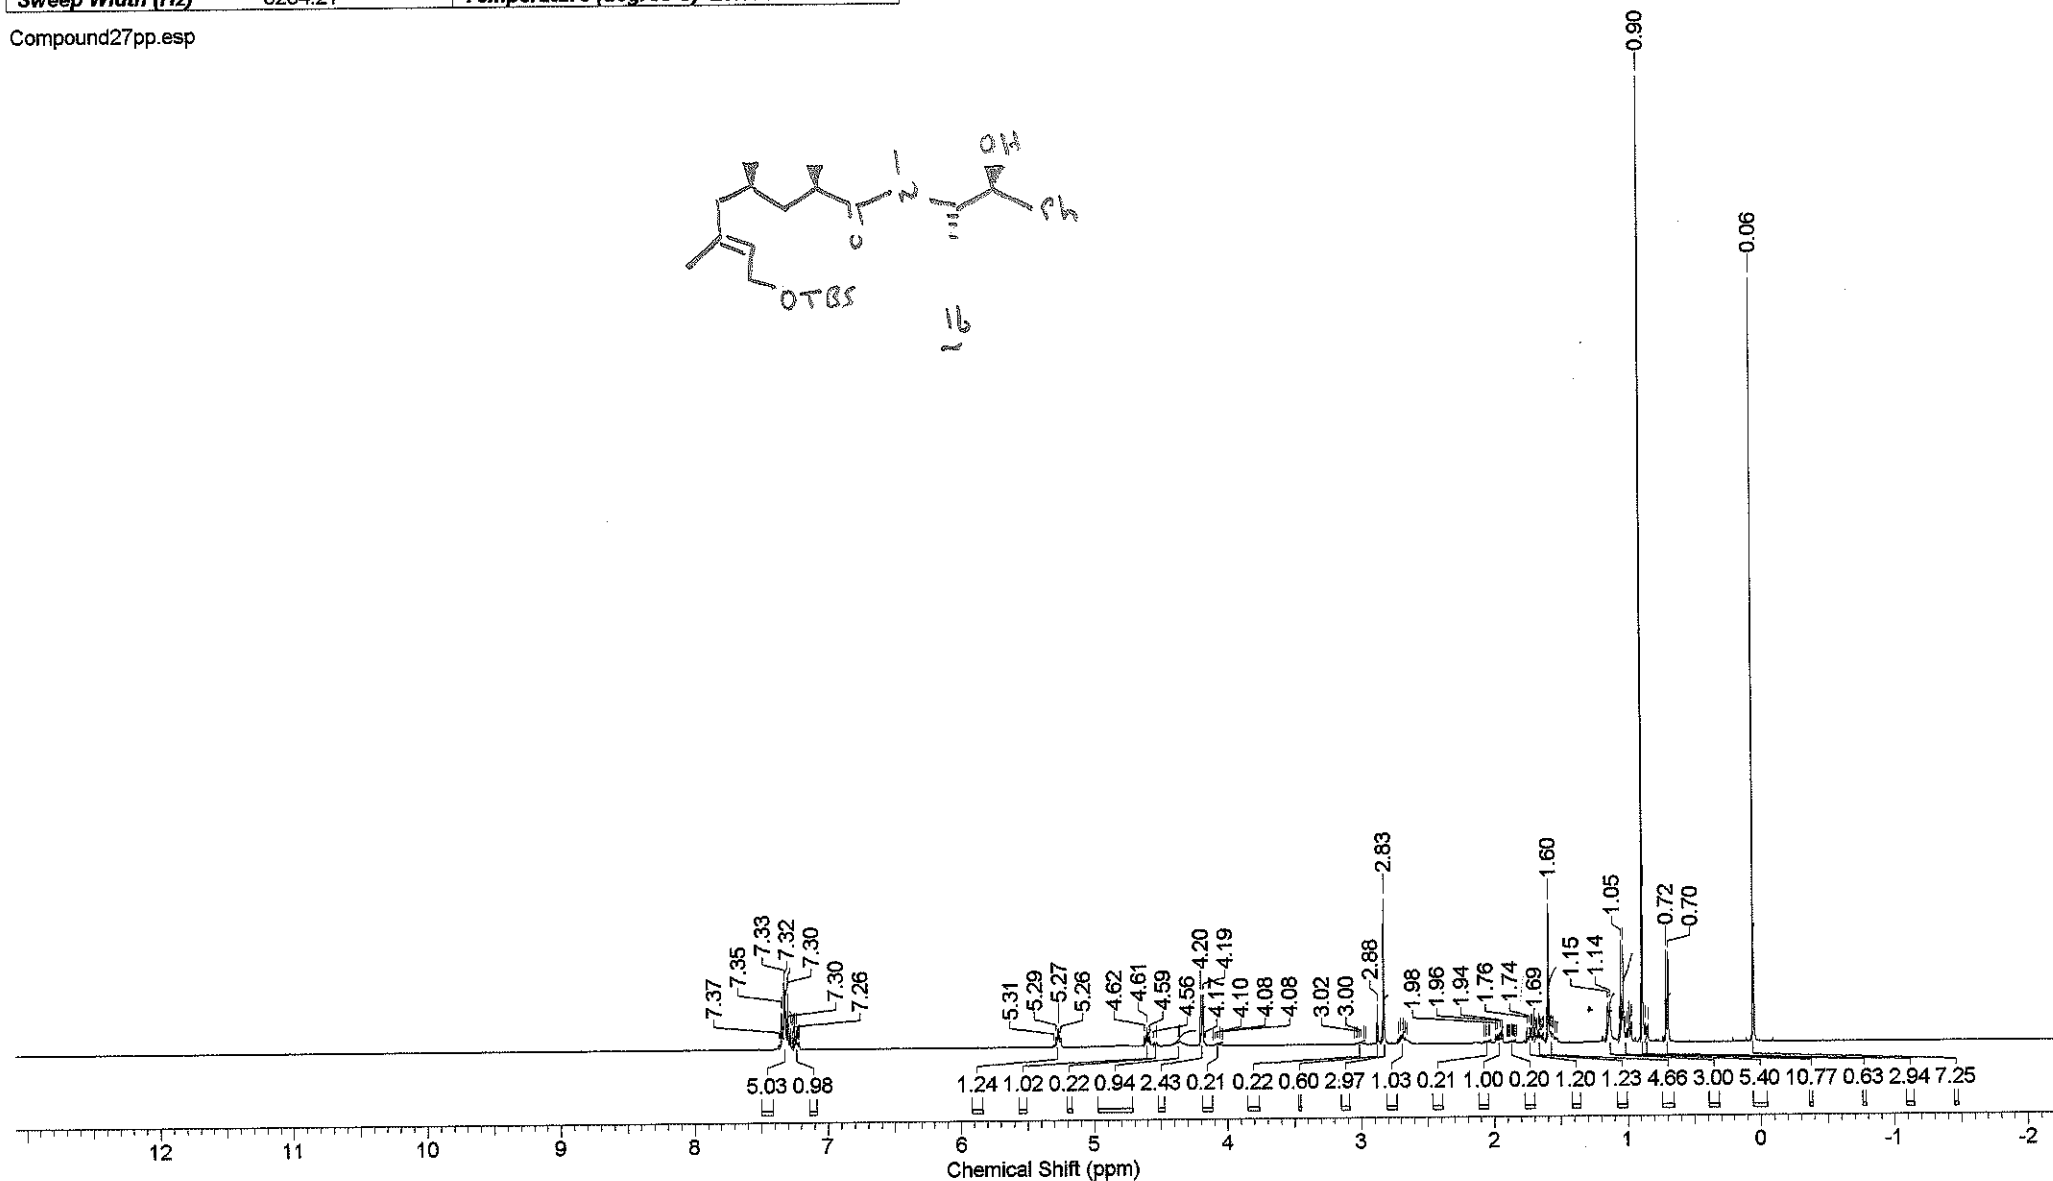

|                               |                      |                               |                                                          |                             |                      |
|-------------------------------|----------------------|-------------------------------|----------------------------------------------------------|-----------------------------|----------------------|
| <b>Acquisition Time (sec)</b> | 1.0835               | <b>Comment</b>                | MWC023pc mCARBON CDCl3 {e:\bruk400data\2009\Oct\} ejt 32 | <b>Date</b>                 | 09 Oct 2009 16:17:04 |
| <b>Date Stamp</b>             | 09 Oct 2009 16:17:04 | <b>File Name</b>              | I:\Chemistry\NMR\Year 1\Data\Compound27\MWC023pc_000001r |                             |                      |
| <b>Frequency (MHz)</b>        | 100.61               | <b>Nucleus</b>                | 13C                                                      | <b>Number of Transients</b> | 256                  |
| <b>Original Points Count</b>  | 32768                | <b>Owner</b>                  | Administrator                                            | <b>Points Count</b>         | 32768                |
| <b>Receiver Gain</b>          | 512.00               | <b>SW(cyclical) (Hz)</b>      | 30241.94                                                 | <b>Solvent</b>              | CHLOROFORM-d         |
| <b>Sweep Width (Hz)</b>       | 30241.01             | <b>Temperature (degree C)</b> | 20.600                                                   | <b>Pulse Sequence</b>       | zgpg30               |
|                               |                      |                               |                                                          | <b>Spectrum Offset (Hz)</b> | 11325.7686           |

Compound27pc.esp

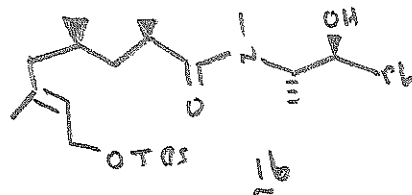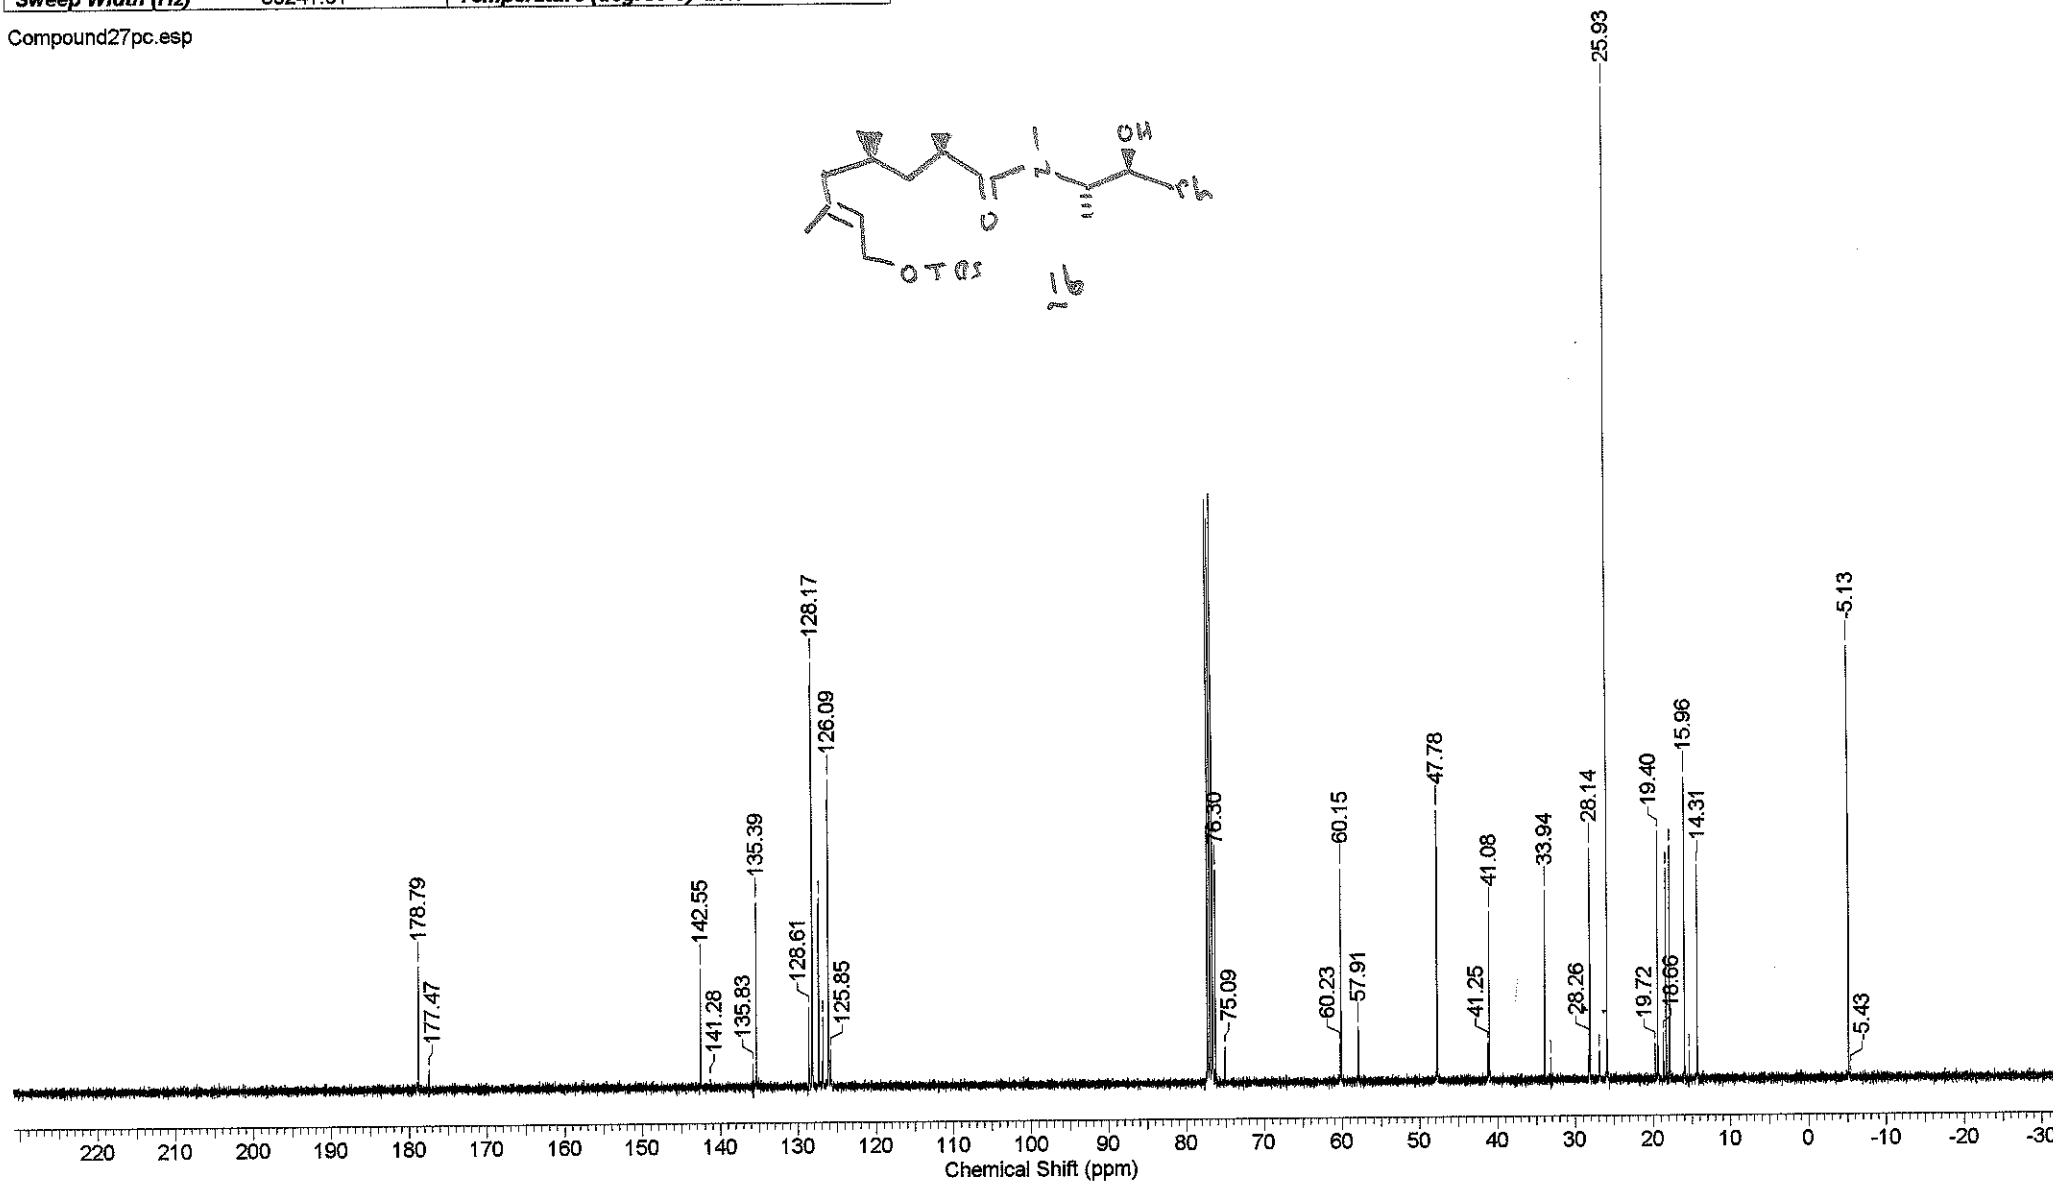

|                               |                      |                               |                                                                        |                             |                      |
|-------------------------------|----------------------|-------------------------------|------------------------------------------------------------------------|-----------------------------|----------------------|
| <b>Acquisition Time (sec)</b> | 3.9649               | <b>Comment</b>                | MWB055pp mPROTON CDCl3 {e:\bruk400data\2009\May} ejt 23                | <b>Date</b>                 | 11 May 2009 10:46:24 |
| <b>Date Stamp</b>             | 11 May 2009 10:46:24 | <b>File Name</b>              | C:\Users\Mark\Documents\Chemistry\NMR\Data\MWB055pp\MWB055pp_000000fid |                             |                      |
| <b>Frequency (MHz)</b>        | 400.13               | <b>Nucleus</b>                | 1H                                                                     | <b>Number of Transients</b> | 16                   |
| <b>Original Points Count</b>  | 32768                | <b>Owner</b>                  | Administrator                                                          | <b>Points Count</b>         | 32768                |
| <b>Receiver Gain</b>          | 64.00                | <b>SW(cyclical) (Hz)</b>      | 8264.46                                                                | <b>Solvent</b>              | CHLOROFORM-d         |
| <b>Sweep Width (Hz)</b>       | 8264.21              | <b>Temperature (degree C)</b> | 21.300                                                                 | <b>Pulse Sequence</b>       | zg30b                |
|                               |                      |                               |                                                                        | <b>Spectrum Offset (Hz)</b> | 2465.1973            |

Compound28pp.esp

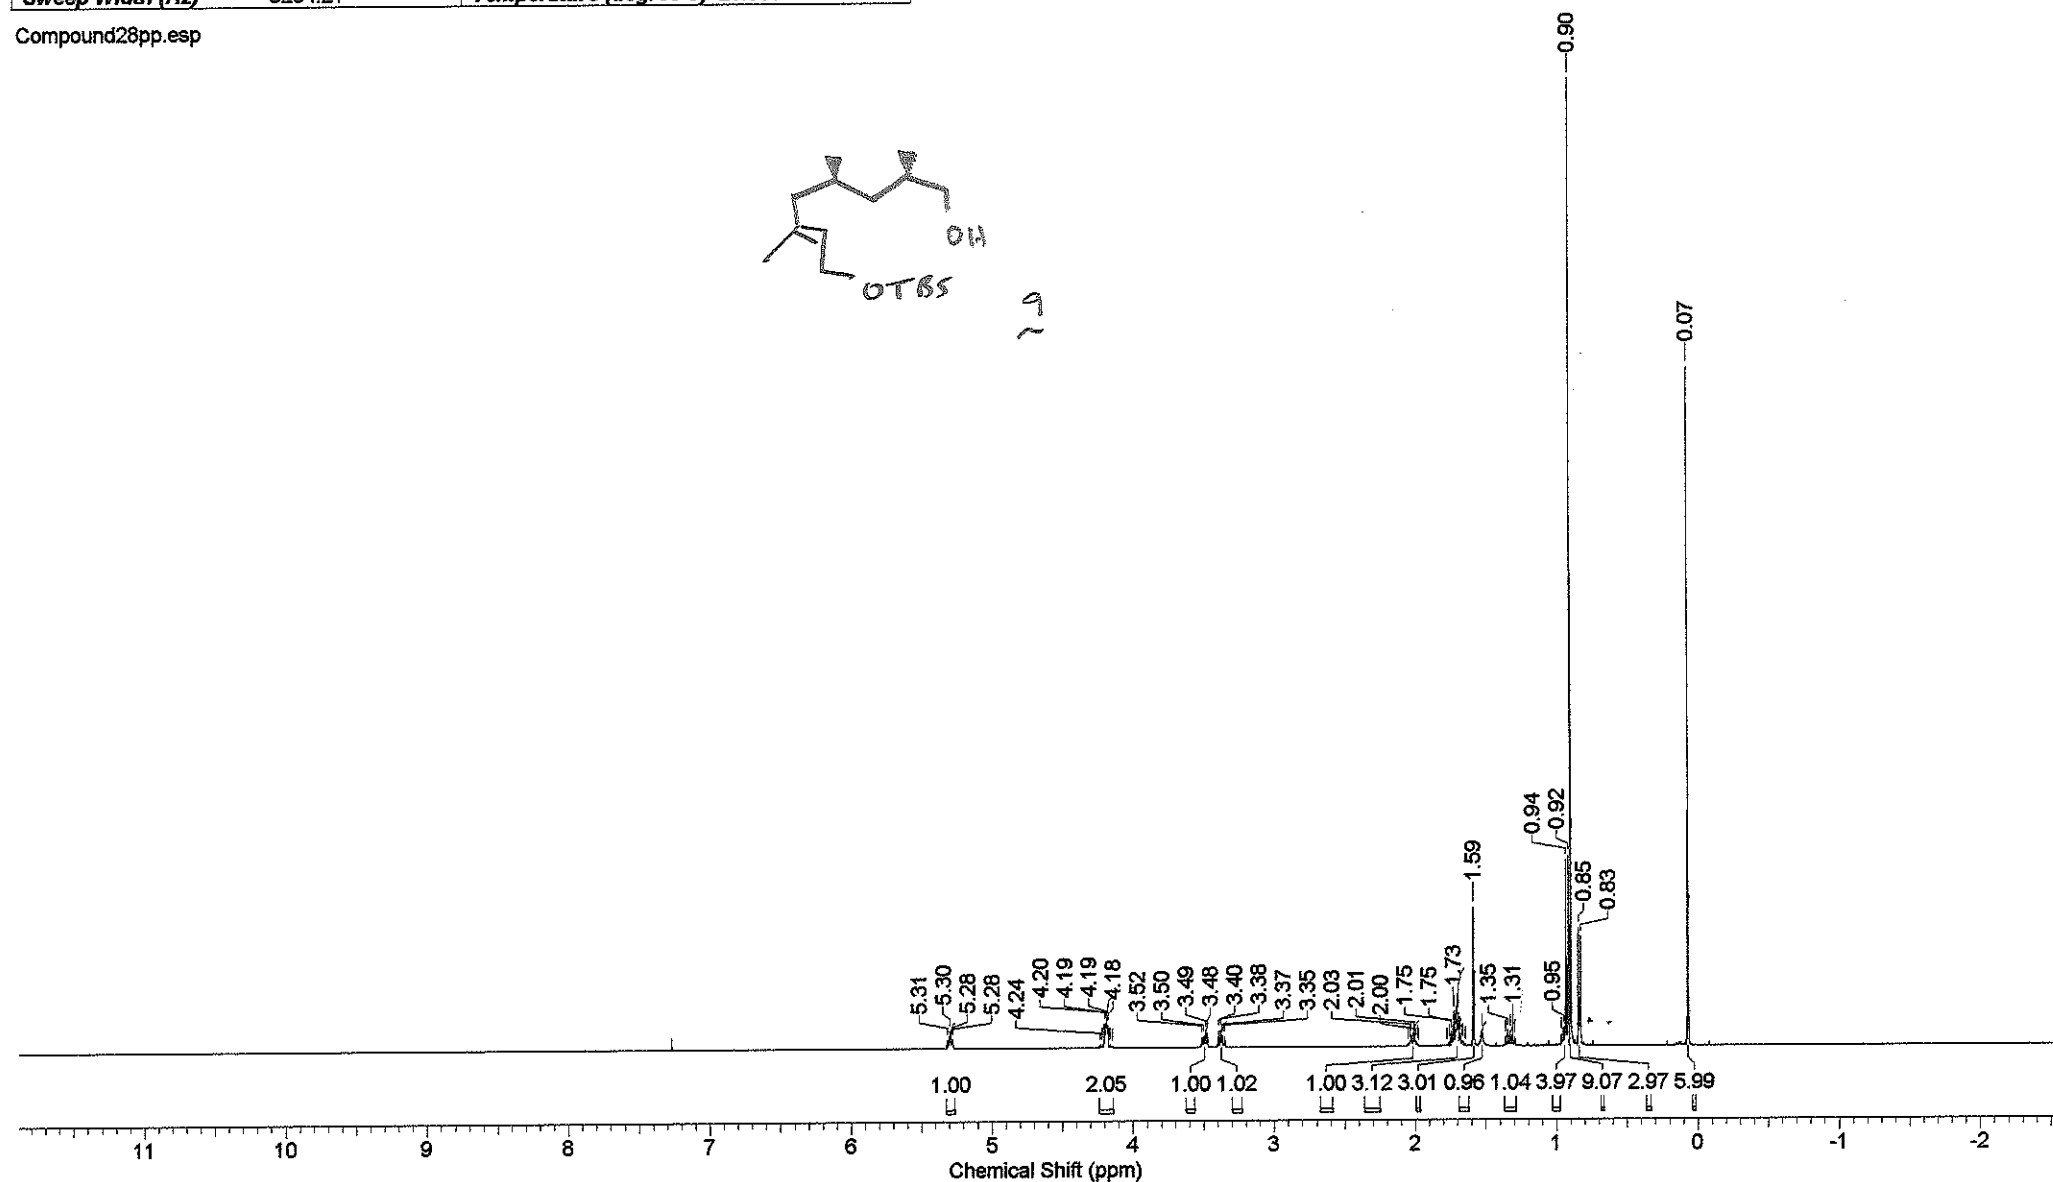

|                               |                      |                               |                                                             |                             |                      |
|-------------------------------|----------------------|-------------------------------|-------------------------------------------------------------|-----------------------------|----------------------|
| <b>Acquisition Time (sec)</b> | 1.0835               | <b>Comment</b>                | MWB055pc mCARBON CDCl3 (e:\bruk400\data\2009\May) ejt 23    | <b>Date</b>                 | 11 May 2009 11:09:52 |
| <b>Date Stamp</b>             | 11 May 2009 11:09:52 | <b>File Name</b>              | C:\Users\Mark\Documents\Chemistry\NMR\Data\MWB055pc_000001r |                             |                      |
| <b>Frequency (MHz)</b>        | 100.61               | <b>Nucleus</b>                | 13C                                                         | <b>Number of Transients</b> | 256                  |
| <b>Original Points Count</b>  | 32768                | <b>Owner</b>                  | Administrator                                               | <b>Points Count</b>         | 32768                |
| <b>Receiver Gain</b>          | 512.00               | <b>SW(cyclical) (Hz)</b>      | 30241.94                                                    | <b>Solvent</b>              | CHLOROFORM-d         |
| <b>Sweep Width (Hz)</b>       | 30241.01             | <b>Temperature (degree C)</b> | 21.900                                                      | <b>Spectrum Offset (Hz)</b> | 11332.2295           |

Compound28pc.esp

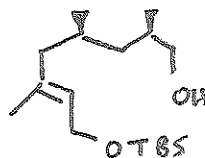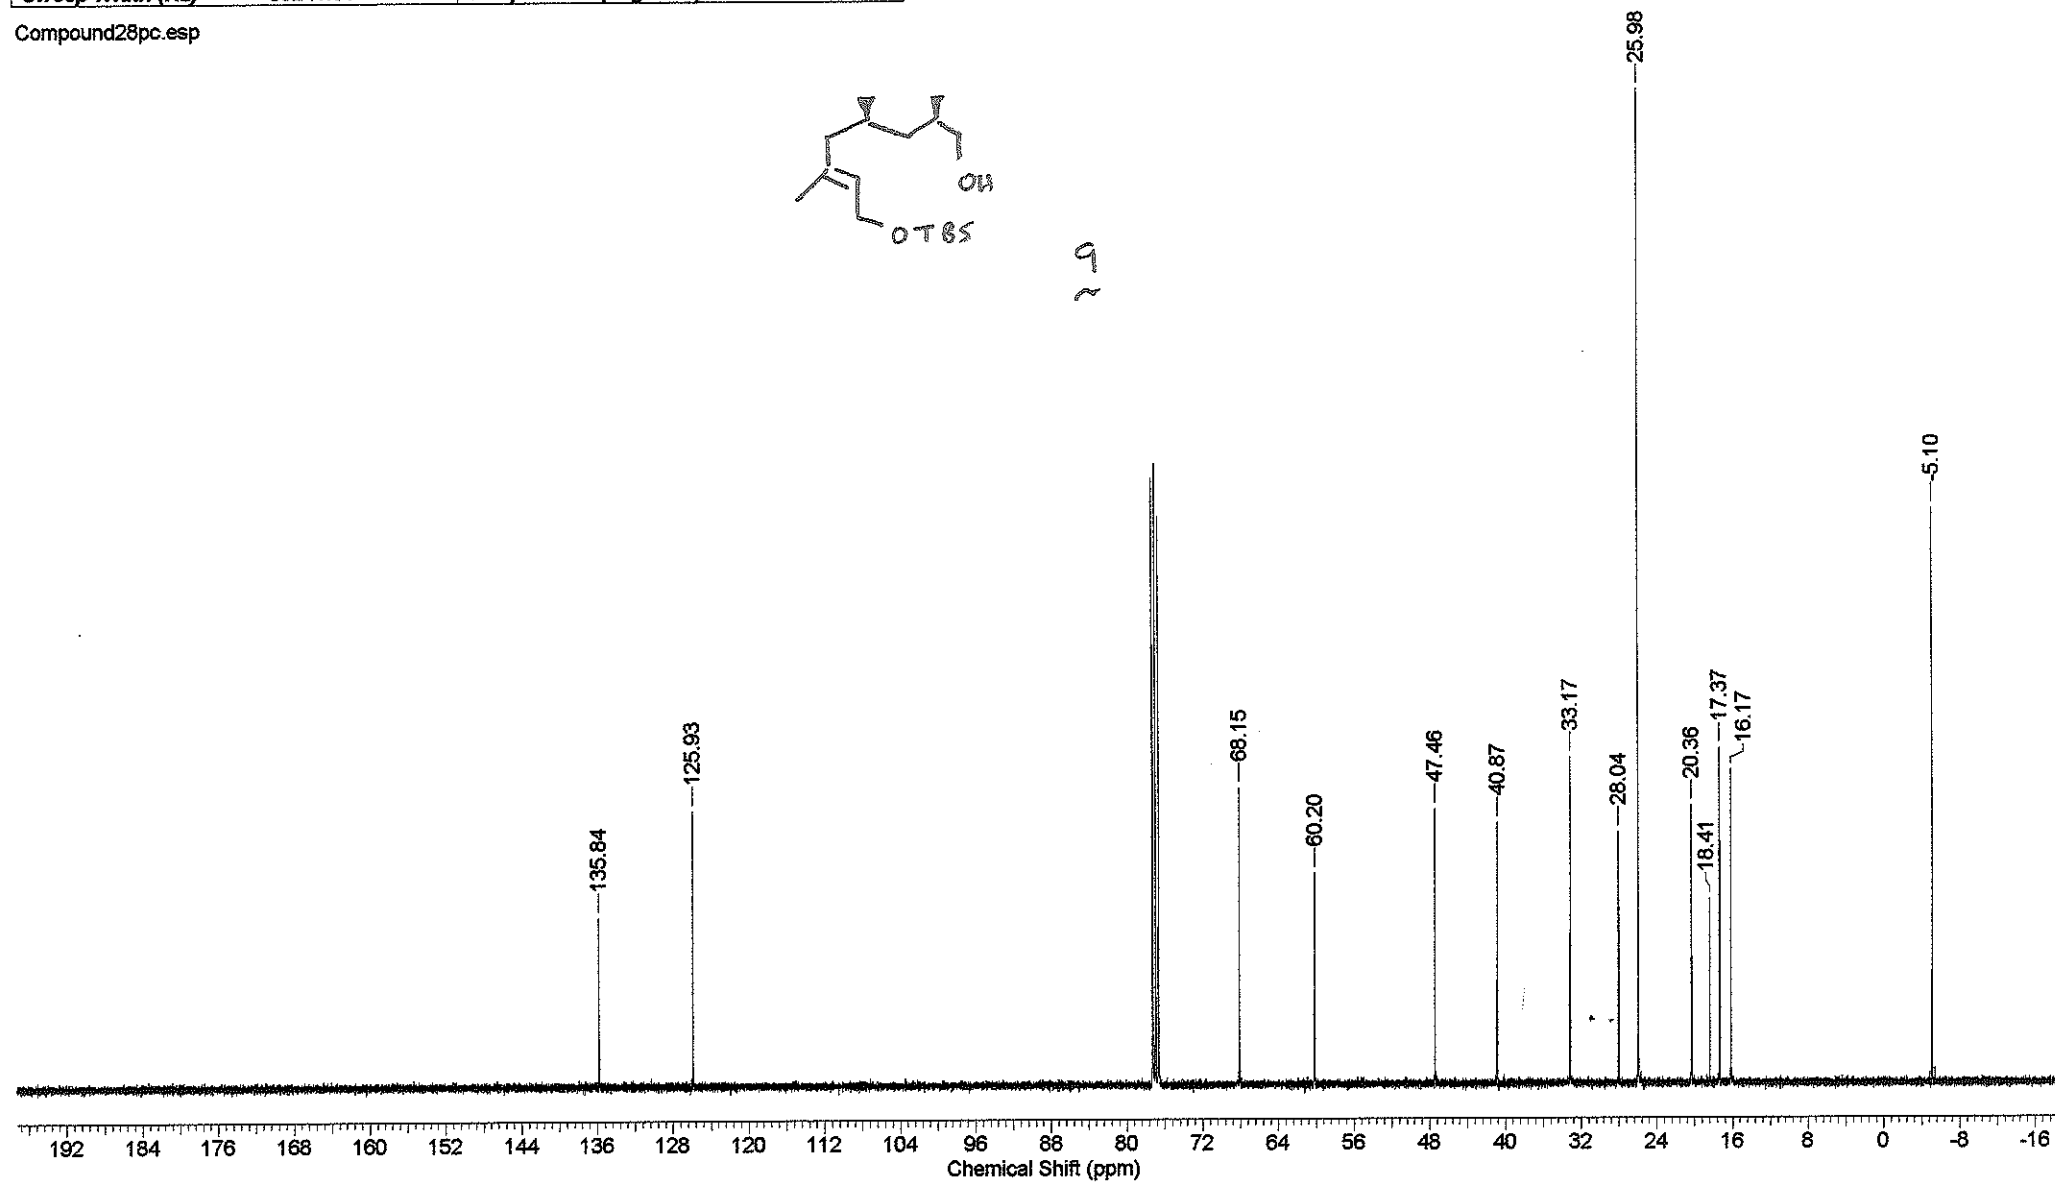

|                               |                      |                               |                                                                    |                             |                      |
|-------------------------------|----------------------|-------------------------------|--------------------------------------------------------------------|-----------------------------|----------------------|
| <b>Acquisition Time (sec)</b> | 3.1719               | <b>Comment</b>                | MWC045pp mPROTON CDCl3 /opt/bruk500data/2009/Nov ejt 30            | <b>Date</b>                 | 16 Nov 2009 07:55:44 |
| <b>Date Stamp</b>             | 16 Nov 2009 07:55:44 | <b>File Name</b>              | F:\Chemistry\Year 1 data\NMR data\Data\Compound33\MWC045pp_000001r |                             |                      |
| <b>Frequency (MHz)</b>        | 500.13               | <b>Nucleus</b>                | 1H                                                                 | <b>Number of Transients</b> | 16                   |
| <b>Original Points Count</b>  | 32768                | <b>Owner</b>                  | vnmr1                                                              | <b>Points Count</b>         | 32768                |
| <b>Receiver Gain</b>          | 20.20                | <b>SW(cyclical) (Hz)</b>      | 10330.58                                                           | <b>Solvent</b>              | CHLOROFORM-d         |
| <b>Sweep Width (Hz)</b>       | 10330.26             | <b>Temperature (degree C)</b> | 20.001                                                             | <b>Pulse Sequence</b>       | zg30b                |
|                               |                      |                               |                                                                    | <b>Spectrum Offset (Hz)</b> | 3052.8643            |

Compound33pp.esp

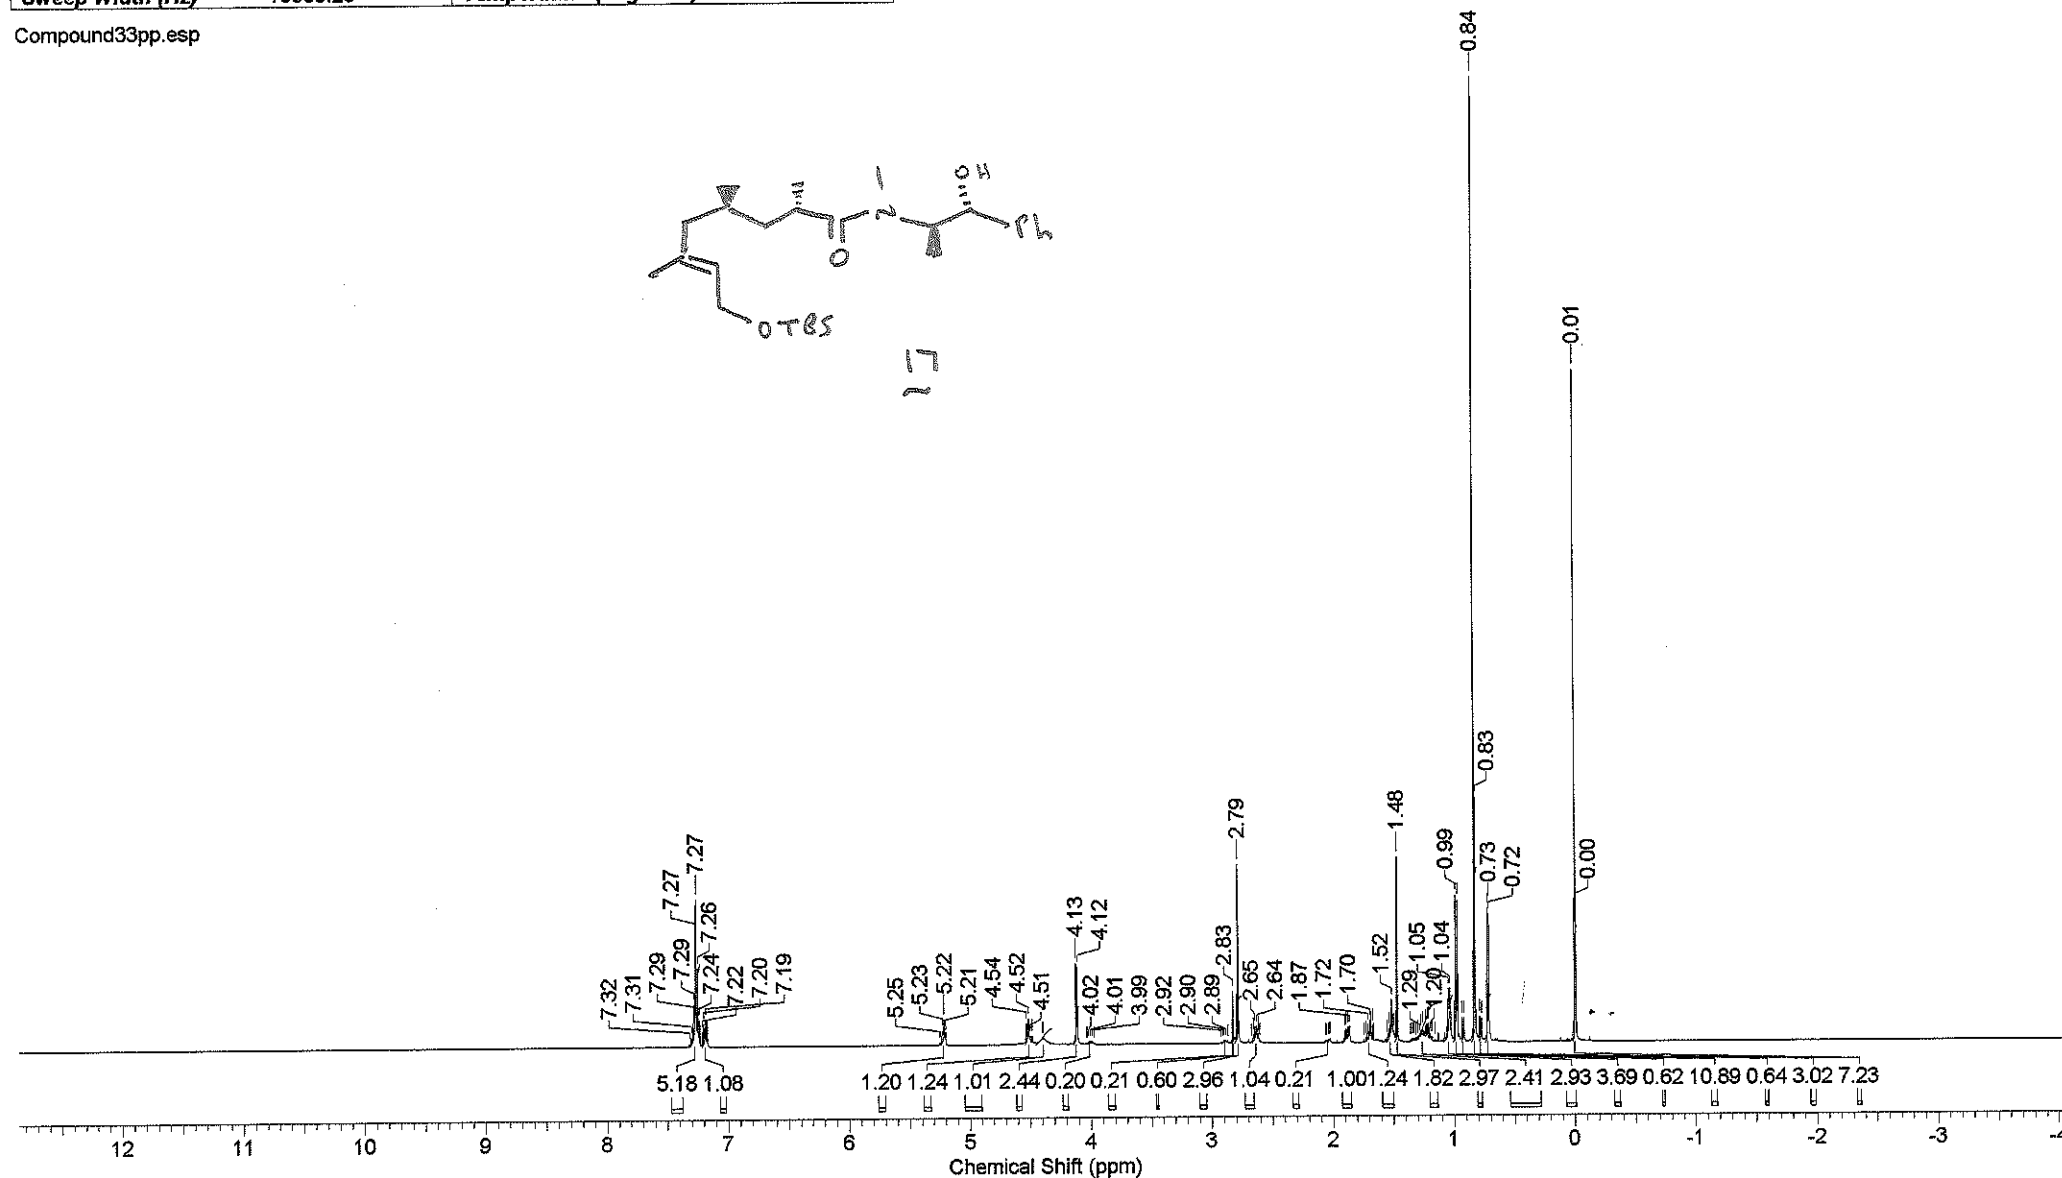



|                               |                      |                               |                                                                    |                             |                      |
|-------------------------------|----------------------|-------------------------------|--------------------------------------------------------------------|-----------------------------|----------------------|
| <b>Acquisition Time (sec)</b> | 1.1010               | <b>Comment</b>                | MWC045pc mCARBON CDCl3 /opt/bruk500data/2009/Nov ejt 30            | <b>Date</b>                 | 16 Nov 2009 08:17:04 |
| <b>Date Stamp</b>             | 16 Nov 2009 08:17:04 | <b>File Name</b>              | F:\Chemistry\Year 1 data\NMR data\Data\Compound33\MWC045pc_000001r | <b>Number of Transients</b> | 256                  |
| <b>Frequency (MHz)</b>        | 125.76               | <b>Nucleus</b>                | 13C                                                                | <b>Origin</b>               | spect                |
| <b>Original Points Count</b>  | 32768                | <b>Owner</b>                  | vnmr1                                                              | <b>Pulse Sequence</b>       | zgpg30               |
| <b>Receiver Gain</b>          | 512.00               | <b>SW(cyclical) (Hz)</b>      | 29761.90                                                           | <b>Solvent</b>              | CHLOROFORM-d         |
| <b>Sweep Width (Hz)</b>       | 29761.00             | <b>Temperature (degree C)</b> | 20.001                                                             | <b>Spectrum Offset (Hz)</b> | 12563.9004           |

Compound33pc.esp

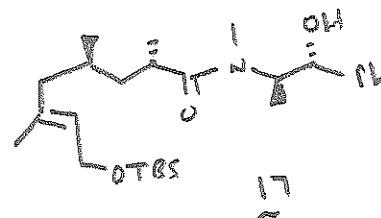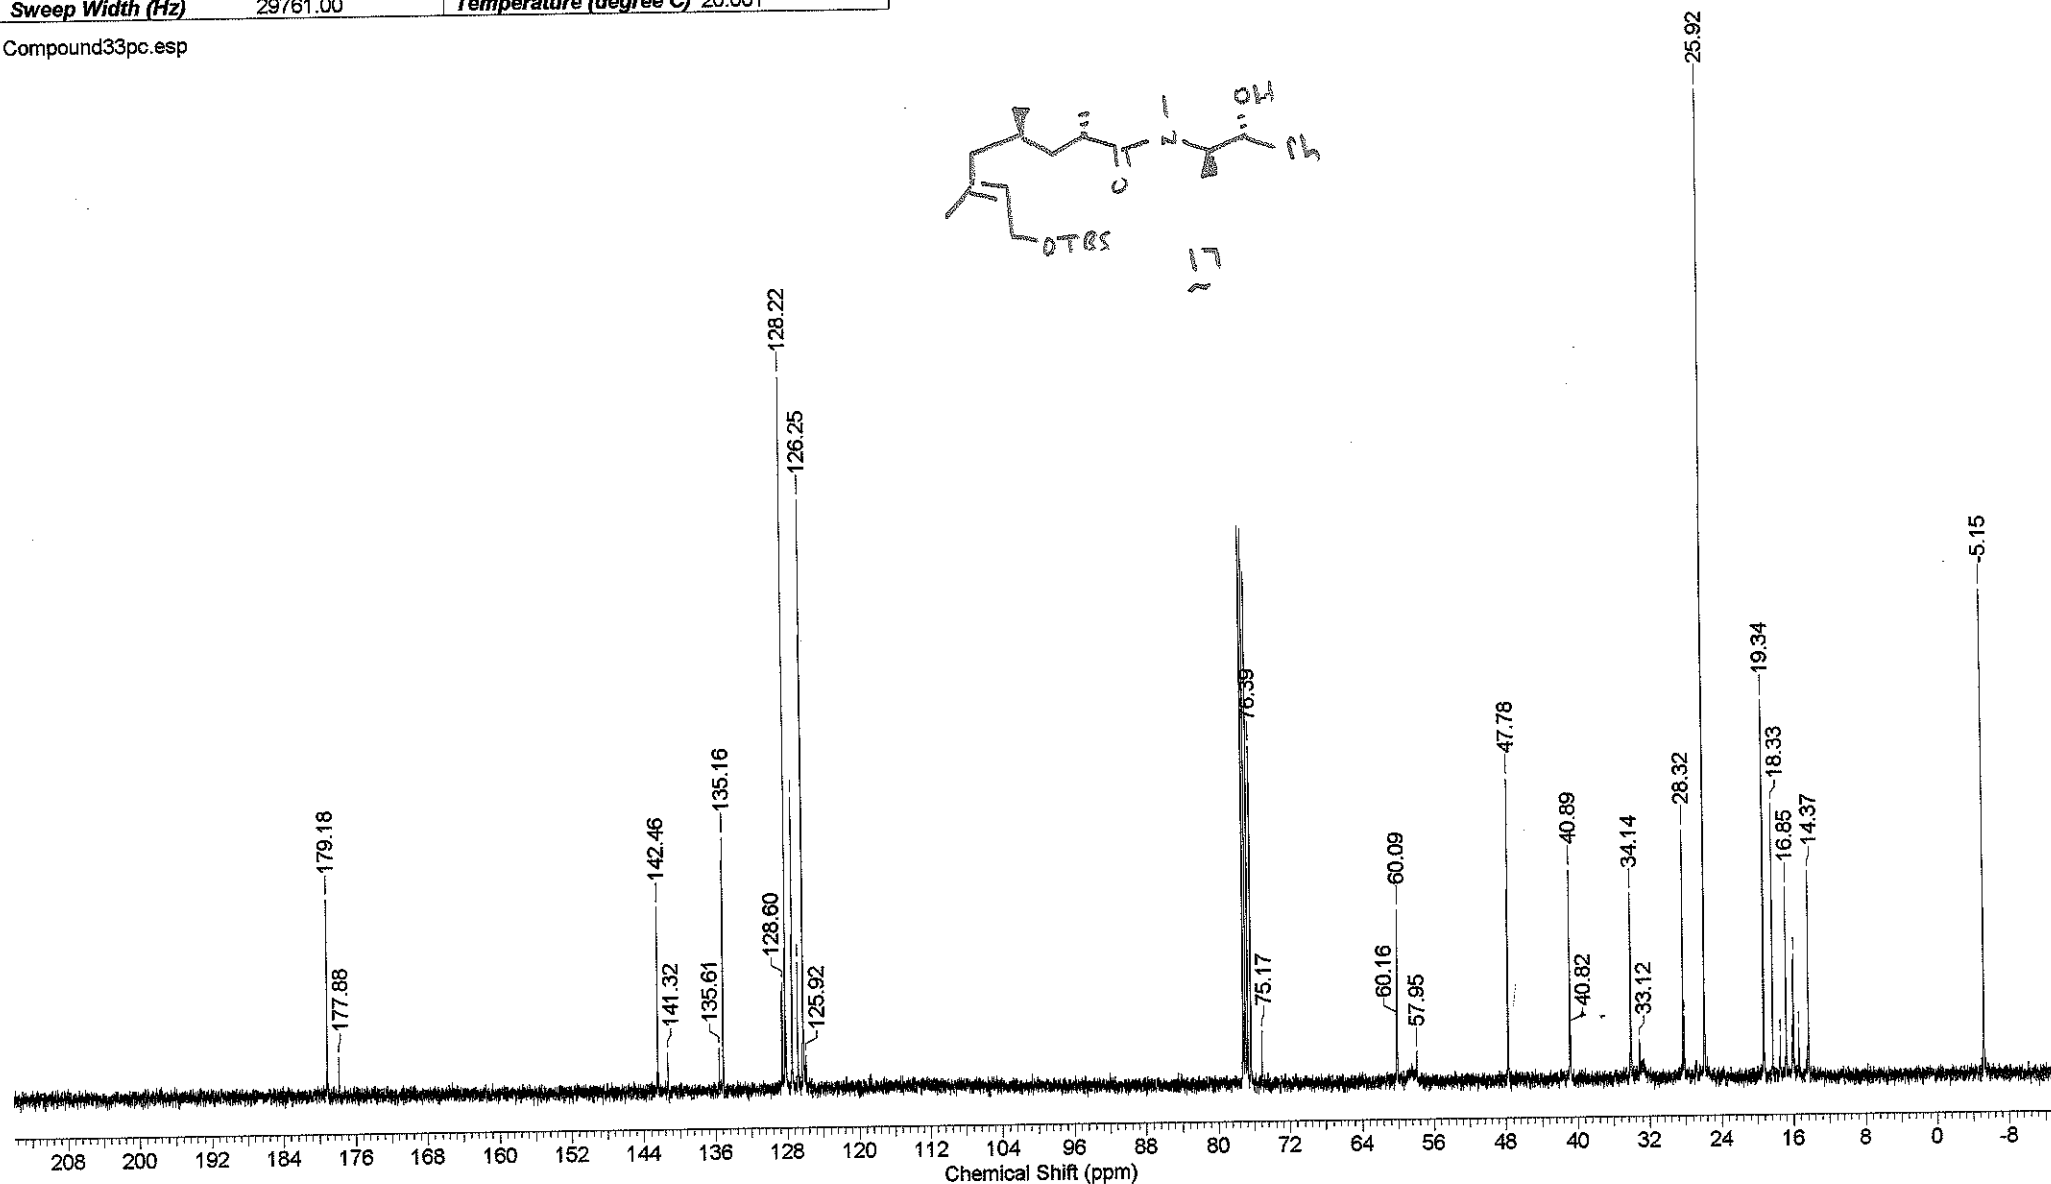

|                        |                      |                        |                                                                     |                      |                      |
|------------------------|----------------------|------------------------|---------------------------------------------------------------------|----------------------|----------------------|
| Acquisition Time (sec) | 3.9649               | Comment                | MWC053pp mPROTON CDCl3 {e:\bruk400data\2009\Nov} ejt 26             | Date                 | 26 Nov 2009 09:48:48 |
| Date Stamp             | 26 Nov 2009 09:48:48 | File Name              | I:\Chemistry\NMR\Year 1\Data\Compound34\MWC053pp\MWC053pp_000000fid |                      |                      |
| Frequency (MHz)        | 400.13               | Nucleus                | 1H                                                                  | Number of Transients | 16                   |
| Original Points Count  | 32768                | Owner                  | Administrator                                                       | Points Count         | 32768                |
| Receiver Gain          | 71.80                | SW(cyclical) (Hz)      | 8264.46                                                             | Solvent              | CHLOROFORM-d         |
| Sweep Width (Hz)       | 8264.21              | Temperature (degree C) | 19.900                                                              | Spectrum Offset (Hz) | 2464.9451            |

Compound34pp.esp

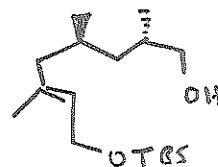

18

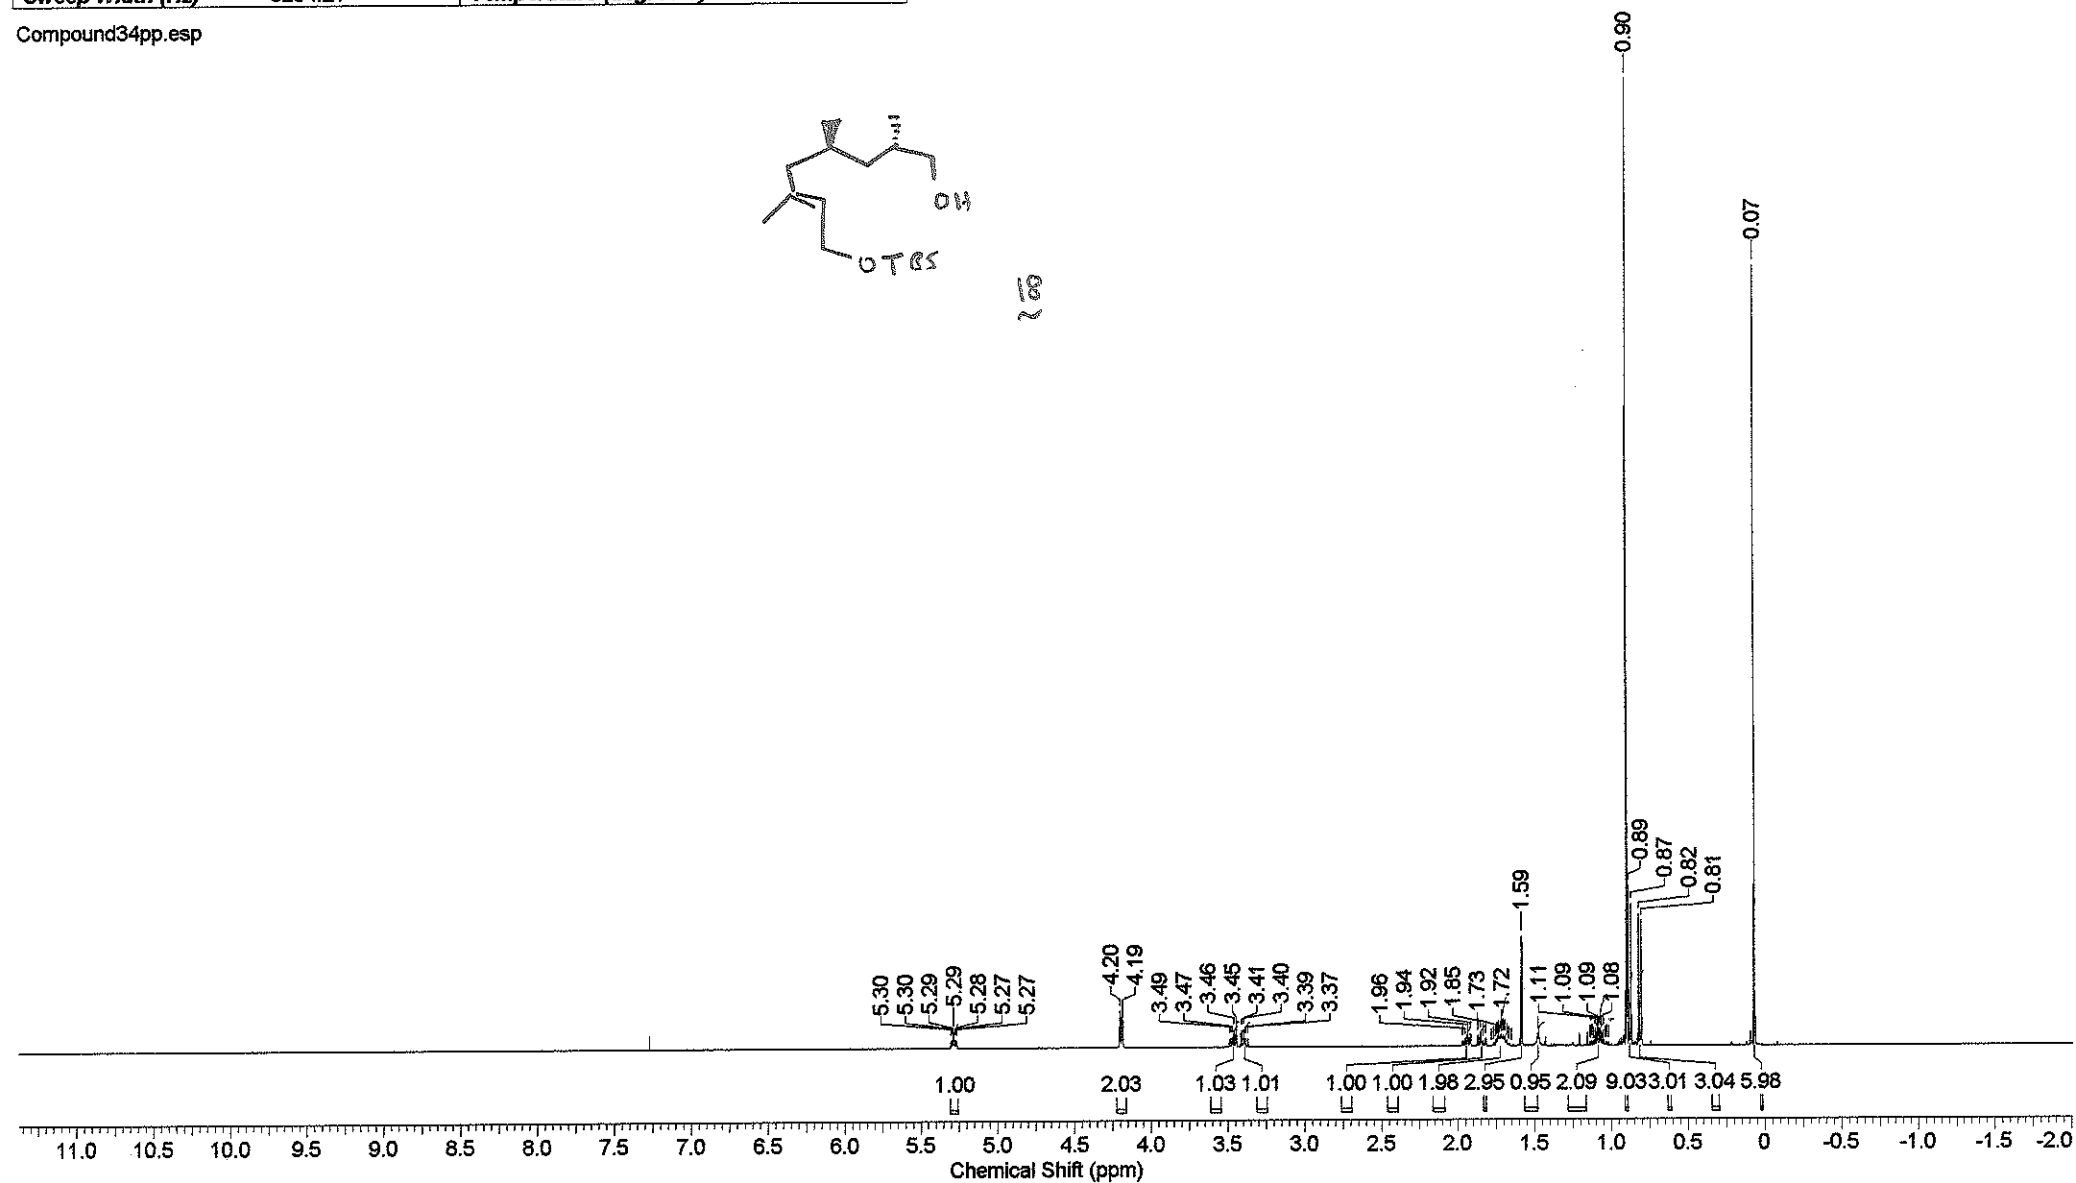

|                        |                      |                        |                                                           |                      |                      |
|------------------------|----------------------|------------------------|-----------------------------------------------------------|----------------------|----------------------|
| Acquisition Time (sec) | 1.0835               | Comment                | MWVC053pc mCARBON CDCl3 {e:\bruk400data\2009\Nov} ejt 26  | Date                 | 26 Nov 2009 10:12:16 |
| Date Stamp             | 26 Nov 2009 10:12:16 | File Name              | I:\Chemistry\NMR\Year 1\Data\Compound34\MWVC053pc_000001r |                      |                      |
| Frequency (MHz)        | 100.61               | Nucleus                | 13C                                                       | Number of Transients | 256                  |
| Original Points Count  | 32768                | Owner                  | Administrator                                             | Points Count         | 32768                |
| Receiver Gain          | 512.00               | SW(cyclical) (Hz)      | 30241.94                                                  | Solvent              | CHLOROFORM-d         |
| Sweep Width (Hz)       | 30241.01             | Temperature (degree C) | 20.500                                                    | Spectrum Offset (Hz) | 11332.2383           |

Compound34pc.esp

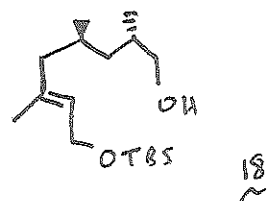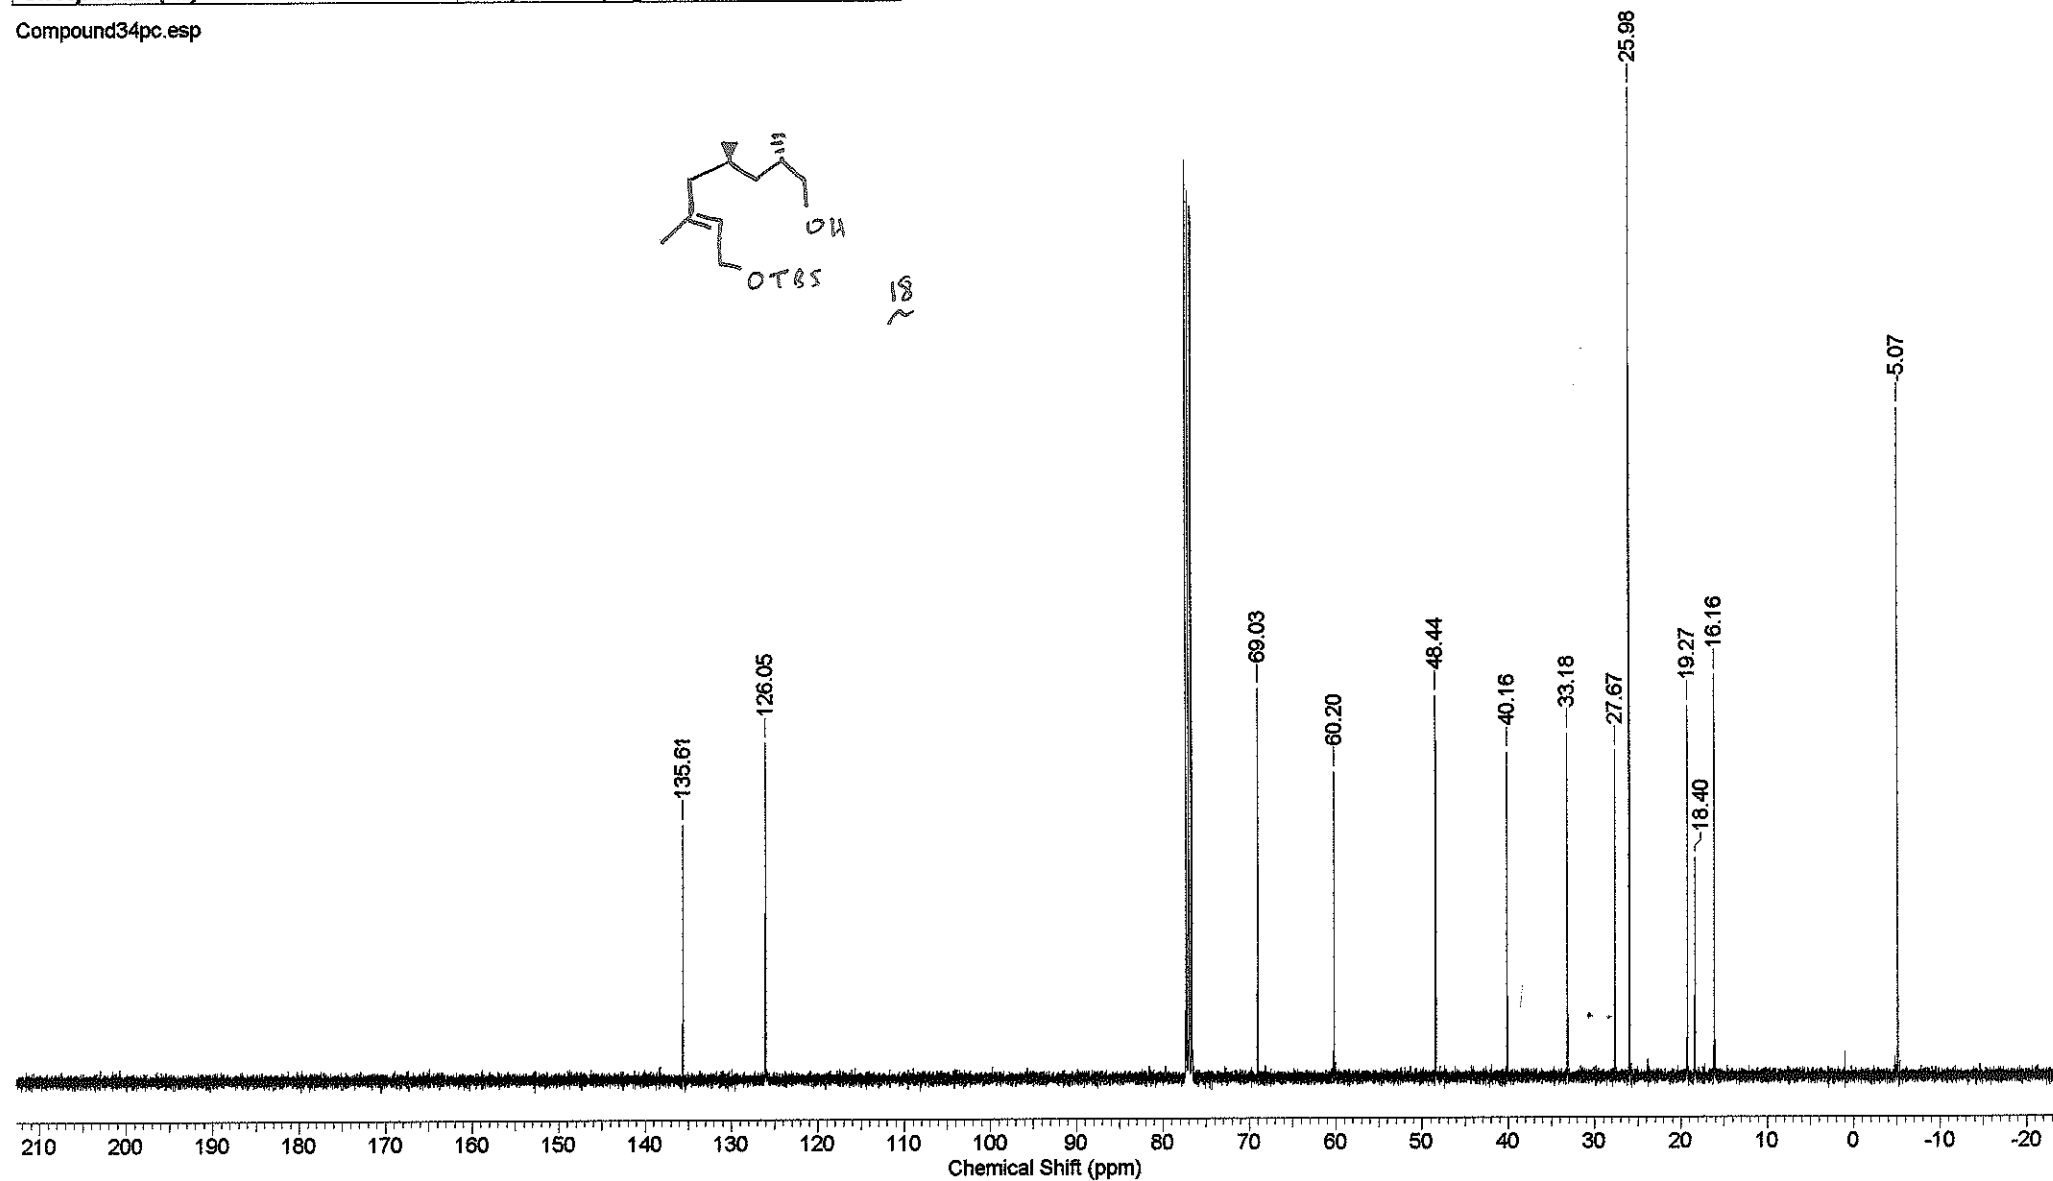

|                        |                      |                        |                                                                     |                      |                      |
|------------------------|----------------------|------------------------|---------------------------------------------------------------------|----------------------|----------------------|
| Acquisition Time (sec) | 3.1719               | Comment                | MWE086pp mPROTON CDCl3 /opt/bruk500data/2011/Mar ejt 55             | Date                 | 08 Mar 2011 11:22:40 |
| Date Stamp             | 08 Mar 2011 11:22:40 | File Name              | F:\Chemistry\Year 3 data\NMR data\Data\Compound 12\MWE082pp_000001r |                      |                      |
| Frequency (MHz)        | 500.13               | Nucleus                | <sup>1</sup> H                                                      | Number of Transients | 16                   |
| Original Points Count  | 32768                | Owner                  | vnmr1                                                               | Points Count         | 32768                |
| Receiver Gain          | 18.00                | SW(cyclical) (Hz)      | 10330.58                                                            | Pulse Sequence       | zg30b                |
| Sweep Width (Hz)       | 10330.26             | Temperature (degree C) | 21.637                                                              | Solvent              | CHLOROFORM-d         |
|                        |                      |                        |                                                                     | Spectrum Offset (Hz) | 3079.6616            |

Compound12pp.esp

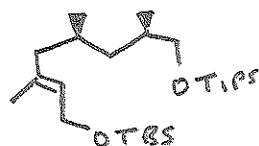

19

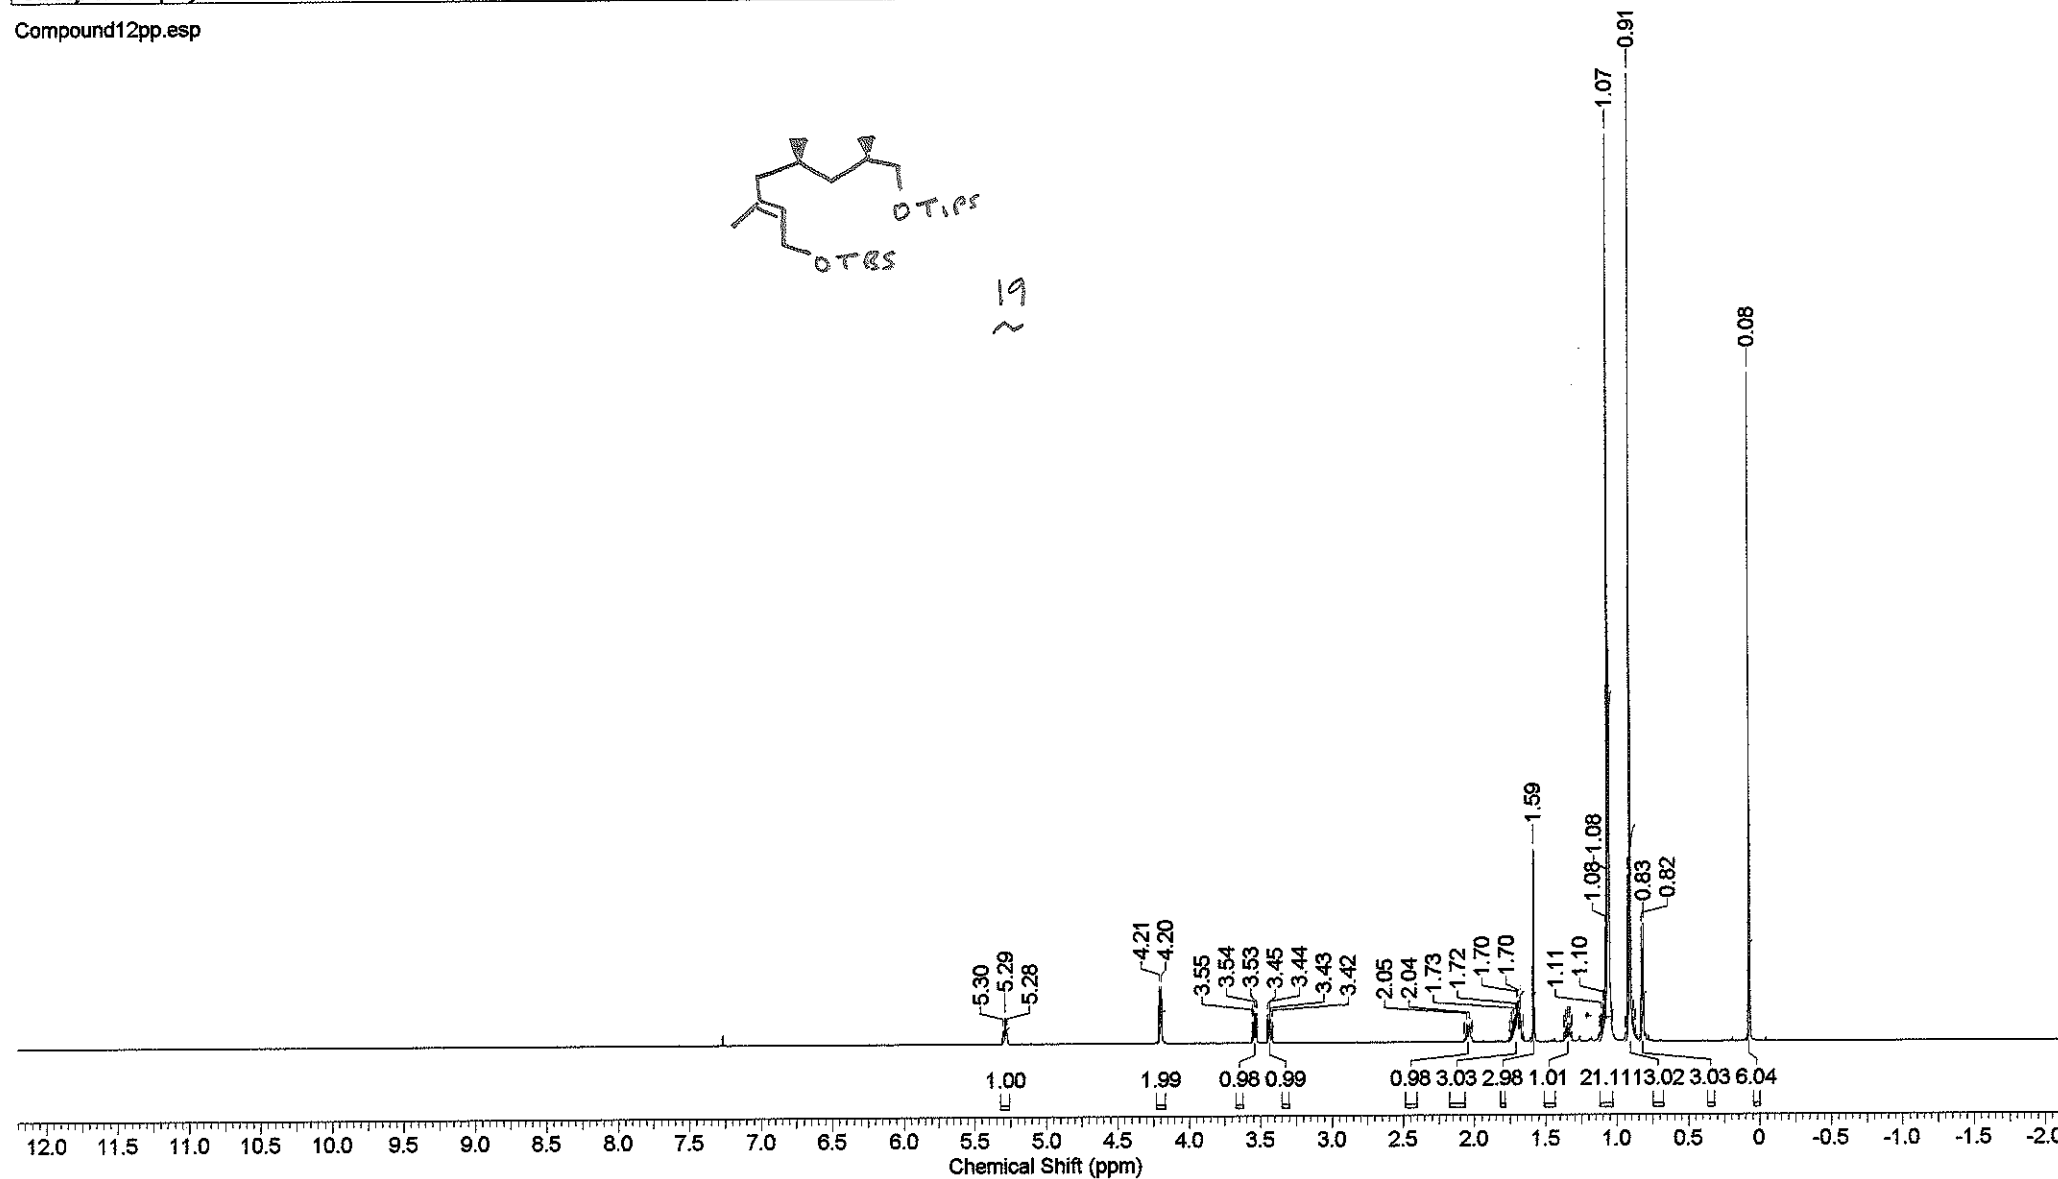

|                        |                      |                        |                                                                     |                      |                      |
|------------------------|----------------------|------------------------|---------------------------------------------------------------------|----------------------|----------------------|
| Acquisition Time (sec) | 1.1010               | Comment                | MWE086pc mCARBON CDCl3 /opt/bruk500data/2011/Mar ejt 55             | Date                 | 08 Mar 2011 11:44:00 |
| Date Stamp             | 08 Mar 2011 11:44:00 | File Name              | F:\Chemistry\Year 3 data\NMR data\Data\Compound 12\MWE082pc_000001r |                      |                      |
| Frequency (MHz)        | 125.76               | Nucleus                | 13C                                                                 | Number of Transients | 256                  |
| Original Points Count  | 32768                | Owner                  | vnmr1                                                               | Points Count         | 32768                |
| Receiver Gain          | 512.00               | SW(cyclical) (Hz)      | 29761.90                                                            | Pulse Sequence       | zgpg30               |
| Sweep Width (Hz)       | 29761.00             | Temperature (degree C) | 21.933                                                              | Solvent              | CHLOROFORM-d         |
|                        |                      |                        |                                                                     | Spectrum Offset (Hz) | 12572.9824           |

Compound12pc.esp

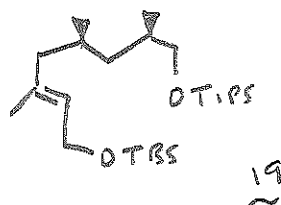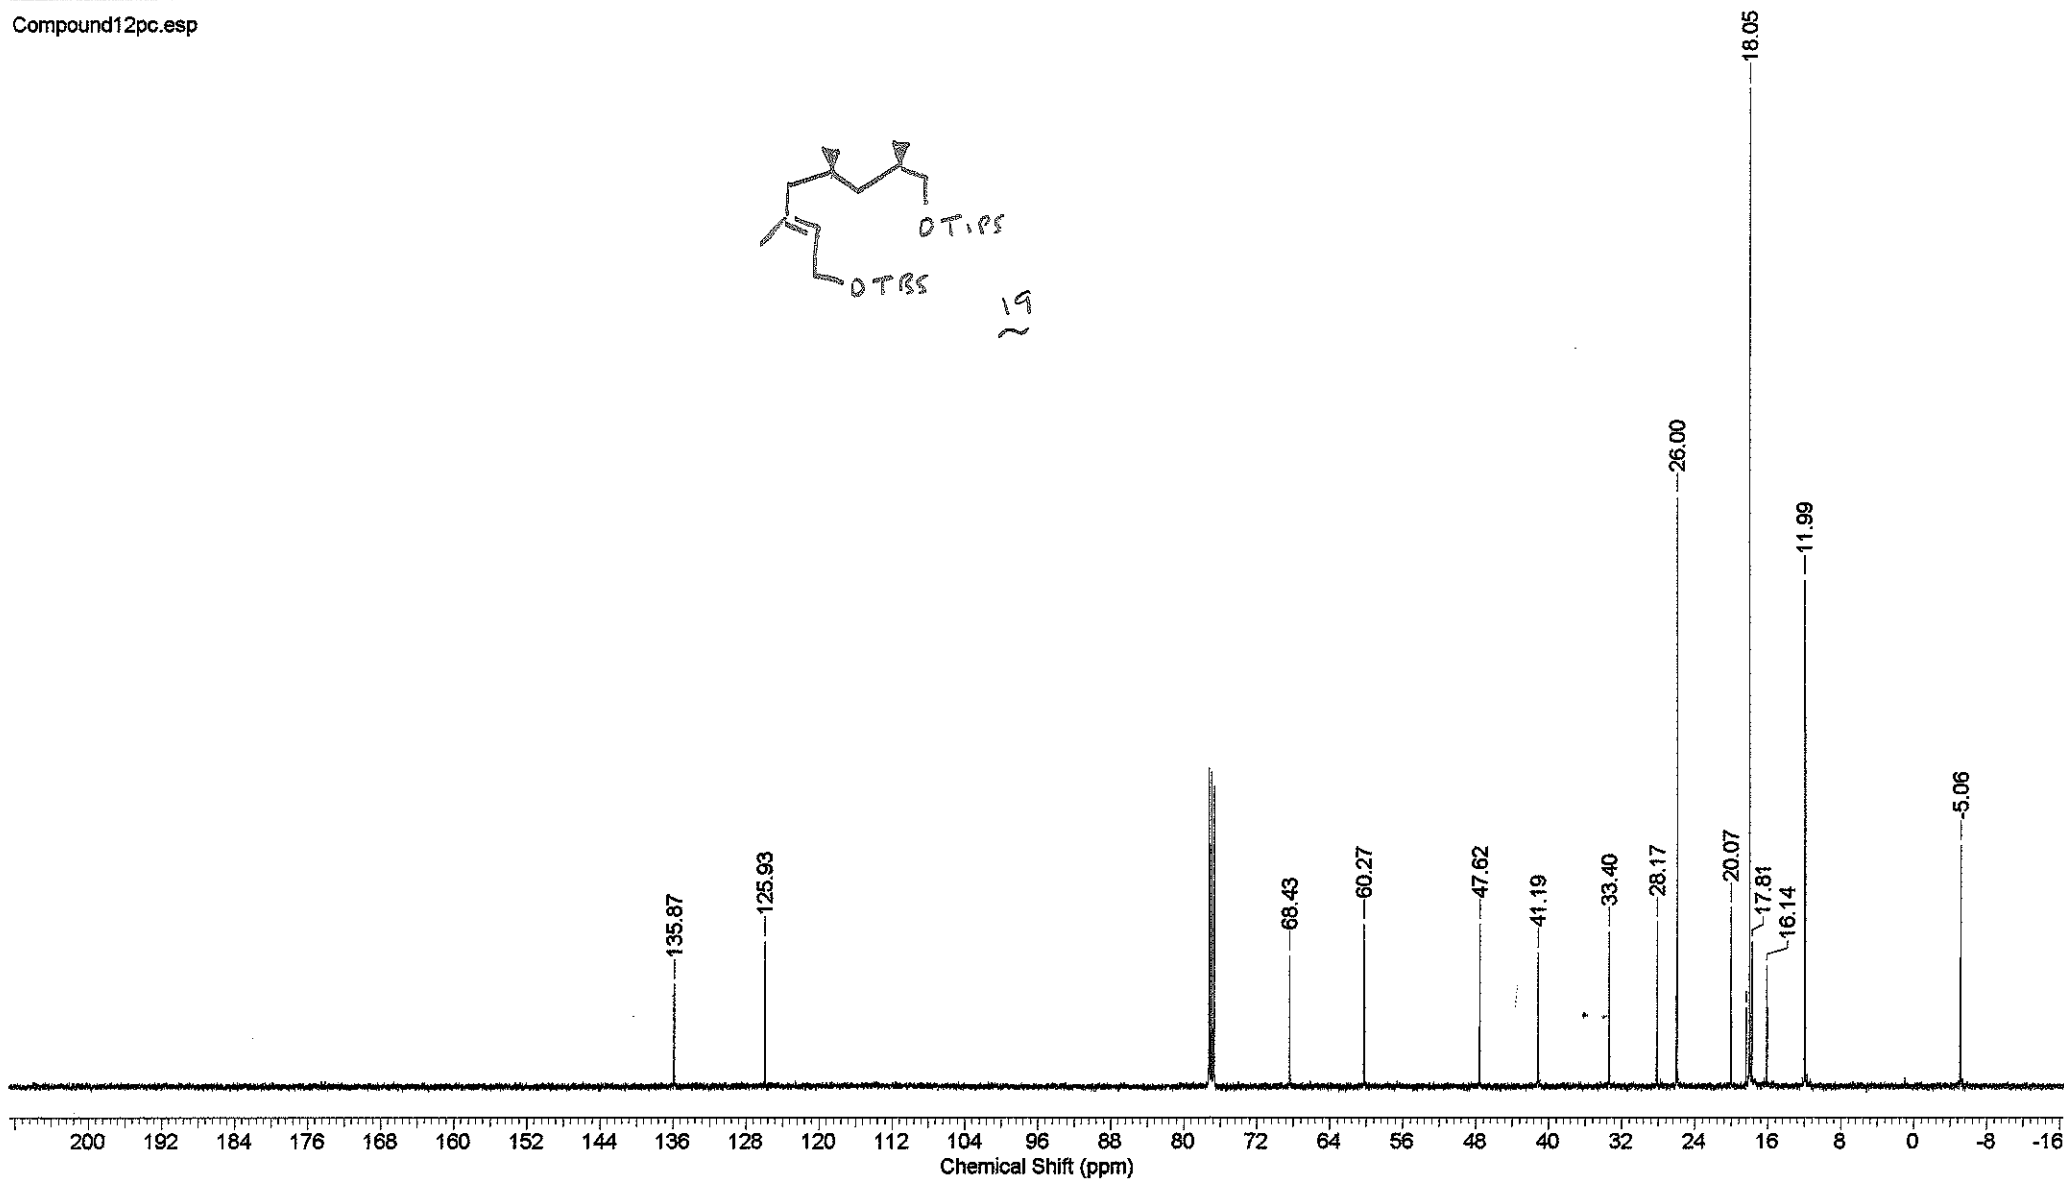

|                        |                      |                        |                                                                     |                      |                      |
|------------------------|----------------------|------------------------|---------------------------------------------------------------------|----------------------|----------------------|
| Acquisition Time (sec) | 3.9649               | Comment                | MWE087pp mPROTON CDCl3 {e:\bruk400\data\2011\Mar} ejt 15            | Date                 | 10 Mar 2011 08:42:40 |
| Date Stamp             | 10 Mar 2011 08:42:40 | File Name              | F:\Chemistry\Year 3 data\NMR data\Data\Compound 13\MWE087pp_000001r |                      |                      |
| Frequency (MHz)        | 400.13               | Nucleus                | 1H                                                                  | Number of Transients | 16                   |
| Original Points Count  | 32768                | Owner                  | Administrator                                                       | Points Count         | 32768                |
| Receiver Gain          | 90.50                | SW(cyclical) (Hz)      | 8264.46                                                             | Solvent              | CHLOROFORM-d         |
| Sweep Width (Hz)       | 8264.21              | Temperature (degree C) | 20.100                                                              | Spectrum Offset (Hz) | 2465.1794            |

Compound13pp.esp

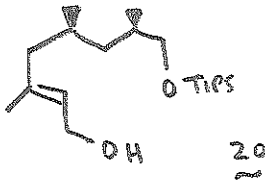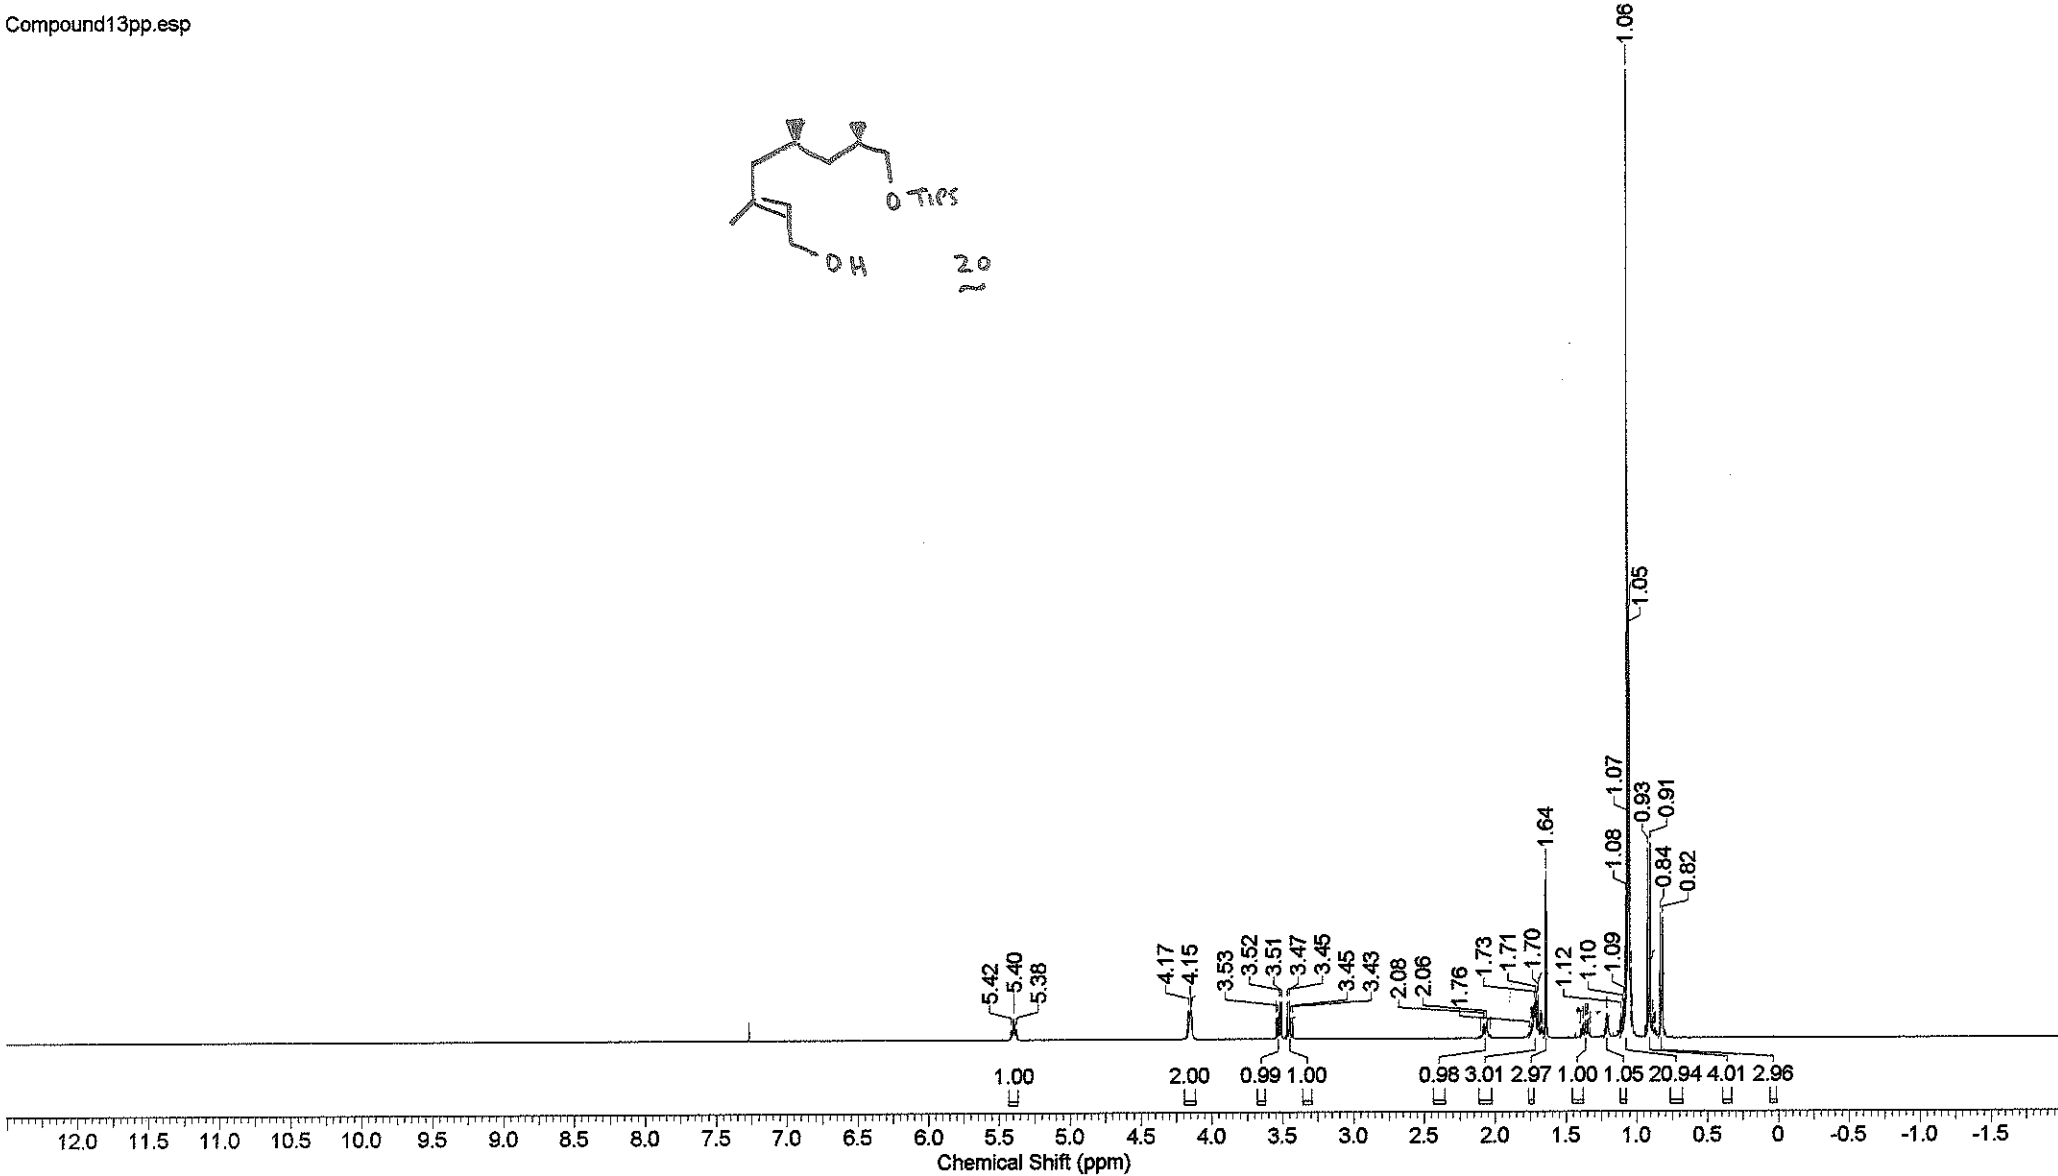

|                        |                      |                        |                                                                     |                      |                      |
|------------------------|----------------------|------------------------|---------------------------------------------------------------------|----------------------|----------------------|
| Acquisition Time (sec) | 1.0835               | Comment                | MWE087pc mCARBON CDCl3 {e:\bruk400data\2011\Mar} ejt 15             | Date                 | 10 Mar 2011 09:06:08 |
| Date Stamp             | 10 Mar 2011 09:06:08 | File Name              | F:\Chemistry\Year 3 data\NMR data\Data\Compound 13\MWE087pc_000001r |                      |                      |
| Frequency (MHz)        | 100.61               | Nucleus                | 13C                                                                 | Number of Transients | 256                  |
| Original Points Count  | 32768                | Owner                  | Administrator                                                       | Points Count         | 32768                |
| Receiver Gain          | 512.00               | SW(cyclical) (Hz)      | 30241.94                                                            | Pulse Sequence       | zgpg30               |
| Sweep Width (Hz)       | 30241.01             | Temperature (degree C) | 20.700                                                              | Solvent              | CHLOROFORM-d         |
|                        |                      |                        |                                                                     | Spectrum Offset (Hz) | 11332.2295           |

Compound13pc.esp

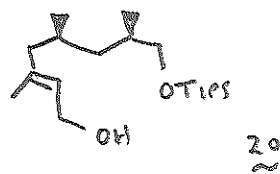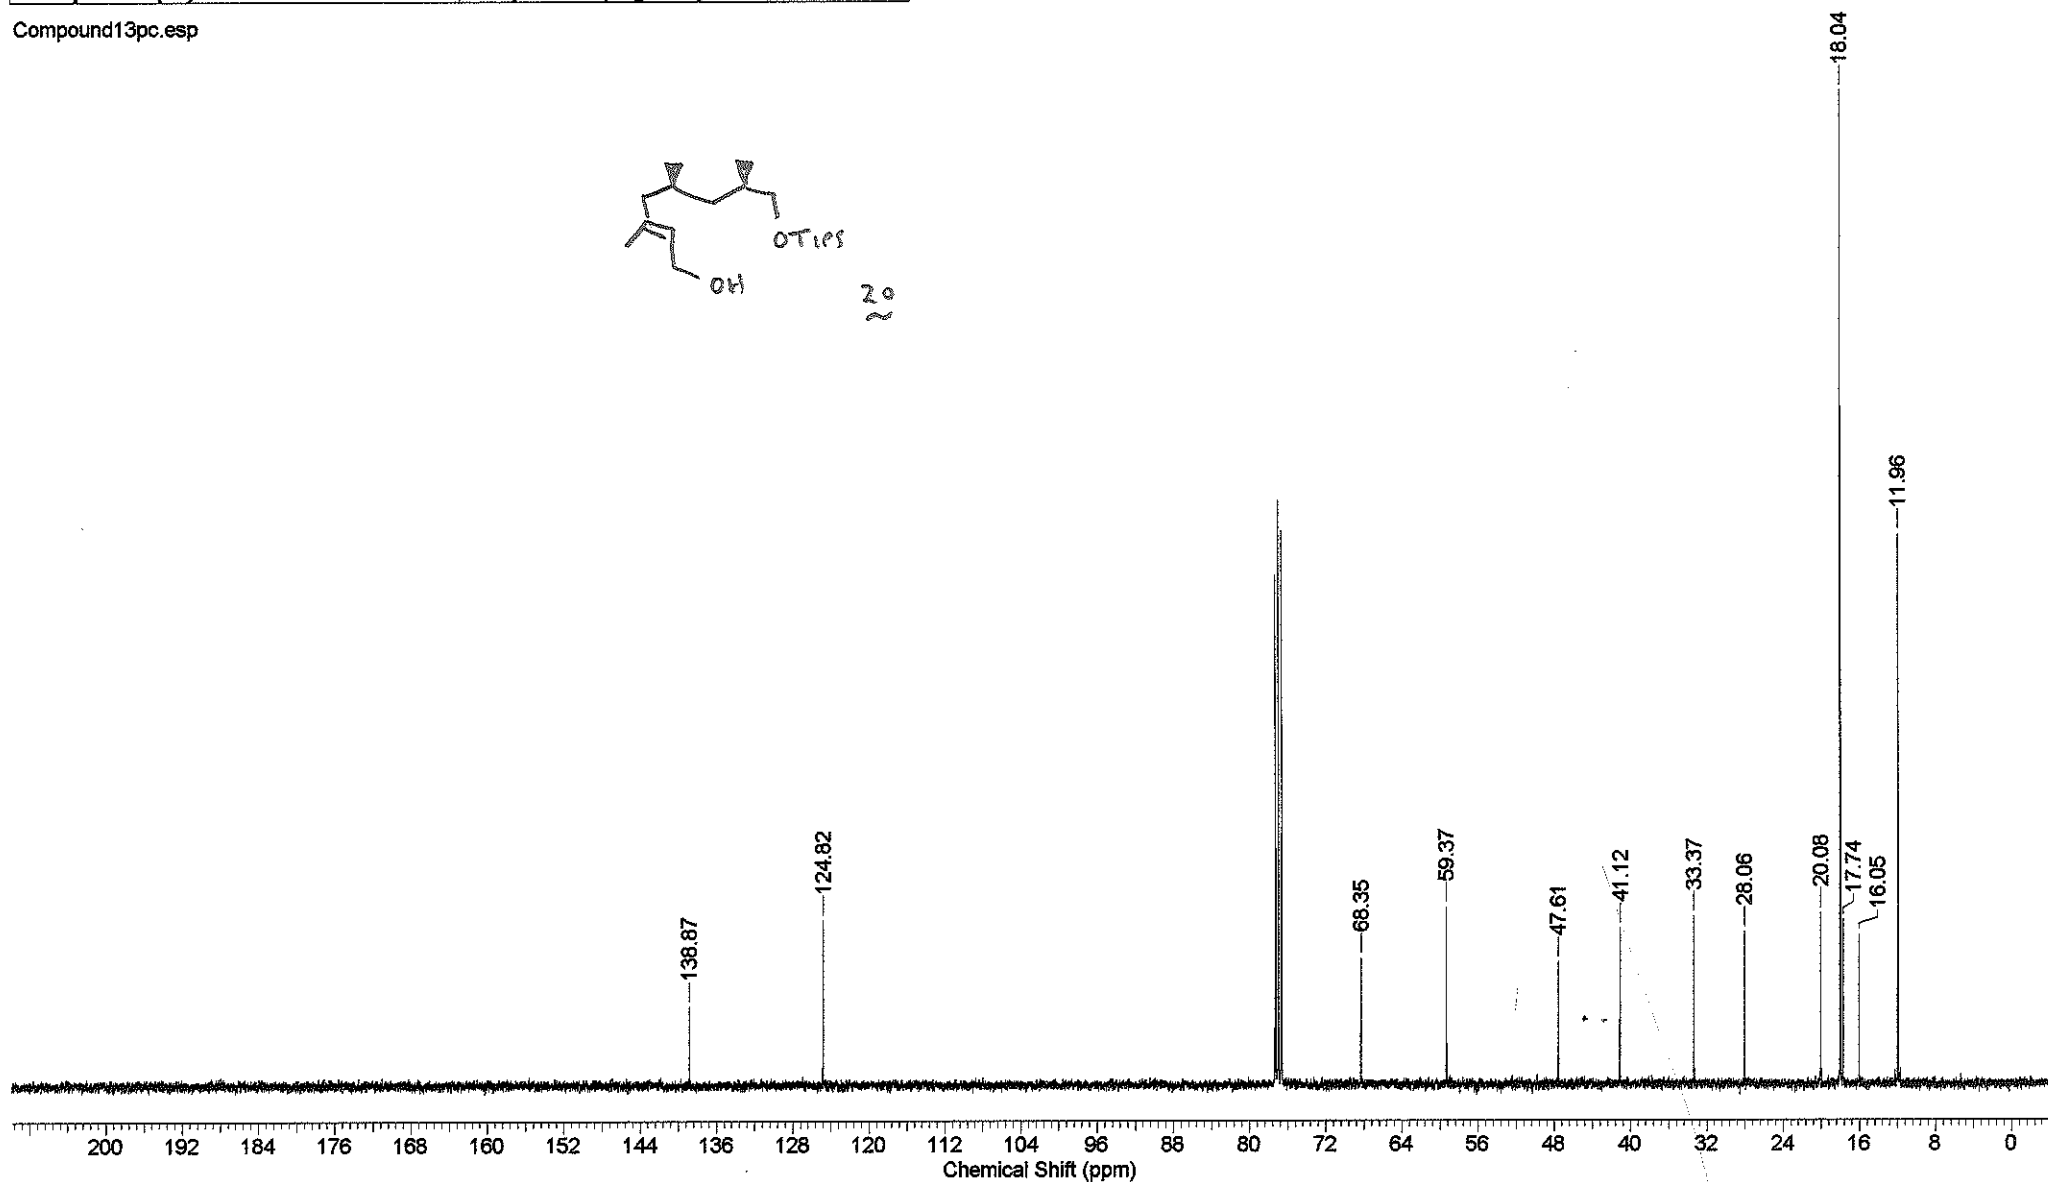

CCCCC(=O)OCC1=CC=CC=C1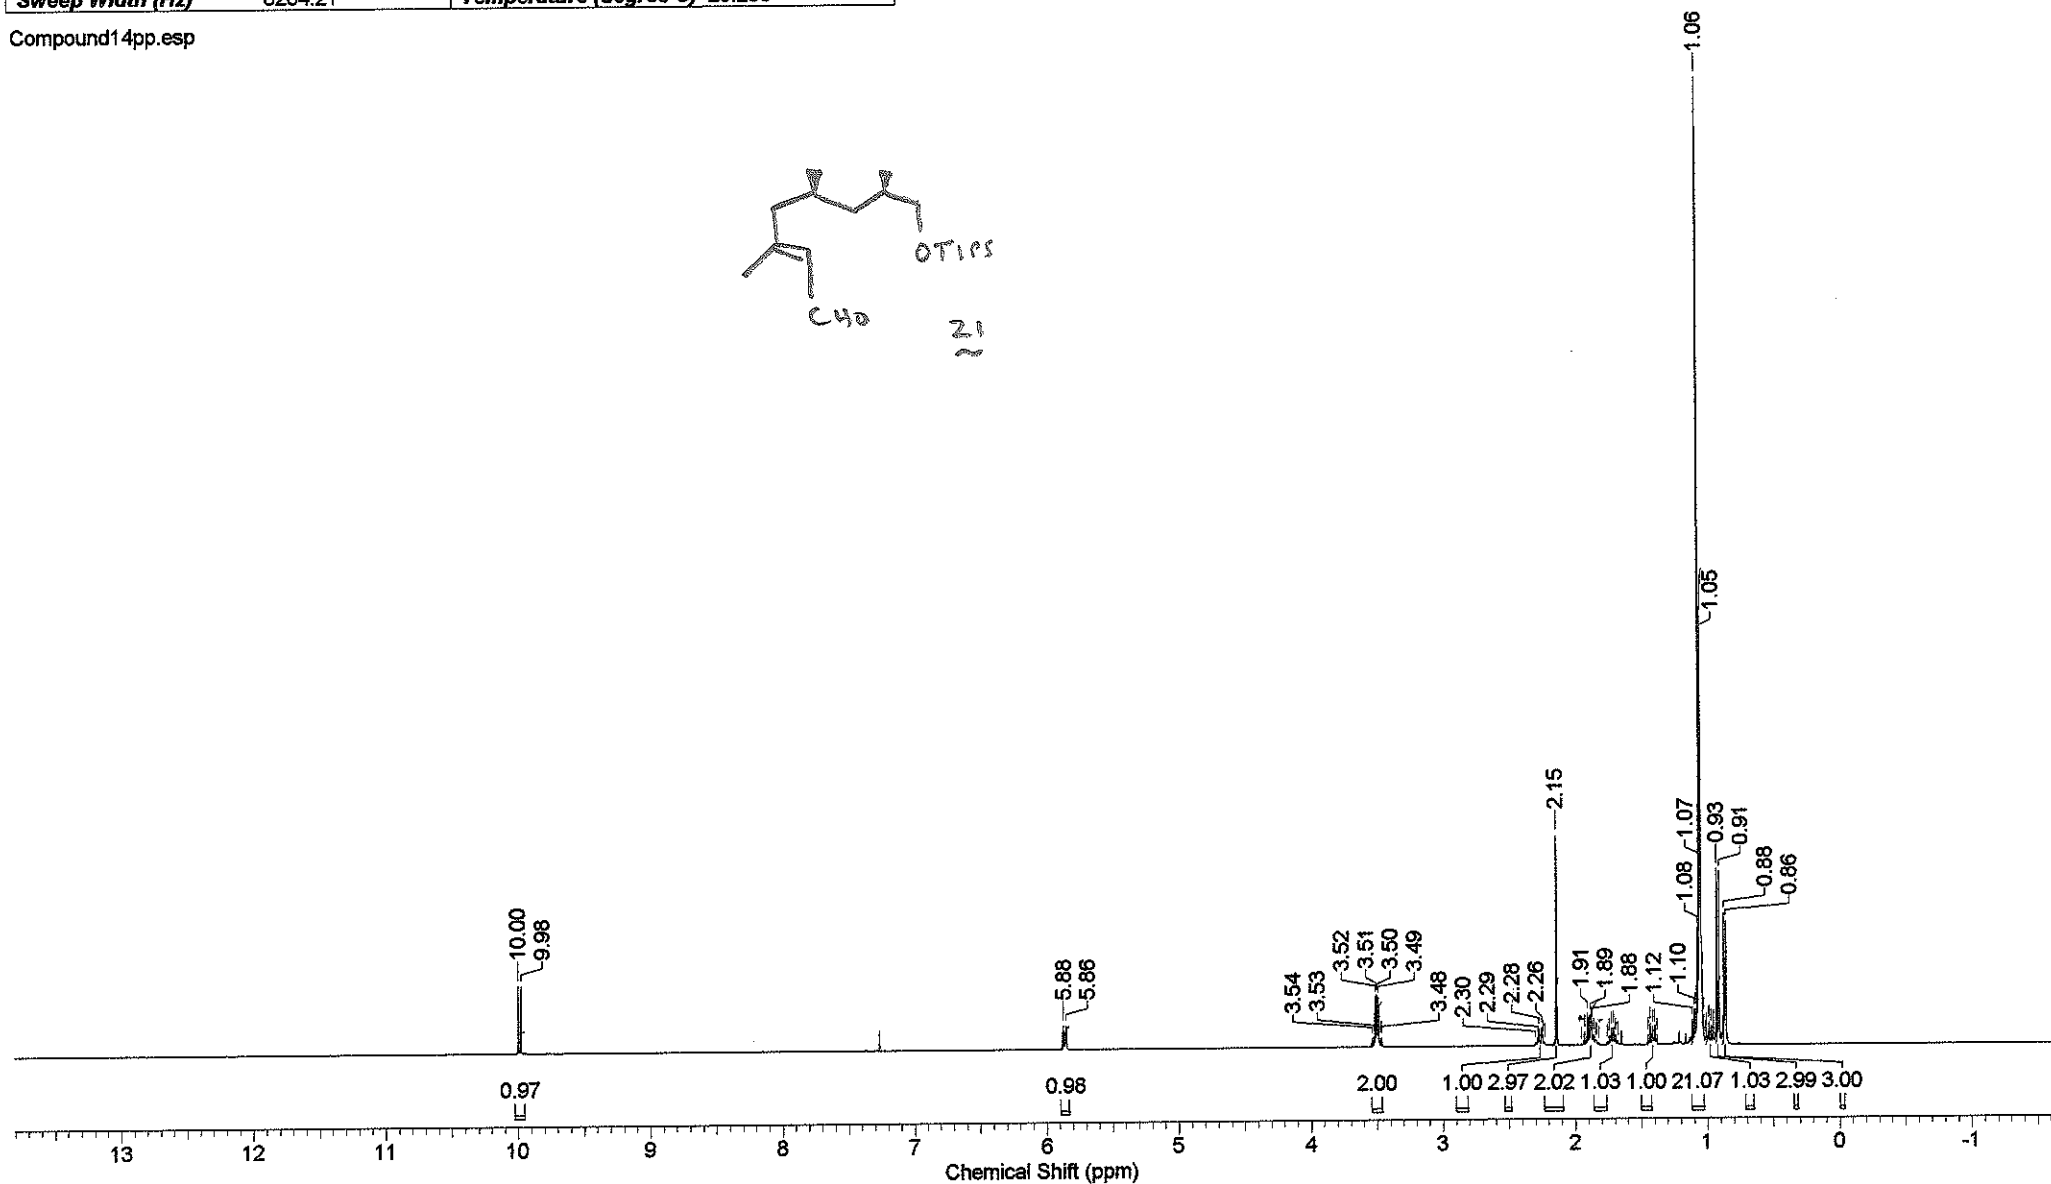



|                        |                      |                        |                                                                     |                      |                      |
|------------------------|----------------------|------------------------|---------------------------------------------------------------------|----------------------|----------------------|
| Acquisition Time (sec) | 1.0835               | Comment                | MWE089pc mCARBON CDCl3 [e:\bruk400data\2011\Mar] ejt 7              | Date                 | 11 Mar 2011 09:25:20 |
| Date Stamp             | 11 Mar 2011 09:25:20 | File Name              | F:\Chemistry\Year 3 data\NMR data\Data\Compound 14\MWE089pc_000001r |                      |                      |
| Frequency (MHz)        | 100.61               | Nucleus                | 13C                                                                 | Number of Transients | 256                  |
| Original Points Count  | 32768                | Owner                  | Administrator                                                       | Points Count         | 32768                |
| Receiver Gain          | 512.00               | SW(cyclical) (Hz)      | 30241.94                                                            | Pulse Sequence       | zgpg30               |
| Sweep Width (Hz)       | 30241.01             | Temperature (degree C) | 20.800                                                              | Solvent              | CHLOROFORM-d         |
|                        |                      |                        |                                                                     | Spectrum Offset (Hz) | 11332.2295           |

Compound14pc.esp

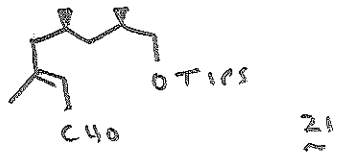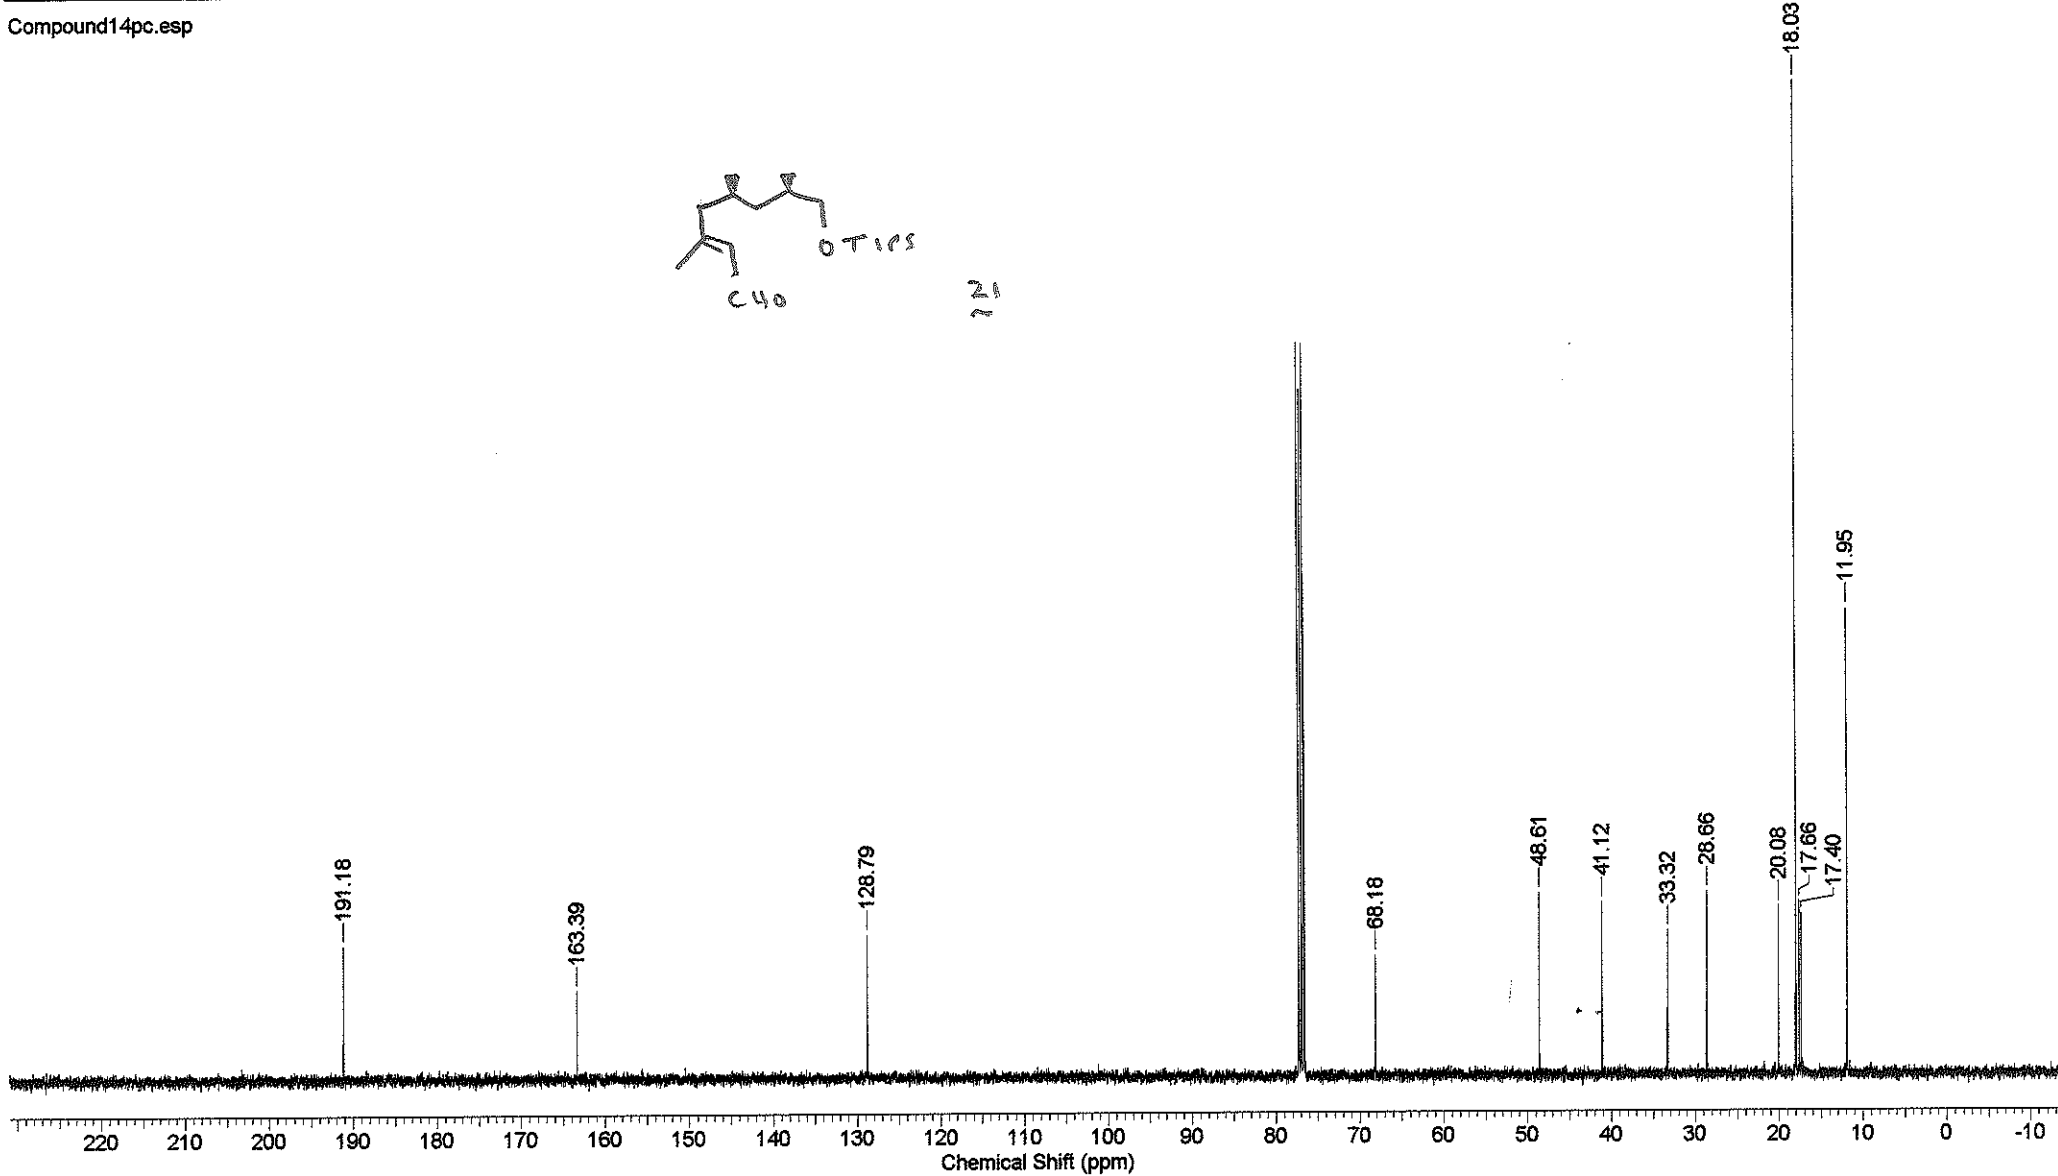

C[C@H](OC(=O)C=C(C)[C@@H](O)CC)[C@H](O)CC  
22  
~
$$(6E, 8E, 10E) : (6E, 8Z, 10E) :$$
$$(6E, 8E, 10Z) = 91:5:4$$
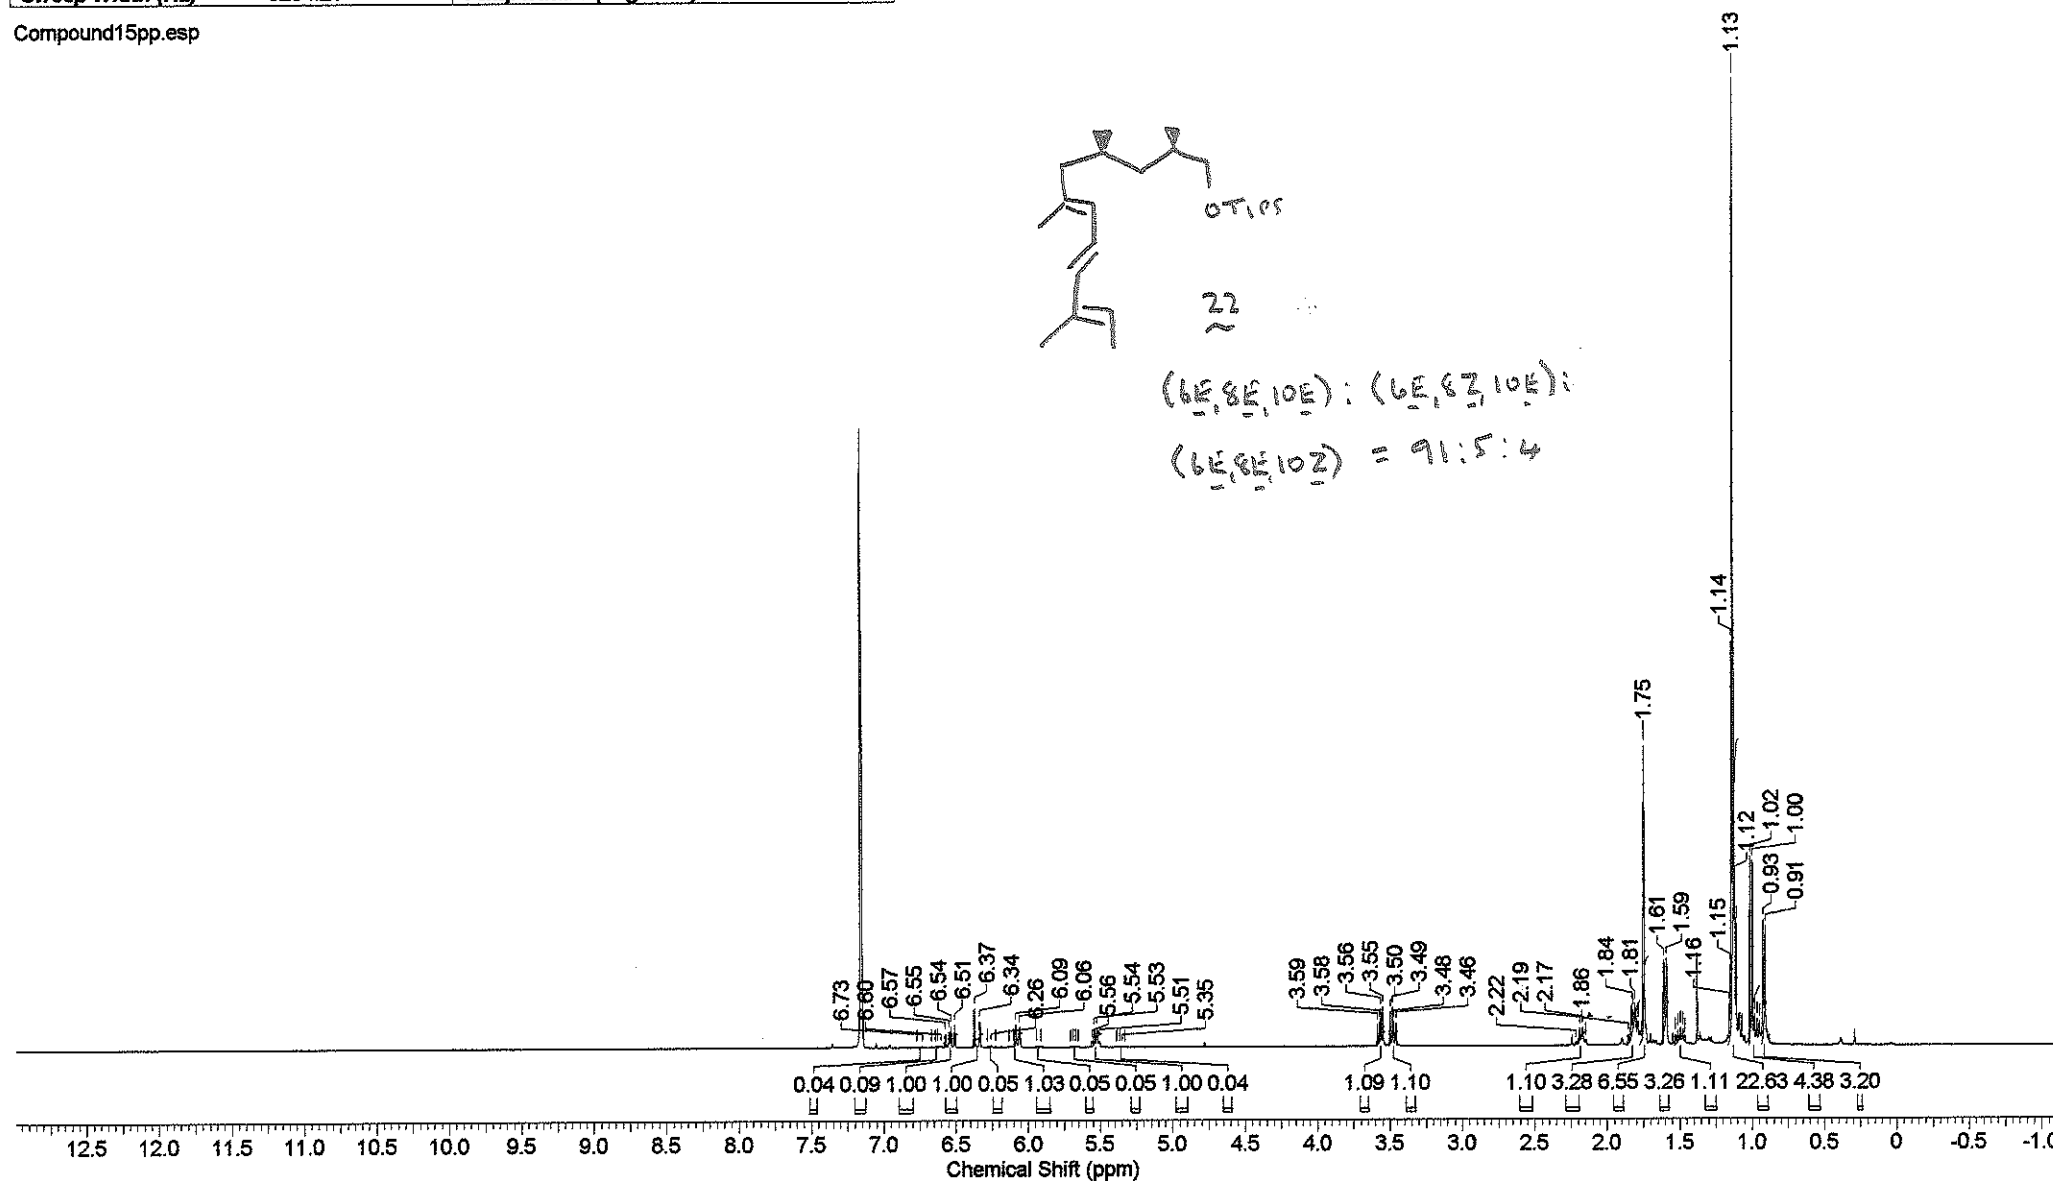

|                        |                      |                        |                                                                     |                      |                      |
|------------------------|----------------------|------------------------|---------------------------------------------------------------------|----------------------|----------------------|
| Acquisition Time (sec) | 3.9649               | Comment                | MWF010pp mPROTON C6D6 {e:\bruk400data\2011\Apr\} ejt 41             | Date                 | 14 Apr 2011 09:57:20 |
| Date Stamp             | 14 Apr 2011 09:57:20 | File Name              | F:\Chemistry\Year 3 data\NMR data\Data\Compound 15\MWF010pp_000001r |                      |                      |
| Frequency (MHz)        | 400.13               | Nucleus                | <sup>1</sup> H                                                      | Number of Transients | 16                   |
| Original Points Count  | 32768                | Owner                  | Administrator                                                       | Points Count         | 32768                |
| Receiver Gain          | 203.00               | SW(cyclical) (Hz)      | 8264.46                                                             | Solvent              | BENZENE-d6           |
| Sweep Width (Hz)       | 8264.21              | Temperature (degree C) | 21.600                                                              | Pulse Sequence       | zg30b                |
|                        |                      |                        |                                                                     | Spectrum Offset (Hz) | 2425.7051            |

Compound15pp.esp

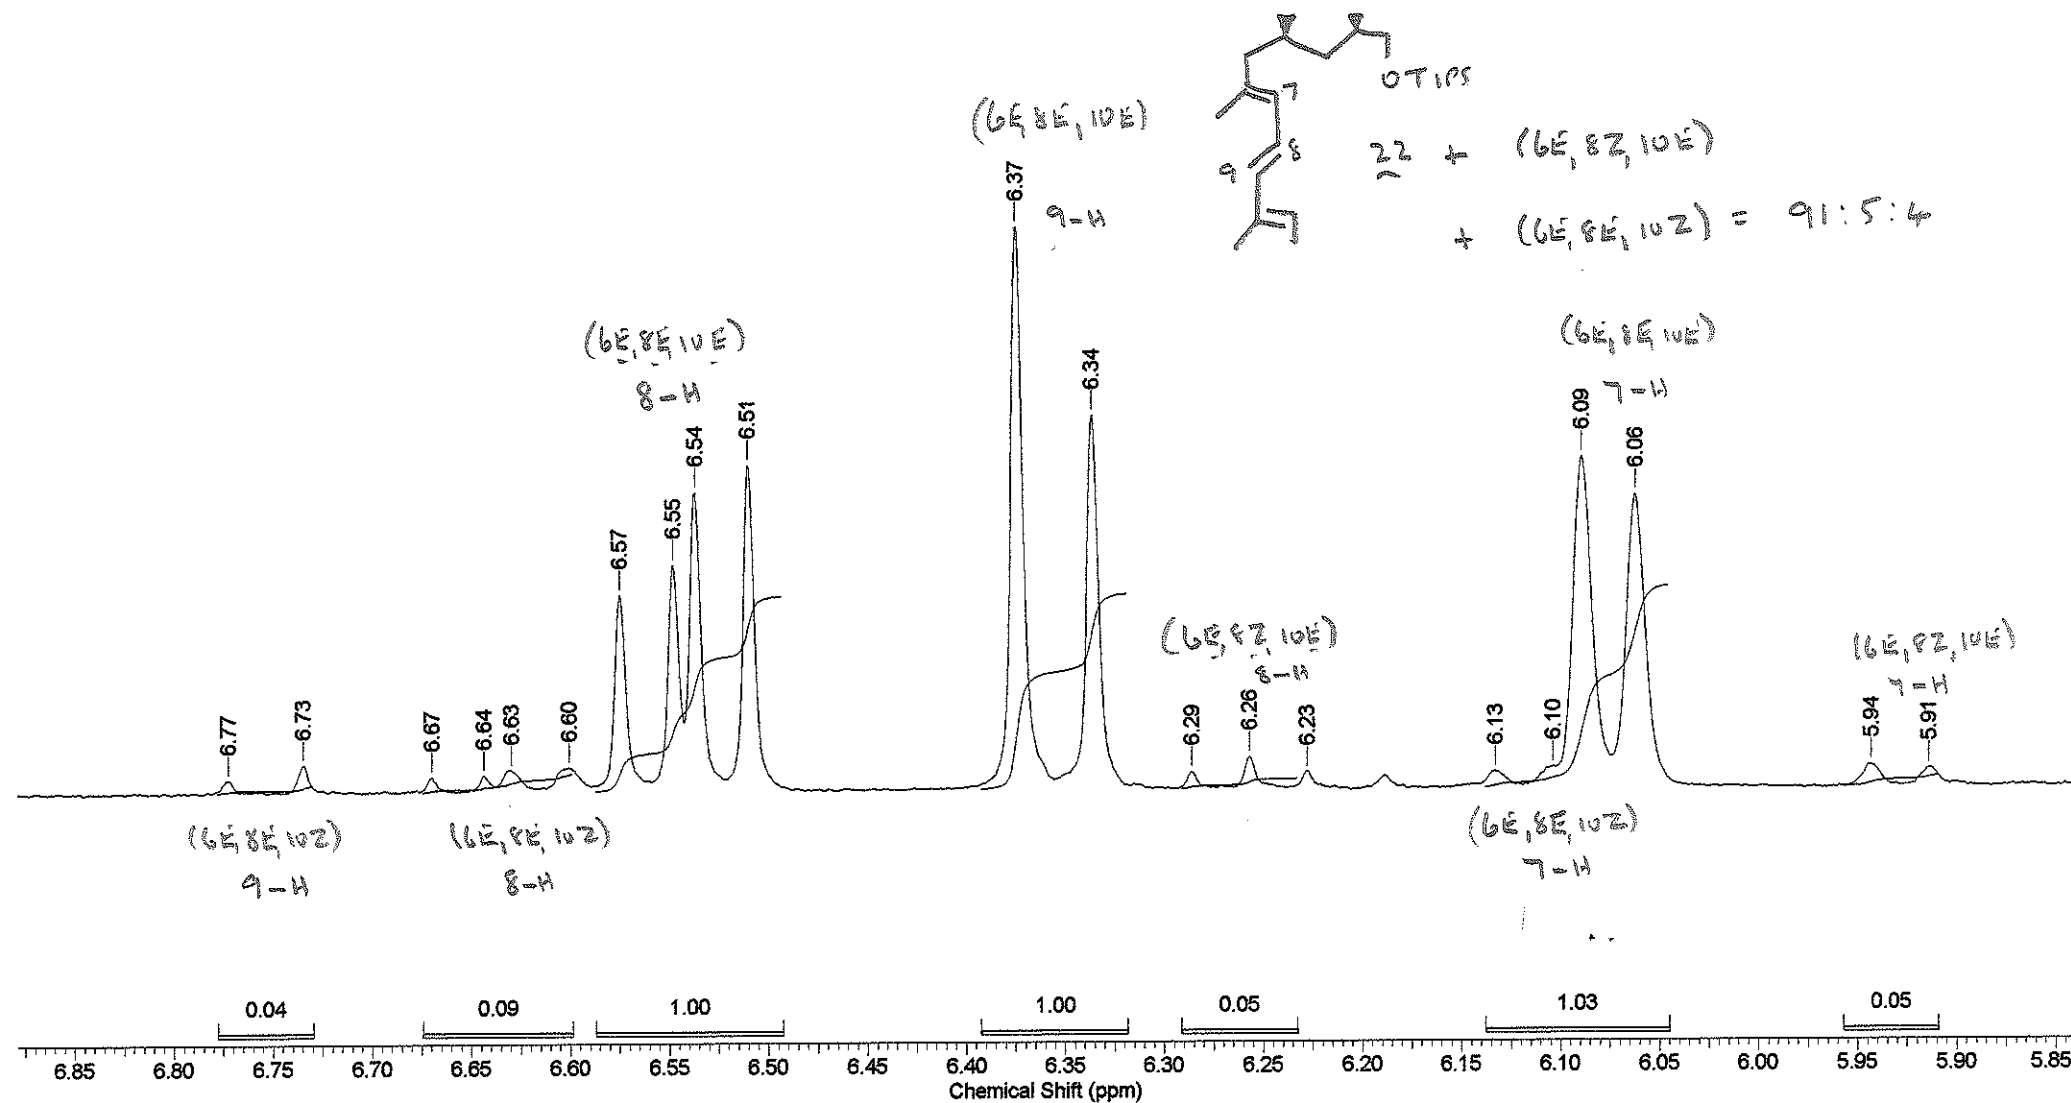

|                        |                      |                        |                                                                     |                      |                      |
|------------------------|----------------------|------------------------|---------------------------------------------------------------------|----------------------|----------------------|
| Acquisition Time (sec) | 1.0835               | Comment                | mCARBON C6D6 {e:\bruk400data\2011\Apr} ejt 45                       | Date                 | 14 Apr 2011 11:41:52 |
| Date Stamp             | 14 Apr 2011 11:41:52 | File Name              | F:\Chemistry\Year 3 data\NMR data\Data\Compound 15\MWF010pc_000001r |                      |                      |
| Frequency (MHz)        | 100.61               | Nucleus                | 13C                                                                 | Number of Transients | 256                  |
| Original Points Count  | 32768                | Owner                  | Administrator                                                       | Points Count         | 32768                |
| Receiver Gain          | 512.00               | SW(cyclical) (Hz)      | 30241.94                                                            | Pulse Sequence       | zgpg30               |
| Sweep Width (Hz)       | 30241.01             | Temperature (degree C) | 22.400                                                              | Spectrum Offset (Hz) | 11394.4072           |

Compound15pc.esp

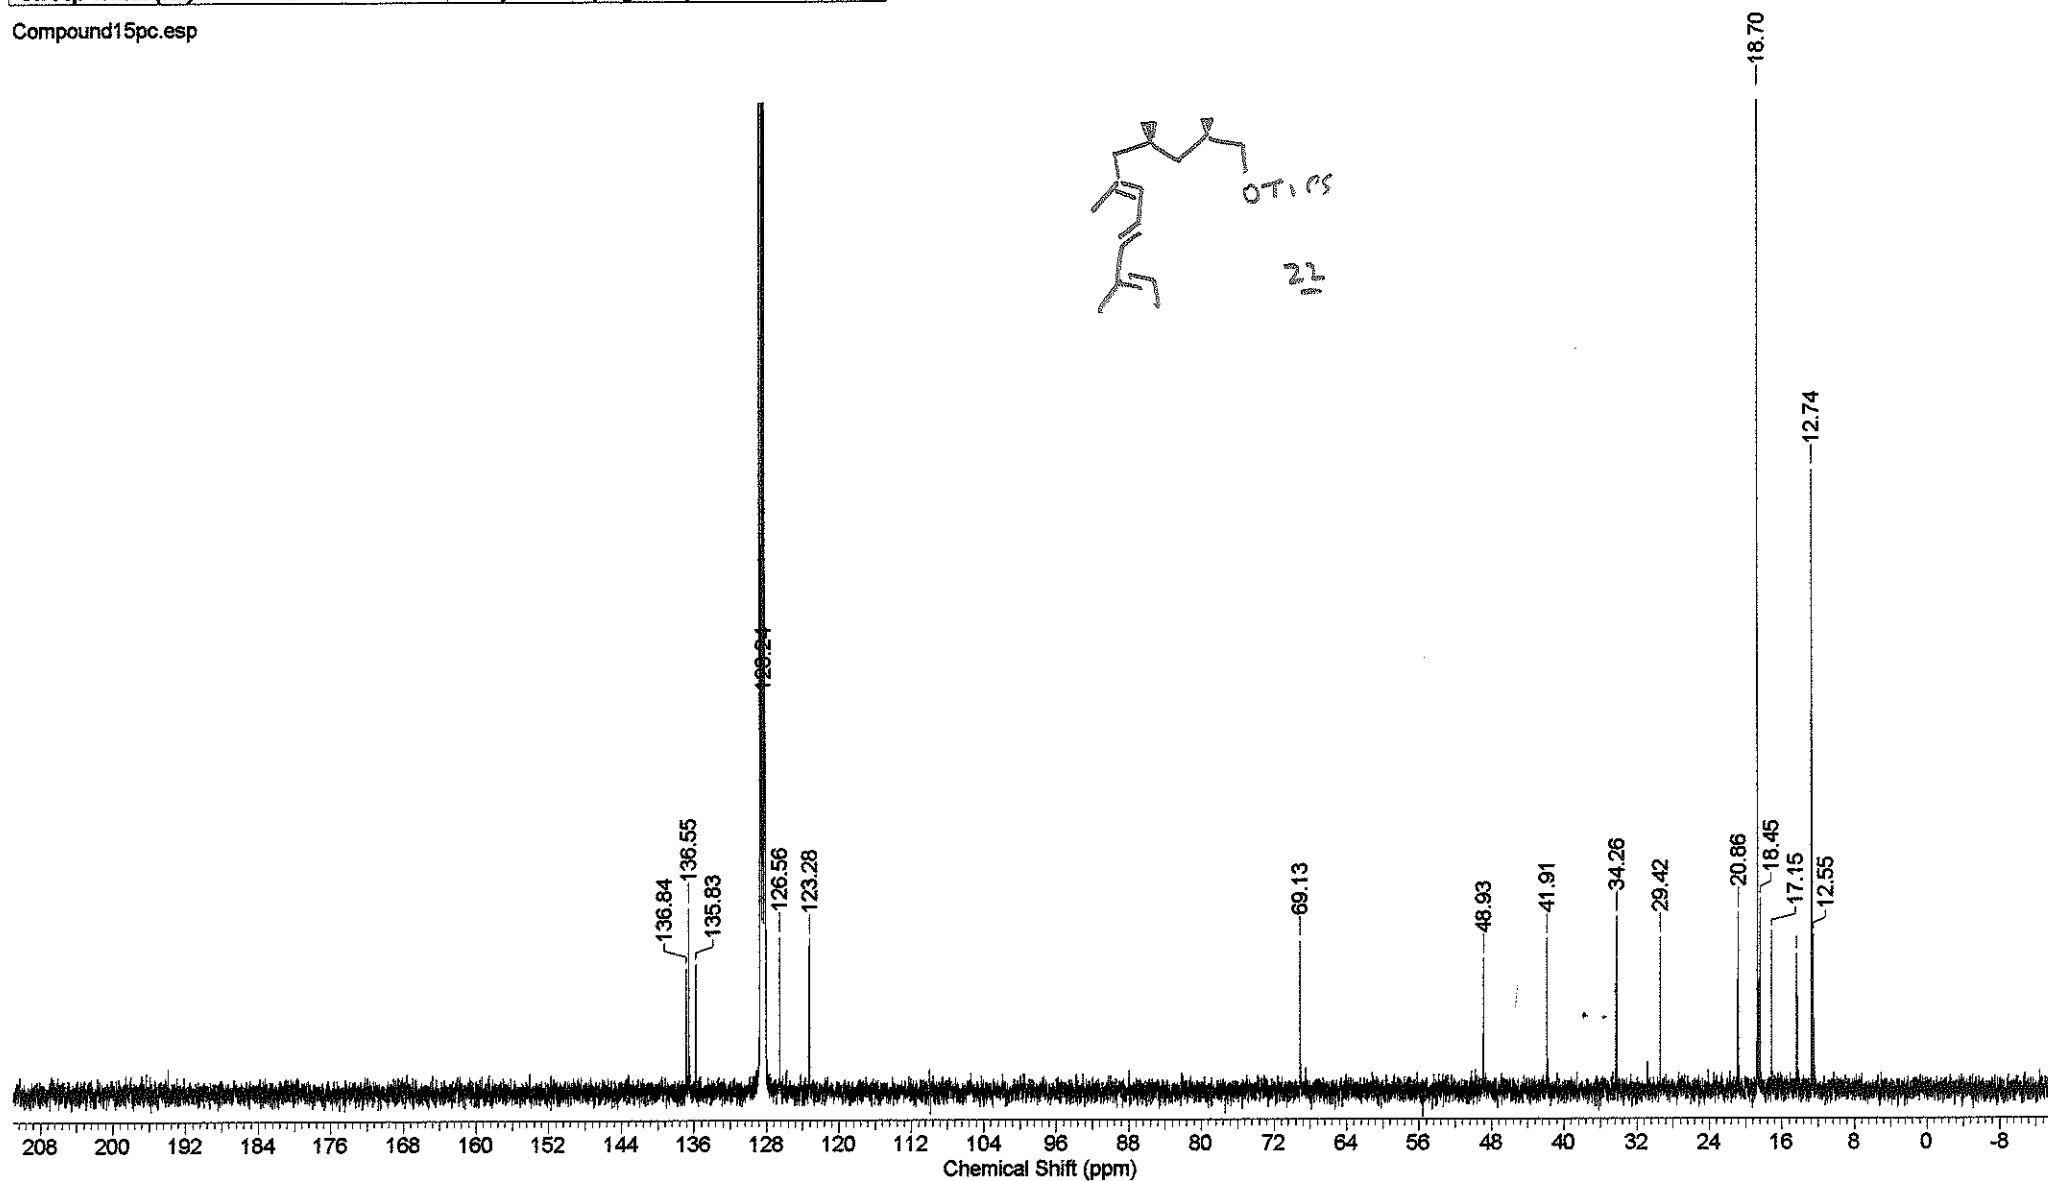

|                        |                      |                        |                                                                    |                      |                      |
|------------------------|----------------------|------------------------|--------------------------------------------------------------------|----------------------|----------------------|
| Acquisition Time (sec) | 3.9649               | Comment                | MWB066pp mPROTON CDCl3 {e:\bruk400data\2011\Feb} ejt 25            | Date                 | 01 Feb 2011 09:44:32 |
| Date Stamp             | 01 Feb 2011 09:44:32 | File Name              | F:\Chemistry\Year 1 data\NMR data\Data\Compound30\MWB066pp_000001r |                      |                      |
| Frequency (MHz)        | 400.13               | Nucleus                | 1H                                                                 | Number of Transients | 16                   |
| Original Points Count  | 32768                | Owner                  | Administrator                                                      | Points Count         | 32768                |
| Receiver Gain          | 128.00               | SW(cyclical) (Hz)      | 8264.46                                                            | Solvent              | CHLOROFORM-d         |
| Sweep Width (Hz)       | 8264.21              | Temperature (degree C) | 19.400                                                             | Spectrum Offset (Hz) | 2465.4316            |

Compound30pp.esp

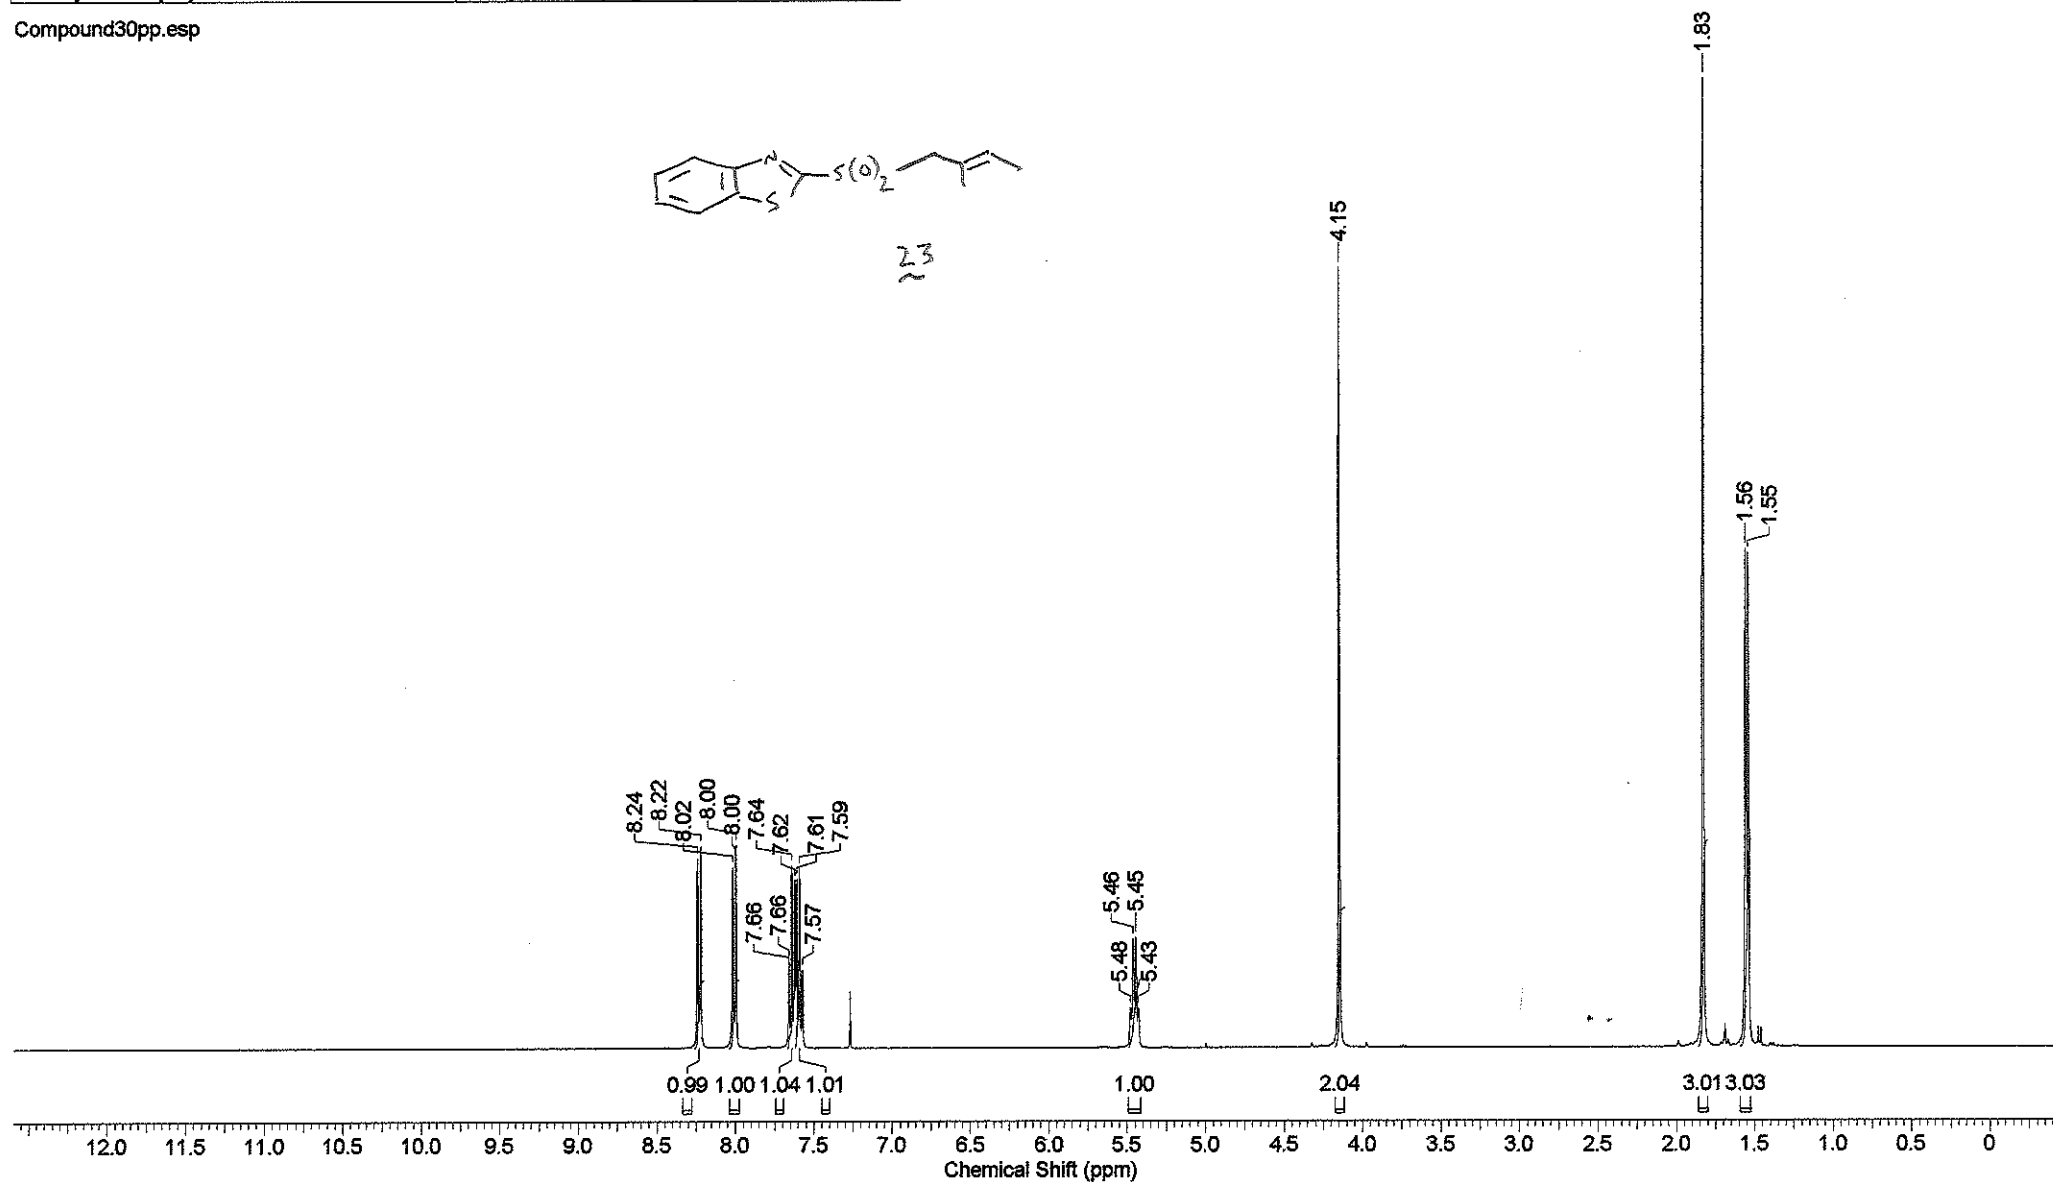

|                               |                      |                               |                                                                    |                             |                      |
|-------------------------------|----------------------|-------------------------------|--------------------------------------------------------------------|-----------------------------|----------------------|
| <b>Acquisition Time (sec)</b> | 1.1010               | <b>Comment</b>                | MWC066pc mCARBON CDCl3 /opt/bruk500data/2011/Jan ejt 6             | <b>Date</b>                 | 01 Feb 2011 08:40:32 |
| <b>Date Stamp</b>             | 01 Feb 2011 08:40:32 | <b>File Name</b>              | F:\Chemistry\Year 1 data\NMR data\Data\Compound30\MWB066pc_000001r |                             |                      |
| <b>Frequency (MHz)</b>        | 125.76               | <b>Nucleus</b>                | 13C                                                                | <b>Number of Transients</b> | 256                  |
| <b>Original Points Count</b>  | 32768                | <b>Owner</b>                  | vnmr1                                                              | <b>Points Count</b>         | 32768                |
| <b>Receiver Gain</b>          | 512.00               | <b>SW(cyclical) (Hz)</b>      | 29761.90                                                           | <b>Solvent</b>              | CHLOROFORM-d         |
| <b>Sweep Width (Hz)</b>       | 29761.00             | <b>Temperature (degree C)</b> | 20.750                                                             | <b>Pulse Sequence</b>       | zgpg30               |
|                               |                      |                               |                                                                    | <b>Spectrum Offset (Hz)</b> | 12564.8096           |

Compound30pc.esp

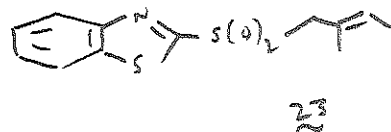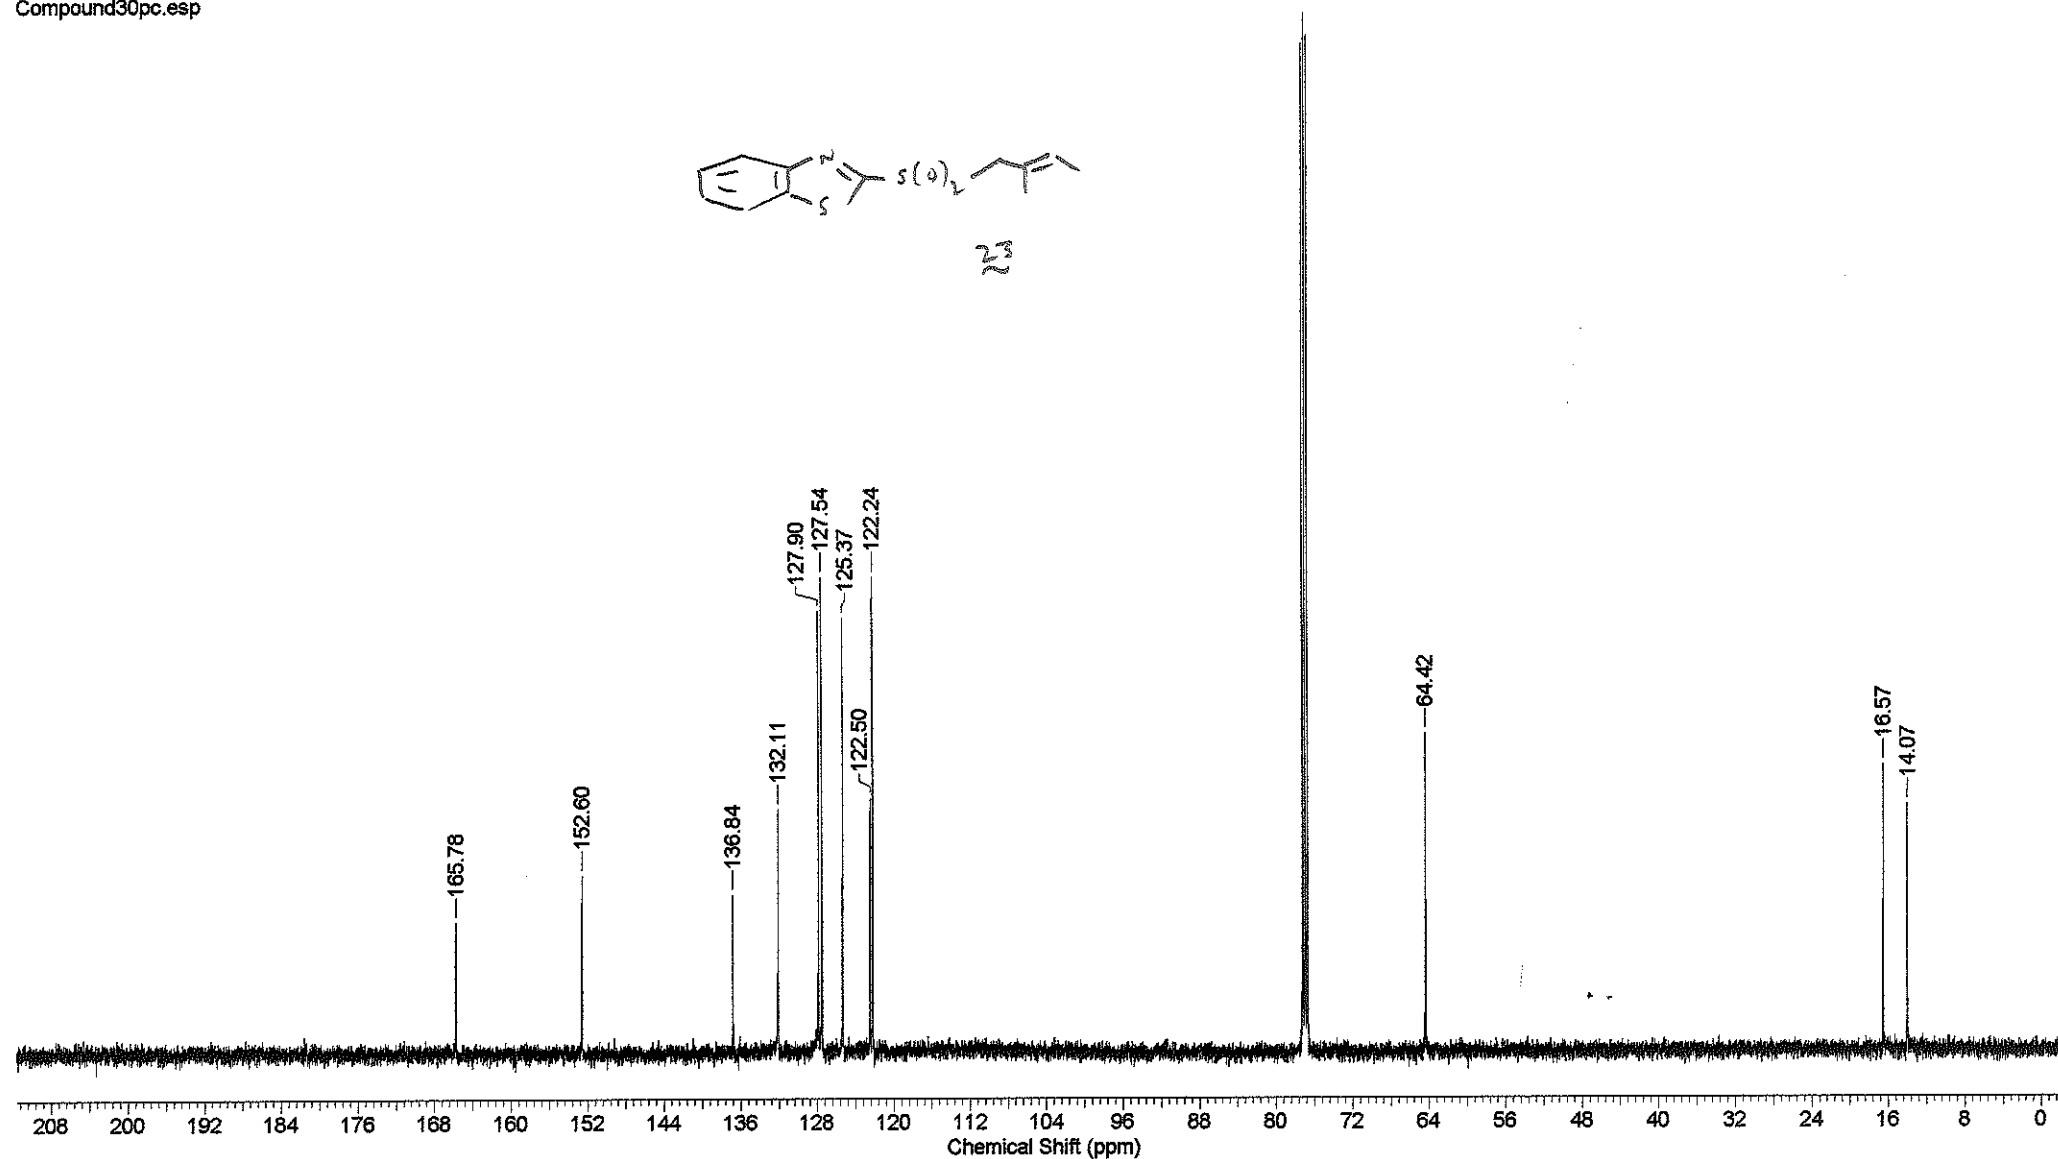

|                        |                      |                        |                                                                   |                      |                      |
|------------------------|----------------------|------------------------|-------------------------------------------------------------------|----------------------|----------------------|
| Acquisition Time (sec) | 3.9649               | Comment                | MWC057pp mPROTON CDCl3 {e:\bruk400data\2009\Dec} ejt 22           | Date                 | 04 Dec 2009 10:16:32 |
| Date Stamp             | 04 Dec 2009 10:16:32 | File Name              | F:\Chemistry\Year 2 data\NMR data\Data\Compound1\MWC057pp_000001r |                      |                      |
| Frequency (MHz)        | 400.13               | Nucleus                | 1H                                                                | Number of Transients | 16                   |
| Original Points Count  | 32768                | Owner                  | Administrator                                                     | Points Count         | 32768                |
| Receiver Gain          | 90.50                | SW(cyclical) (Hz)      | 8264.46                                                           | Solvent              | CHLOROFORM-d         |
| Sweep Width (Hz)       | 8264.21              | Temperature (degree C) | 19.400                                                            | Spectrum Offset (Hz) | 2470.9661            |

Compound1pp.esp

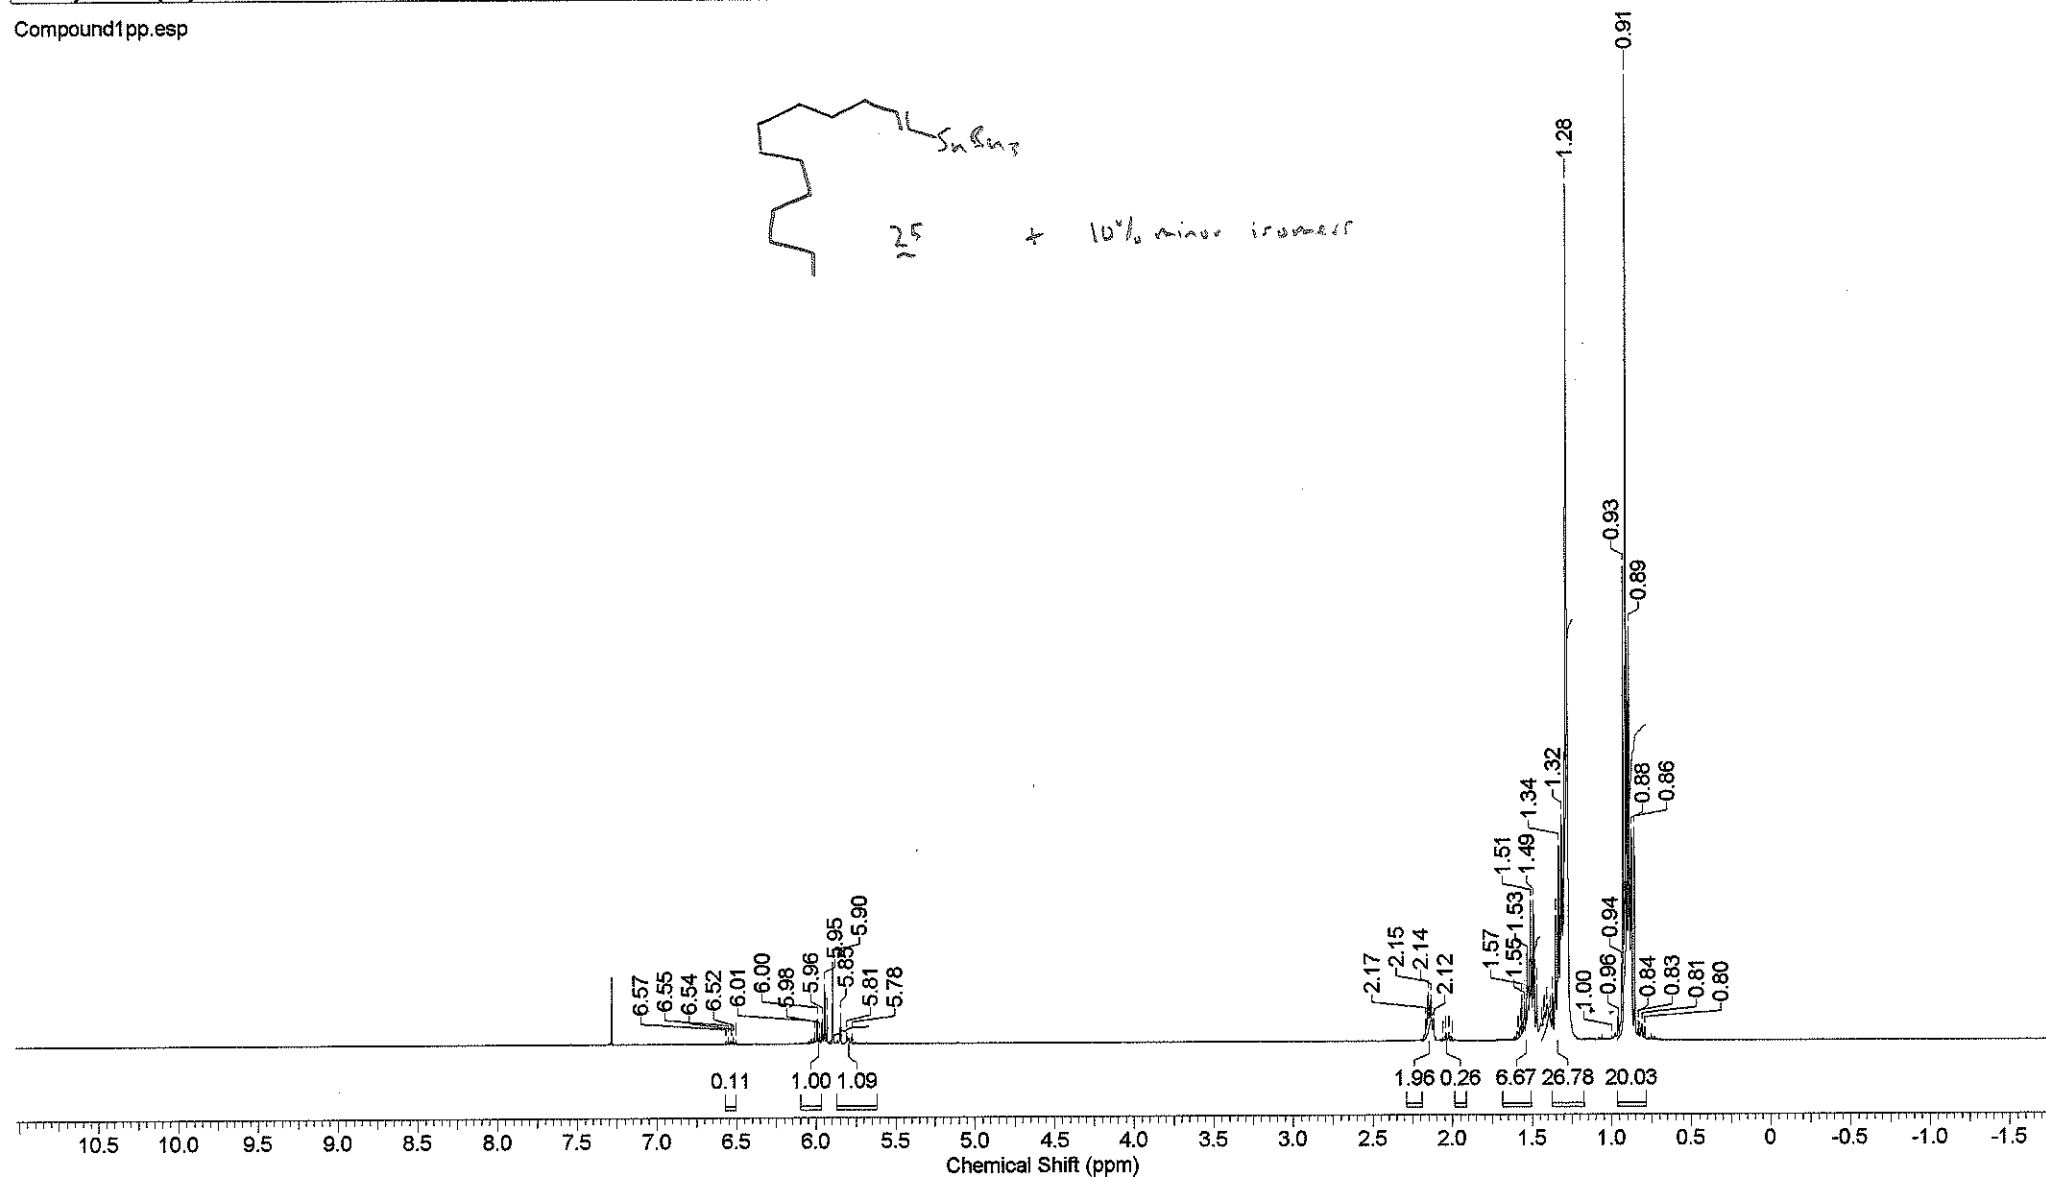

|                        |                      |                        |                                                                   |                      |                      |
|------------------------|----------------------|------------------------|-------------------------------------------------------------------|----------------------|----------------------|
| Acquisition Time (sec) | 1.0835               | Comment                | MWC057pc mCARBON CDCl3 {e:\bruk400data\2009\Dec} ejt 48           | Date                 | 04 Dec 2009 13:17:52 |
| Date Stamp             | 04 Dec 2009 13:17:52 | File Name              | F:\Chemistry\Year 2 data\NMR data\Data\Compound1\MWC057pc_000001r |                      |                      |
| Frequency (MHz)        | 100.61               | Nucleus                | 13C                                                               | Number of Transients | 256                  |
| Original Points Count  | 32768                | Owner                  | Administrator                                                     | Points Count         | 32768                |
| Receiver Gain          | 512.00               | SW(cyclical) (Hz)      | 30241.94                                                          | Solvent              | CHLOROFORM-d         |
| Sweep Width (Hz)       | 30241.01             | Temperature (degree C) | 20.200                                                            | Spectrum Offset (Hz) | 11333.1523           |

Compound1pc.esp

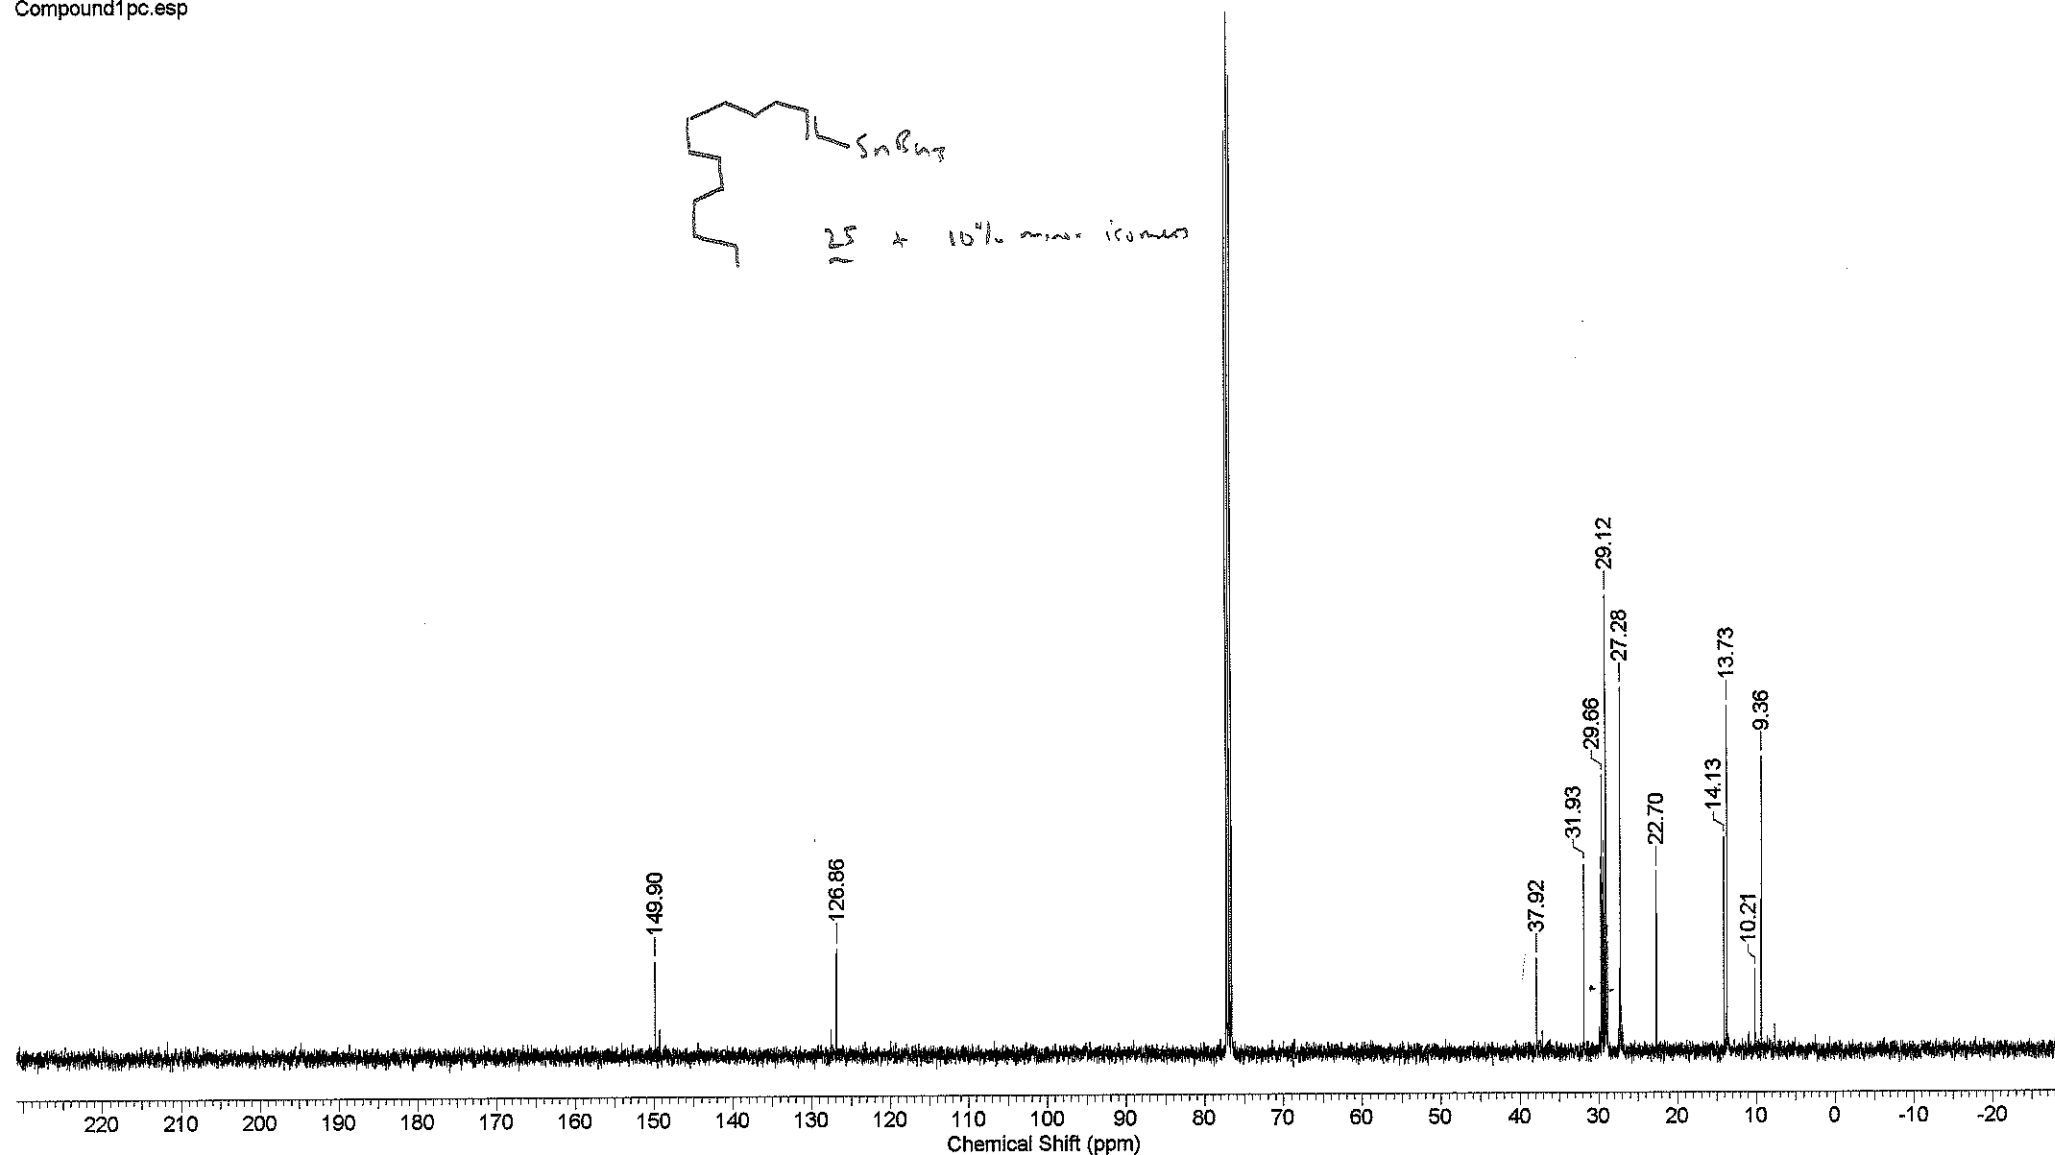



|                        |                      |                        |                                                                   |                      |                      |
|------------------------|----------------------|------------------------|-------------------------------------------------------------------|----------------------|----------------------|
| Acquisition Time (sec) | 3.9649               | Comment                | MWC056app mPROTON CDCl3 (e:\bruk400data\2009\Dec) ejt 51          | Date                 | 08 Dec 2009 08:06:24 |
| Date Stamp             | 08 Dec 2009 08:06:24 | File Name              | I:\Chemistry\Year 2 data\NMR data\Data\Compound4\MWC056pp_000001r |                      |                      |
| Frequency (MHz)        | 400.13               | Nucleus                | 1H                                                                | Number of Transients | 16                   |
| Original Points Count  | 32768                | Owner                  | Administrator                                                     | Points Count         | 32768                |
| Receiver Gain          | 64.00                | SW(cyclical) (Hz)      | 8264.46                                                           | Solvent              | CHLOROFORM-d         |
| Sweep Width (Hz)       | 8264.21              | Temperature (degree C) | 19.700                                                            | Pulse Sequence       | zg30b                |
|                        |                      |                        |                                                                   | Spectrum Offset (Hz) | 2465.1794            |

Compound4pp.esp

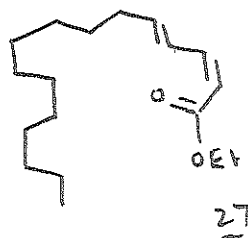

+ 10% (2Z,4Z)-isomer

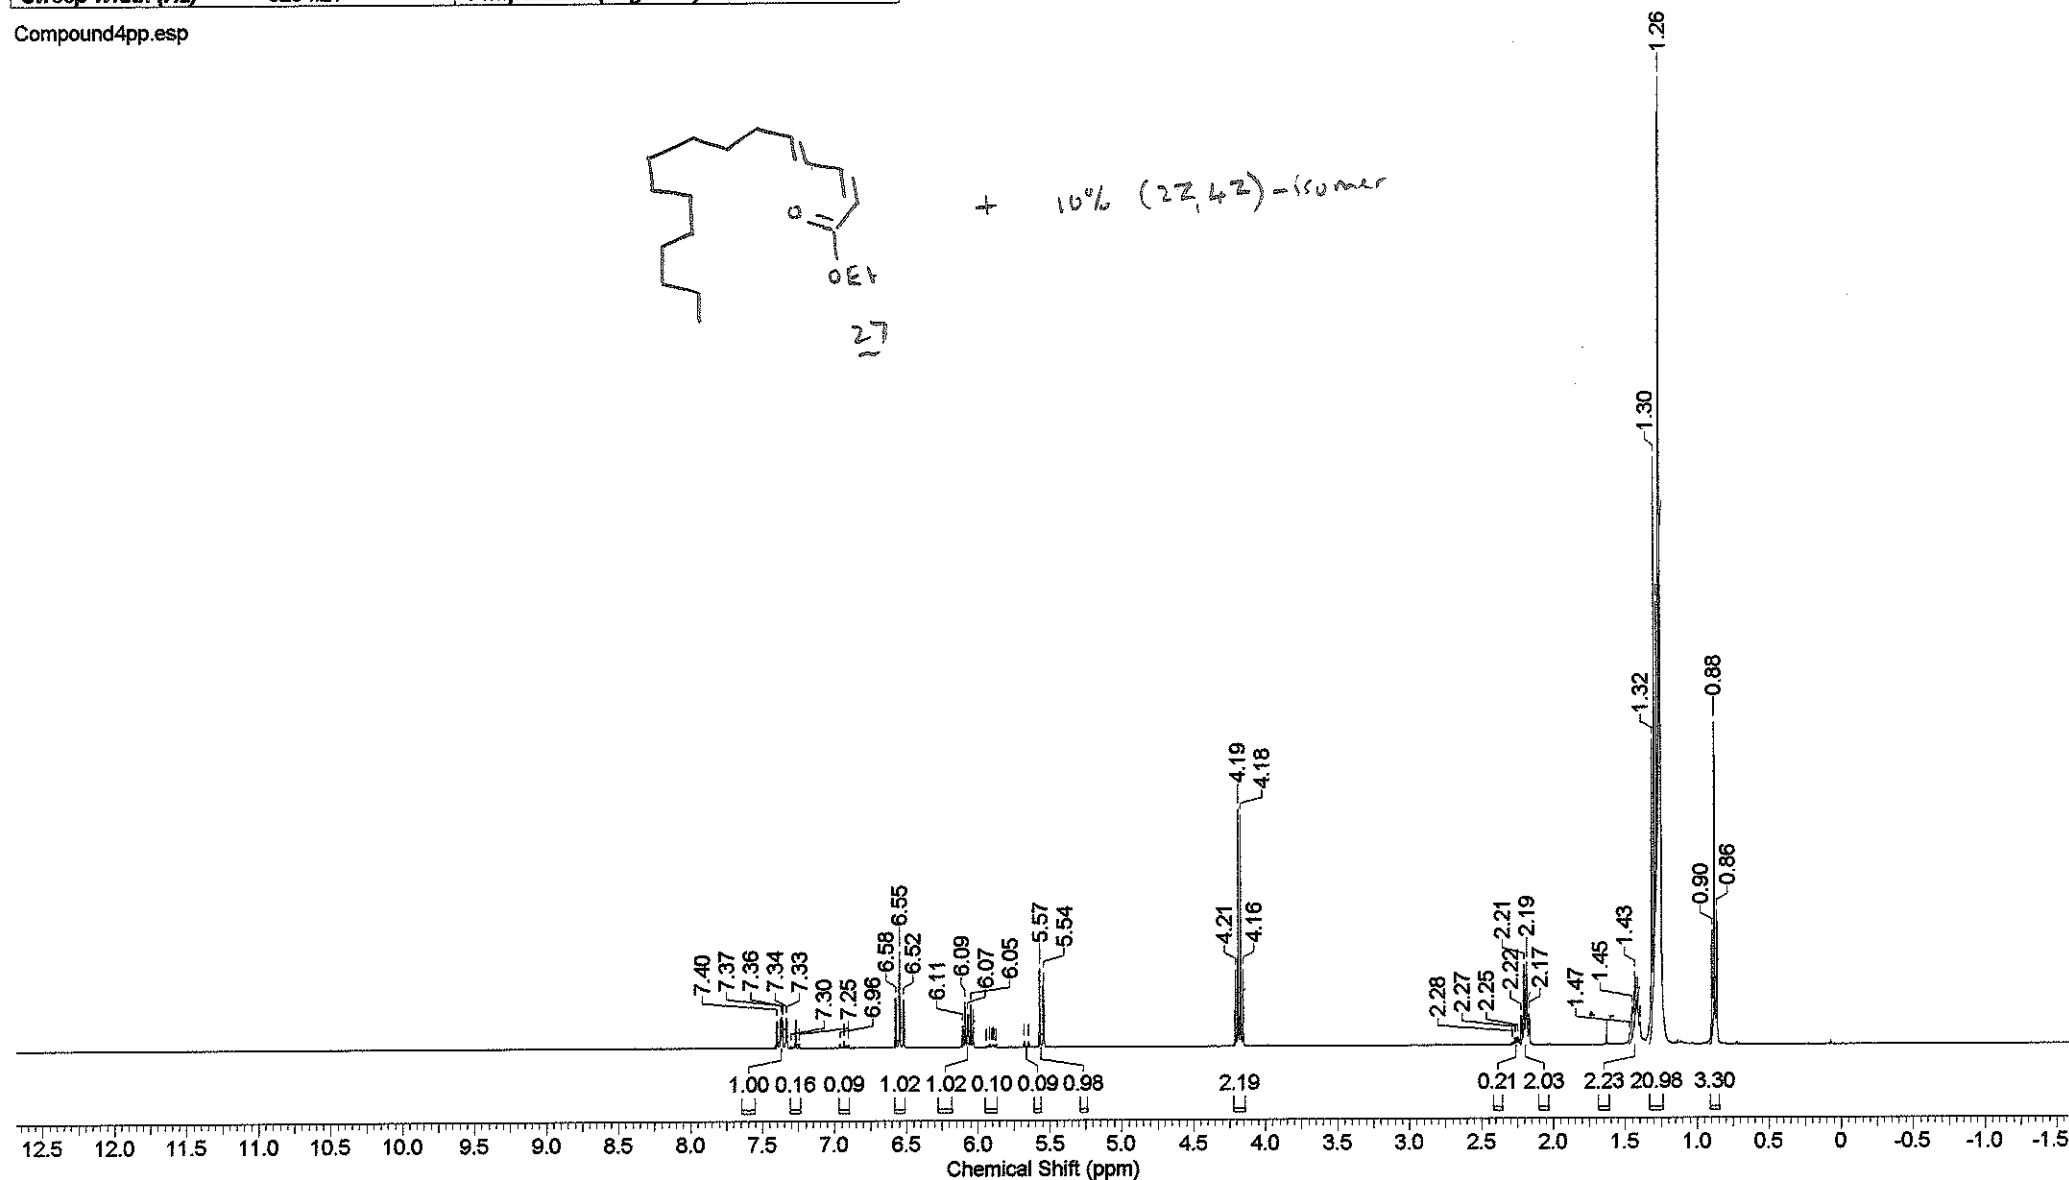

|                               |                                                                   |                             |                                                              |                             |            |
|-------------------------------|-------------------------------------------------------------------|-----------------------------|--------------------------------------------------------------|-----------------------------|------------|
| <b>Acquisition Time (sec)</b> | 1.0835                                                            | <b>Comment</b>              | MWC056pp mCARBONnight CDCl3 {e:\bruk400data\2010\Jan} ejt 21 |                             |            |
| <b>Date</b>                   | 07 Jan 2010 17:33:52                                              | <b>Date Stamp</b>           | 07 Jan 2010 17:33:52                                         |                             |            |
| <b>File Name</b>              | I:\Chemistry\Year 2 data\NMR data\Data\Compound4\MWC056pc_000001r | <b>Frequency (MHz)</b>      | 100.61                                                       |                             |            |
| <b>Nucleus</b>                | 13C                                                               | <b>Number of Transients</b> | 512                                                          | <b>Origin</b>               | AV400      |
| <b>Owner</b>                  | Administrator                                                     | <b>Points Count</b>         | 32768                                                        | <b>Pulse Sequence</b>       | zgpg30     |
| <b>SW(cyclical) (Hz)</b>      | 30241.94                                                          | <b>Solvent</b>              | CHLOROFORM-d                                                 | <b>Spectrum Offset (Hz)</b> | 11330.3838 |
| <b>Temperature (degree C)</b> | 19.000                                                            | <b>Sweep Width (Hz)</b>     | 30241.01                                                     |                             |            |

Compound4pc.esp

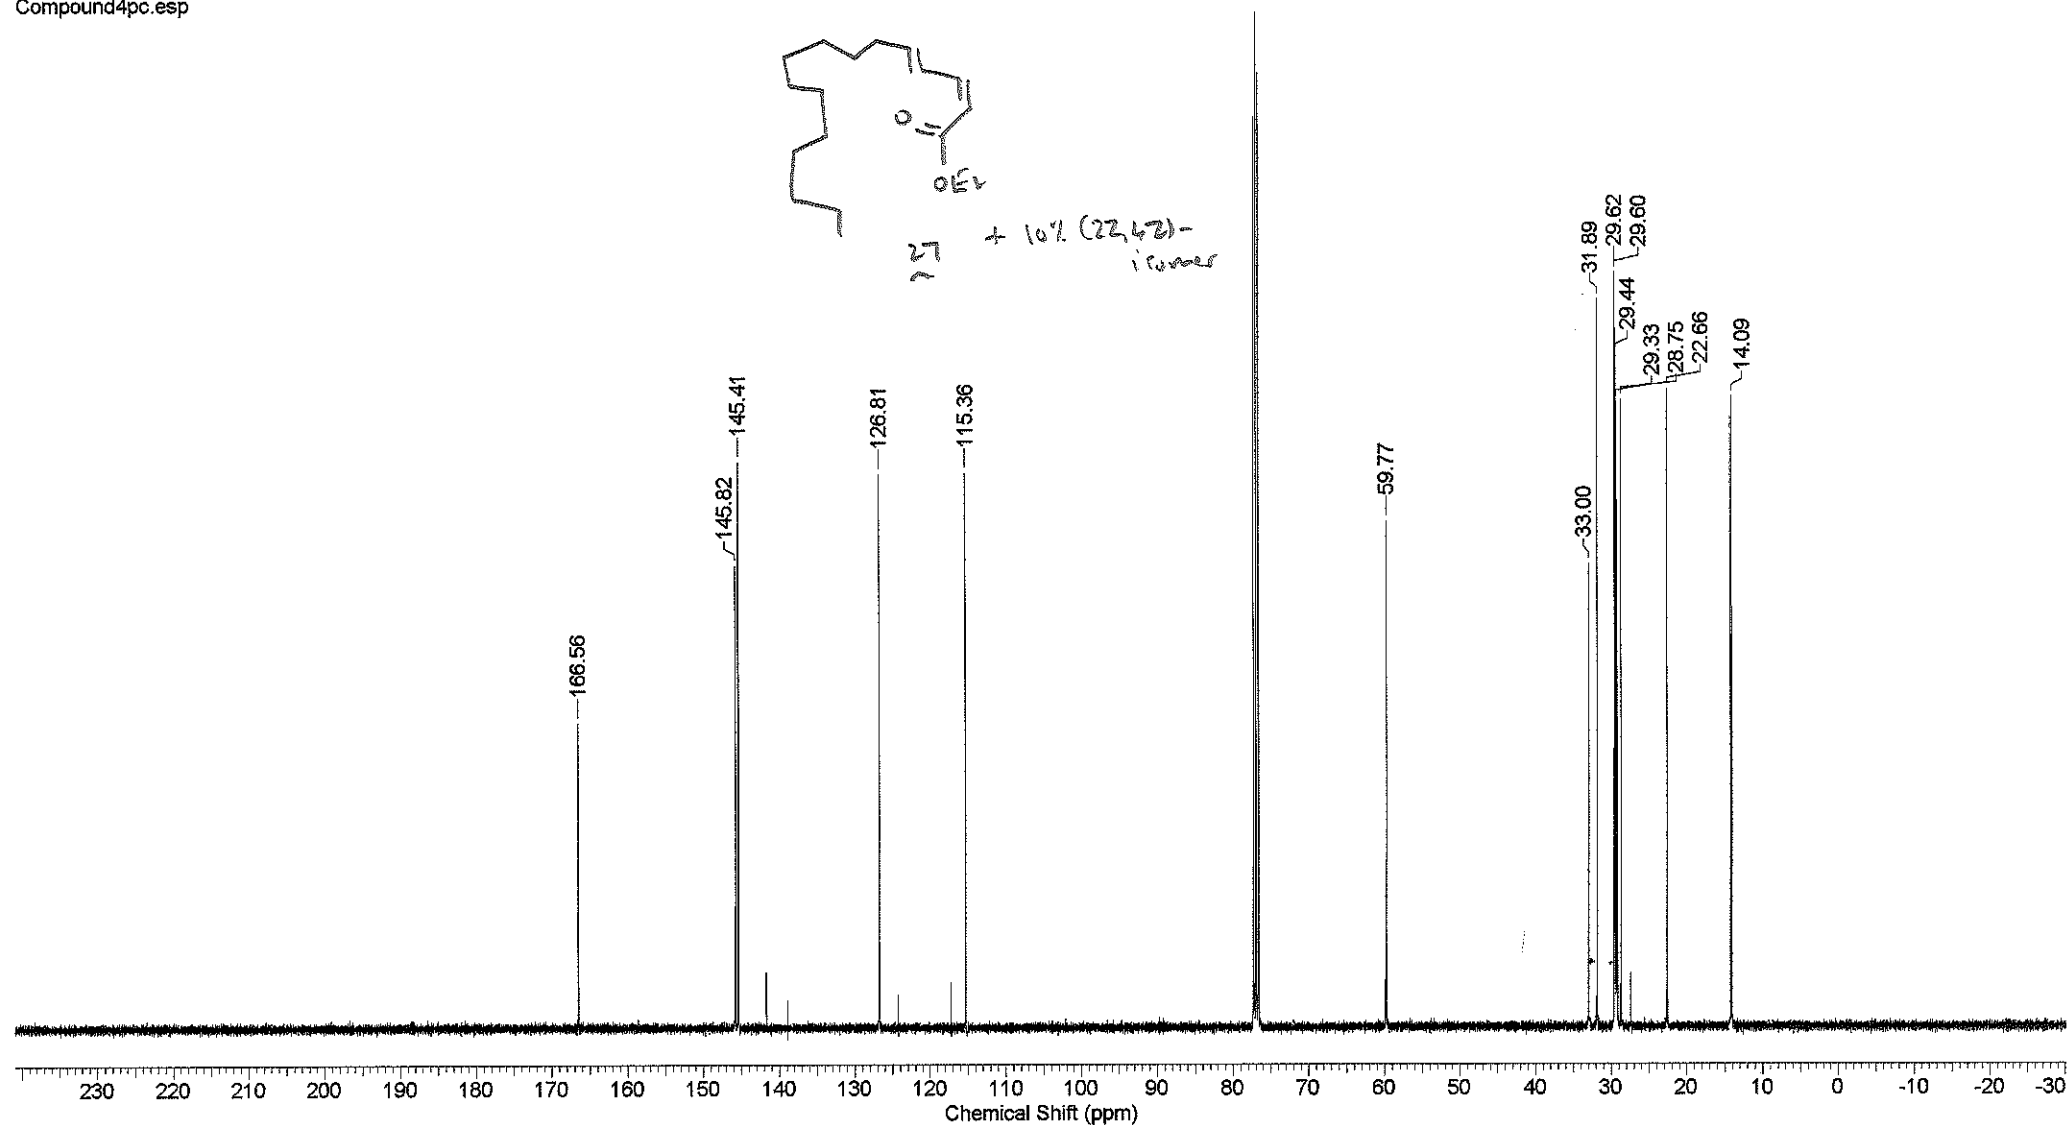

|                        |                      |                        |                                                                   |                      |                      |
|------------------------|----------------------|------------------------|-------------------------------------------------------------------|----------------------|----------------------|
| Acquisition Time (sec) | 3.9649               | Comment                | MWC069pp mPROTON CDCI3 {e:\bruk400data\2010\Jan} ejt 20           | Date                 | 22 Jan 2010 11:39:44 |
| Date Stamp             | 22 Jan 2010 11:39:44 | File Name              | F:\Chemistry\Year 2 data\NMR data\Data\Compound7\MWC069pp_000001r |                      |                      |
| Frequency (MHz)        | 400.13               | Nucleus                | 1H                                                                | Number of Transients | 16                   |
| Original Points Count  | 32768                | Owner                  | Administrator                                                     | Points Count         | 32768                |
| Receiver Gain          | 181.00               | SW(cyclical) (Hz)      | 8264.46                                                           | Pulse Sequence       | zg30b                |
| Sweep Width (Hz)       | 8264.21              | Temperature (degree C) | 21.600                                                            | Solvent              | CHLOROFORM-d         |
|                        |                      |                        |                                                                   | Spectrum Offset (Hz) | 2465.1794            |

Compound7pp.esp

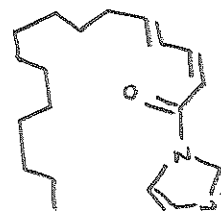

29 + 20% (2E, 4E)-  
isomer

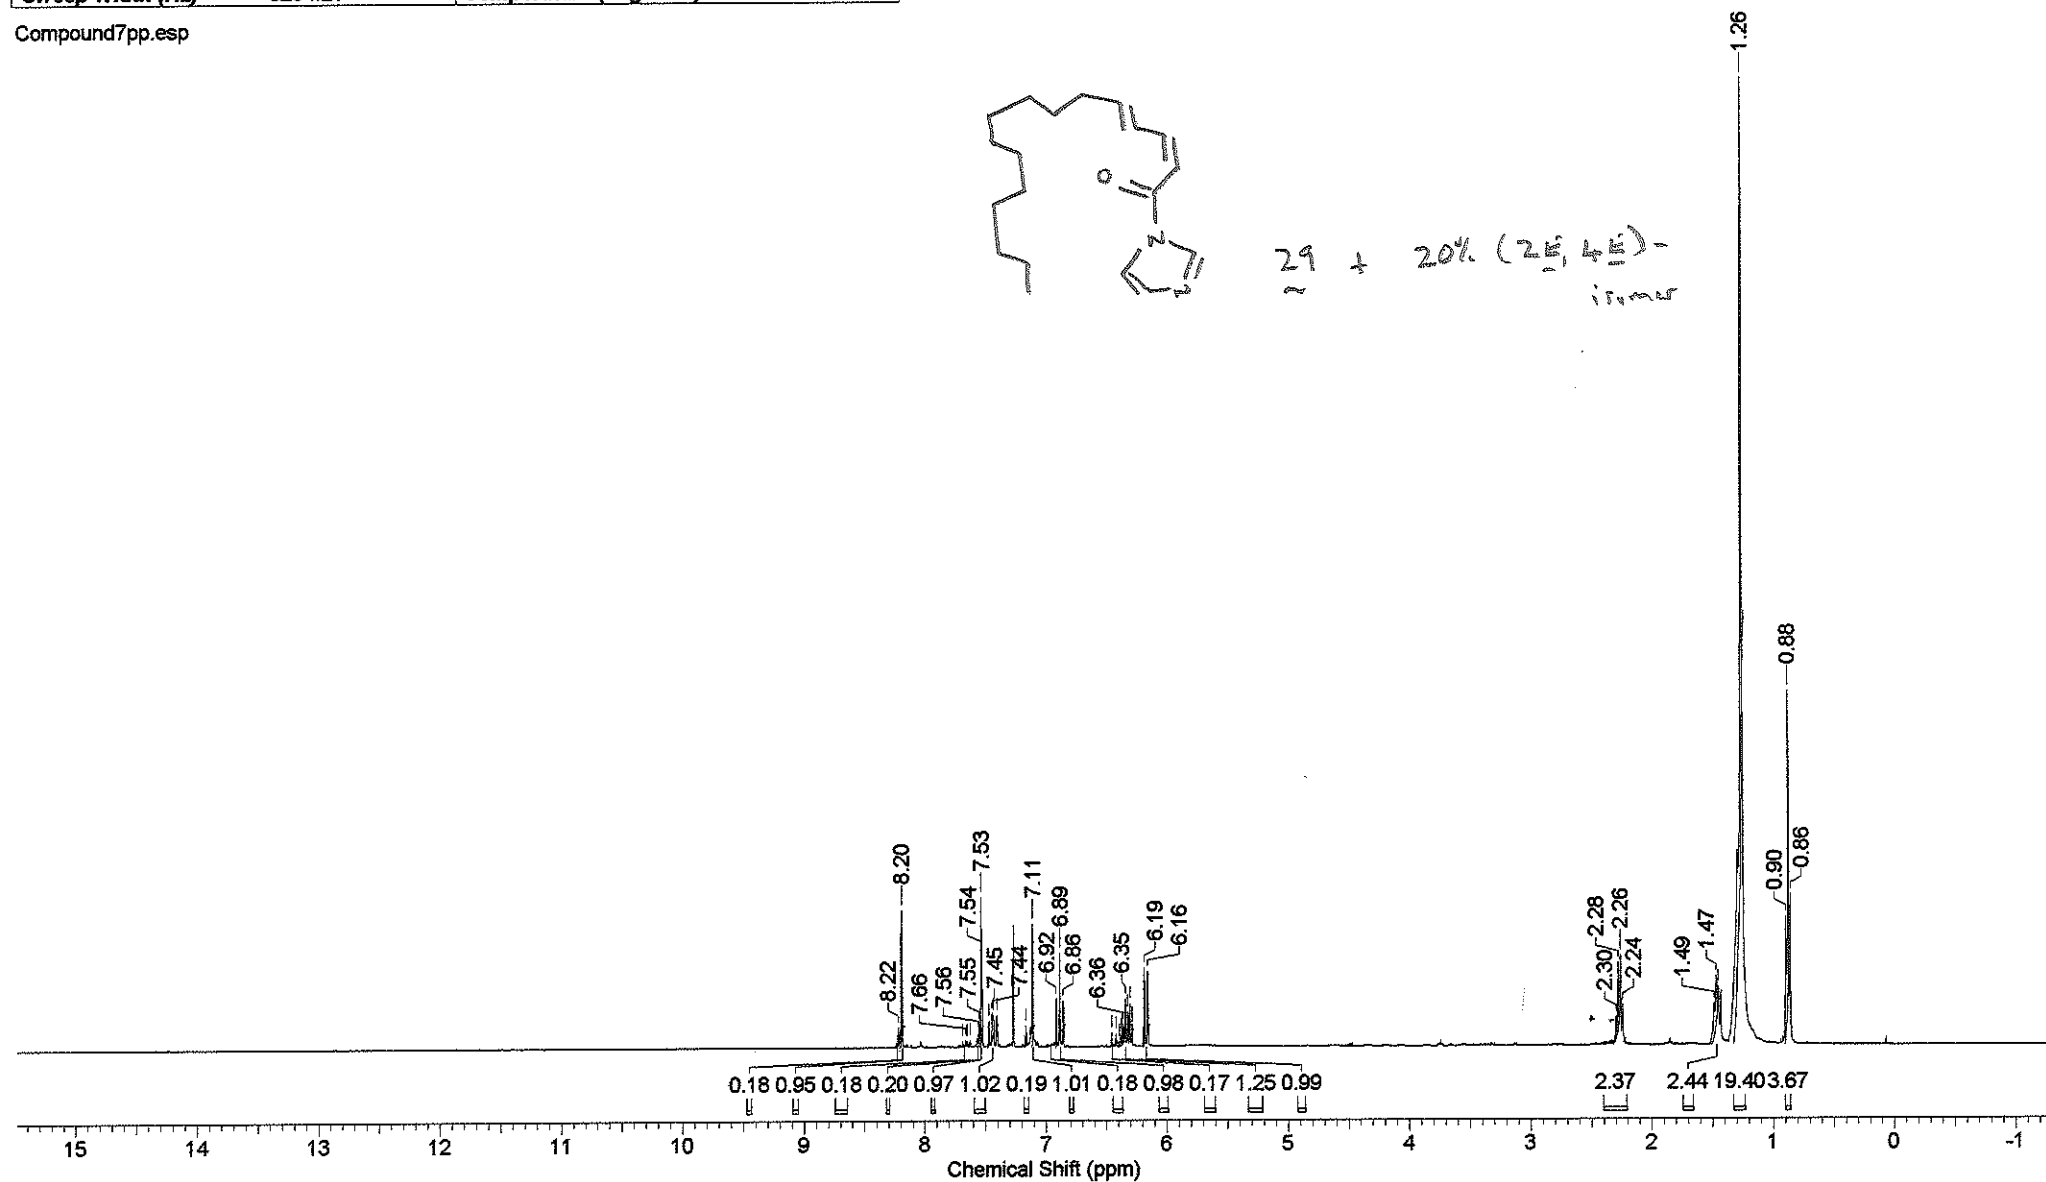

|                               |                      |                               |                                                                   |                             |                      |
|-------------------------------|----------------------|-------------------------------|-------------------------------------------------------------------|-----------------------------|----------------------|
| <b>Acquisition Time (sec)</b> | 1.0835               | <b>Comment</b>                | MWC069pc mCARBON CDCl3 {e:\bruk400data\2010\Jan} ejt 34           | <b>Date</b>                 | 26 Jan 2010 14:19:44 |
| <b>Date Stamp</b>             | 26 Jan 2010 14:19:44 | <b>File Name</b>              | F:\Chemistry\Year 2 data\NMR data\Data\Compound7\MWC069pc_000001r |                             |                      |
| <b>Frequency (MHz)</b>        | 100.61               | <b>Nucleus</b>                | 13C                                                               | <b>Number of Transients</b> | 256                  |
| <b>Original Points Count</b>  | 32768                | <b>Owner</b>                  | Administrator                                                     | <b>Points Count</b>         | 32768                |
| <b>Receiver Gain</b>          | 512.00               | <b>SW(cyclical) (Hz)</b>      | 30241.94                                                          | <b>Solvent</b>              | CHLOROFORM-d         |
| <b>Sweep Width (Hz)</b>       | 30241.01             | <b>Temperature (degree C)</b> | 21.600                                                            | <b>Spectrum Offset (Hz)</b> | 11327.6152           |

Compound7pc.esp

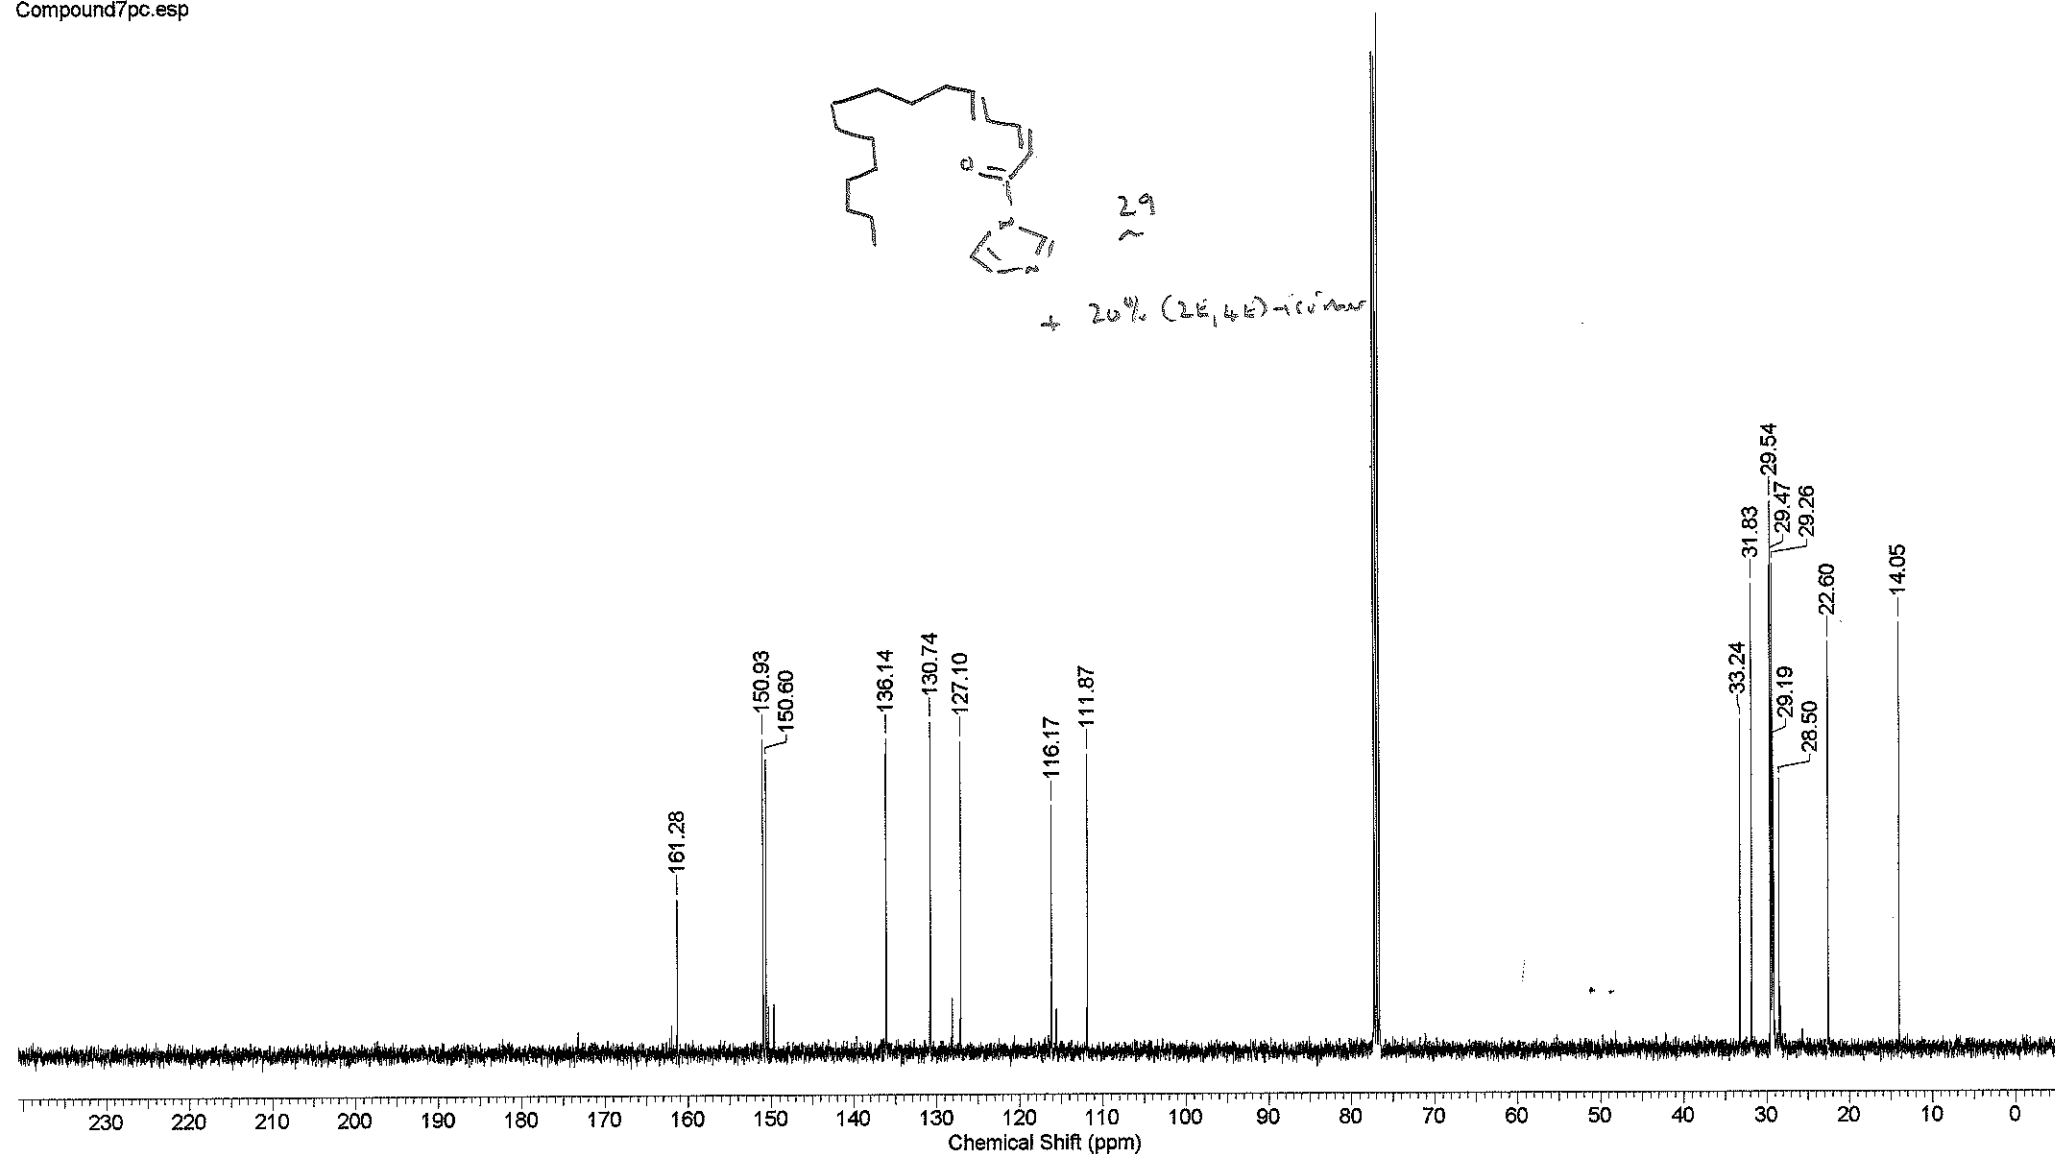

|                               |                      |                          |                                                         |                                                                    |                      |
|-------------------------------|----------------------|--------------------------|---------------------------------------------------------|--------------------------------------------------------------------|----------------------|
| <b>Acquisition Time (sec)</b> | 3.1719               | <b>Comment</b>           | MWE019pp mPROTON CDCl3 /opt/bruk500data/2010/Oct ejt 41 | <b>Date</b>                                                        | 12 Oct 2010 07:28:00 |
| <b>Date Stamp</b>             | 12 Oct 2010 07:28:00 |                          | <b>File Name</b>                                        | F:\Chemistry\Year 3 data\NMR data\Data\Compound 4\MWE019pp_000001r |                      |
| <b>Frequency (MHz)</b>        | 500.13               | <b>Nucleus</b>           | 1H                                                      | <b>Number of Transients</b>                                        | 16                   |
| <b>Original Points Count</b>  | 32768                | <b>Owner</b>             | vnmr1                                                   | <b>Points Count</b>                                                | 32768                |
| <b>Receiver Gain</b>          | 57.00                | <b>SW(cyclical) (Hz)</b> | 10330.58                                                | <b>Solvent</b>                                                     | CHLOROFORM-d         |
| <b>Spectrum Offset (Hz)</b>   | 3079.9768            | <b>Sweep Width (Hz)</b>  | 10330.26                                                | <b>Temperature (degree C)</b>                                      | 21.282               |

Compound4pp.esp

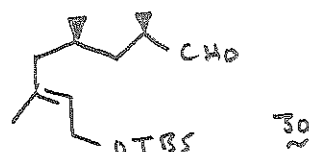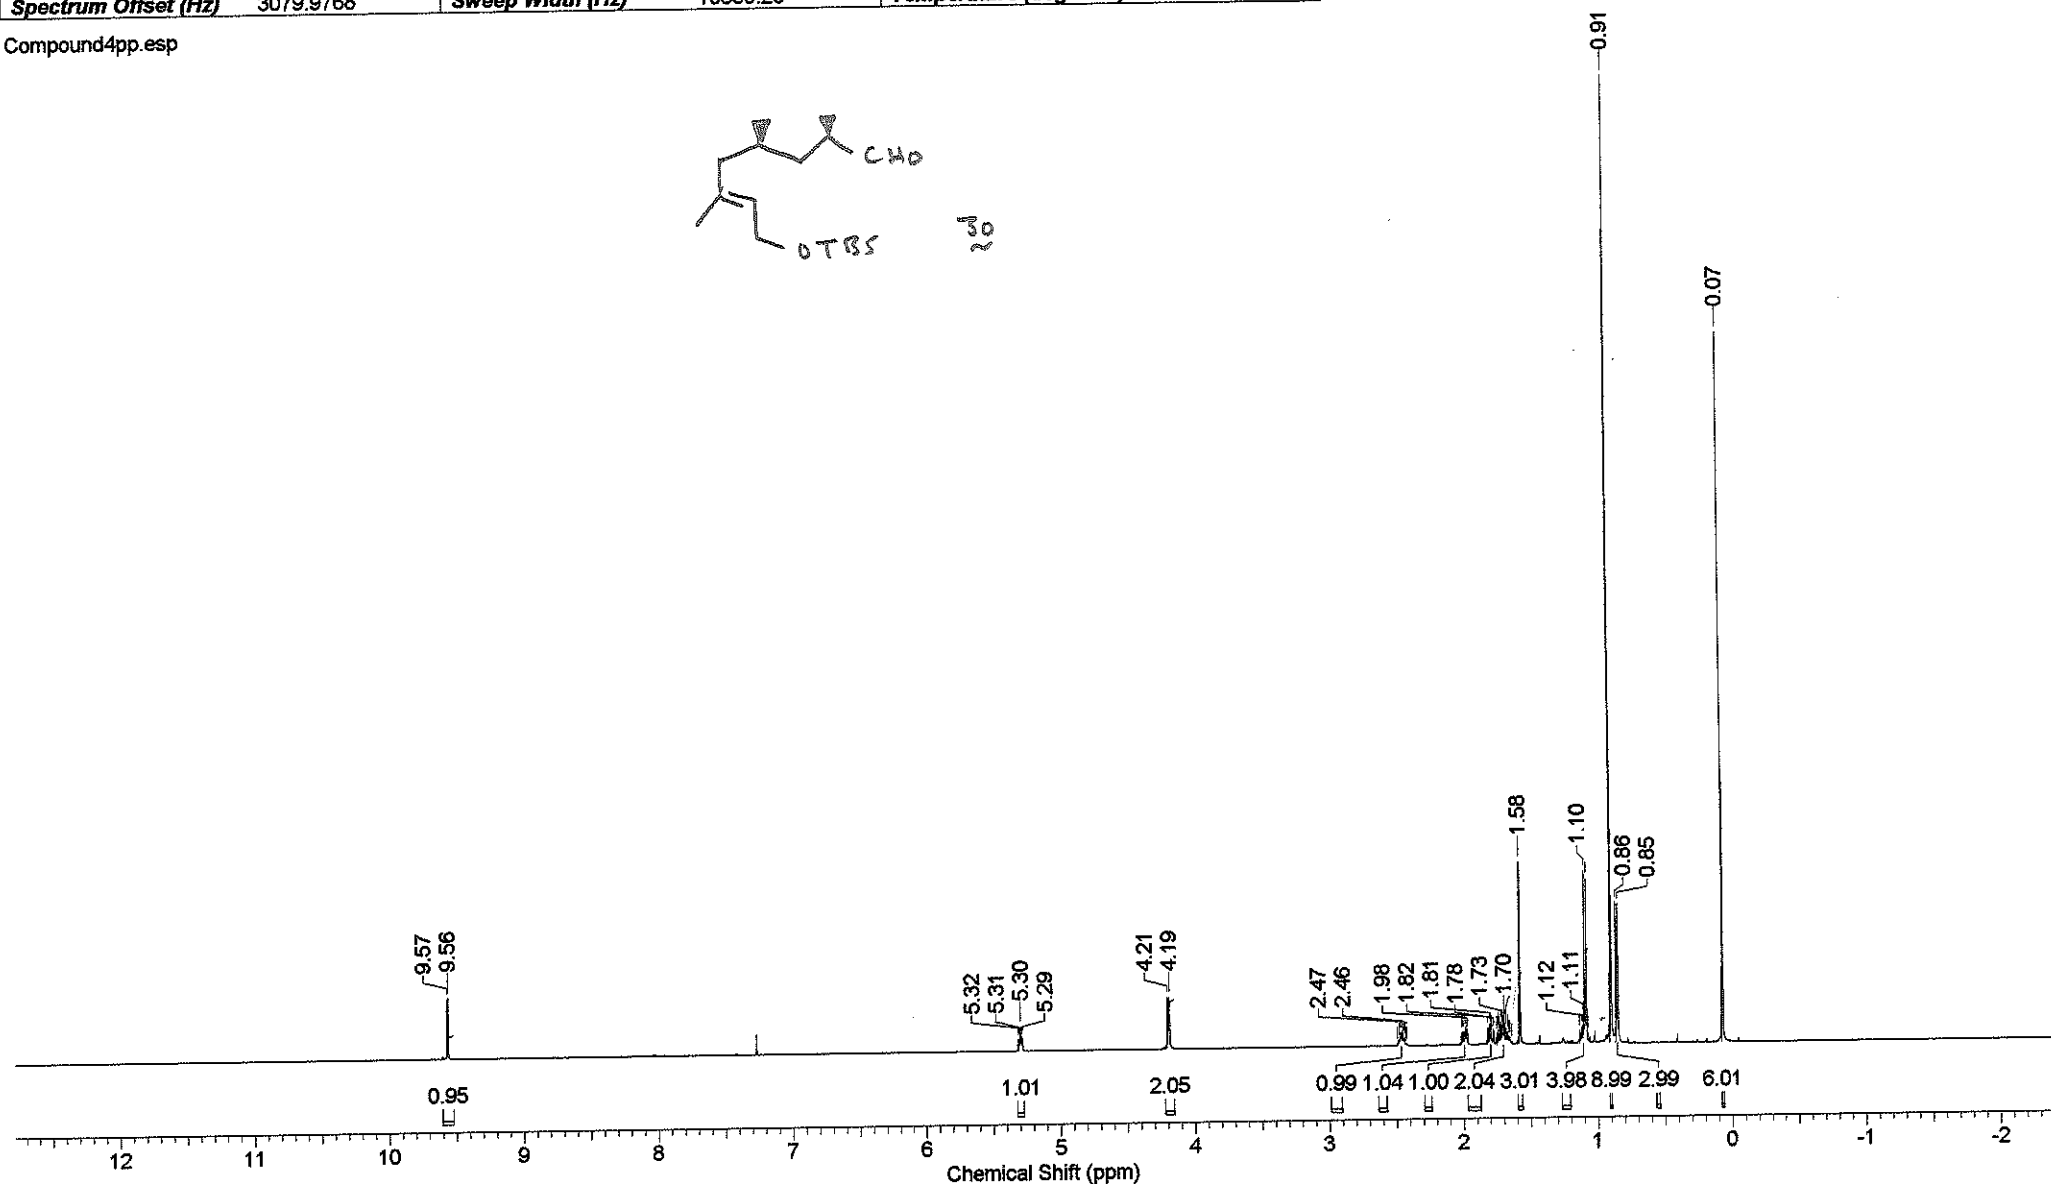

|                               |                      |                               |                                                                    |                             |                      |
|-------------------------------|----------------------|-------------------------------|--------------------------------------------------------------------|-----------------------------|----------------------|
| <b>Acquisition Time (sec)</b> | 1.1010               | <b>Comment</b>                | MWE019pc mCARBON CDCl3 /opt/bruk500data/2010/Oct ejt 7             | <b>Date</b>                 | 11 Oct 2010 13:47:44 |
| <b>Date Stamp</b>             | 11 Oct 2010 13:47:44 | <b>File Name</b>              | F:\Chemistry\Year 3 data\NMR data\Data\Compound 4\MWE019pc_000001r |                             |                      |
| <b>Frequency (MHz)</b>        | 125.76               | <b>Nucleus</b>                | 13C                                                                | <b>Number of Transients</b> | 256                  |
| <b>Original Points Count</b>  | 32768                | <b>Owner</b>                  | vnmr1                                                              | <b>Points Count</b>         | 32768                |
| <b>Receiver Gain</b>          | 512.00               | <b>SW(cyclical) (Hz)</b>      | 29761.90                                                           | <b>Solvent</b>              | CHLOROFORM-d         |
| <b>Sweep Width (Hz)</b>       | 29761.00             | <b>Temperature (degree C)</b> | 21.677                                                             | <b>Spectrum Offset (Hz)</b> | 12571.1768           |

Compound4pc.esp

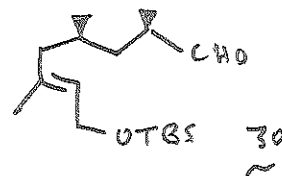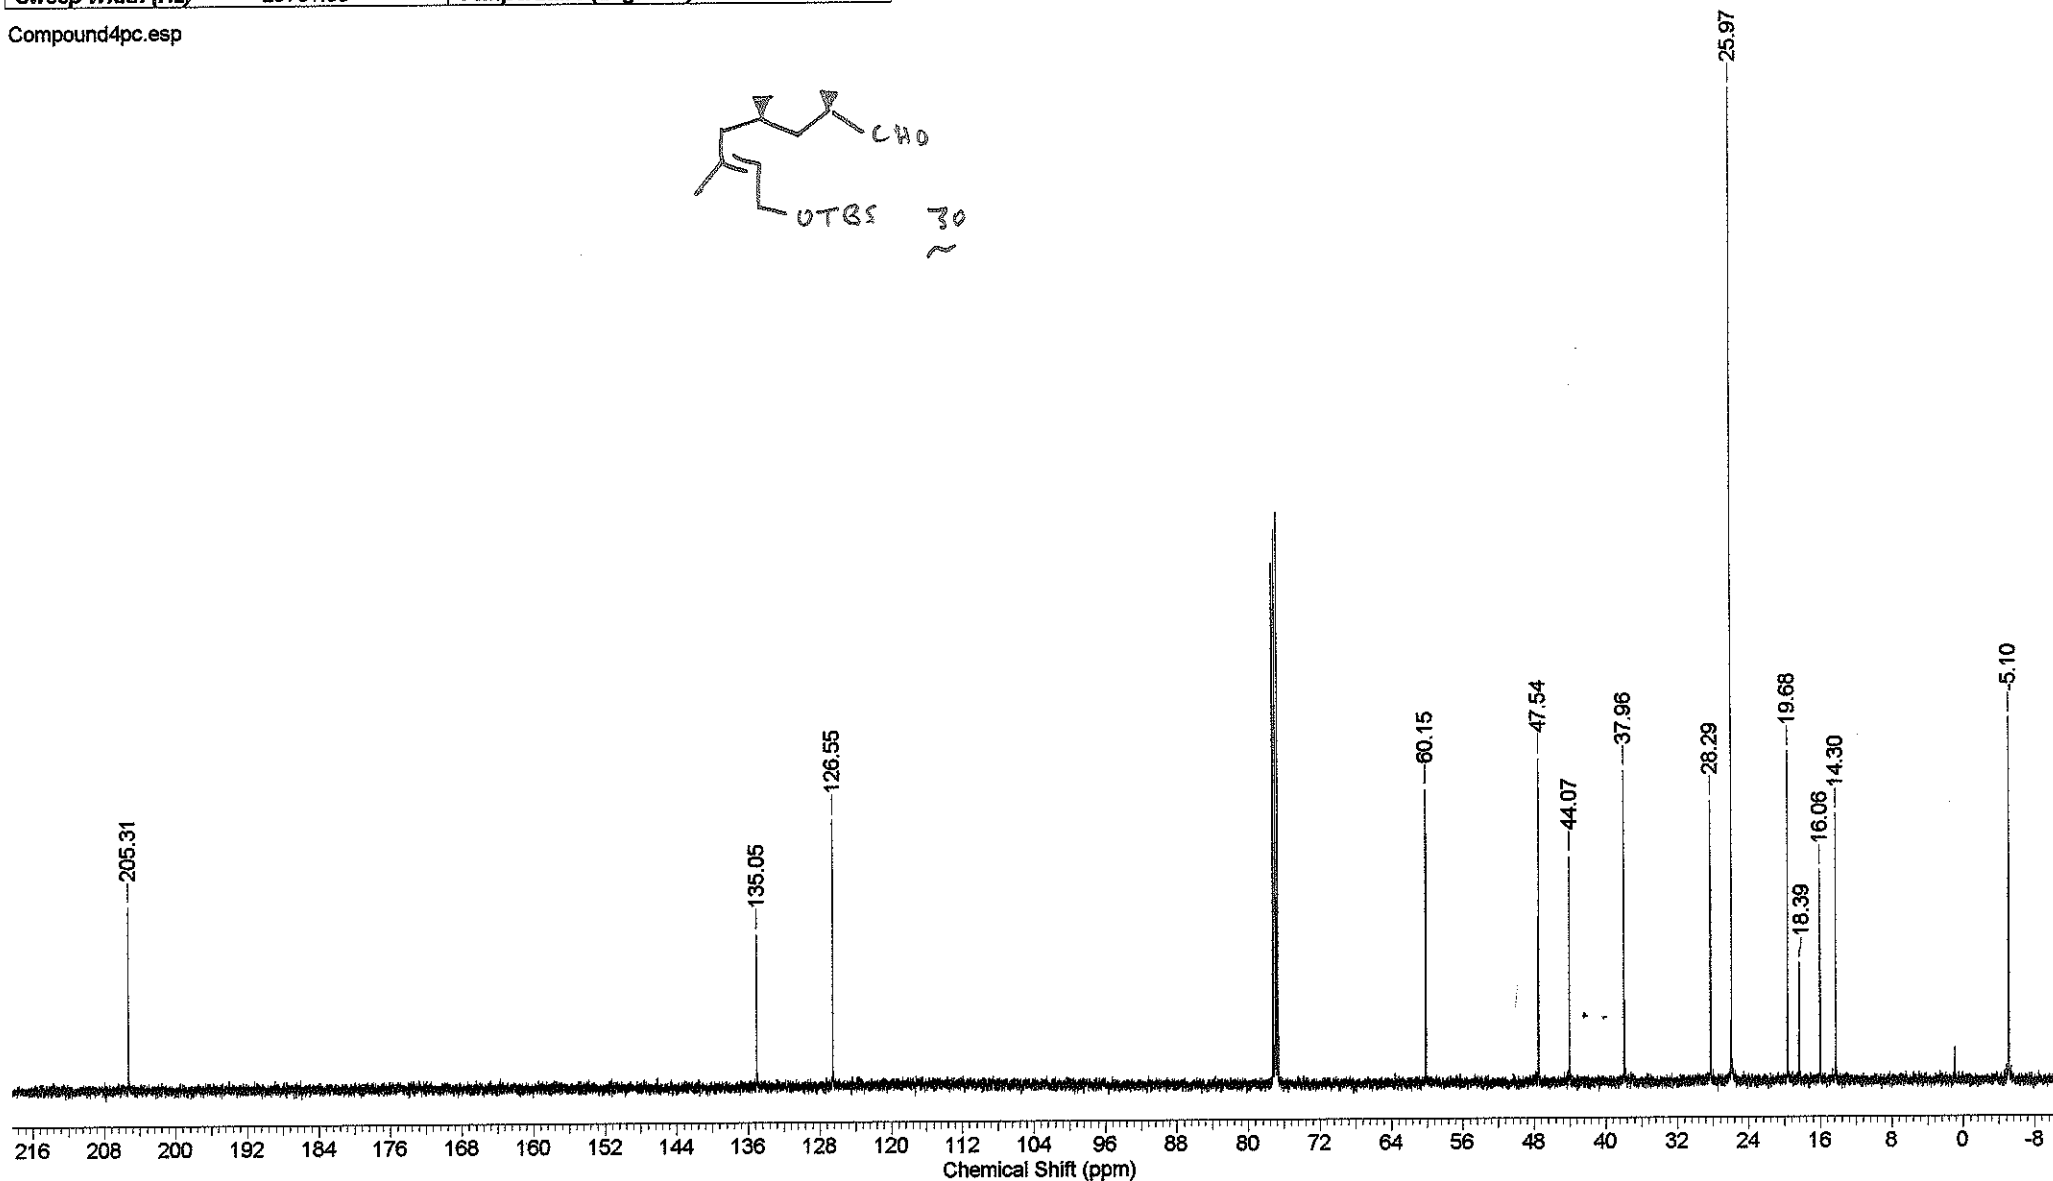

|                               |                      |                               |                                                                    |                             |                      |
|-------------------------------|----------------------|-------------------------------|--------------------------------------------------------------------|-----------------------------|----------------------|
| <b>Acquisition Time (sec)</b> | 3.9649               | <b>Comment</b>                | MWE021pp mPROTON CDCl3 {e:\bruk400data\2010\Oct} ejt 35            | <b>Date</b>                 | 14 Oct 2010 13:52:00 |
| <b>Date Stamp</b>             | 14 Oct 2010 13:52:00 | <b>File Name</b>              | F:\Chemistry\Year 3 data\NMR data\Data\Compound 3\MWE021pp_000001r |                             |                      |
| <b>Frequency (MHz)</b>        | 400.13               | <b>Nucleus</b>                | 1H                                                                 | <b>Number of Transients</b> | 16                   |
| <b>Original Points Count</b>  | 32768                | <b>Owner</b>                  | Administrator                                                      | <b>Points Count</b>         | 32768                |
| <b>Receiver Gain</b>          | 90.50                | <b>SW(cyclical) (Hz)</b>      | 8264.46                                                            | <b>Pulse Sequence</b>       | zg30b                |
| <b>Sweep Width (Hz)</b>       | 8264.21              | <b>Temperature (degree C)</b> | 20.400                                                             | <b>Solvent</b>              | CHLOROFORM-d         |
|                               |                      |                               |                                                                    | <b>Spectrum Offset (Hz)</b> | 2465.4316            |

Compound3pp.esp

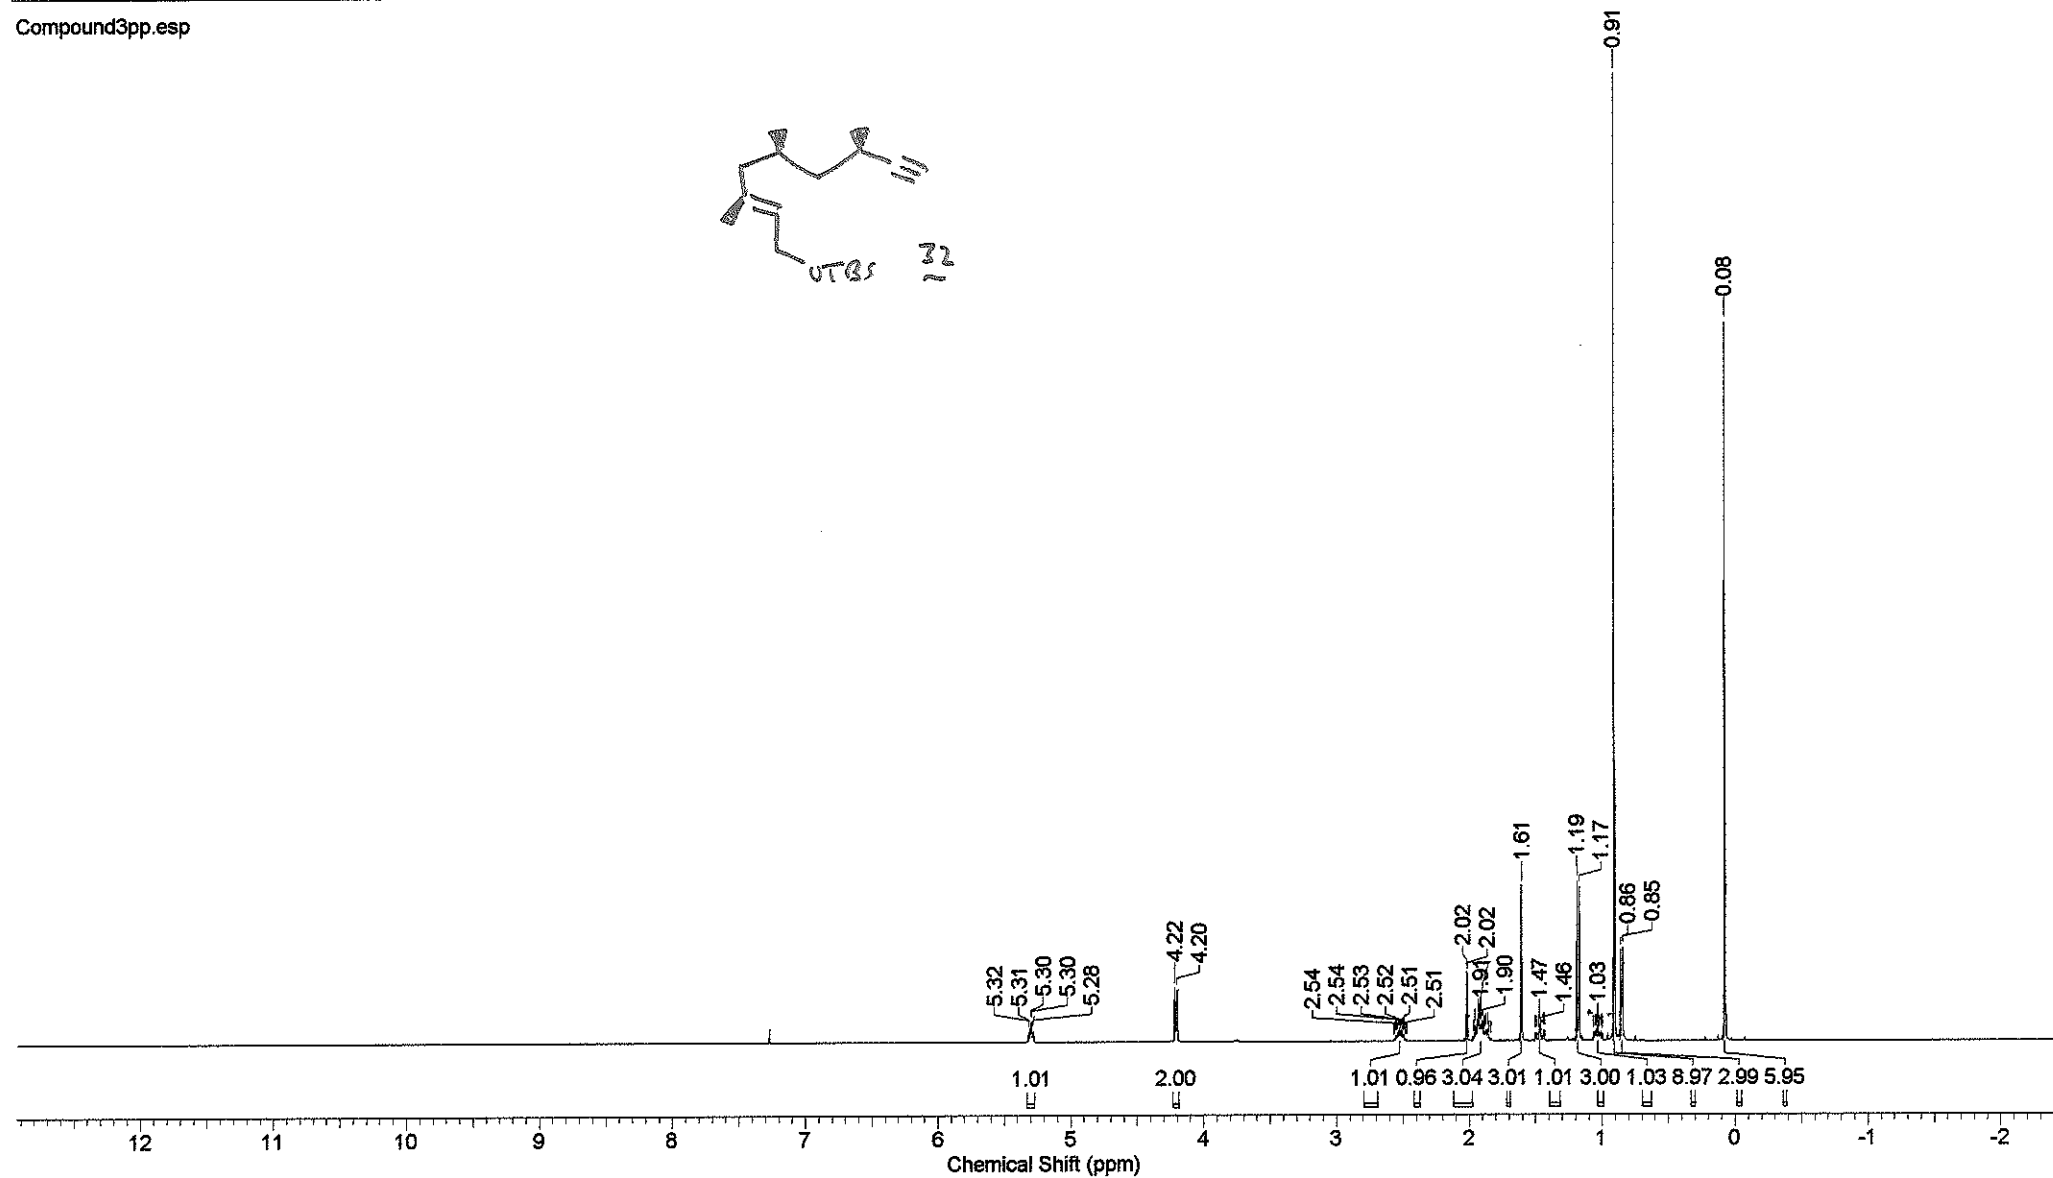

|                        |                      |                        |                                                                    |                      |                      |
|------------------------|----------------------|------------------------|--------------------------------------------------------------------|----------------------|----------------------|
| Acquisition Time (sec) | 1.0835               | Comment                | MWE021pc mCARBON CDCl3 (e:\bruk400data\2010\Oct) ejt 35            | Date                 | 14 Oct 2010 14:15:28 |
| Date Stamp             | 14 Oct 2010 14:15:28 | File Name              | F:\Chemistry\Year 3 data\NMR data\Data\Compound 3\MWE021pc_000001r |                      |                      |
| Frequency (MHz)        | 100.61               | Nucleus                | 13C                                                                | Number of Transients | 256                  |
| Original Points Count  | 32768                | Owner                  | Administrator                                                      | Points Count         | 32768                |
| Receiver Gain          | 512.00               | SW(cyclical) (Hz)      | 30241.94                                                           | Pulse Sequence       | zgpg30               |
| Sweep Width (Hz)       | 30241.01             | Temperature (degree C) | 21.200                                                             | Solvent              | CHLOROFORM-d         |
|                        |                      |                        |                                                                    | Spectrum Offset (Hz) | 11332.2295           |

Compound3pc.esp

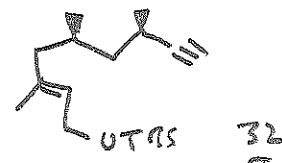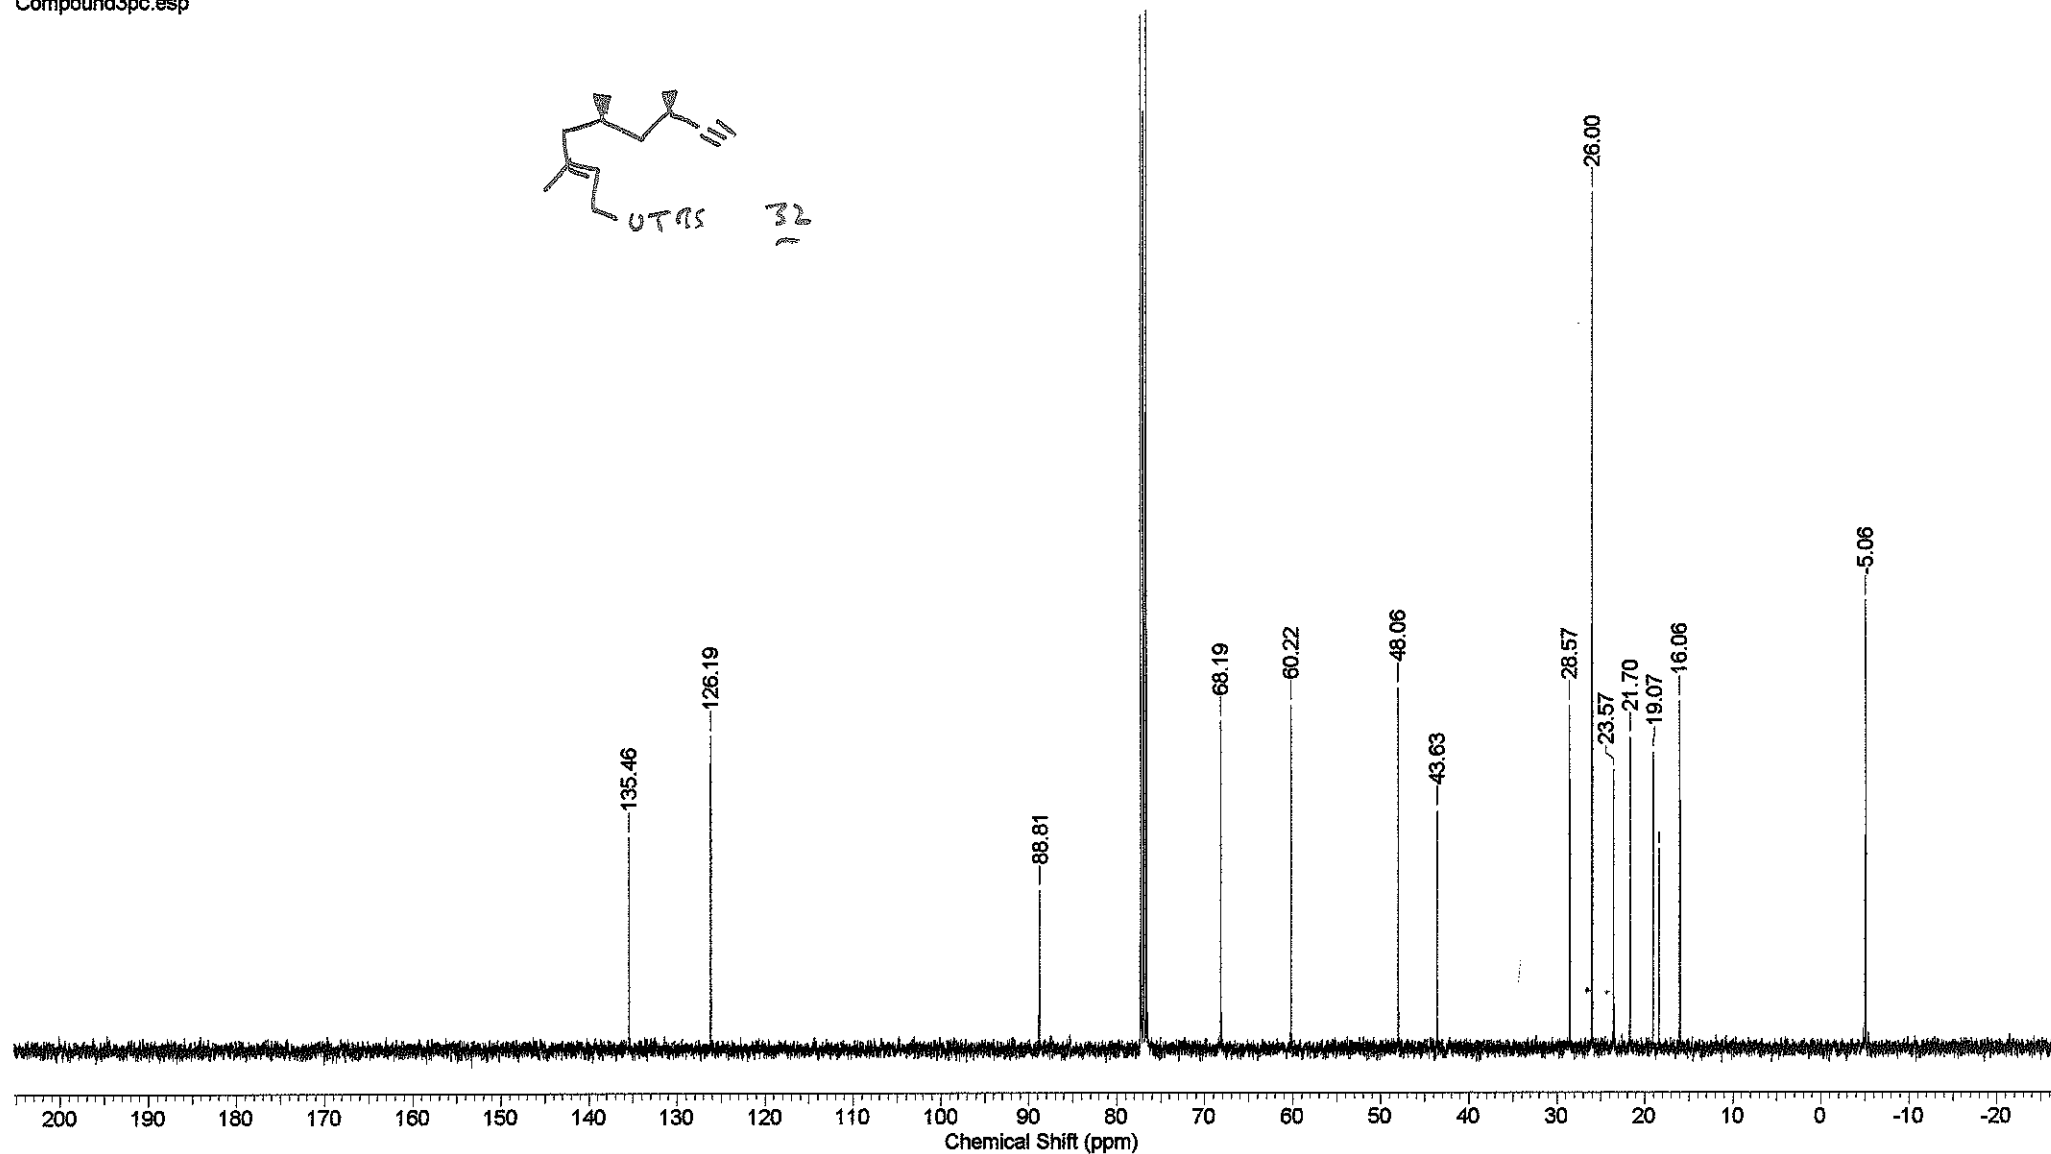



|                        |                      |                        |                                                                    |                      |                      |
|------------------------|----------------------|------------------------|--------------------------------------------------------------------|----------------------|----------------------|
| Acquisition Time (sec) | 3.9649               | Comment                | MWE036pp mPROTON CDCl3 {e:\bruk400data\2010\Nov} ejt 13            | Date                 | 17 Nov 2010 17:08:16 |
| Date Stamp             | 17 Nov 2010 17:08:16 | File Name              | F:\Chemistry\Year 3 data\NMR data\Data\Compound 6\MWE036pp_000001r |                      |                      |
| Frequency (MHz)        | 400.13               | Nucleus                | 1H                                                                 | Number of Transients | 16                   |
| Original Points Count  | 32768                | Owner                  | Administrator                                                      | Points Count         | 32768                |
| Receiver Gain          | 114.00               | SW(cyclical) (Hz)      | 8264.46                                                            | Solvent              | CHLOROFORM-d         |
| Sweep Width (Hz)       | 8264.21              | Temperature (degree C) | 20.300                                                             | Spectrum Offset (Hz) | 2465.1794            |

Compound6pp.esp

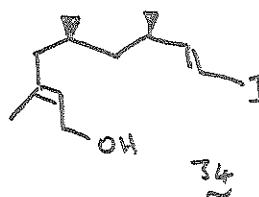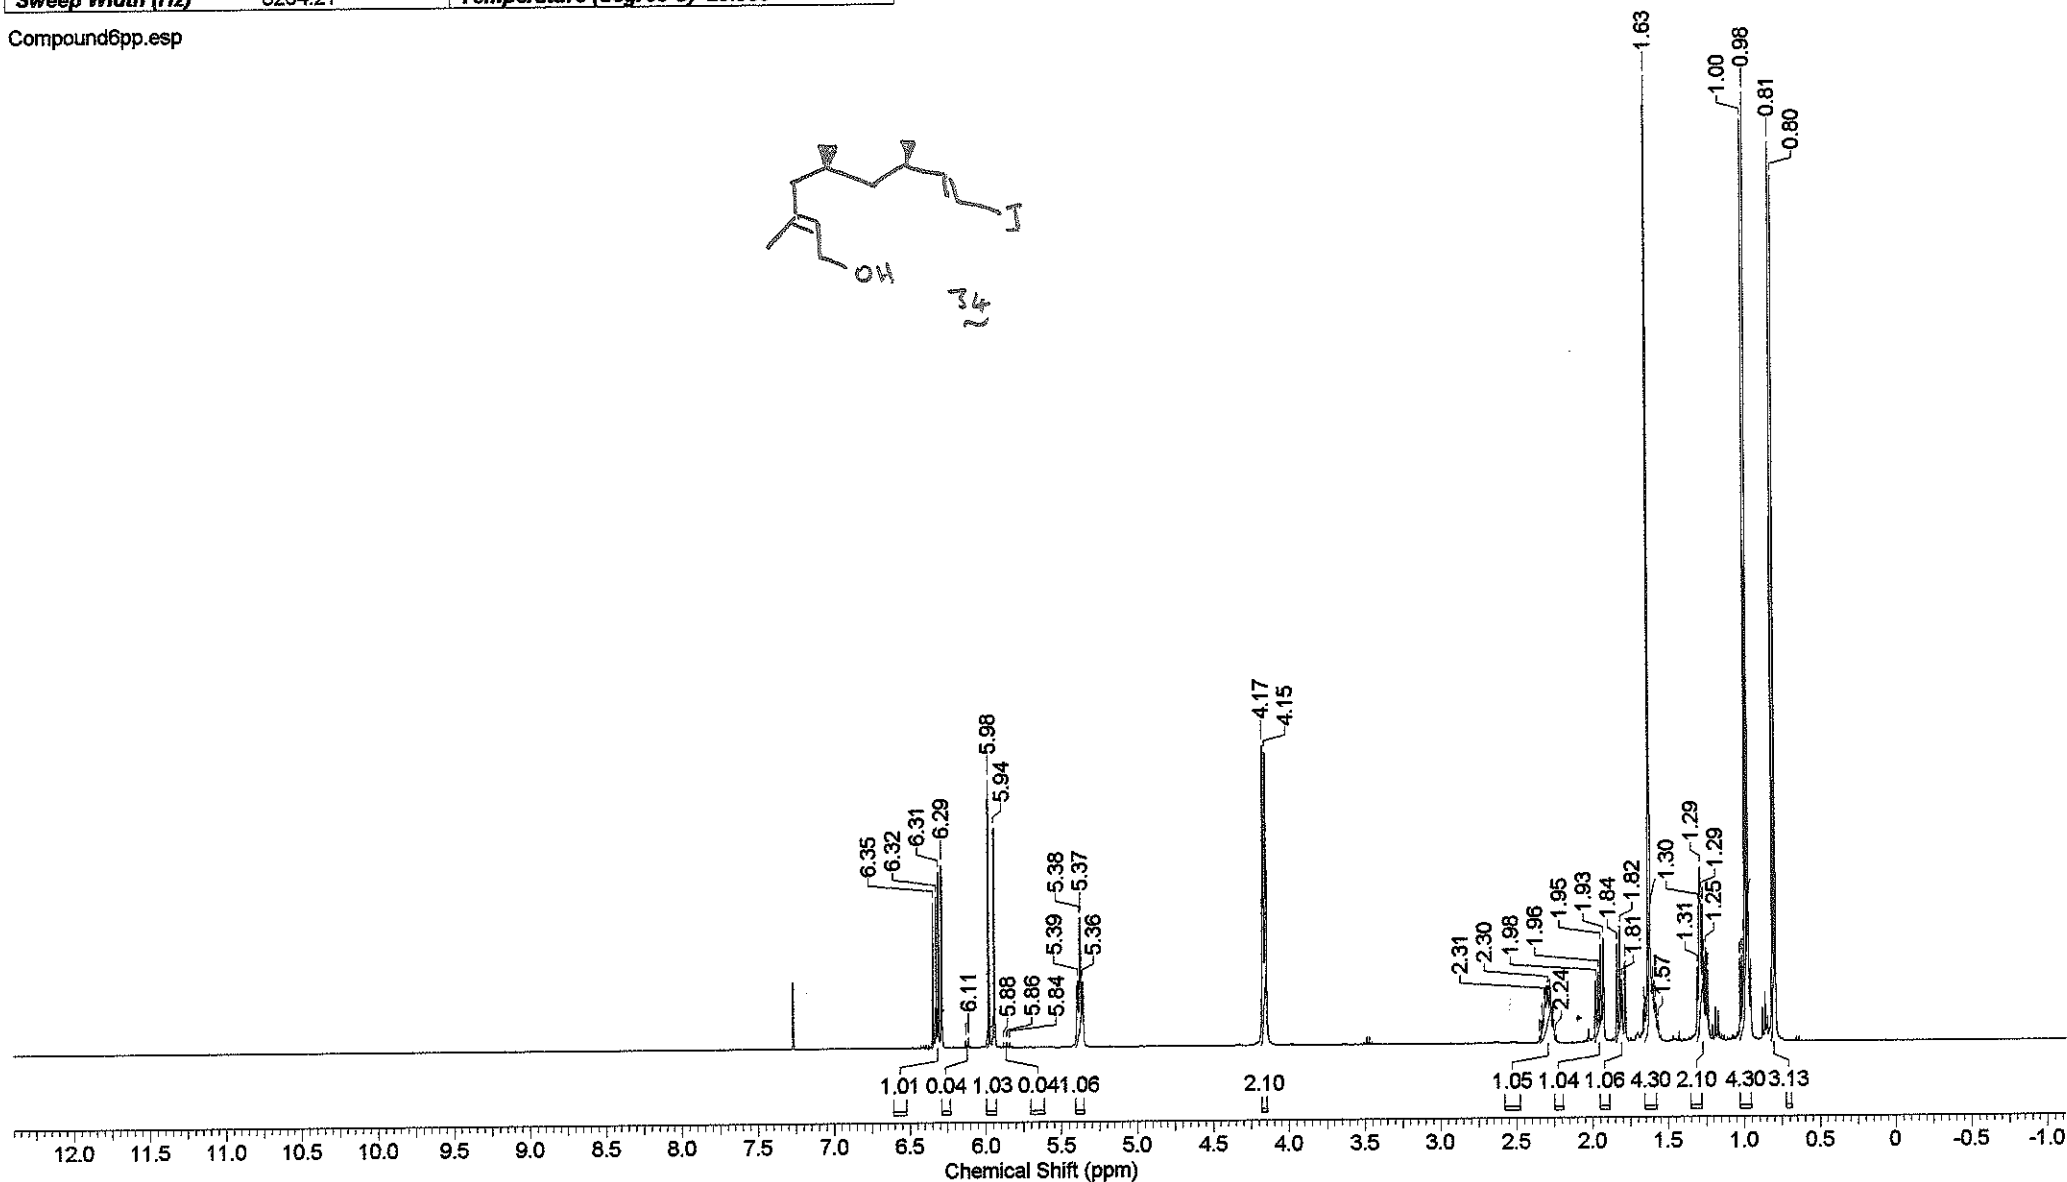

|                               |                      |                               |                                                                    |                             |                      |
|-------------------------------|----------------------|-------------------------------|--------------------------------------------------------------------|-----------------------------|----------------------|
| <b>Acquisition Time (sec)</b> | 1.0835               | <b>Comment</b>                | MWE036pc mCARBON CDCl3 {e:\bruk400data\2010\Nov} ejt 23            | <b>Date</b>                 | 17 Nov 2010 13:30:40 |
| <b>Date Stamp</b>             | 17 Nov 2010 13:30:40 | <b>File Name</b>              | F:\Chemistry\Year 3 data\NMR data\Data\Compound 6\MWE036pc_000001r |                             |                      |
| <b>Frequency (MHz)</b>        | 100.61               | <b>Nucleus</b>                | 13C                                                                | <b>Number of Transients</b> | 256                  |
| <b>Original Points Count</b>  | 32768                | <b>Owner</b>                  | Administrator                                                      | <b>Points Count</b>         | 32768                |
| <b>Receiver Gain</b>          | 512.00               | <b>SW(cyclical) (Hz)</b>      | 30241.94                                                           | <b>Solvent</b>              | CHLOROFORM-d         |
| <b>Sweep Width (Hz)</b>       | 30241.01             | <b>Temperature (degree C)</b> | 20.900                                                             | <b>Pulse Sequence</b>       | zgpg30               |
|                               |                      |                               |                                                                    | <b>Spectrum Offset (Hz)</b> | 11331.3076           |

Compound6pc.esp

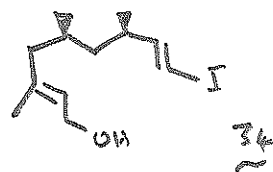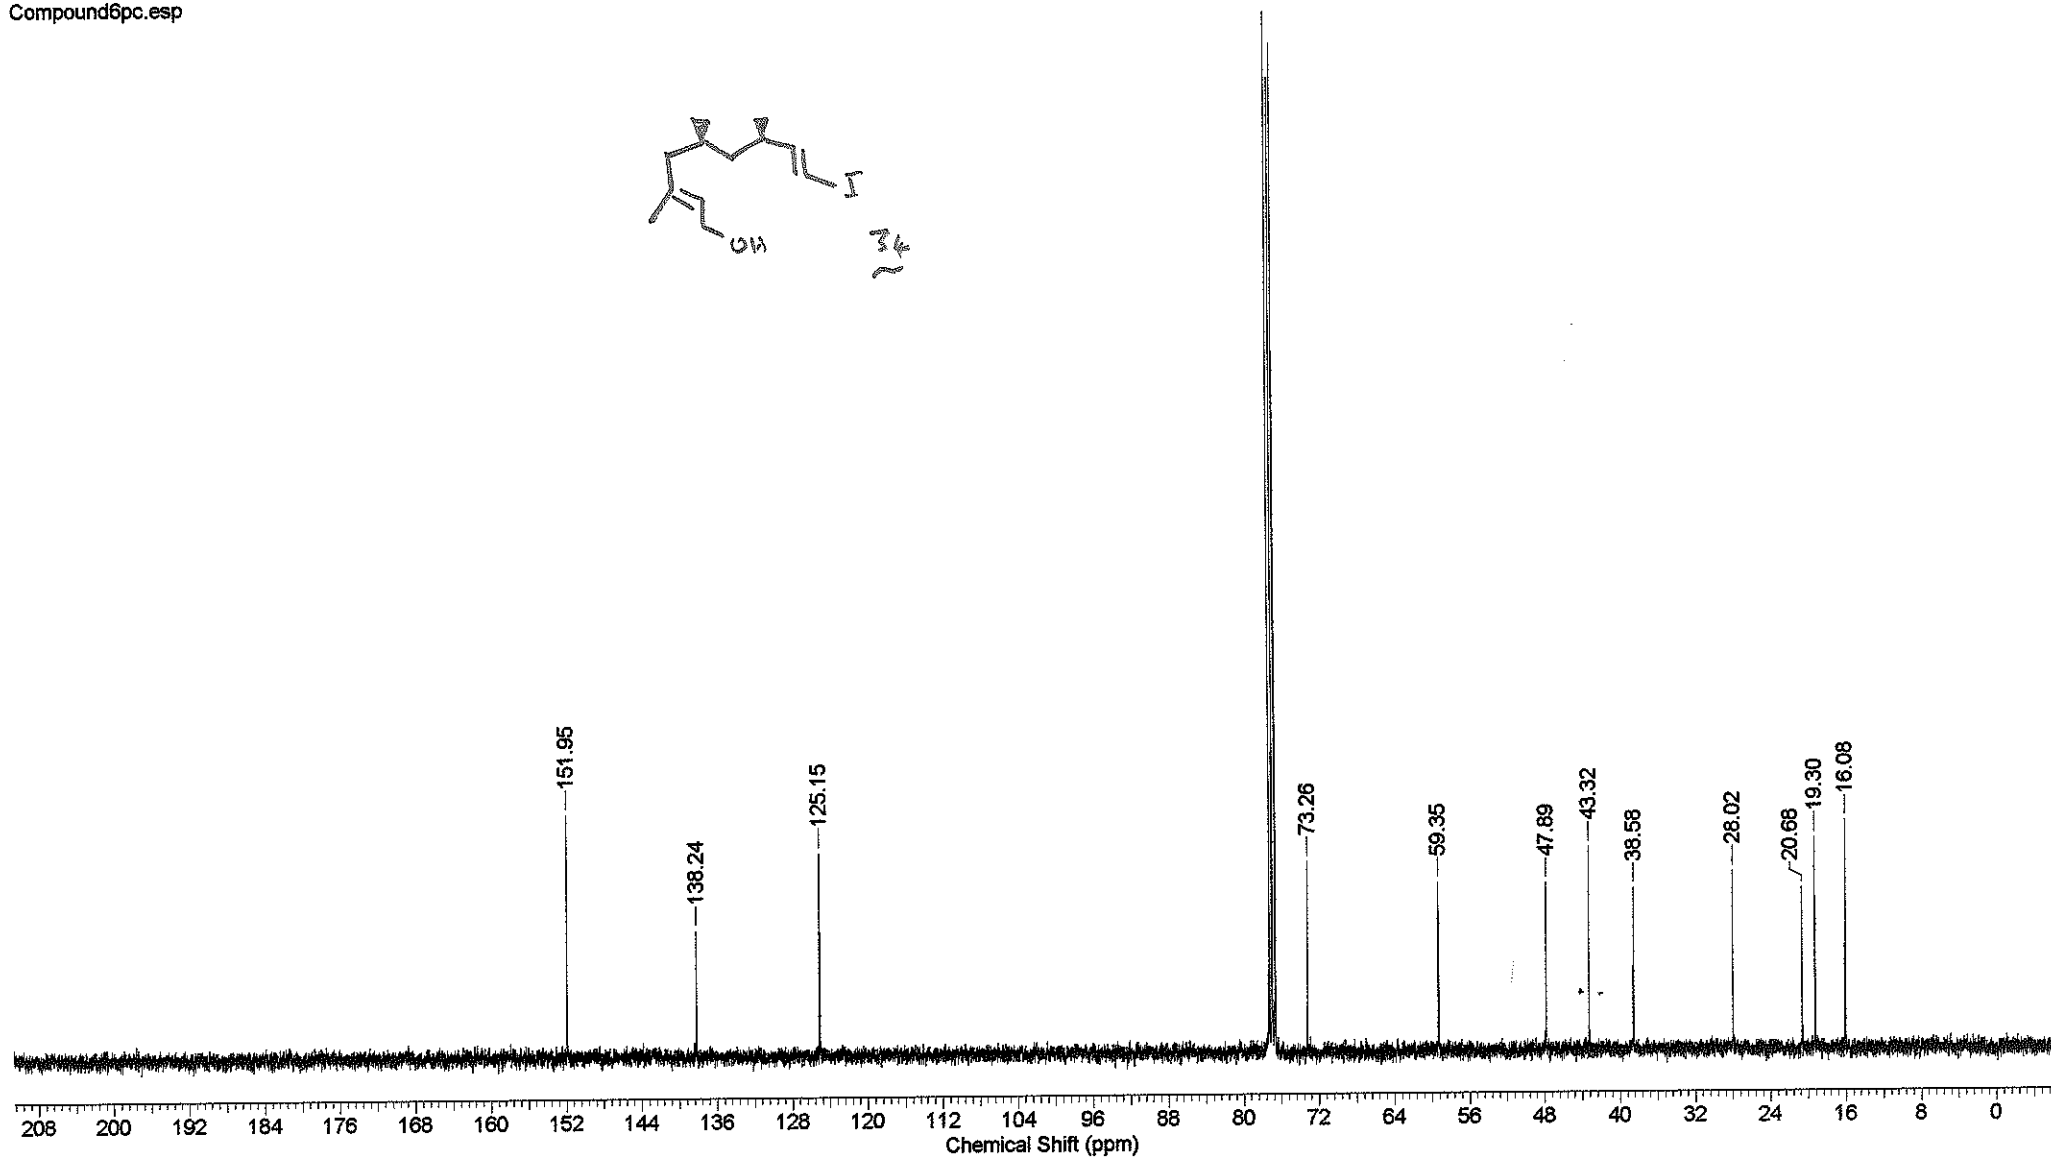

|                        |                      |                        |                                                                    |                      |                      |
|------------------------|----------------------|------------------------|--------------------------------------------------------------------|----------------------|----------------------|
| Acquisition Time (sec) | 3.1719               | Comment                | MWF023pp mPROTON C6D6 /opt/bruk500data/2011/Apr ejt 6              | Date                 | 26 Apr 2011 09:55:12 |
| Date Stamp             | 26 Apr 2011 09:55:12 | File Name              | F:\Chemistry\Year 3 data\NMR data\Data\Compound 9\MWE057pp_000001r |                      |                      |
| Frequency (MHz)        | 500.13               | Nucleus                | 1H                                                                 | Number of Transients | 16                   |
| Original Points Count  | 32768                | Owner                  | vnmr1                                                              | Points Count         | 32768                |
| Receiver Gain          | 20.20                | SW(cyclical) (Hz)      | 10330.58                                                           | Pulse Sequence       | zg30b                |
| Sweep Width (Hz)       | 10330.26             | Temperature (degree C) | 25.187                                                             | Spectrum Offset (Hz) | 3031.5835            |

Compound9pp.esp

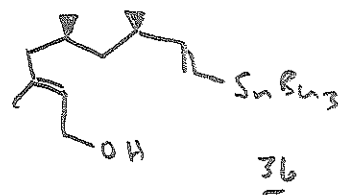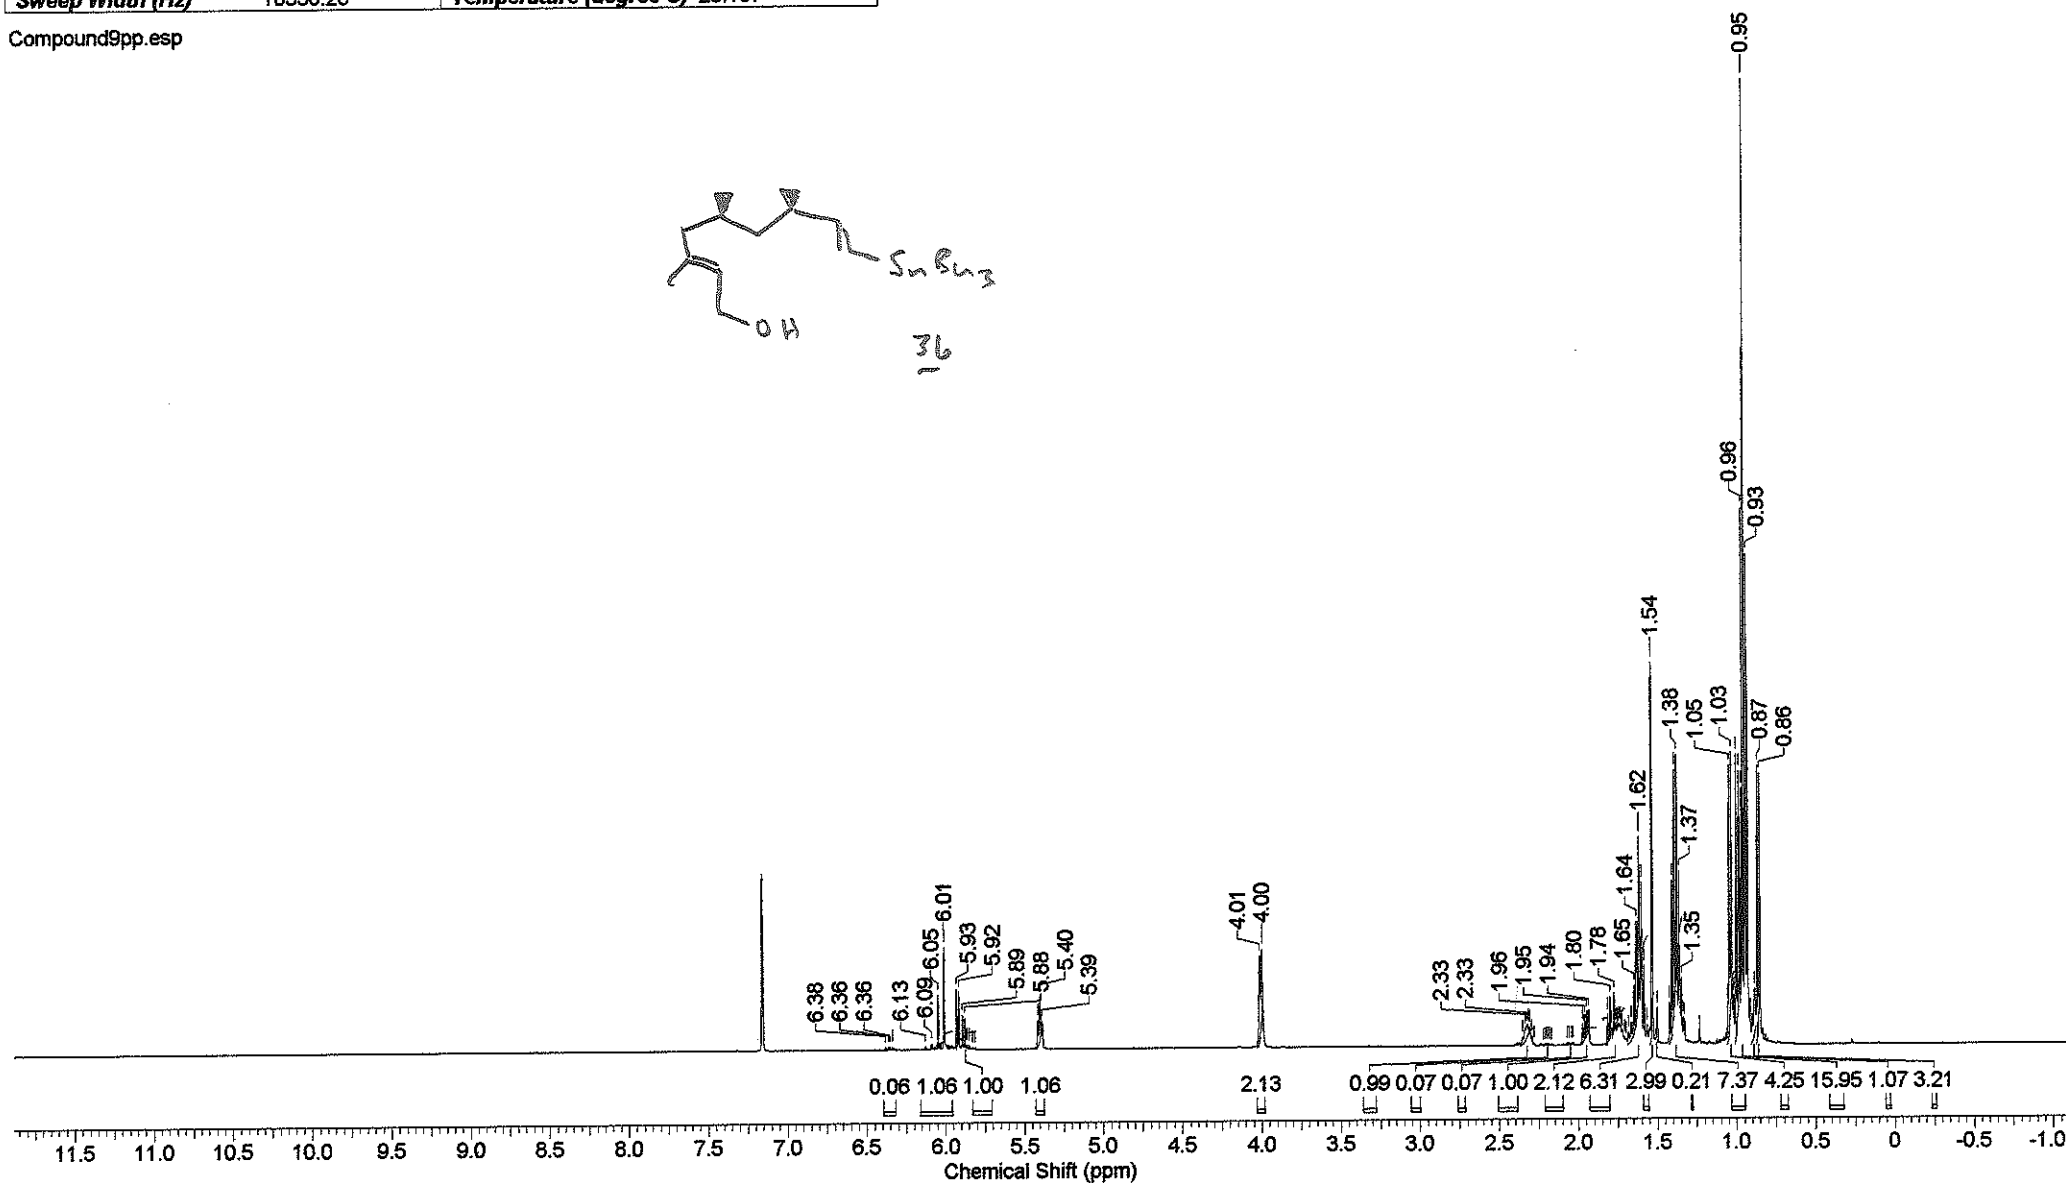

|                               |                      |                               |                                                                    |                             |                      |
|-------------------------------|----------------------|-------------------------------|--------------------------------------------------------------------|-----------------------------|----------------------|
| <b>Acquisition Time (sec)</b> | 1.1010               | <b>Comment</b>                | MWV023pc mCARBON C6D6 /opt/bruk500data/2011/Apr ejt 6              | <b>Date</b>                 | 26 Apr 2011 10:08:00 |
| <b>Date Stamp</b>             | 26 Apr 2011 10:08:00 | <b>File Name</b>              | F:\Chemistry\Year 3 data\NMR data\Data\Compound 9\MWE057pc_000001r |                             |                      |
| <b>Frequency (MHz)</b>        | 125.76               | <b>Nucleus</b>                | 13C                                                                | <b>Number of Transients</b> | 256                  |
| <b>Original Points Count</b>  | 32768                | <b>Owner</b>                  | vnmr1                                                              | <b>Points Count</b>         | 32768                |
| <b>Receiver Gain</b>          | 512.00               | <b>SW(cyclical) (Hz)</b>      | 29761.90                                                           | <b>Pulse Sequence</b>       | zgpg30               |
| <b>Sweep Width (Hz)</b>       | 29761.00             | <b>Temperature (degree C)</b> | 25.187                                                             | <b>Spectrum Offset (Hz)</b> | 12650.5957           |

Compound9pc.esp

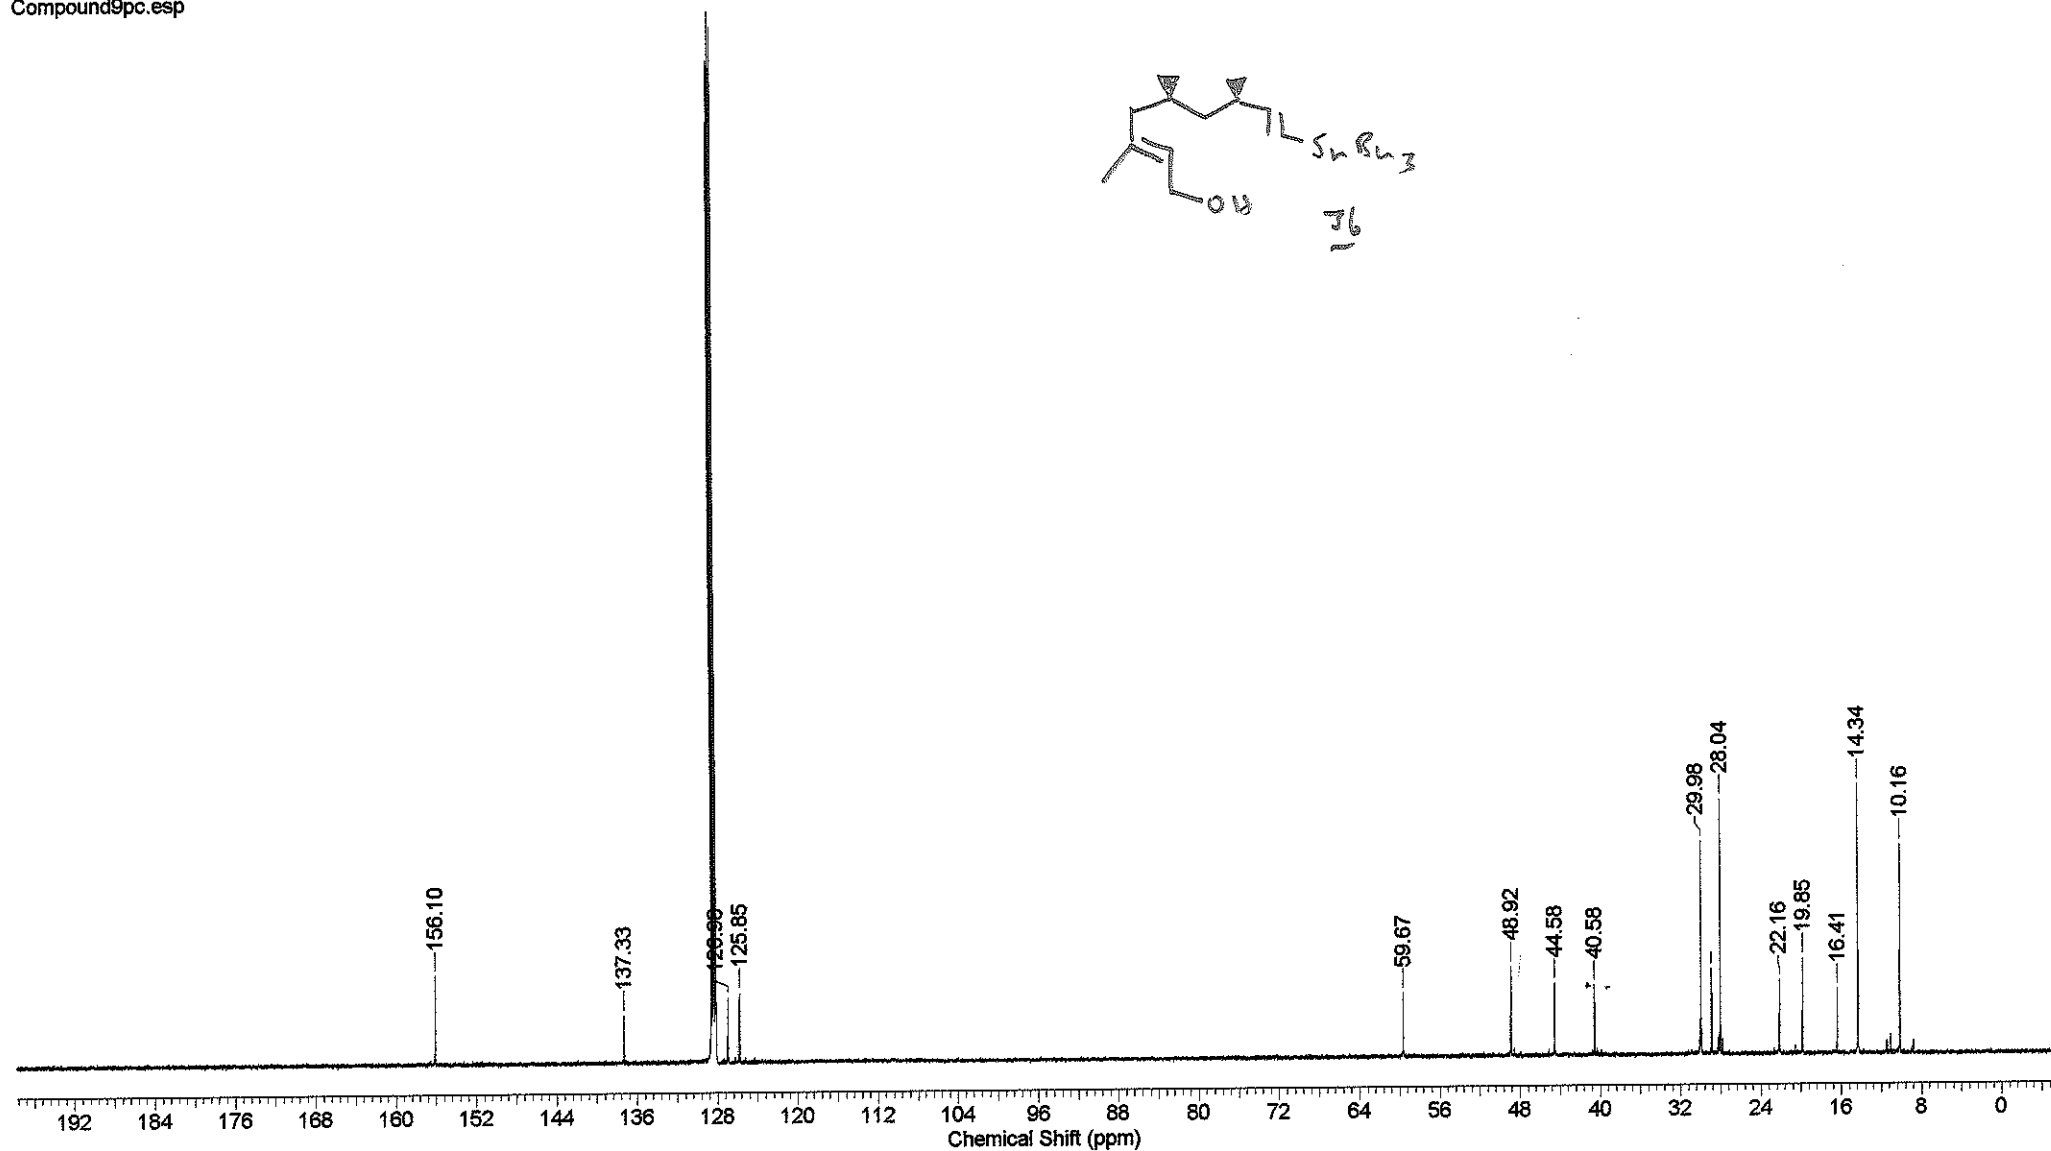

|                        |                      |                        |                                                                     |                      |                      |
|------------------------|----------------------|------------------------|---------------------------------------------------------------------|----------------------|----------------------|
| Acquisition Time (sec) | 3.1719               | Comment                | MWF026pp mPROTON C6D6 /opt/bruk500data/2011/May ejt 3               | Date                 | 03 May 2011 09:44:32 |
| Date Stamp             | 03 May 2011 09:44:32 | File Name              | F:\Chemistry\Year 3 data\NMR data\Data\Compound 10\MWE058pp_000001r |                      |                      |
| Frequency (MHz)        | 500.13               | Nucleus                | <sup>1</sup> H                                                      | Number of Transients | 16                   |
| Original Points Count  | 32768                | Owner                  | vnmr1                                                               | Points Count         | 32768                |
| Receiver Gain          | 8.00                 | SW(cyclical) (Hz)      | 10330.58                                                            | Pulse Sequence       | zg30b                |
| Sweep Width (Hz)       | 10330.26             | Solvent                | BENZENE-d6                                                          | Spectrum Offset (Hz) | 3031.5837            |
|                        |                      | Temperature (degree C) | 22.623                                                              |                      |                      |

Compound10pp.esp

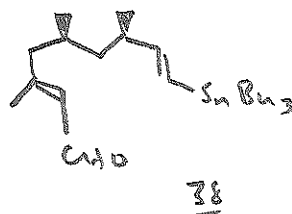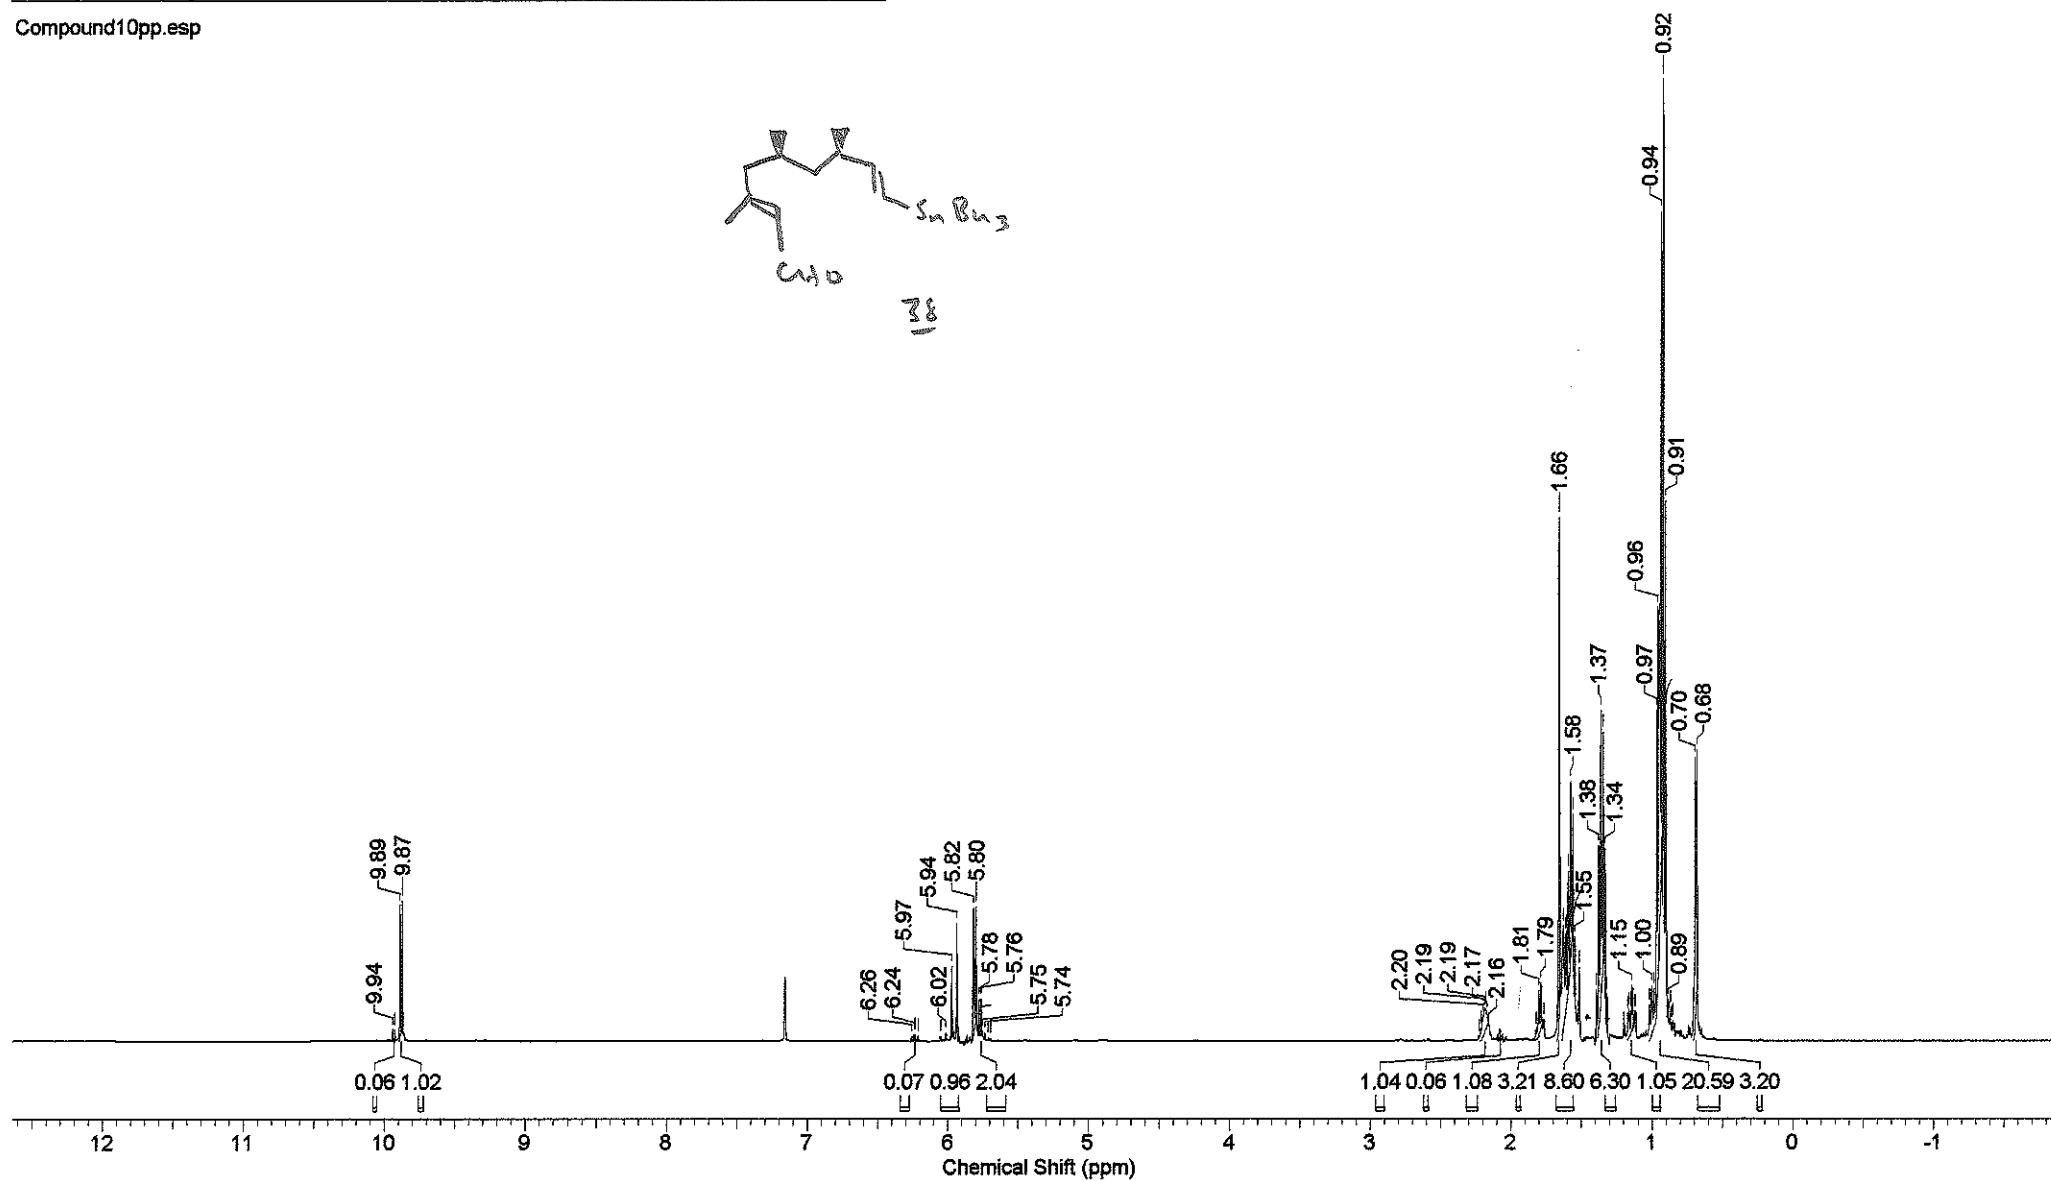

|                        |                      |                        |                                                                     |                      |                      |
|------------------------|----------------------|------------------------|---------------------------------------------------------------------|----------------------|----------------------|
| Acquisition Time (sec) | 1.1010               | Comment                | MWF026pc mCARBON C6D6 /opt/bruk500data/2011/May ejt 3               | Date                 | 03 May 2011 09:57:20 |
| Date Stamp             | 03 May 2011 09:57:20 | File Name              | F:\Chemistry\Year 3 data\NMR data\Data\Compound 10\WWE058pc_000001r |                      |                      |
| Frequency (MHz)        | 125.76               | Nucleus                | <sup>13</sup> C                                                     | Number of Transients | 256                  |
| Original Points Count  | 32768                | Owner                  | vnmr1                                                               | Points Count         | 32768                |
| Receiver Gain          | 512.00               | SW(cyclical) (Hz)      | 29761.90                                                            | Solvent              | BENZENE-d6           |
| Sweep Width (Hz)       | 29761.00             | Temperature (degree C) | 23.116                                                              | Pulse Sequence       | zgpg30               |
|                        |                      |                        |                                                                     | Spectrum Offset (Hz) | 12654.2275           |

Compound10pc.esp

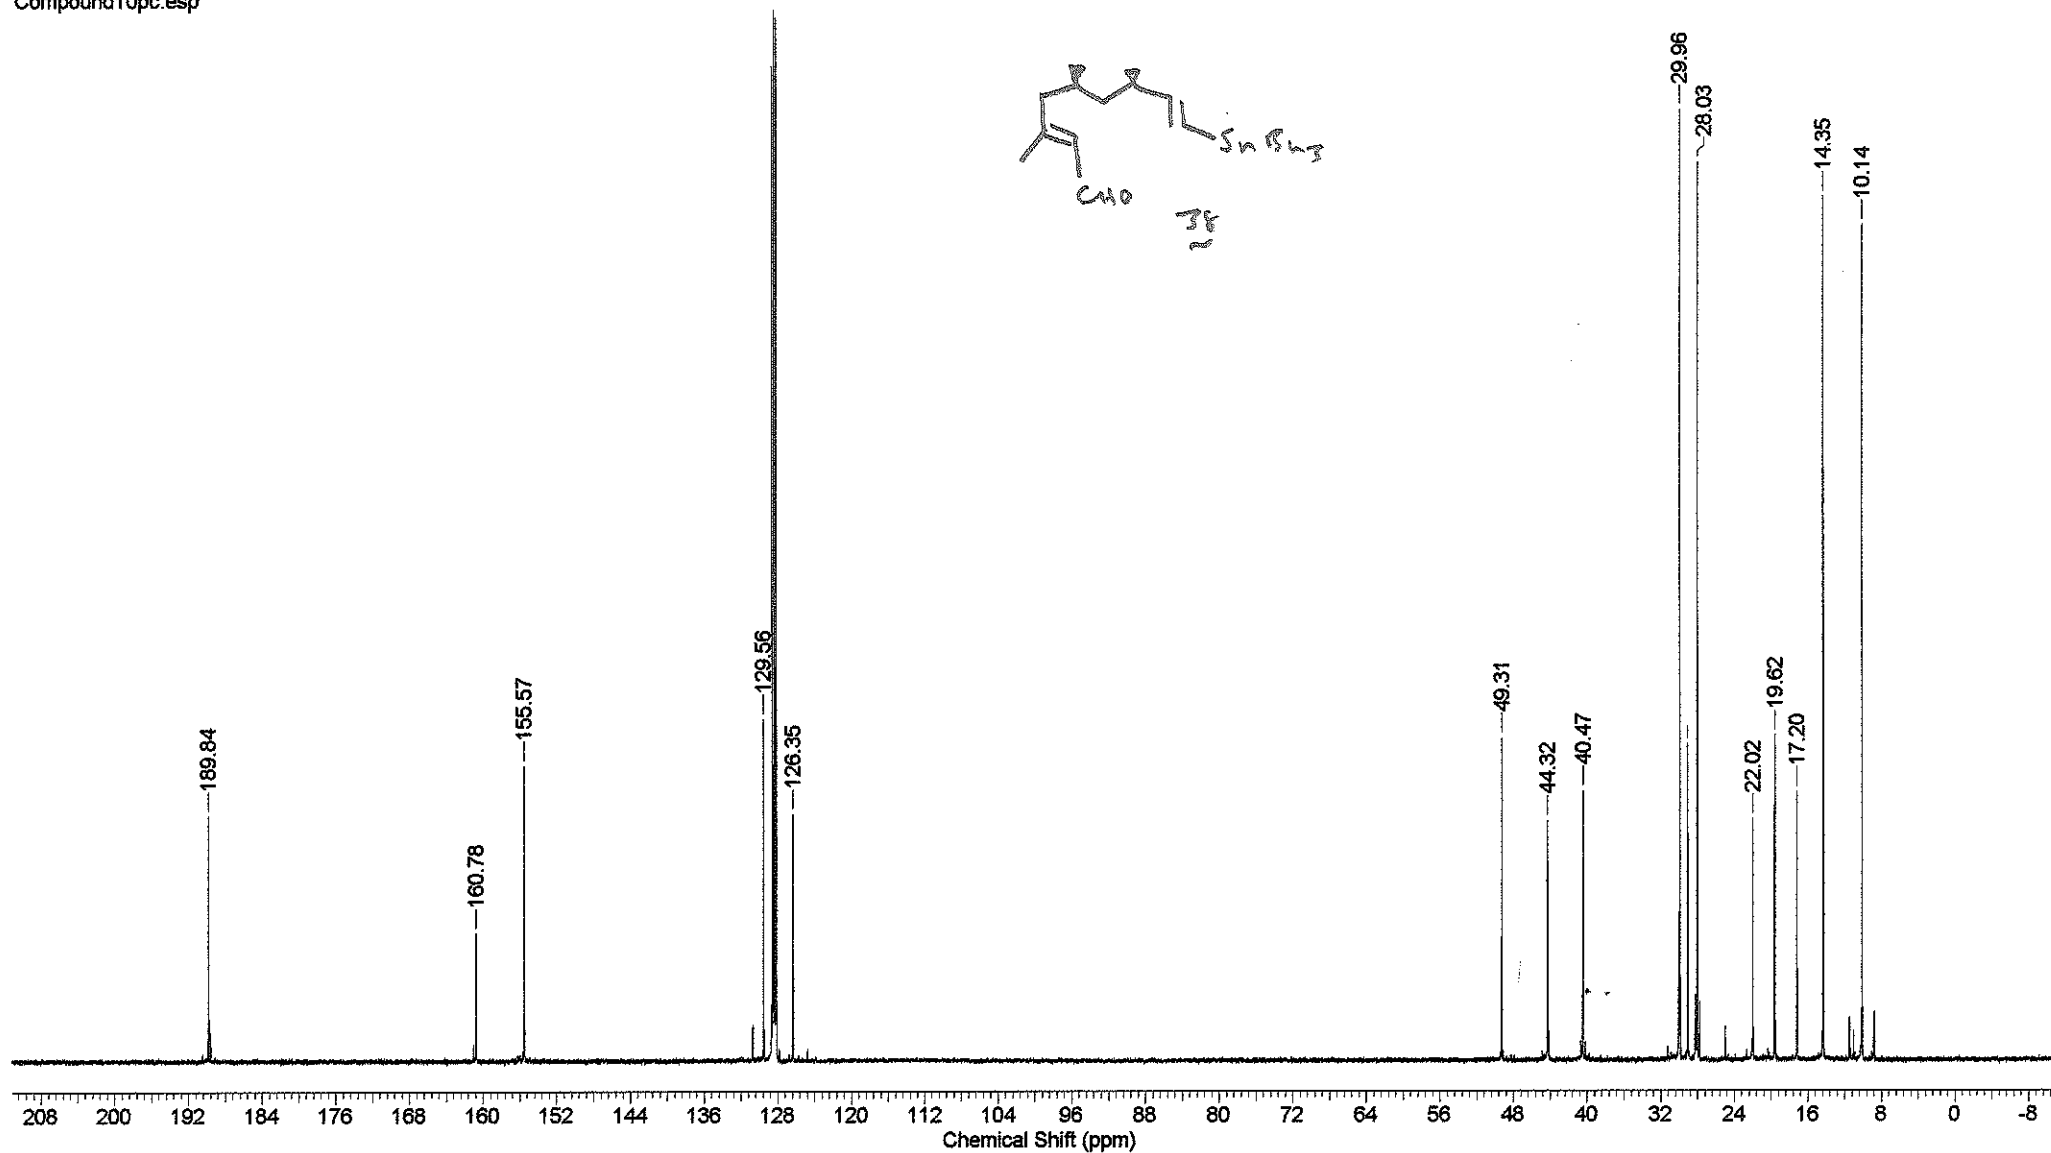

|                        |                      |                        |                                                                     |                      |                      |
|------------------------|----------------------|------------------------|---------------------------------------------------------------------|----------------------|----------------------|
| Acquisition Time (sec) | 3.1719               | Comment                | MWF029pp mPROTON C6D6 /opt/bruk500data/2011/May ejt 5               | Date                 | 10 May 2011 08:57:36 |
| Date Stamp             | 10 May 2011 08:57:36 | File Name              | F:\Chemistry\Year 3 data\NMR data\Data\Compound 11\MWF029pp_000001r |                      |                      |
| Frequency (MHz)        | 500.13               | Nucleus                | <sup>1</sup> H                                                      | Number of Transients | 16                   |
| Original Points Count  | 32768                | Owner                  | vnmr1                                                               | Points Count         | 32768                |
| Receiver Gain          | 9.00                 | SW(cyclical) (Hz)      | 10330.58                                                            | Pulse Sequence       | zg30b                |
| Sweep Width (Hz)       | 10330.26             | Solvent                | BENZENE-d6                                                          | Spectrum Offset (Hz) | 3031.2683            |
|                        |                      | Temperature (degree C) | 25.187                                                              |                      |                      |

Compound11pp.esp

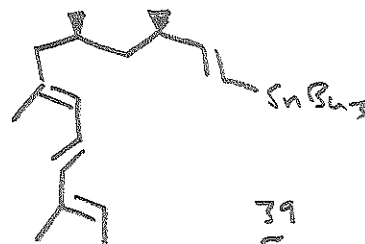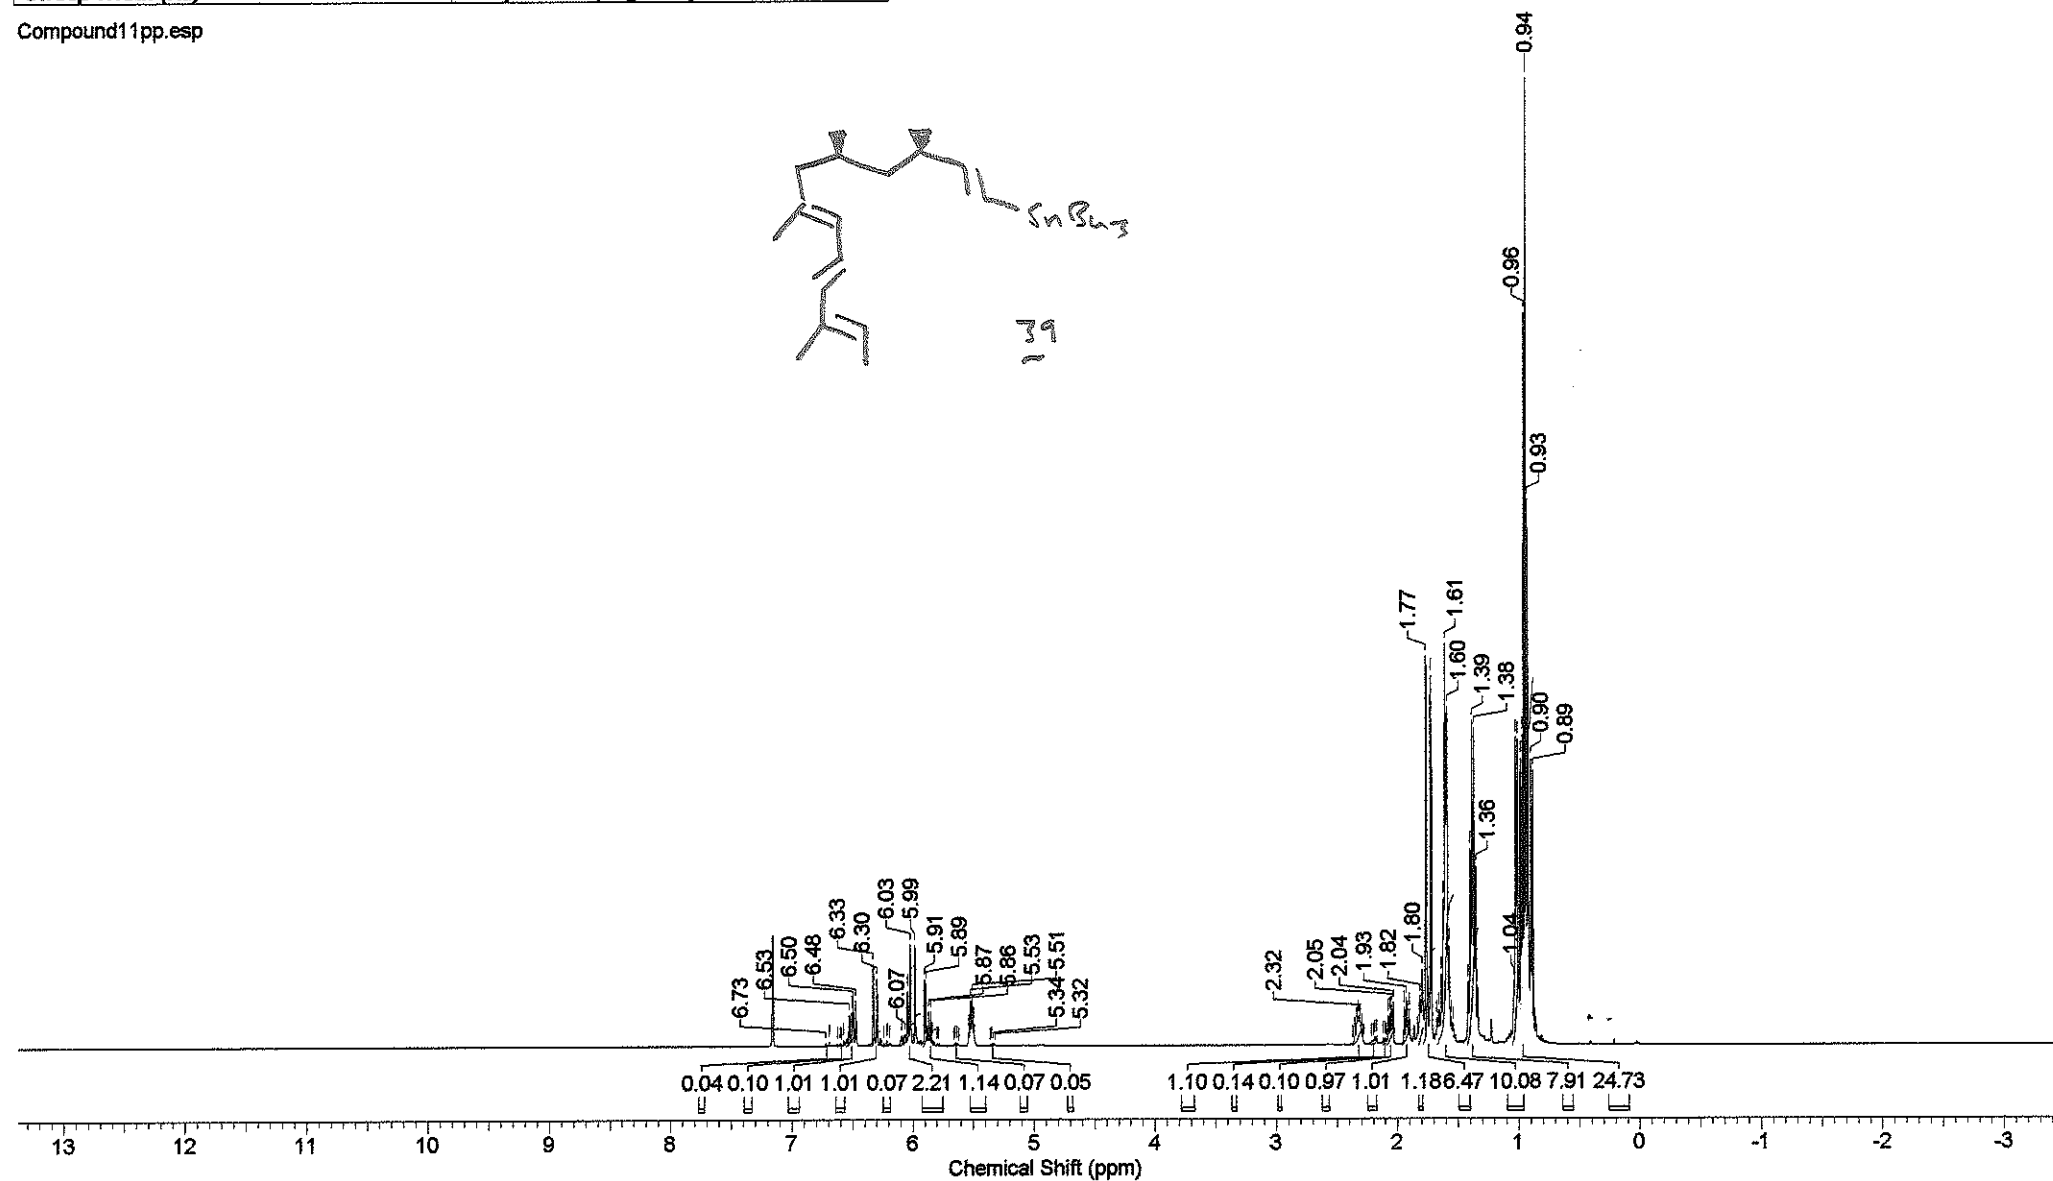

|                        |                      |                        |                                                                     |                      |                      |
|------------------------|----------------------|------------------------|---------------------------------------------------------------------|----------------------|----------------------|
| Acquisition Time (sec) | 1.1010               | Comment                | MWF029pc mCARBON C6D6 /opt/bruk500data/2011/May ejt 5               | Date                 | 10 May 2011 09:10:24 |
| Date Stamp             | 10 May 2011 09:10:24 | File Name              | F:\Chemistry\Year 3 data\NMR data\Data\Compound 11\MWF029pc_000001r |                      |                      |
| Frequency (MHz)        | 125.76               | Nucleus                | 13C                                                                 | Number of Transients | 256                  |
| Original Points Count  | 32768                | Owner                  | vnmr1                                                               | Points Count         | 32768                |
| Receiver Gain          | 512.00               | SW(cyclical) (Hz)      | 29761.90                                                            | Pulse Sequence       | zgpg30               |
| Sweep Width (Hz)       | 29761.00             | Temperature (degree C) | 25.187                                                              | Spectrum Offset (Hz) | 12654.2275           |

Compound11pc.esp

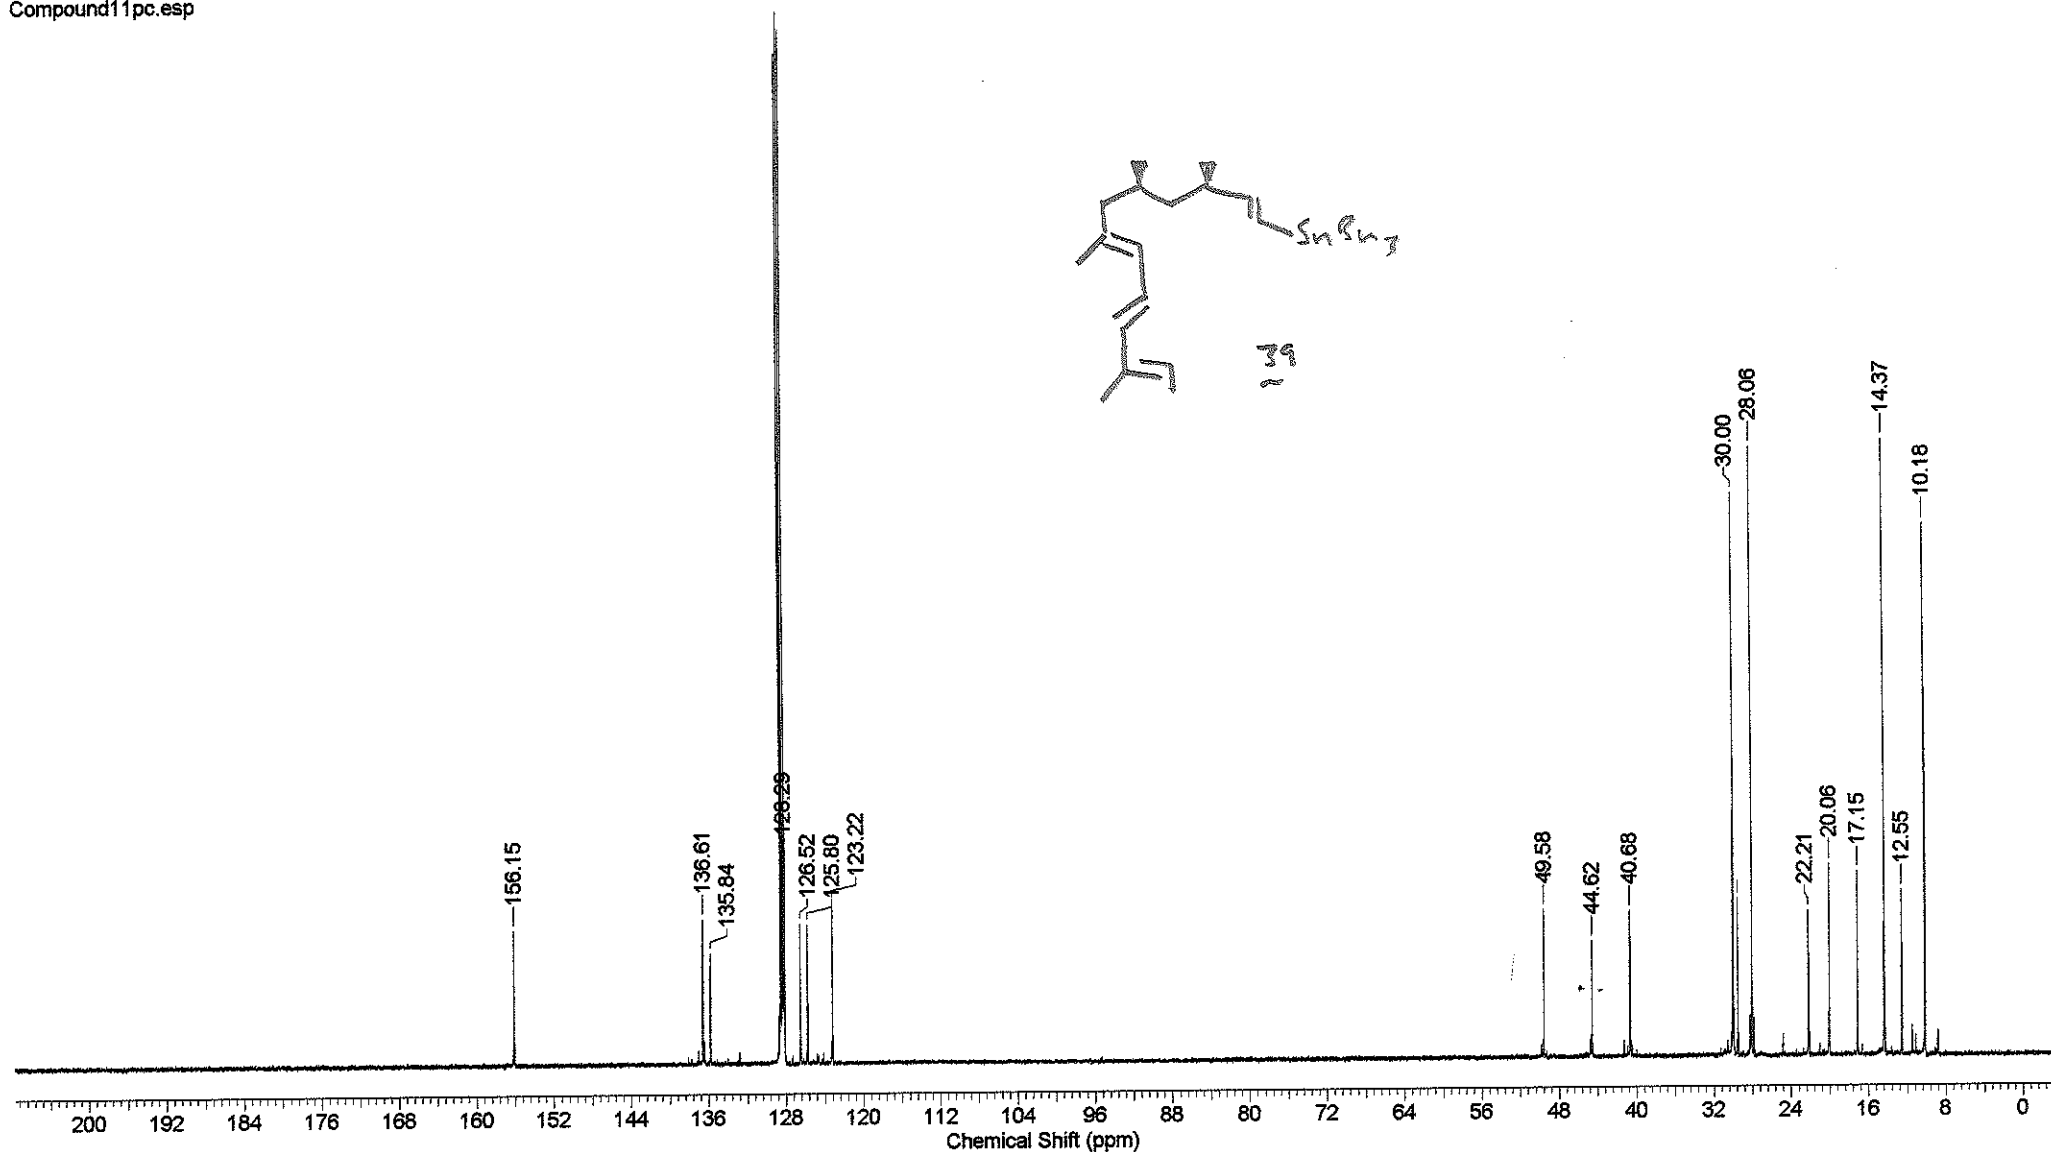



|                        |                      |                        |                                                                     |                      |                      |
|------------------------|----------------------|------------------------|---------------------------------------------------------------------|----------------------|----------------------|
| Acquisition Time (sec) | 3.9649               | Comment                | MWF066pp mPROTON C6D6 {e:\bruk400data\2011\Jun} ejt 21              | Date                 | 30 Jun 2011 12:48:00 |
| Date Stamp             | 30 Jun 2011 12:48:00 | File Name              | F:\Chemistry\Year 3 data\NMR data\Data\Compound 19\MWF066pp_000001r | Origin               | AV400                |
| Frequency (MHz)        | 400.13               | Nucleus                | 1H                                                                  | Number of Transients | 16                   |
| Original Points Count  | 32768                | Owner                  | Administrator                                                       | Points Count         | 32768                |
| Receiver Gain          | 22.60                | SW(cyclical) (Hz)      | 8264.46                                                             | Pulse Sequence       | zg30b                |
| Sweep Width (Hz)       | 8264.21              | Temperature (degree C) | 20.900                                                              | Spectrum Offset (Hz) | 2425.7046            |

Compound19pp.esp

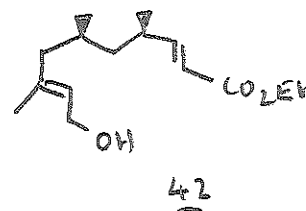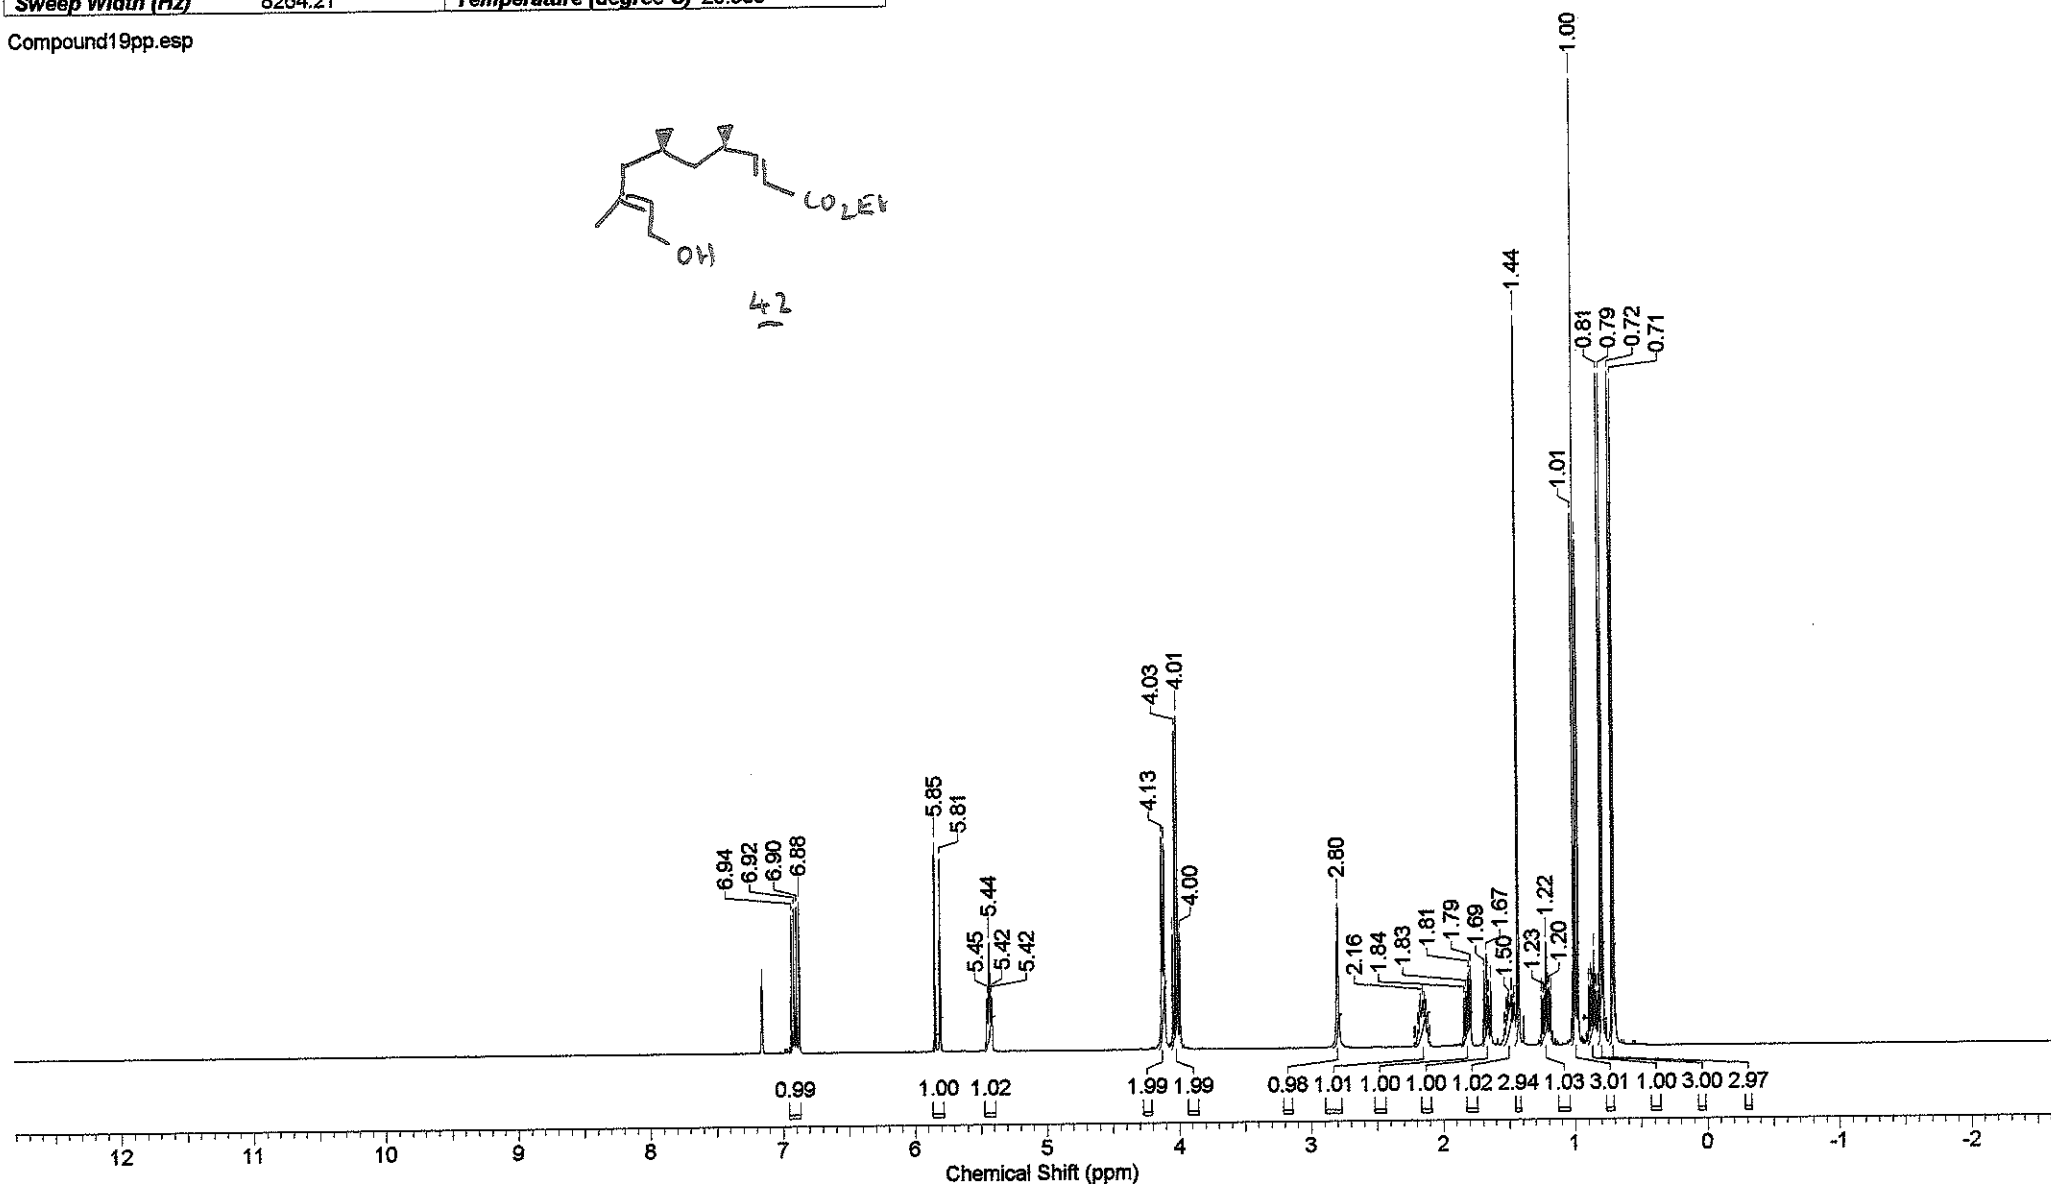

|                        |                      |                        |                                                                     |                      |                      |
|------------------------|----------------------|------------------------|---------------------------------------------------------------------|----------------------|----------------------|
| Acquisition Time (sec) | 1.0835               | Comment                | MWF066pc mCARBON C6D6 {e:\bruk400data\2011\Jun} ejt 18              | Date                 | 30 Jun 2011 12:39:28 |
| Date Stamp             | 30 Jun 2011 12:39:28 | File Name              | F:\Chemistry\Year 3 data\NMR data\Data\Compound 19\MWF066pc_000001r | Number of Transients | 256                  |
| Frequency (MHz)        | 100.61               | Nucleus                | 13C                                                                 | Origin               | AV400                |
| Original Points Count  | 32768                | Owner                  | Administrator                                                       | Pulse Sequence       | zgpg30               |
| Receiver Gain          | 512.00               | SW(cyclical) (Hz)      | 30241.94                                                            | Solvent              | BENZENE-d6           |
| Spectrum Offset (Hz)   | 11395.3301           | Temperature (degree C) | 21.500                                                              |                      |                      |
| Sweep Width (Hz)       | 30241.01             |                        |                                                                     |                      |                      |

Compound19pc.esp

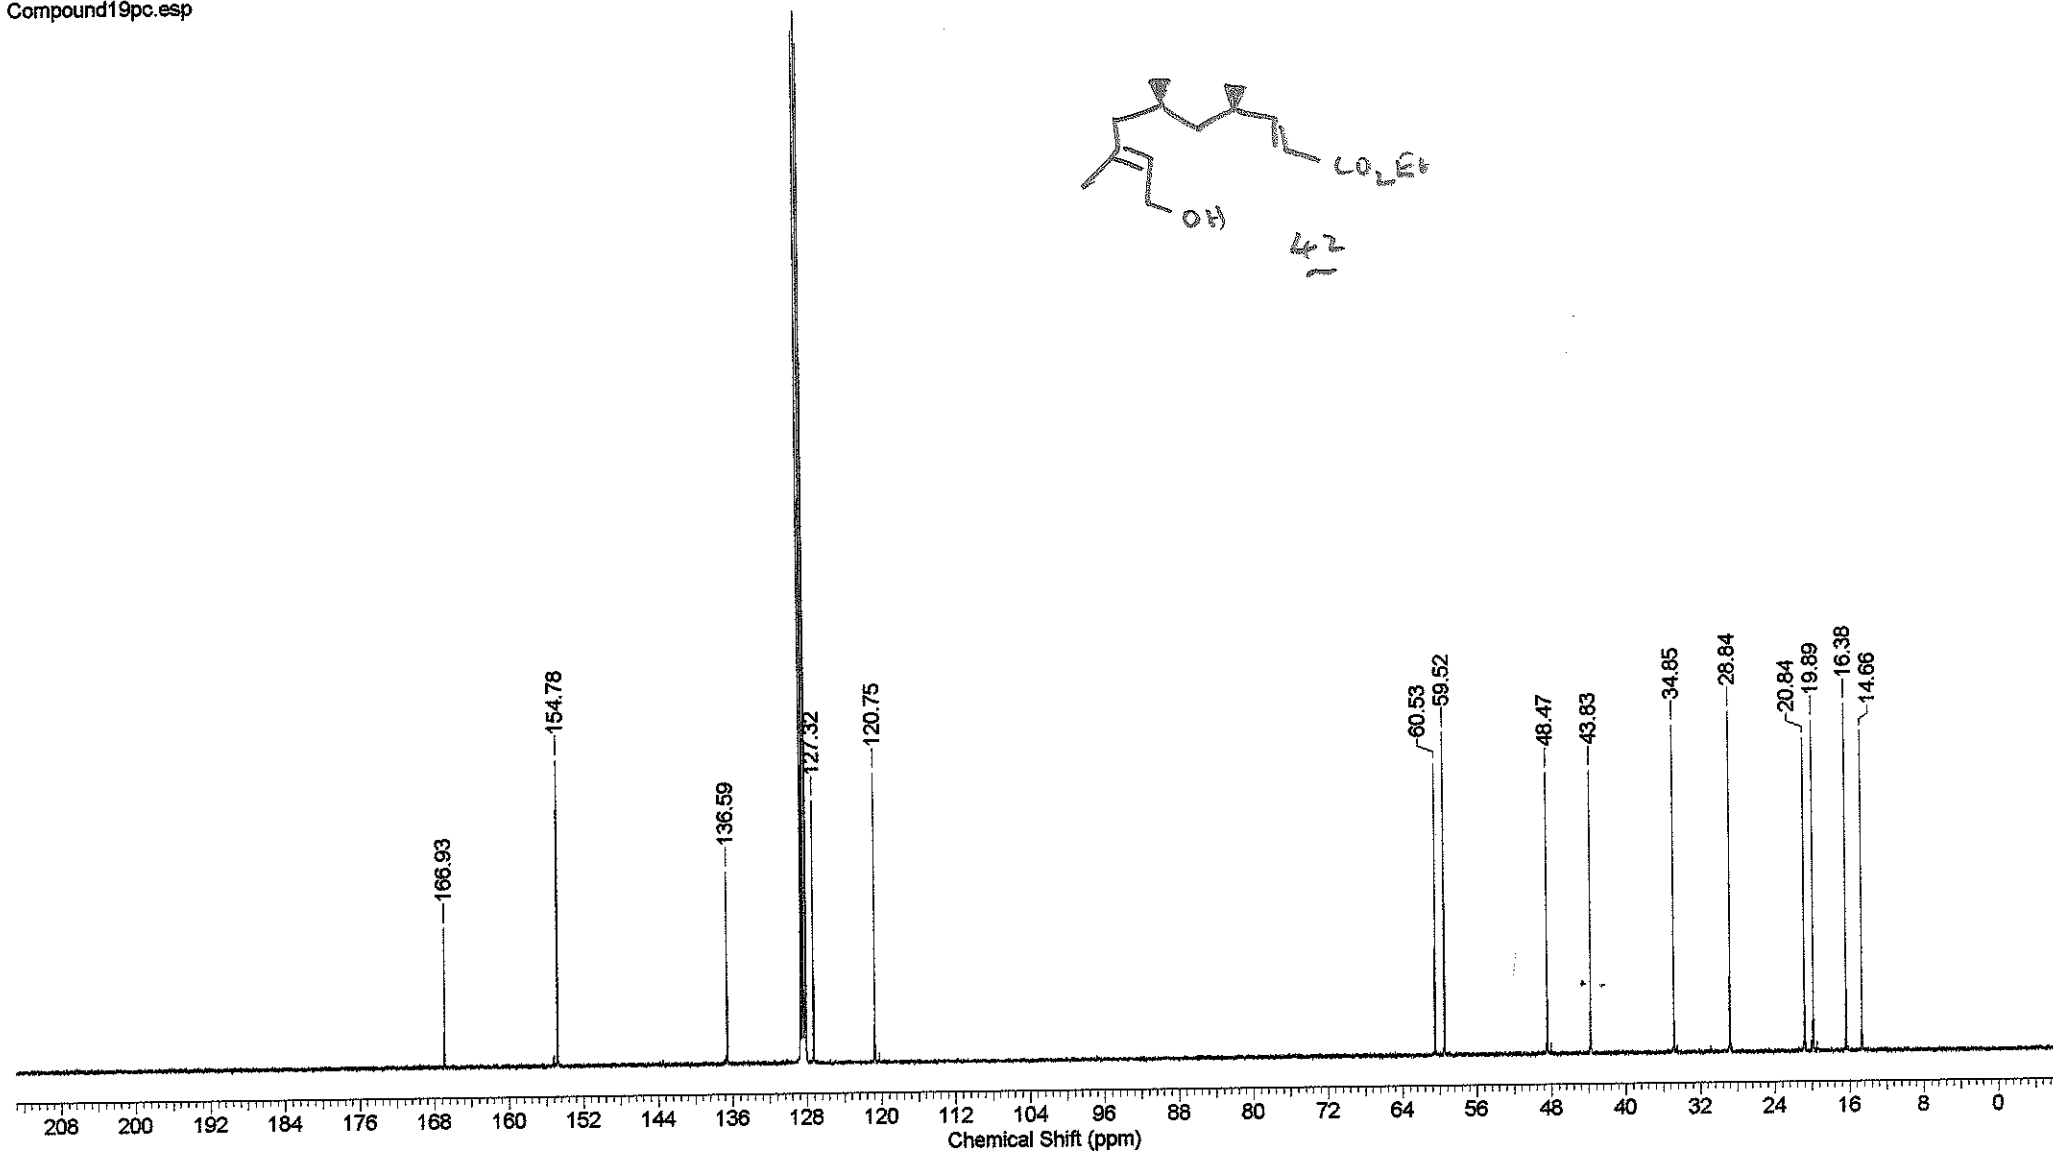

|                               |                      |                               |                                                        |                             |                                                                     |
|-------------------------------|----------------------|-------------------------------|--------------------------------------------------------|-----------------------------|---------------------------------------------------------------------|
| <b>Acquisition Time (sec)</b> | 3.9649               | <b>Comment</b>                | MWF048pp mPROTON C6D6 {e:\bruk400data\2011\May} ejt 36 | <b>Date</b>                 | 01 Jun 2011 06:38:56                                                |
| <b>Date Stamp</b>             | 01 Jun 2011 06:38:56 |                               |                                                        | <b>File Name</b>            | F:\Chemistry\Year 3 data\NMR data\Data\Compound 21\MWF048pp_000001r |
| <b>Frequency (MHz)</b>        | 400.13               | <b>Nucleus</b>                | <sup>1</sup> H                                         | <b>Number of Transients</b> | 16                                                                  |
| <b>Original Points Count</b>  | 32768                | <b>Owner</b>                  | Administrator                                          | <b>Points Count</b>         | 32768                                                               |
| <b>Receiver Gain</b>          | 36.00                | <b>SW(cyclical) (Hz)</b>      | 8264.46                                                | <b>Pulse Sequence</b>       | zg30b                                                               |
| <b>Sweep Width (Hz)</b>       | 8264.21              | <b>Temperature (degree C)</b> | 19.200                                                 | <b>Spectrum Offset (Hz)</b> | 2432.7671                                                           |

Compound21pp.esp

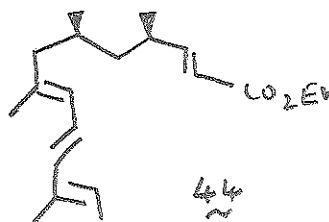

(2E,8E,10E,12E) : (2E,8E,10Z,12E) : (2E,8E,10E,12Z)  
= 87:6:7

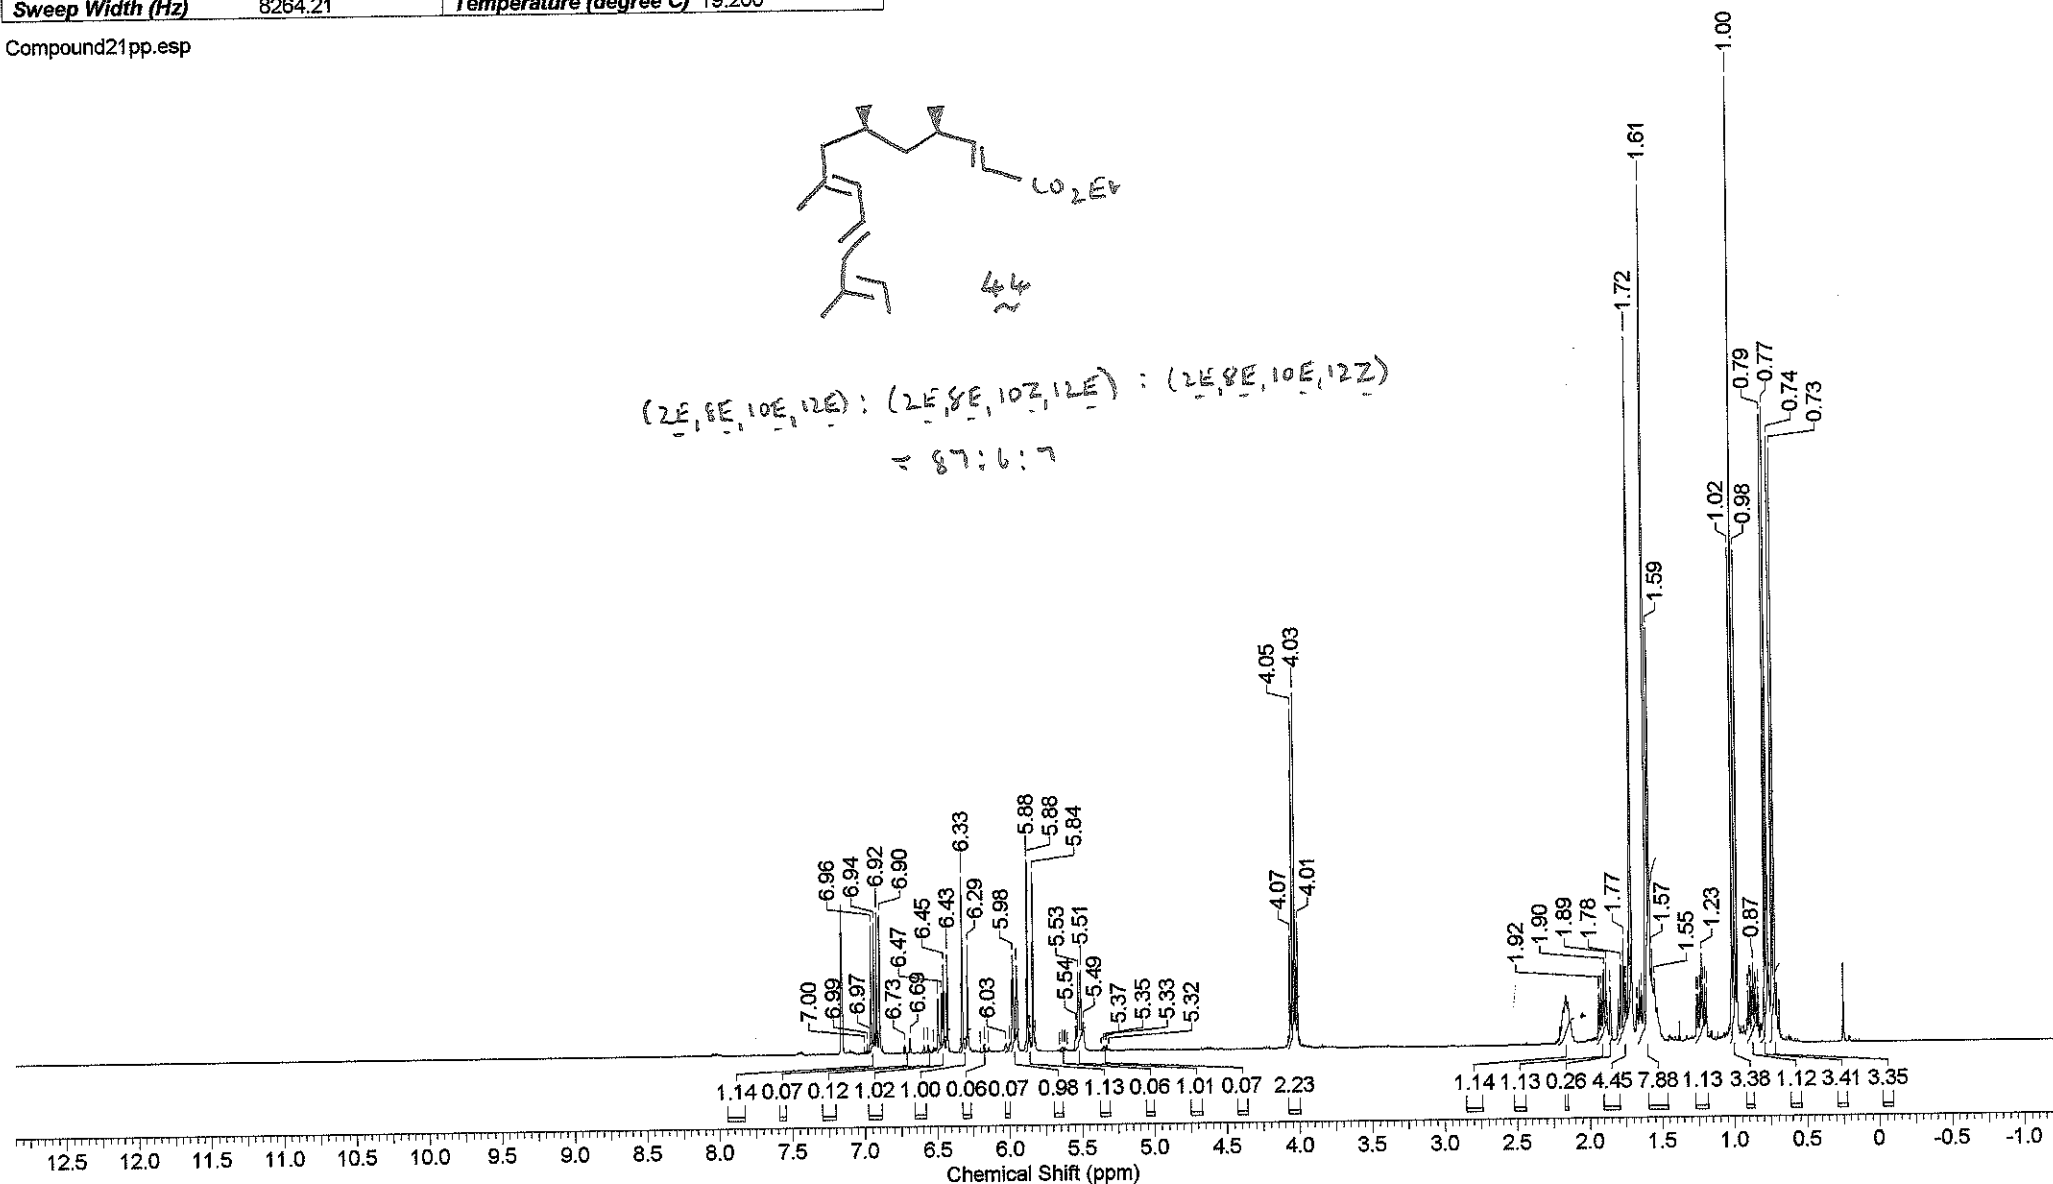

|                        |                      |                        |                                                                      |                      |                      |
|------------------------|----------------------|------------------------|----------------------------------------------------------------------|----------------------|----------------------|
| Acquisition Time (sec) | 3.9649               | Comment                | MWVF048pp mPROTON C6D6 {e:\bruk400data\2011\May} ejt 36              | Date                 | 01 Jun 2011 06:38:56 |
| Date Stamp             | 01 Jun 2011 06:38:56 | File Name              | F:\Chemistry\Year 3 data\NMR data\Data\Compound 21\MWVF048pp_000001r |                      |                      |
| Frequency (MHz)        | 400.13               | Nucleus                | 1H                                                                   | Number of Transients | 16                   |
| Original Points Count  | 32768                | Owner                  | Administrator                                                        | Points Count         | 32768                |
| Receiver Gain          | 36.00                | SW(cyclical) (Hz)      | 8264.46                                                              | Solvent              | BENZENE-d6           |
| Sweep Width (Hz)       | 8264.21              | Temperature (degree C) | 19.200                                                               | Pulse Sequence       | zg30b                |
|                        |                      |                        |                                                                      | Spectrum Offset (Hz) | 2432.7671            |

Compound21pp.esp

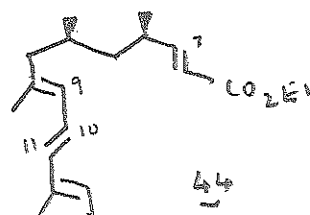

$$(2E,8E,10E,12E) : (2E,8E,10Z,12E) : (2E,8E,10E,12Z) \\ = 87.6:7$$

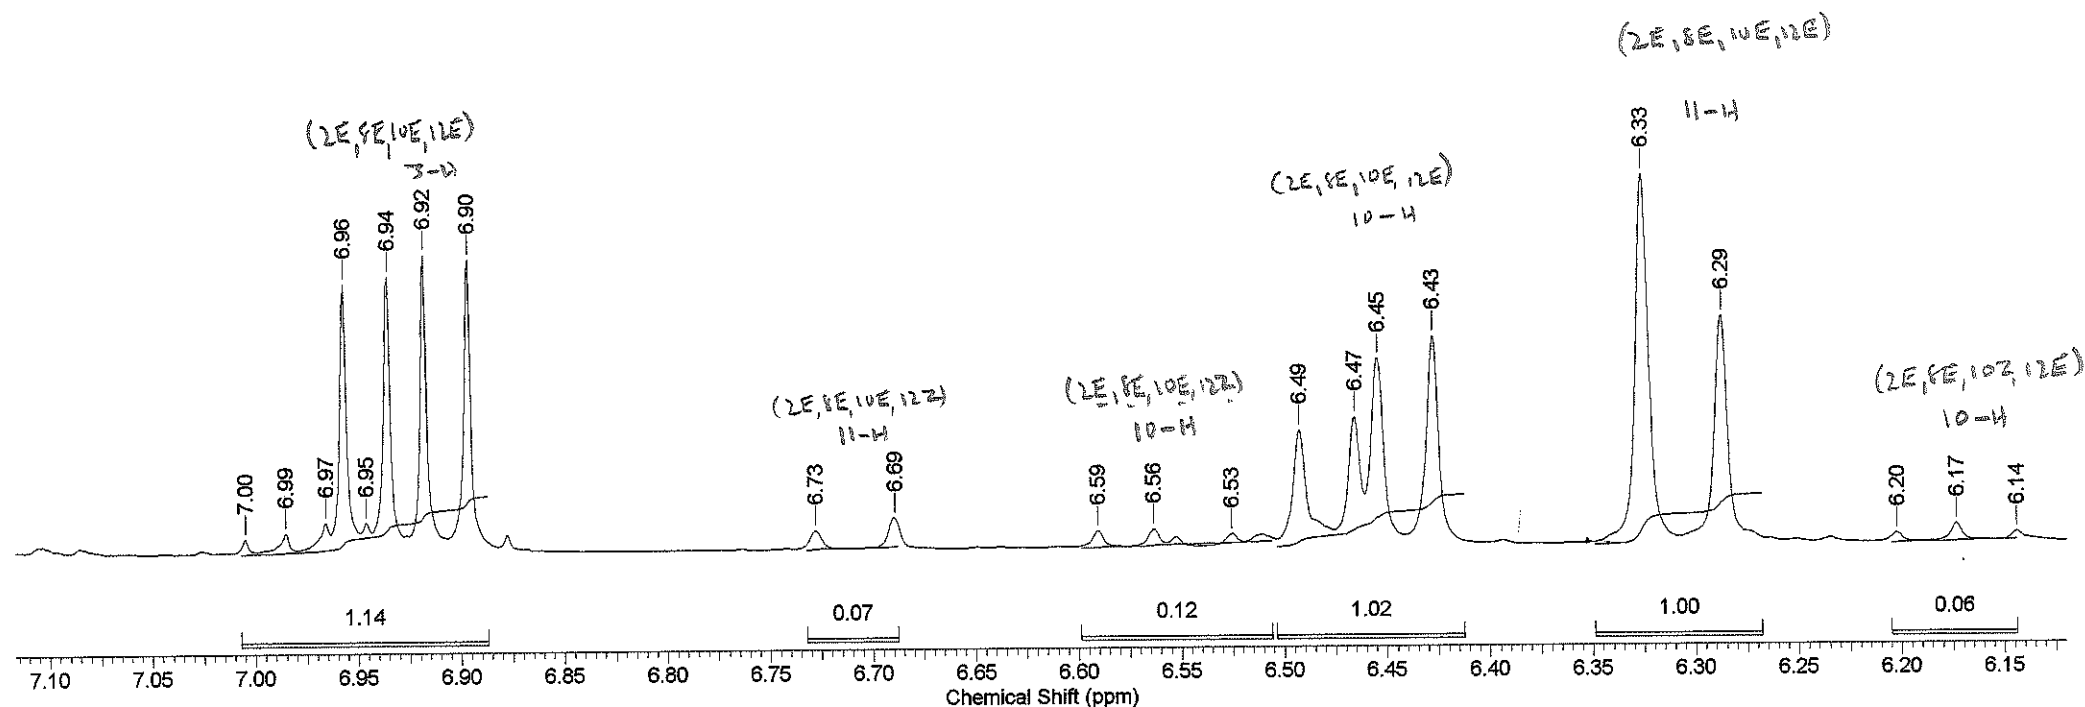

|                               |                      |                               |                                                                     |                             |                      |
|-------------------------------|----------------------|-------------------------------|---------------------------------------------------------------------|-----------------------------|----------------------|
| <b>Acquisition Time (sec)</b> | 1.0835               | <b>Comment</b>                | MWF048pc mCARBON C6D6 {e:\bruk400data\2011\May} ejt 36              | <b>Date</b>                 | 01 Jun 2011 07:10:56 |
| <b>Date Stamp</b>             | 01 Jun 2011 07:10:56 | <b>File Name</b>              | F:\Chemistry\Year 3 data\NMR data\Data\Compound 21\MWF048pc_000001r |                             |                      |
| <b>Frequency (MHz)</b>        | 100.61               | <b>Nucleus</b>                | 13C                                                                 | <b>Number of Transients</b> | 256                  |
| <b>Original Points Count</b>  | 32768                | <b>Owner</b>                  | Administrator                                                       | <b>Points Count</b>         | 32768                |
| <b>Receiver Gain</b>          | 512.00               | <b>SW(cyclical) (Hz)</b>      | 30241.94                                                            | <b>Solvent</b>              | BENZENE-d6           |
| <b>Sweep Width (Hz)</b>       | 30241.01             | <b>Temperature (degree C)</b> | 20.100                                                              | <b>Pulse Sequence</b>       | zgpg30               |
|                               |                      |                               |                                                                     | <b>Spectrum Offset (Hz)</b> | 11397.1934           |

Compound21pc.esp

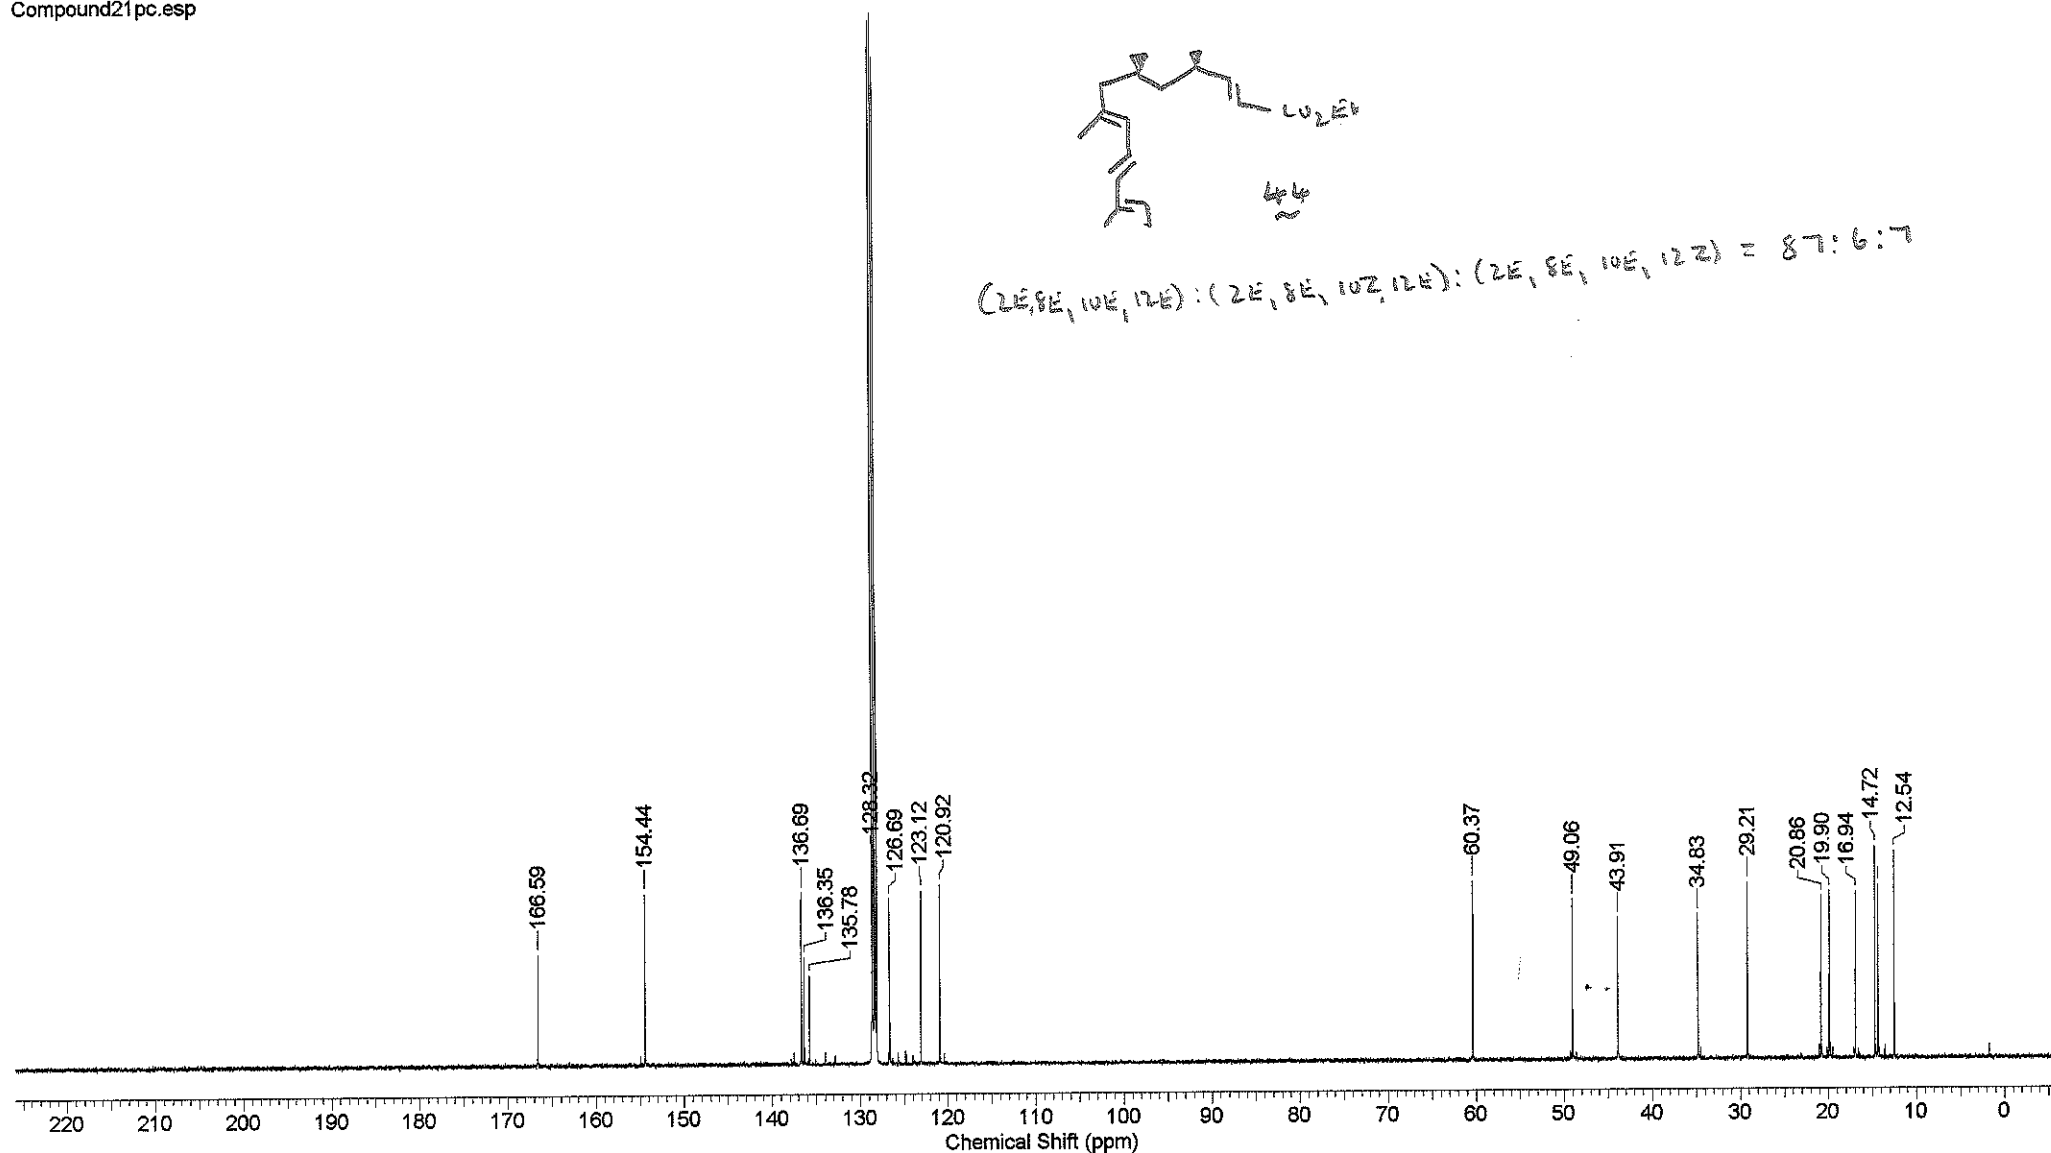

|                               |                      |                               |                                                        |                                                                      |                      |
|-------------------------------|----------------------|-------------------------------|--------------------------------------------------------|----------------------------------------------------------------------|----------------------|
| <b>Acquisition Time (sec)</b> | 3.9649               | <b>Comment</b>                | MWG064pp mPROTON C6D6 {e:\bruk400data\2012\Apr} ejt 18 | <b>Date</b>                                                          | 23 Apr 2012 08:51:12 |
| <b>Date Stamp</b>             | 23 Apr 2012 08:51:12 |                               | <b>File Name</b>                                       | F:\Chemistry\Year 3 data\NMR data\Data\Compound 25\MWVH048pp_000001r |                      |
| <b>Frequency (MHz)</b>        | 400.13               | <b>Nucleus</b>                | 1H                                                     | <b>Number of Transients</b>                                          | 16                   |
| <b>Original Points Count</b>  | 32768                | <b>Owner</b>                  | Administrator                                          | <b>Points Count</b>                                                  | 32768                |
| <b>Receiver Gain</b>          | 101.00               | <b>SW(cyclical) (Hz)</b>      | 8264.46                                                | <b>Pulse Sequence</b>                                                | zg30b                |
| <b>Sweep Width (Hz)</b>       | 8264.21              | <b>Temperature (degree C)</b> | 20.800                                                 | <b>Spectrum Offset (Hz)</b>                                          | 2426.2092            |

Compound25pp.esp

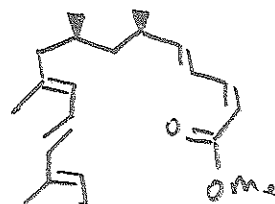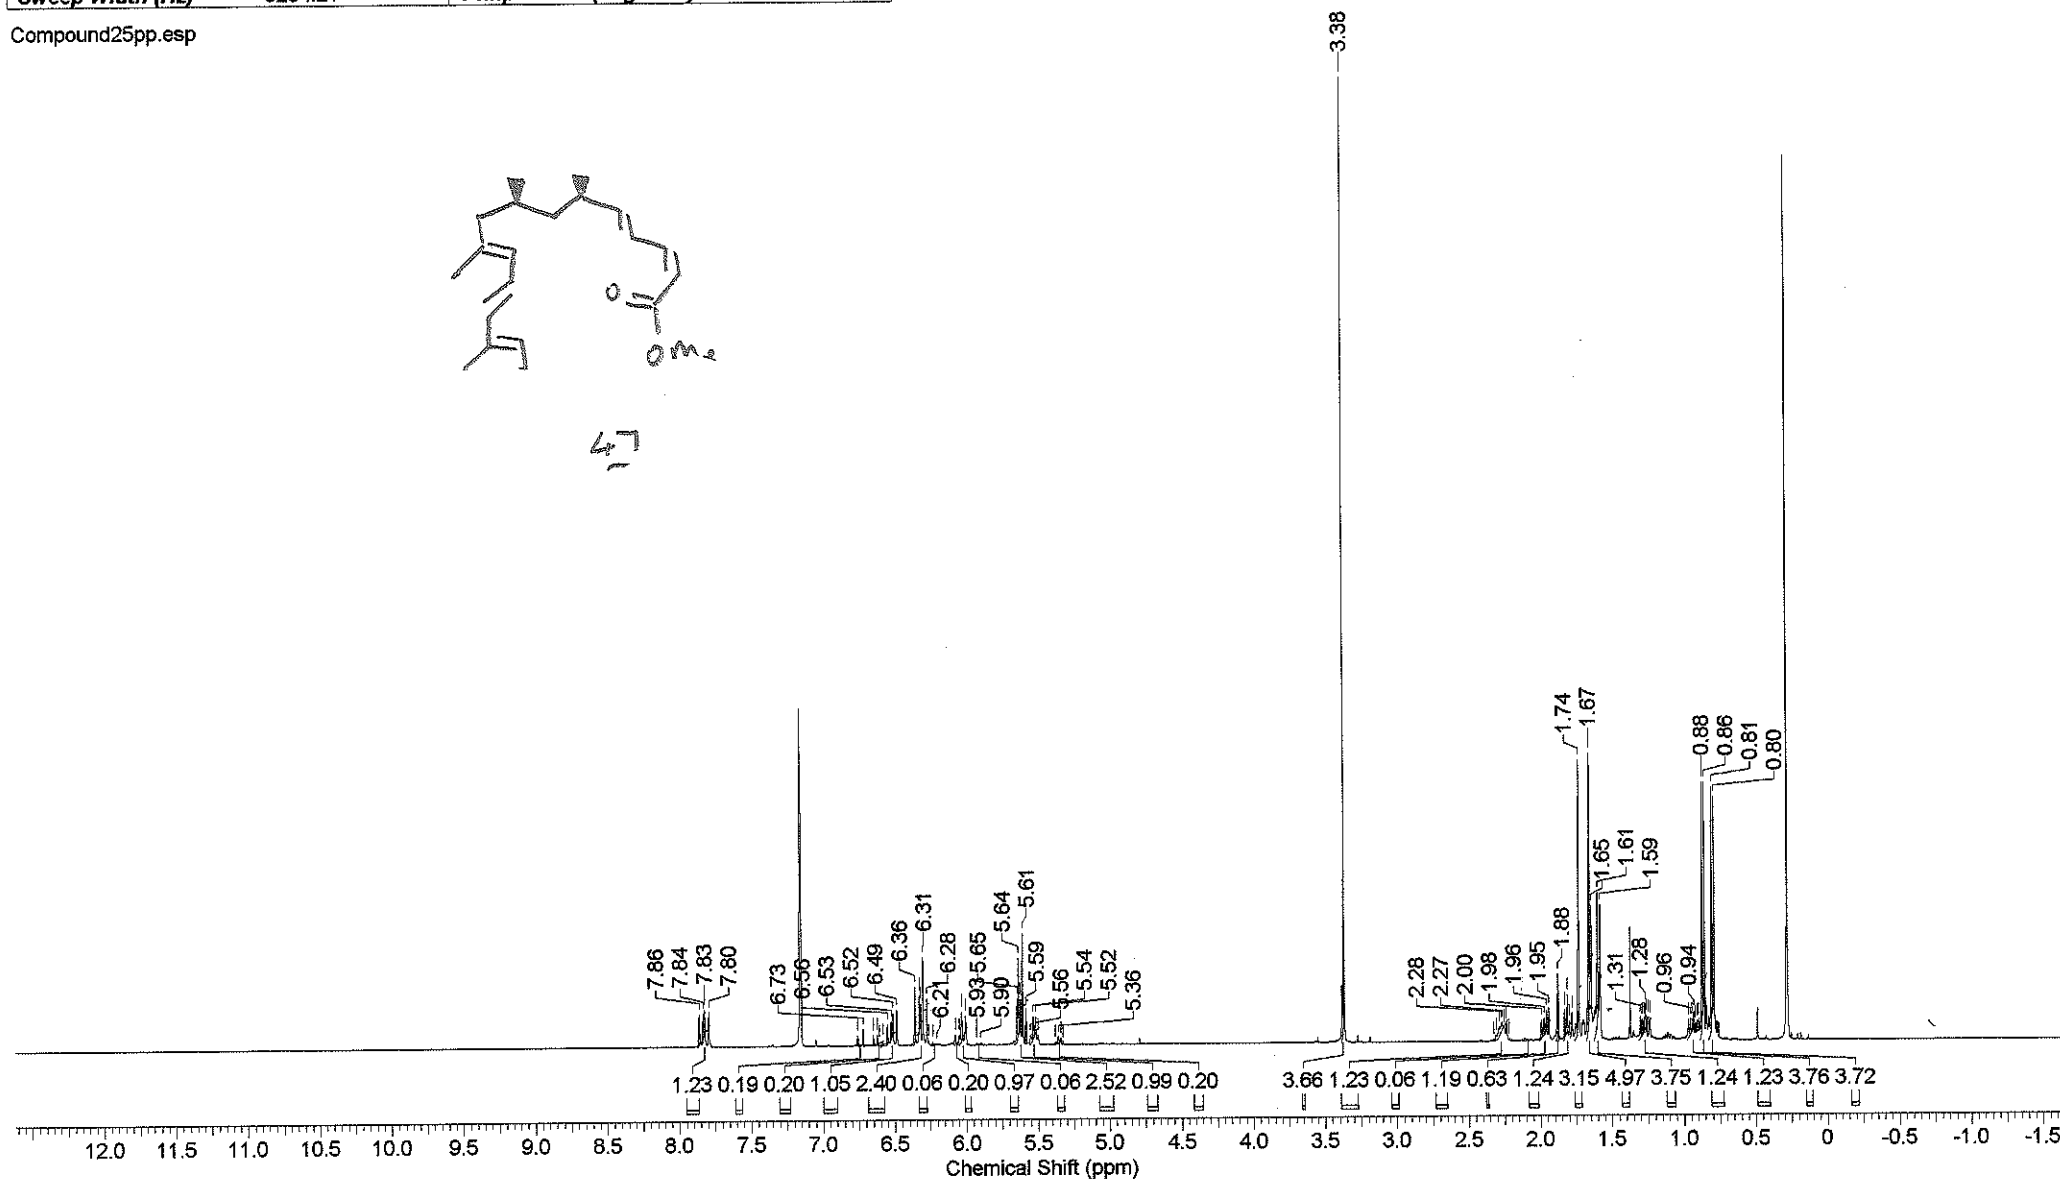

|                        |                      |                        |                                                                |                      |                      |
|------------------------|----------------------|------------------------|----------------------------------------------------------------|----------------------|----------------------|
| Acquisition Time (sec) | 1.0835               | Comment                | MWG064pc mCARBON C6D6 {e:\bruk400data\2012\Apr} ejt 18         | Date                 | 23 Apr 2012 09:12:32 |
| Date Stamp             | 23 Apr 2012 09:12:32 | File Name              | F:\Chemistry\Year 3 data\NMR data\Compound 25\MWH048pc_000001r | Origin               | AV400                |
| Frequency (MHz)        | 100.61               | Nucleus                | <sup>13</sup> C                                                | Number of Transients | 256                  |
| Original Points Count  | 32768                | Owner                  | Administrator                                                  | Points Count         | 32768                |
| Receiver Gain          | 512.00               | SW(cyclical) (Hz)      | 30241.94                                                       | Pulse Sequence       | zgpg30               |
| Sweep Width (Hz)       | 30241.01             | Temperature (degree C) | 21.600                                                         | Spectrum Offset (Hz) | 11393.5010           |

Compound25pc.esp

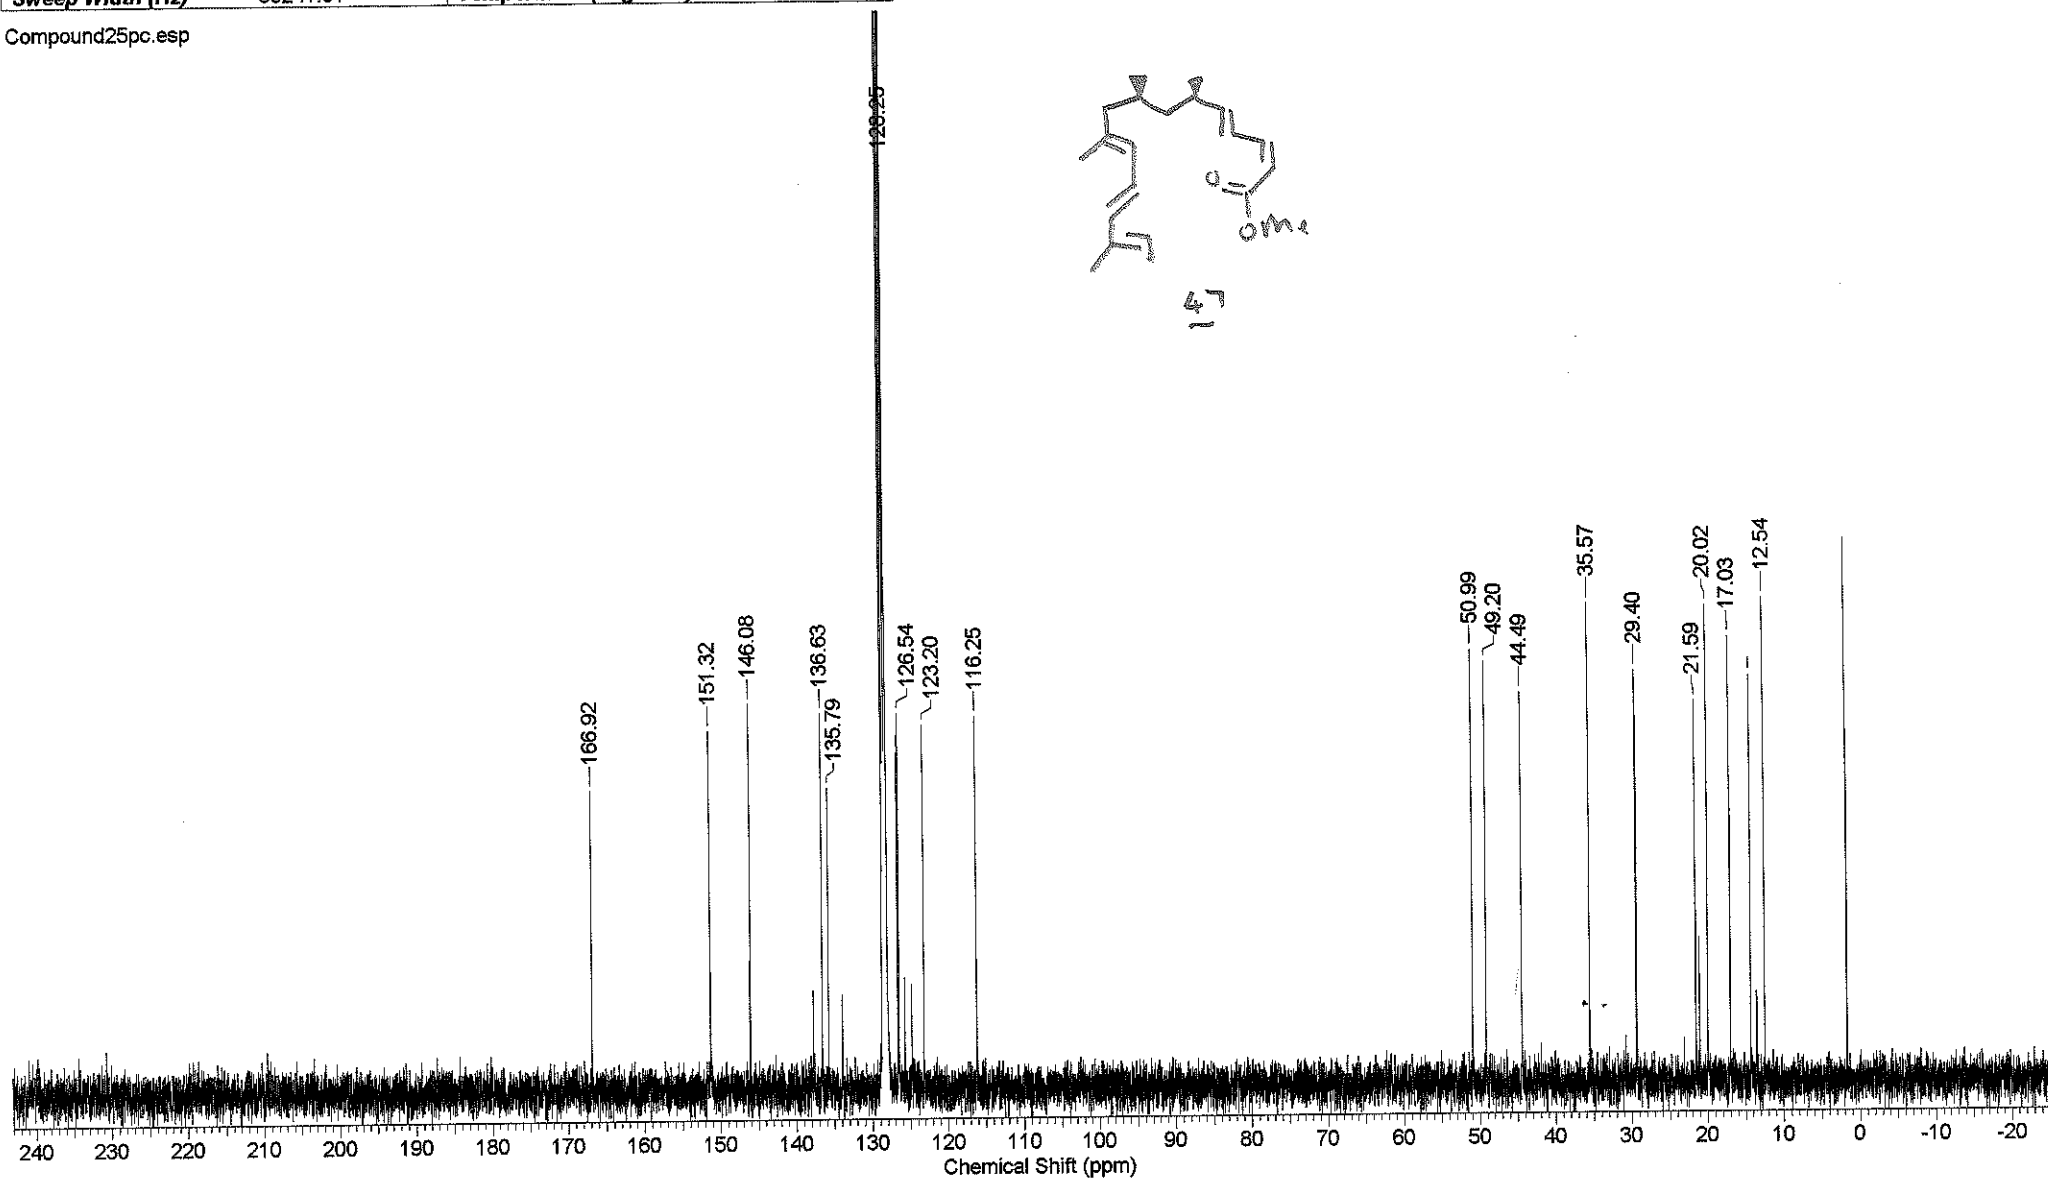

|                        |                      |                        |                                                                     |                      |                      |
|------------------------|----------------------|------------------------|---------------------------------------------------------------------|----------------------|----------------------|
| Acquisition Time (sec) | 3.1719               | Comment                | MWF036pp mPROTON C6D6 /opt/bruk500data/2011/May ejt 27              | Date                 | 17 May 2011 16:06:24 |
| Date Stamp             | 17 May 2011 16:06:24 | File Name              | F:\Chemistry\Year 3 data\NMR data\Data\Compound 28\MWF036pp_000001r |                      |                      |
| Frequency (MHz)        | 500.13               | Nucleus                | 1H                                                                  | Number of Transients | 16                   |
| Original Points Count  | 32768                | Owner                  | vnmr1                                                               | Points Count         | 32768                |
| Receiver Gain          | 50.80                | SW(cyclical) (Hz)      | 10330.58                                                            | Pulse Sequence       | zg30b                |
| Sweep Width (Hz)       | 10330.26             | Temperature (degree C) | 22.032                                                              | Spectrum Offset (Hz) | 3031.5837            |

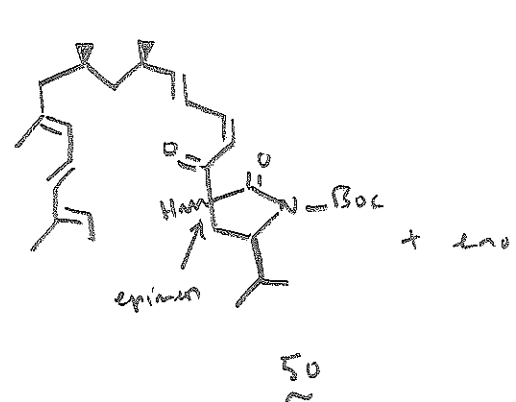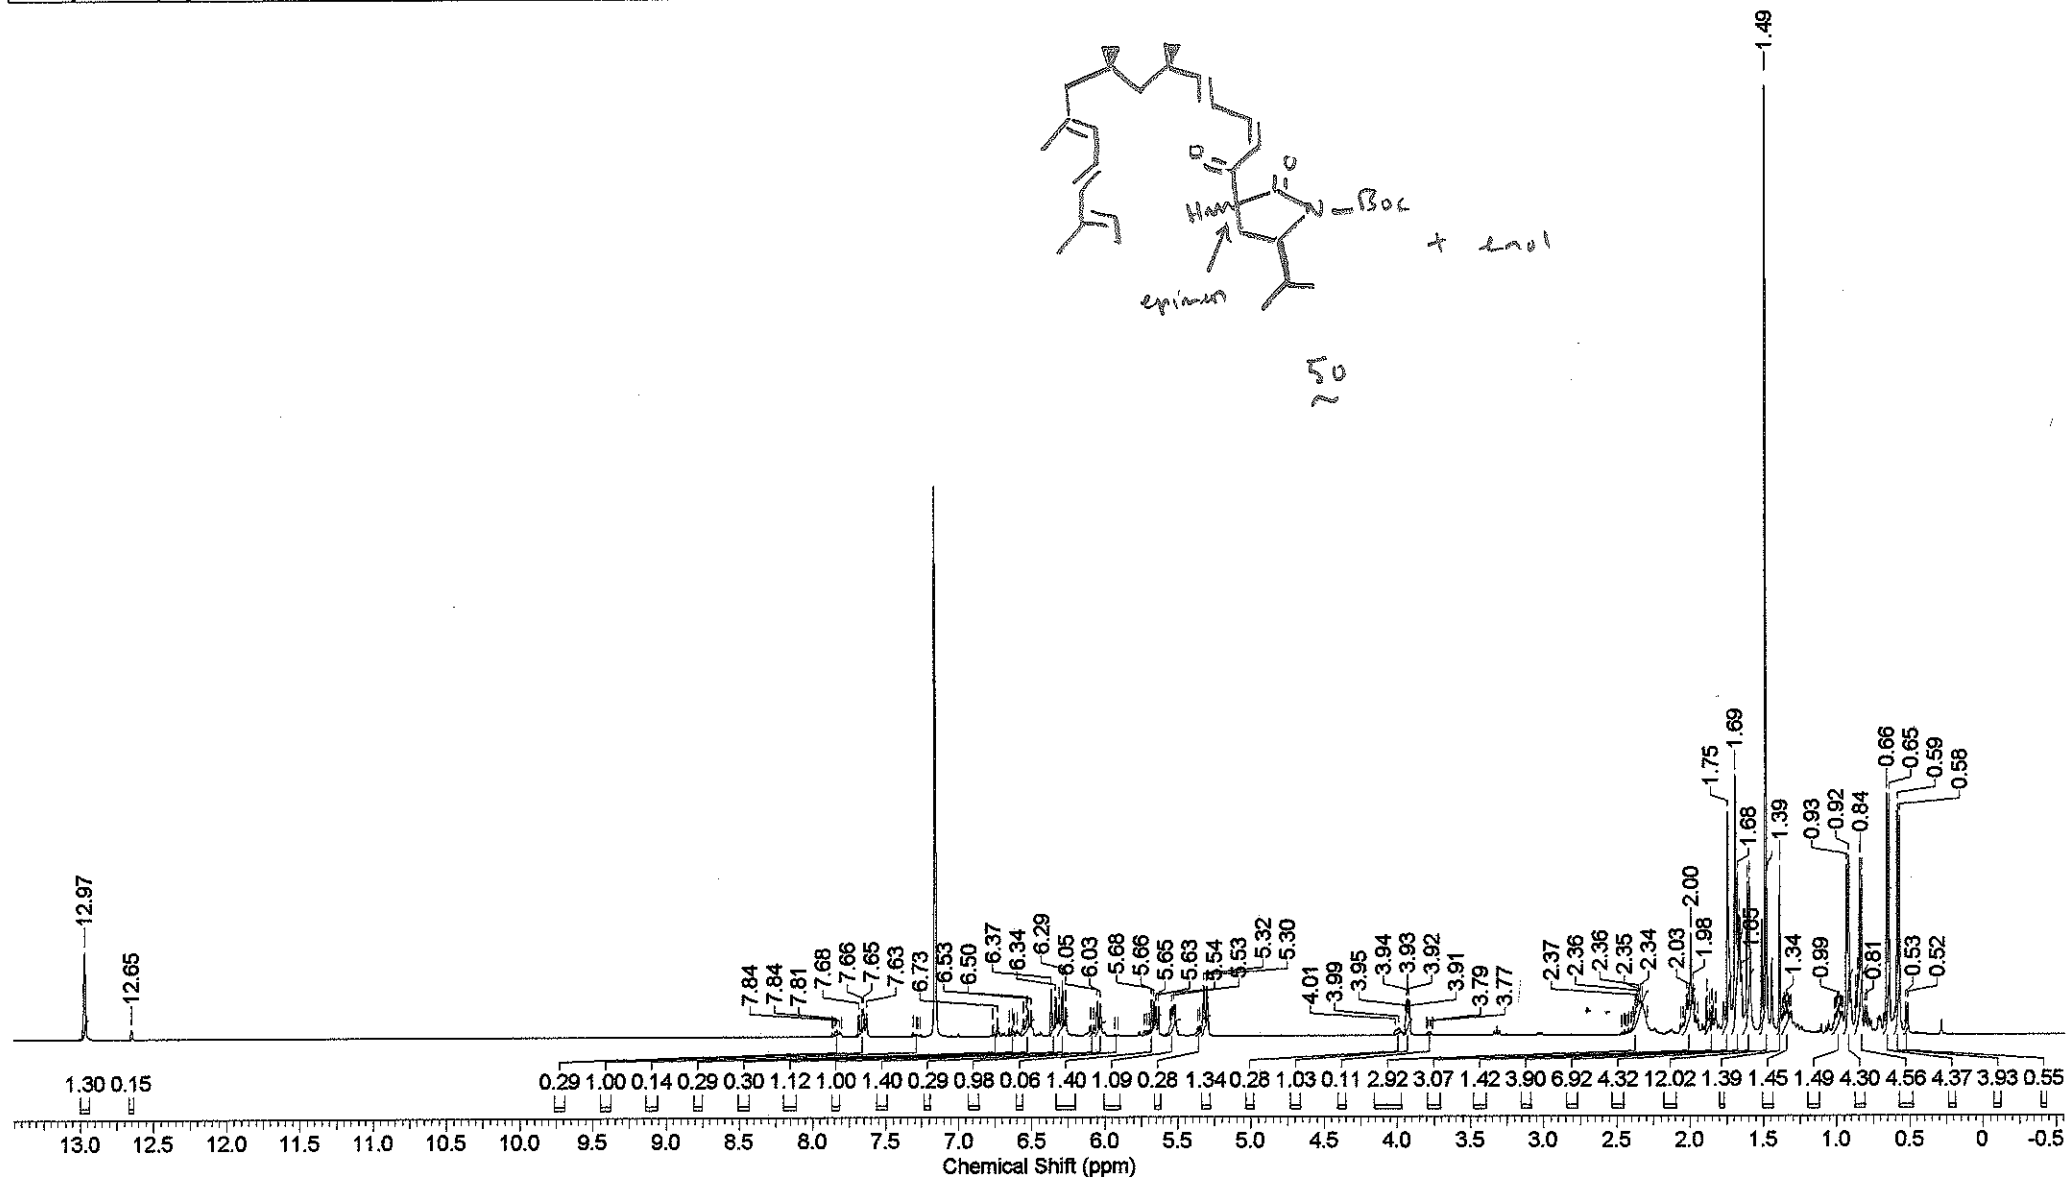



|                        |                      |                        |                                                                     |                      |                      |
|------------------------|----------------------|------------------------|---------------------------------------------------------------------|----------------------|----------------------|
| Acquisition Time (sec) | 3.9649               | Comment                | MWG053pp mPROTON C6D6 (e:\bruk400\data\2012\Jan) ejt 53             | Date                 | 09 Jan 2012 16:57:36 |
| Date Stamp             | 09 Jan 2012 16:57:36 | File Name              | F:\Chemistry\Year 3 data\NMR data\Data\Compound 38\MWG053pp_000001r |                      |                      |
| Frequency (MHz)        | 400.13               | Nucleus                | 1H                                                                  | Number of Transients | 16                   |
| Original Points Count  | 32768                | Owner                  | Administrator                                                       | Points Count         | 32768                |
| Receiver Gain          | 144.00               | SW(cyclical) (Hz)      | 8264.46                                                             | Pulse Sequence       | zg30b                |
| Sweep Width (Hz)       | 8264.21              | Temperature (degree C) | 22.700                                                              | Spectrum Offset (Hz) | 2446.3857            |

Compound38pp.esp

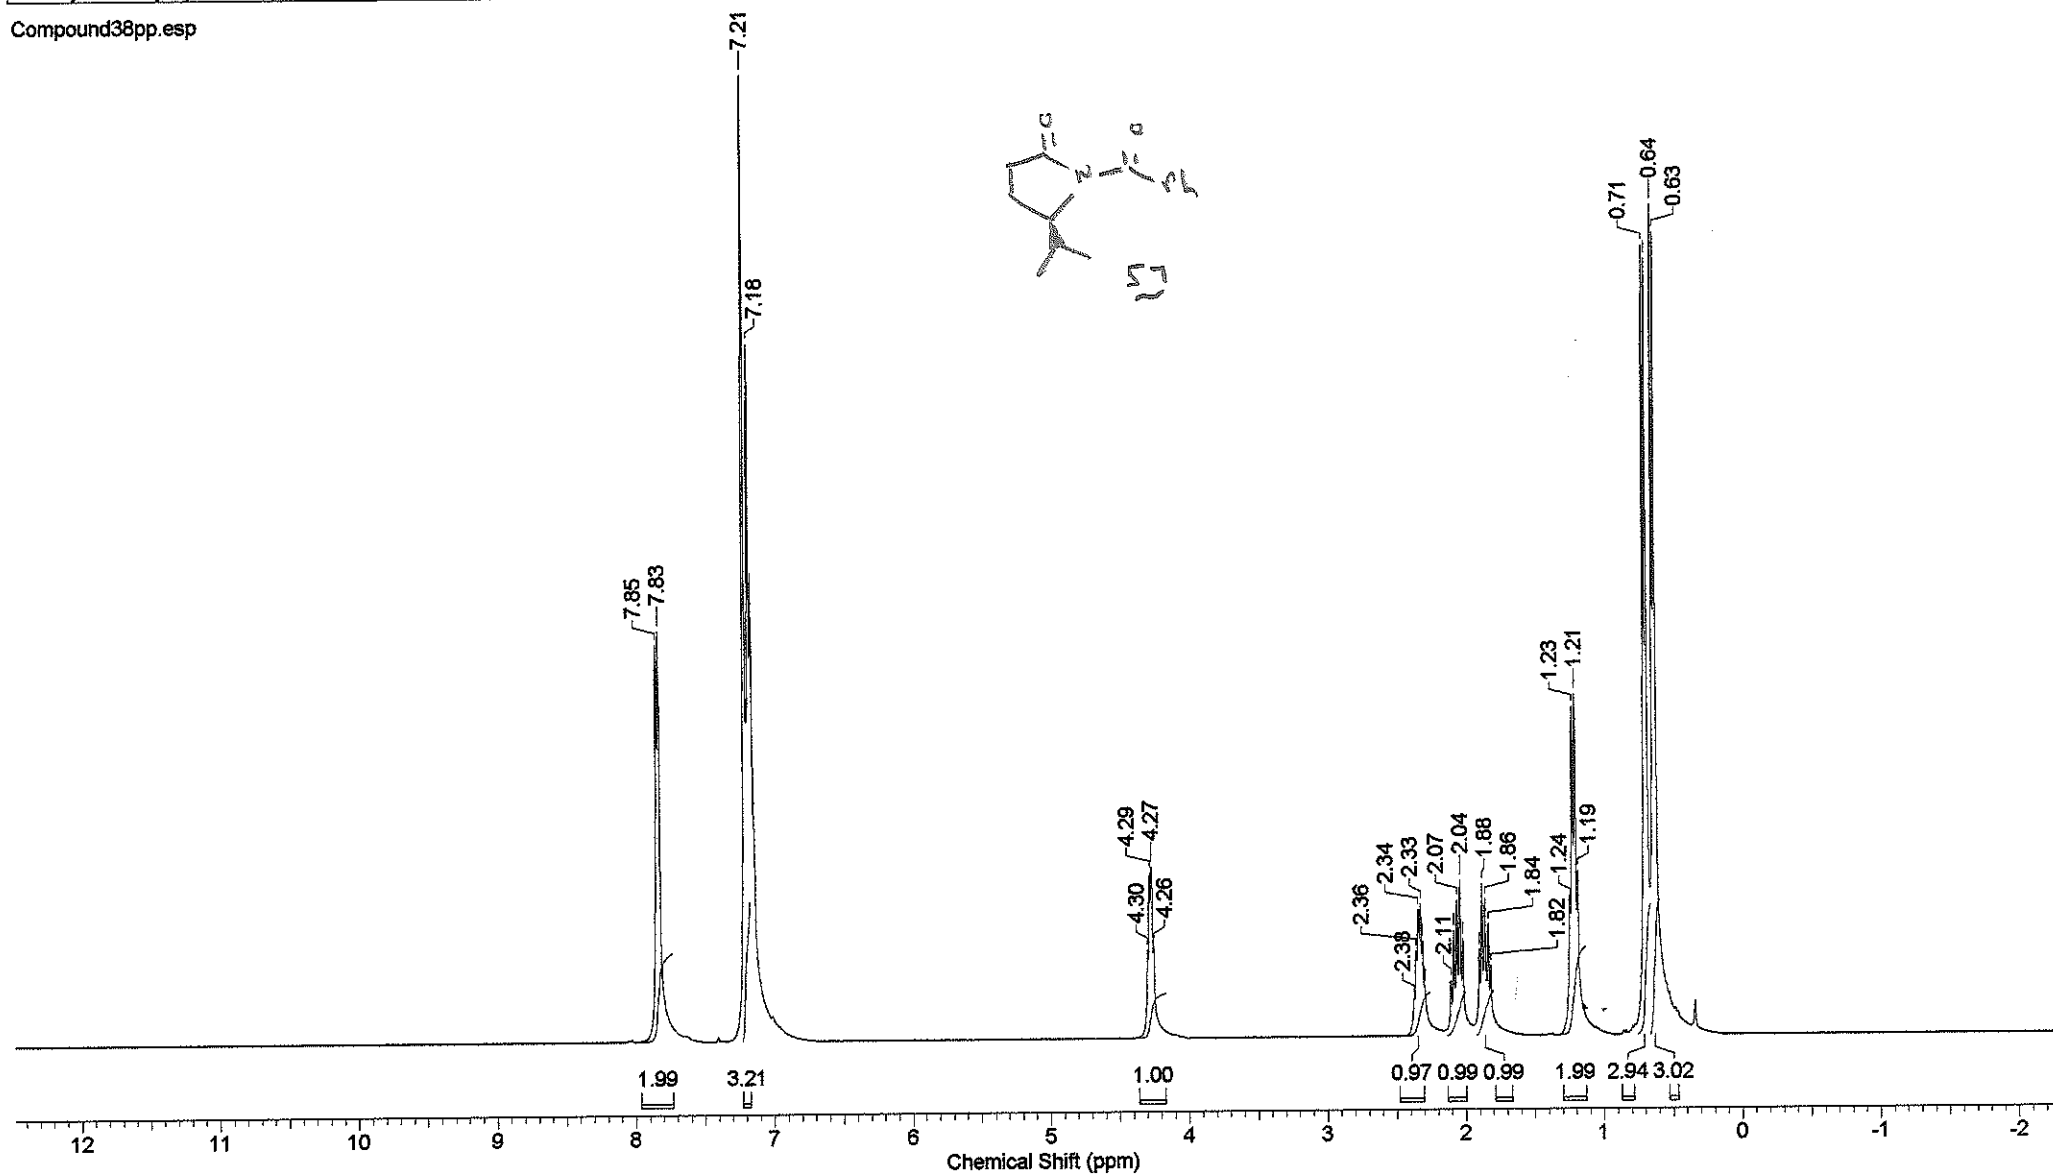

|                        |                      |                        |                                                                      |                      |                      |
|------------------------|----------------------|------------------------|----------------------------------------------------------------------|----------------------|----------------------|
| Acquisition Time (sec) | 1.1010               | Comment                | MWVG053pc mCARBON C6D6 /opt/bruk500data/2011/Nov ejt 15              | Date                 | 12 Nov 2011 12:18:08 |
| Date Stamp             | 12 Nov 2011 12:18:08 | File Name              | F:\Chemistry\Year 3 data\NMR data\Data\Compound 38\MWVG053pc_000001r |                      |                      |
| Frequency (MHz)        | 125.76               | Nucleus                | 13C                                                                  | Number of Transients | 256                  |
| Original Points Count  | 32768                | Owner                  | vnmr1                                                                | Points Count         | 32768                |
| Receiver Gain          | 512.00               | SW(cyclical) (Hz)      | 29761.90                                                             | Solvent              | BENZENE-d6           |
| Sweep Width (Hz)       | 29761.00             | Temperature (degree C) | 20.198                                                               | Spectrum Offset (Hz) | 12646.0762           |

Compound38pc.esp

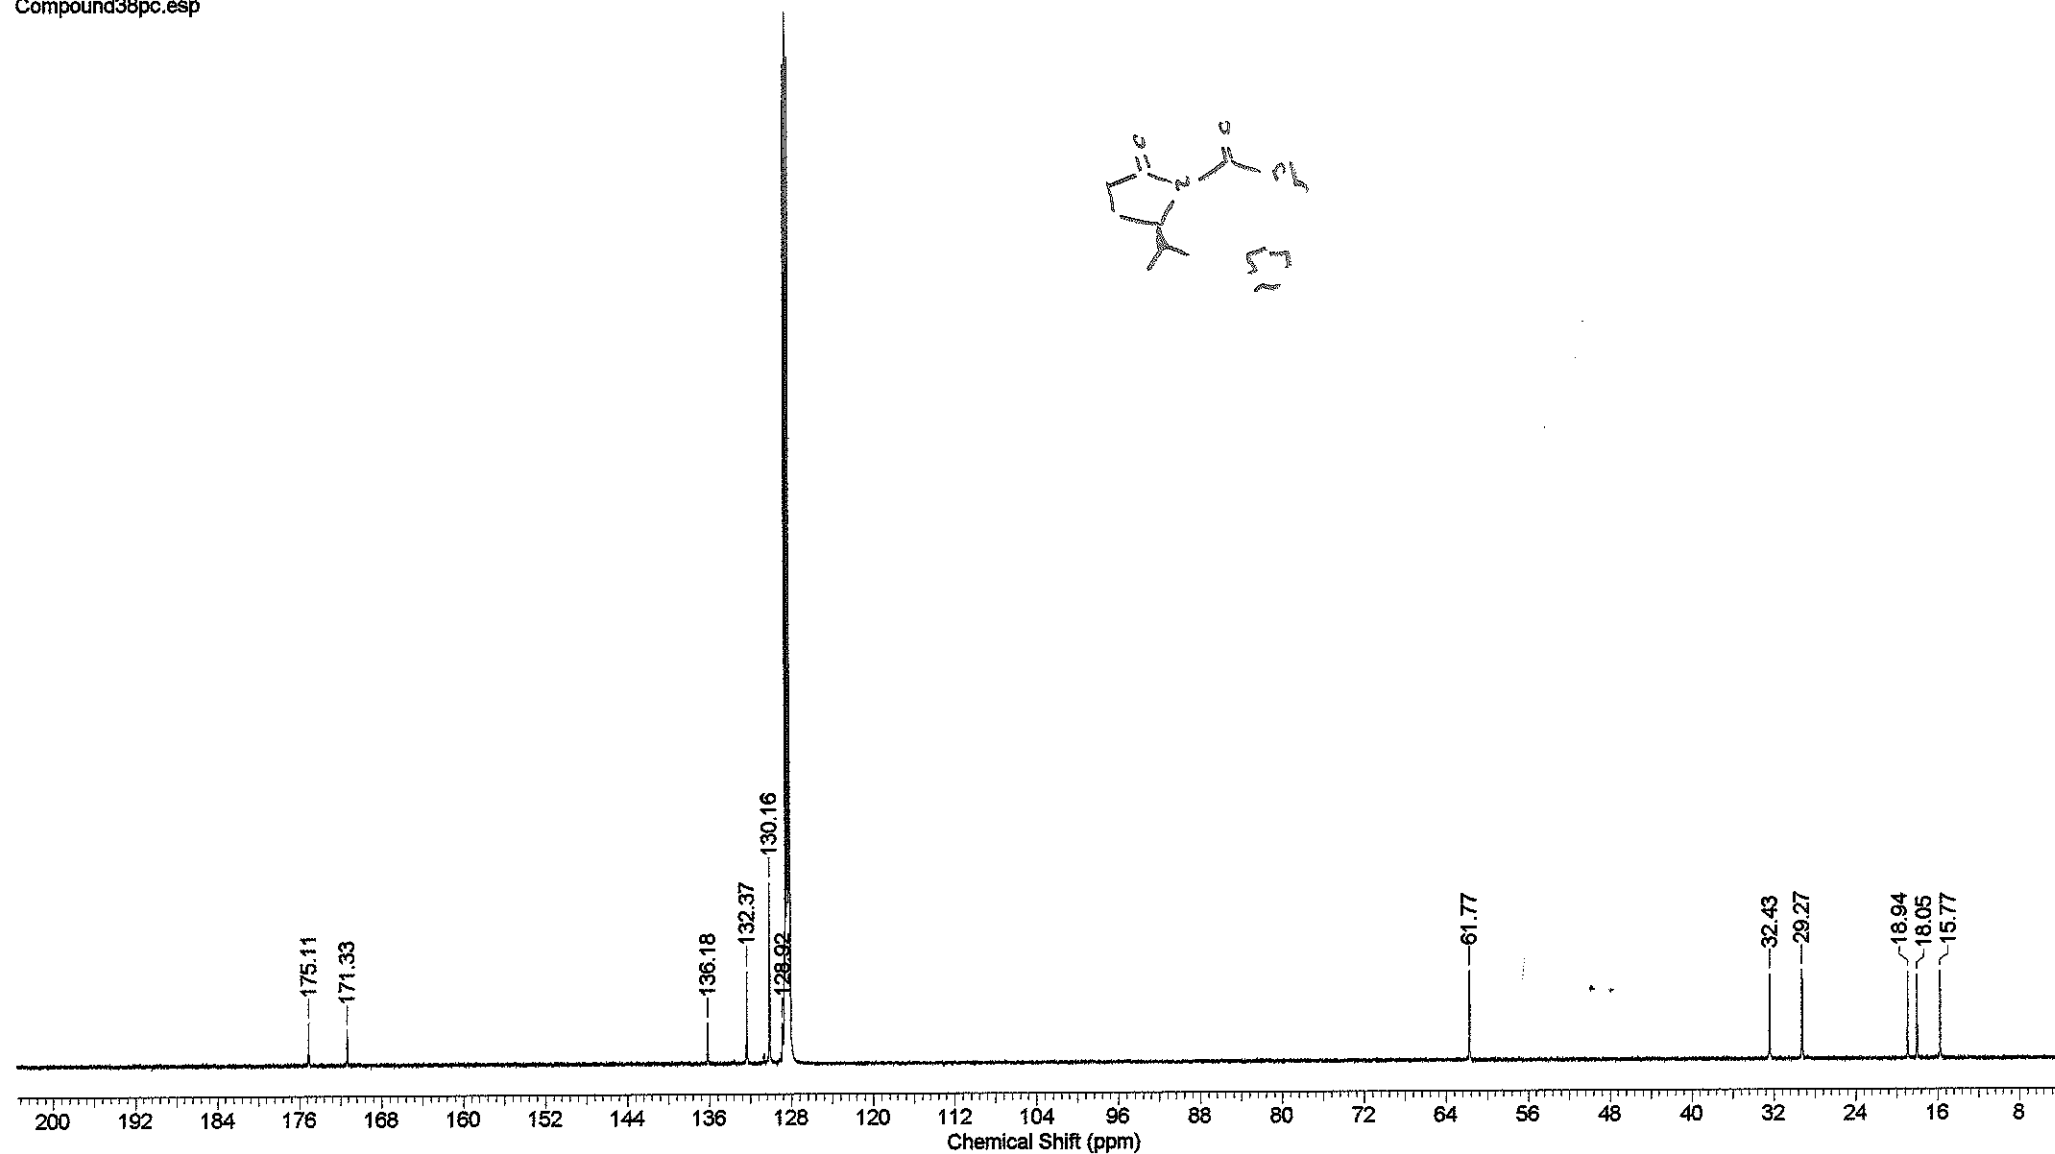

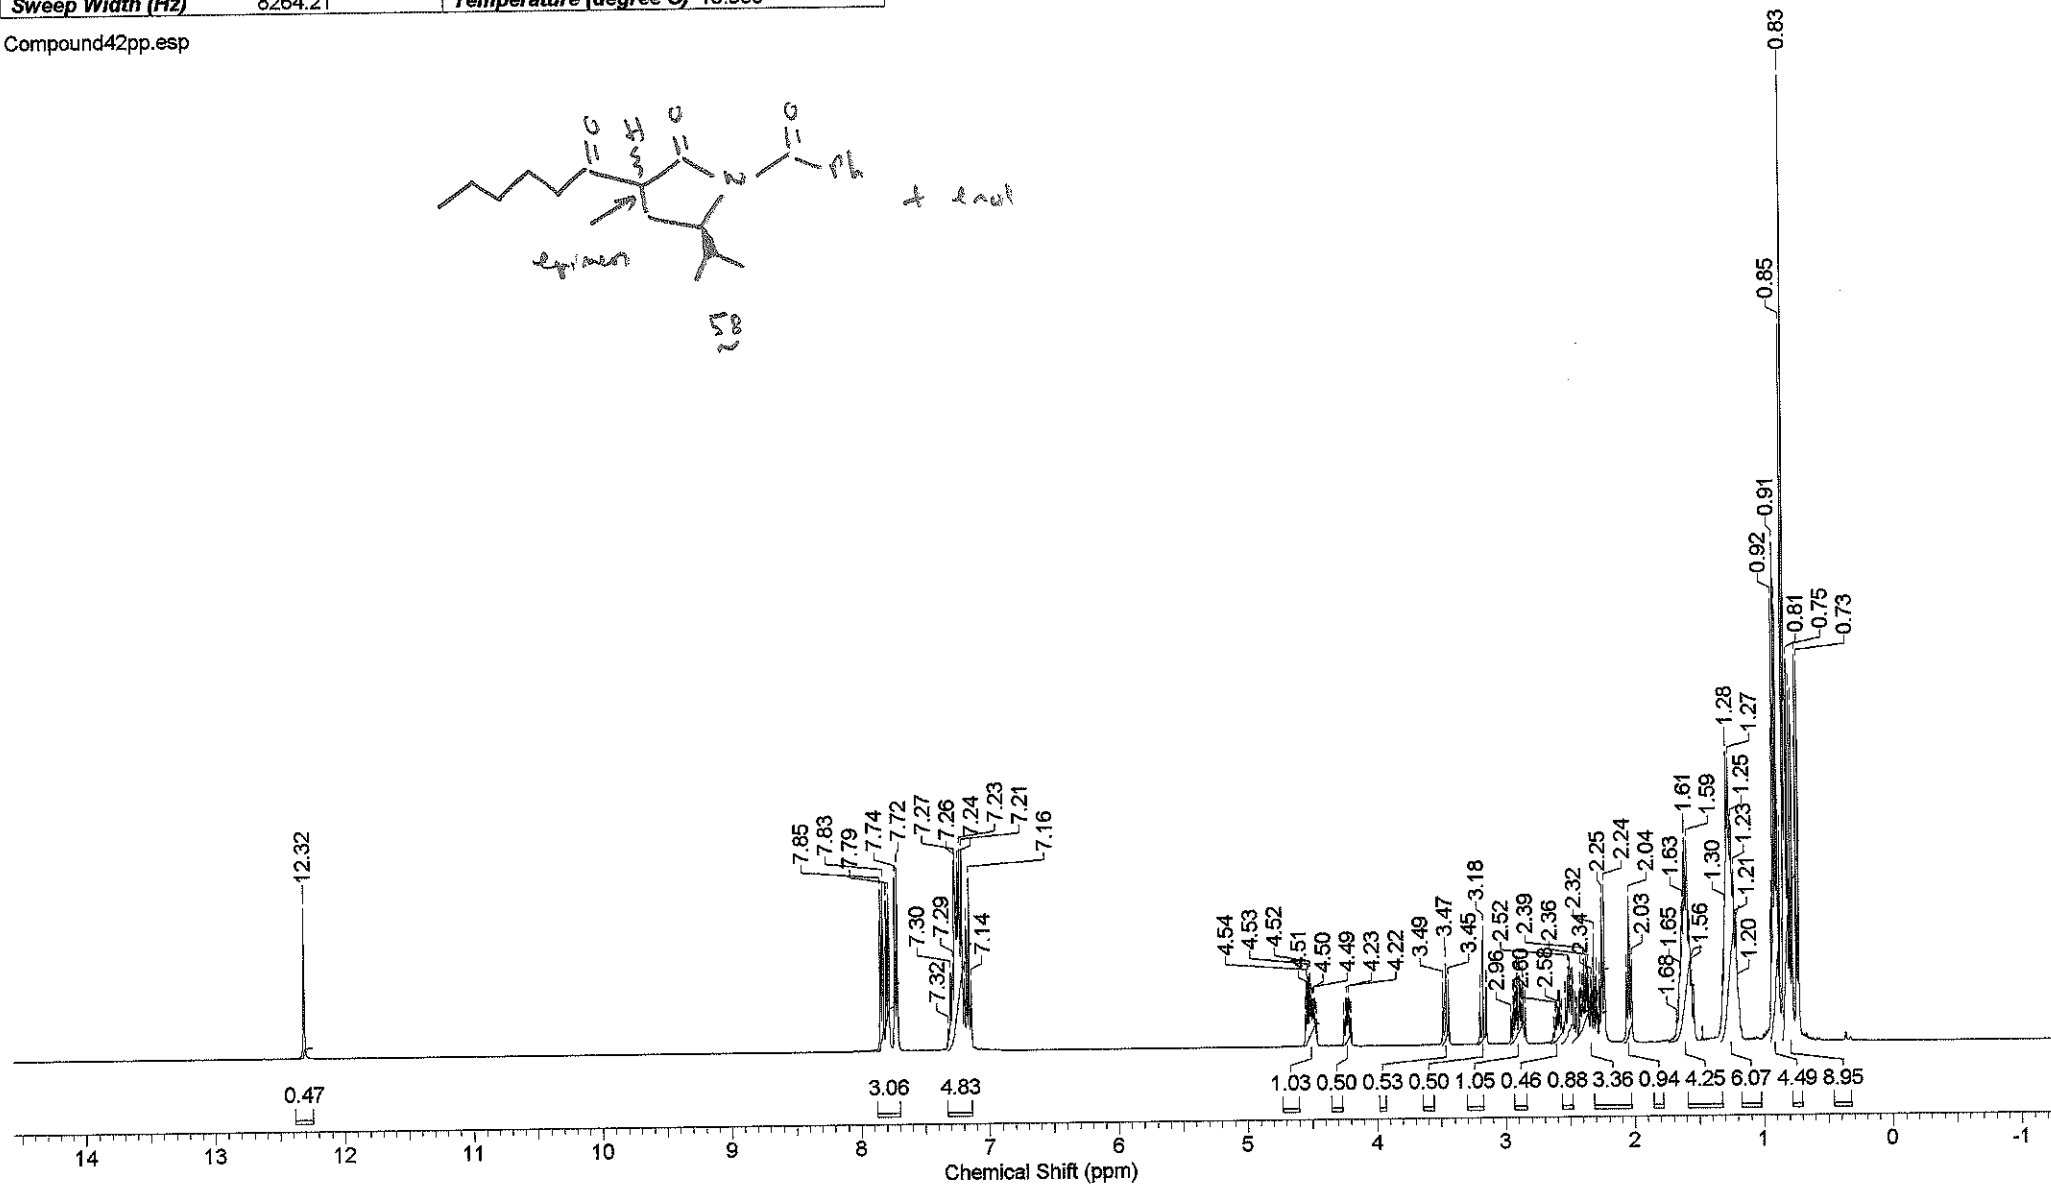

|                               |                      |                               |                                                        |                             |                                                                     |
|-------------------------------|----------------------|-------------------------------|--------------------------------------------------------|-----------------------------|---------------------------------------------------------------------|
| <b>Acquisition Time (sec)</b> | 1.0835               | <b>Comment</b>                | MVG084pc mCARBON C6D6 {e:\bruk400data\2011\Dec} ejt 30 | <b>Date</b>                 | 19 Dec 2011 12:26:40                                                |
| <b>Date Stamp</b>             | 19 Dec 2011 12:26:40 |                               |                                                        | <b>File Name</b>            | F:\Chemistry\Year 3 data\NMR data\Data\Compound 42\MVG084pc_000001r |
| <b>Frequency (MHz)</b>        | 100.61               | <b>Nucleus</b>                | 13C                                                    | <b>Number of Transients</b> | 256                                                                 |
| <b>Original Points Count</b>  | 32768                | <b>Owner</b>                  | Administrator                                          | <b>Points Count</b>         | 32768                                                               |
| <b>Receiver Gain</b>          | 512.00               | <b>SW(cyclical) (Hz)</b>      | 30241.94                                               | <b>Pulse Sequence</b>       | zgpg30                                                              |
| <b>Sweep Width (Hz)</b>       | 30241.01             | <b>Temperature (degree C)</b> | 20.600                                                 | <b>Solvent</b>              | BENZENE-d6                                                          |
|                               |                      |                               |                                                        | <b>Spectrum Offset (Hz)</b> | 11393.4844                                                          |

Compound42pc.esp

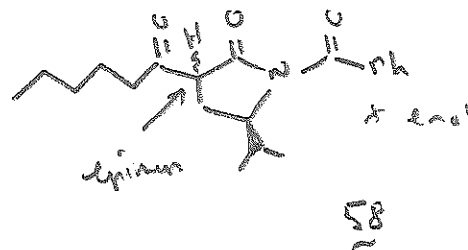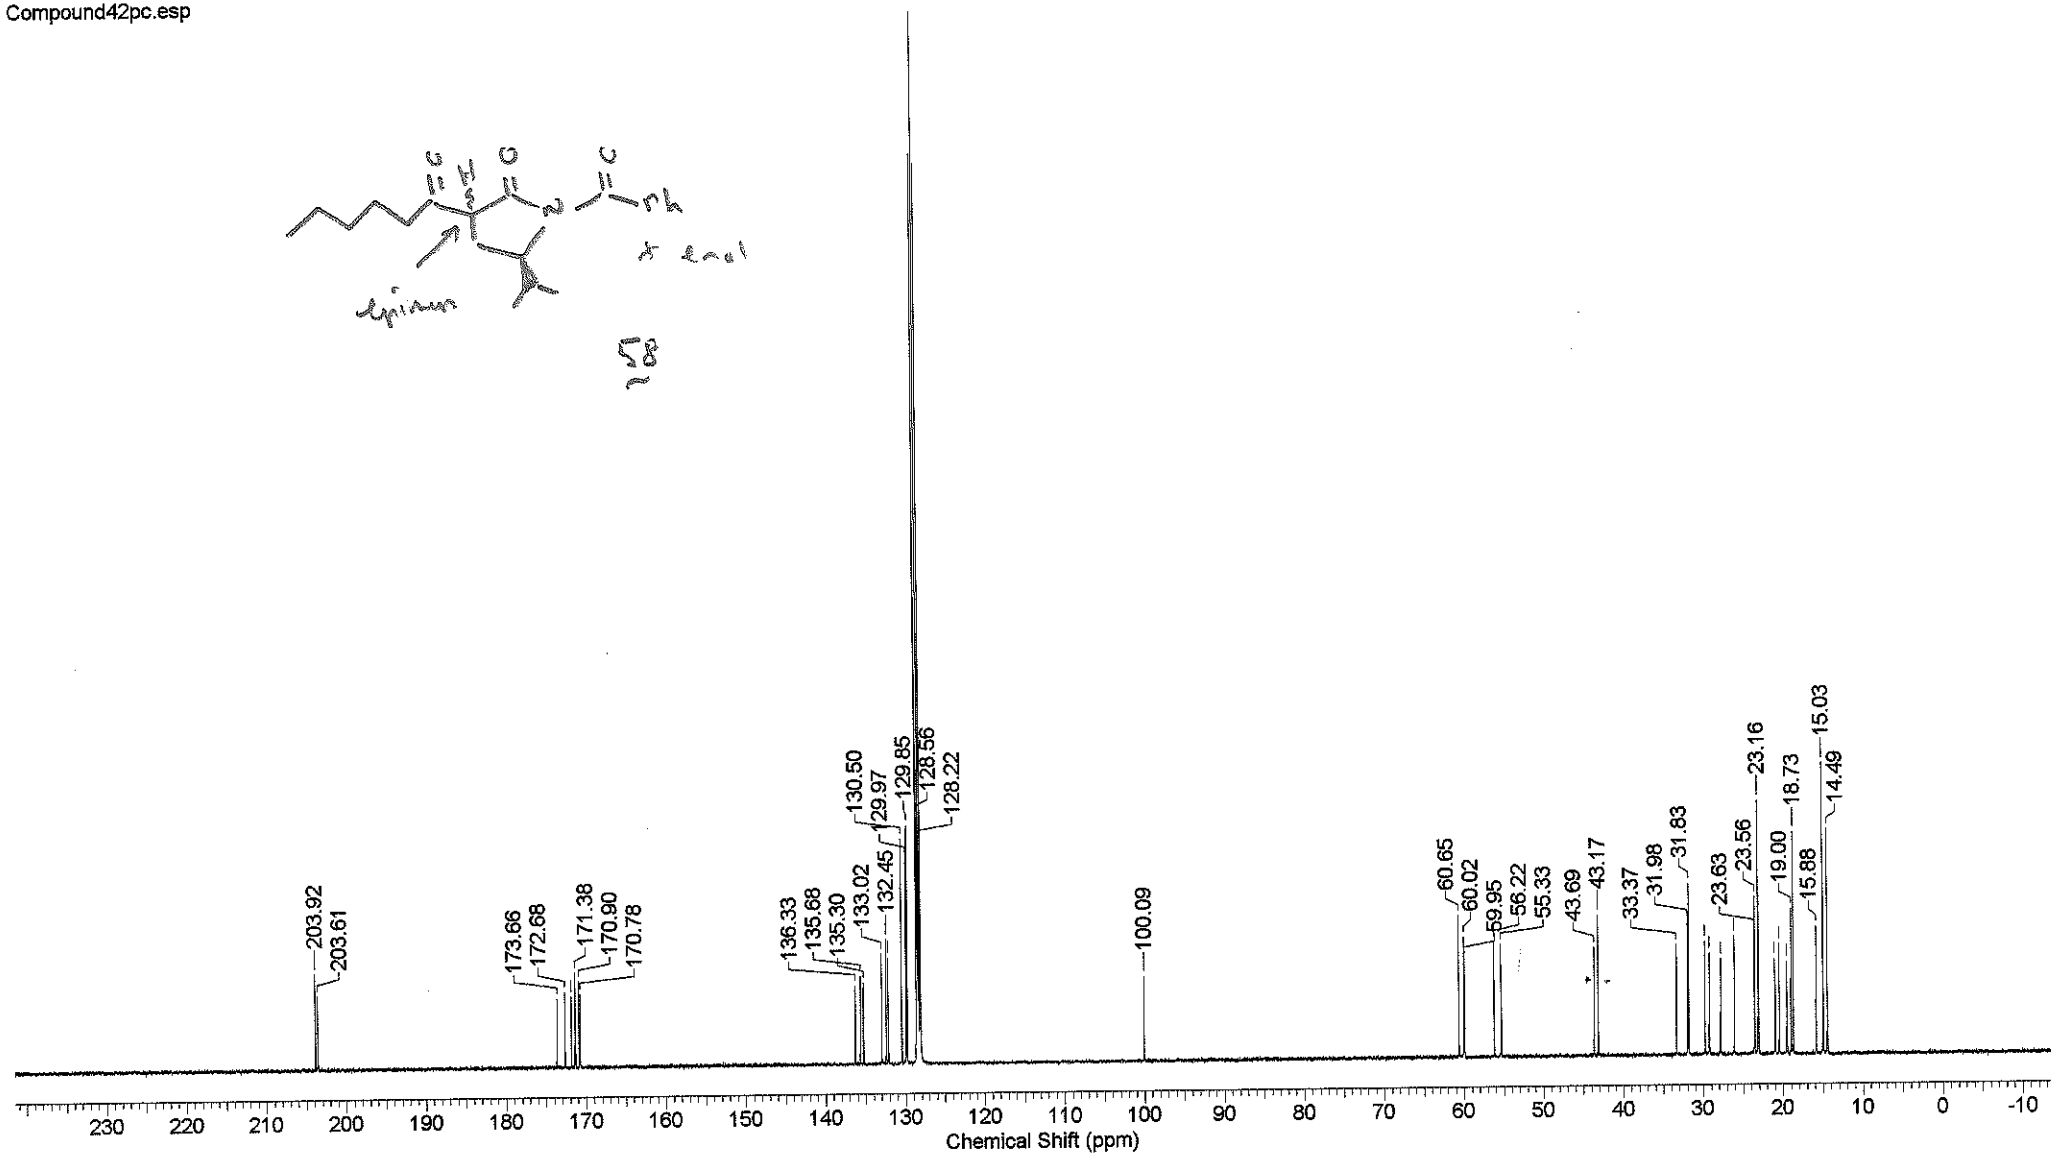

|                               |                      |                               |                                                                     |                             |                      |
|-------------------------------|----------------------|-------------------------------|---------------------------------------------------------------------|-----------------------------|----------------------|
| <b>Acquisition Time (sec)</b> | 3.9649               | <b>Comment</b>                | MWG093pp mPROTON C6D6 (e:\bruk400data\2012\Jan} ejt 56              | <b>Date</b>                 | 20 Jan 2012 10:54:56 |
| <b>Date Stamp</b>             | 20 Jan 2012 10:54:56 | <b>File Name</b>              | F:\Chemistry\Year 3 data\NMR data\Data\Compound 44\MWG093pp_000001r |                             |                      |
| <b>Frequency (MHz)</b>        | 400.13               | <b>Nucleus</b>                | 1H                                                                  | <b>Number of Transients</b> | 16                   |
| <b>Original Points Count</b>  | 32768                | <b>Owner</b>                  | Administrator                                                       | <b>Points Count</b>         | 32768                |
| <b>Receiver Gain</b>          | 101.00               | <b>SW(cyclical) (Hz)</b>      | 8264.46                                                             | <b>Pulse Sequence</b>       | zg30b                |
| <b>Sweep Width (Hz)</b>       | 8264.21              | <b>Temperature (degree C)</b> | 21.700                                                              | <b>Spectrum Offset (Hz)</b> | 2425.9570            |

Compound44pp.esp

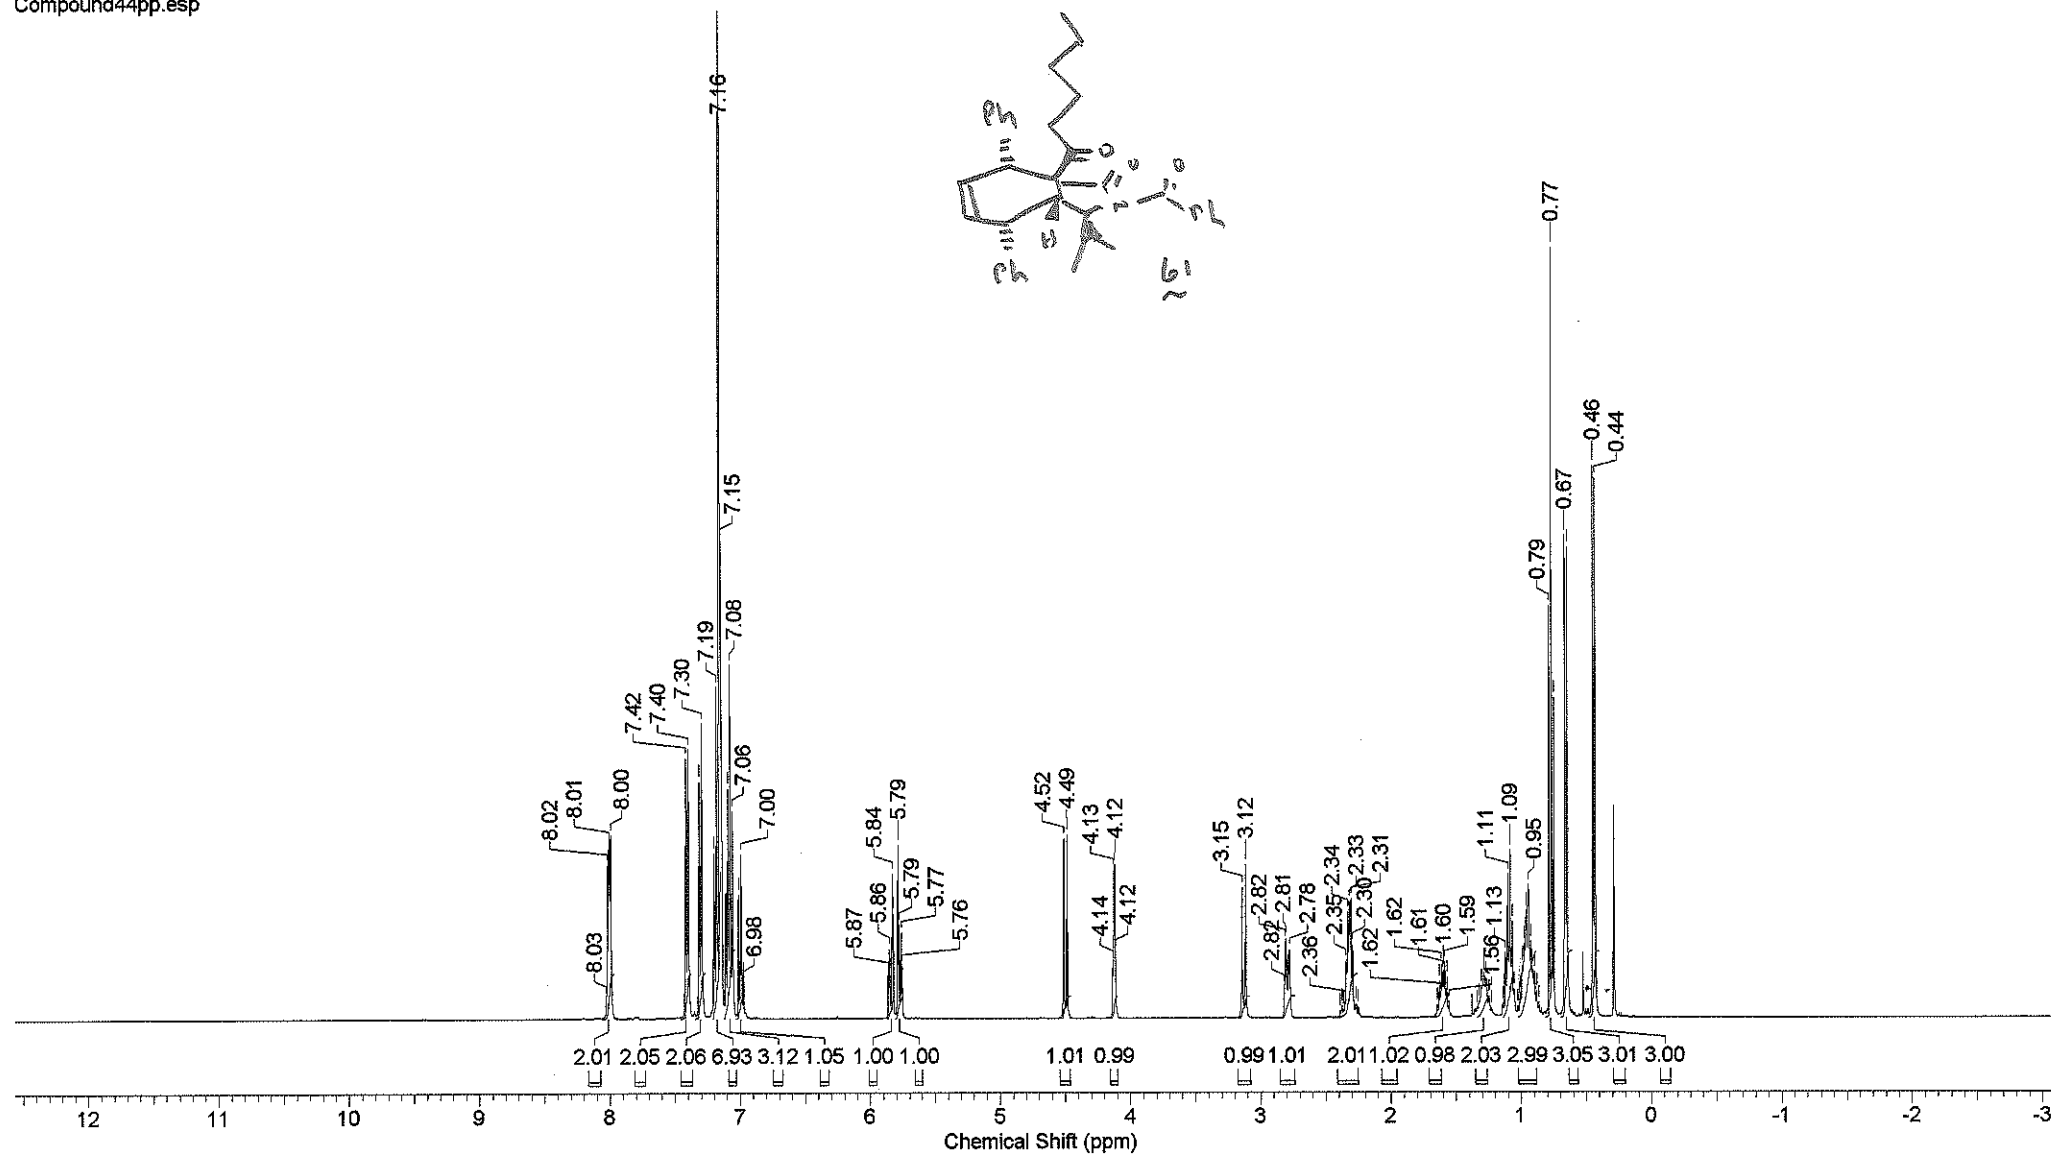

|                               |                      |                               |                                                                      |                             |                      |
|-------------------------------|----------------------|-------------------------------|----------------------------------------------------------------------|-----------------------------|----------------------|
| <b>Acquisition Time (sec)</b> | 1.0835               | <b>Comment</b>                | MWVG093pc mCARBON C6D6 {e:\bruk400data\2012\Jan} ejt 56              | <b>Date</b>                 | 20 Jan 2012 11:18:24 |
| <b>Date Stamp</b>             | 20 Jan 2012 11:18:24 | <b>File Name</b>              | F:\Chemistry\Year 3 data\NMR data\Data\Compound 44\MWVG093pc_000001r |                             |                      |
| <b>Frequency (MHz)</b>        | 100.61               | <b>Nucleus</b>                | <sup>13</sup> C                                                      | <b>Number of Transients</b> | 256                  |
| <b>Original Points Count</b>  | 32768                | <b>Owner</b>                  | Administrator                                                        | <b>Points Count</b>         | 32768                |
| <b>Receiver Gain</b>          | 512.00               | <b>SW(cyclical) (Hz)</b>      | 30241.94                                                             | <b>Pulse Sequence</b>       | zgpg30               |
| <b>Sweep Width (Hz)</b>       | 30241.01             | <b>Temperature (degree C)</b> | 22.400                                                               | <b>Solvent</b>              | BENZENE-d6           |
|                               |                      |                               |                                                                      | <b>Spectrum Offset (Hz)</b> | 11393.5010           |

Compound44pc.esp

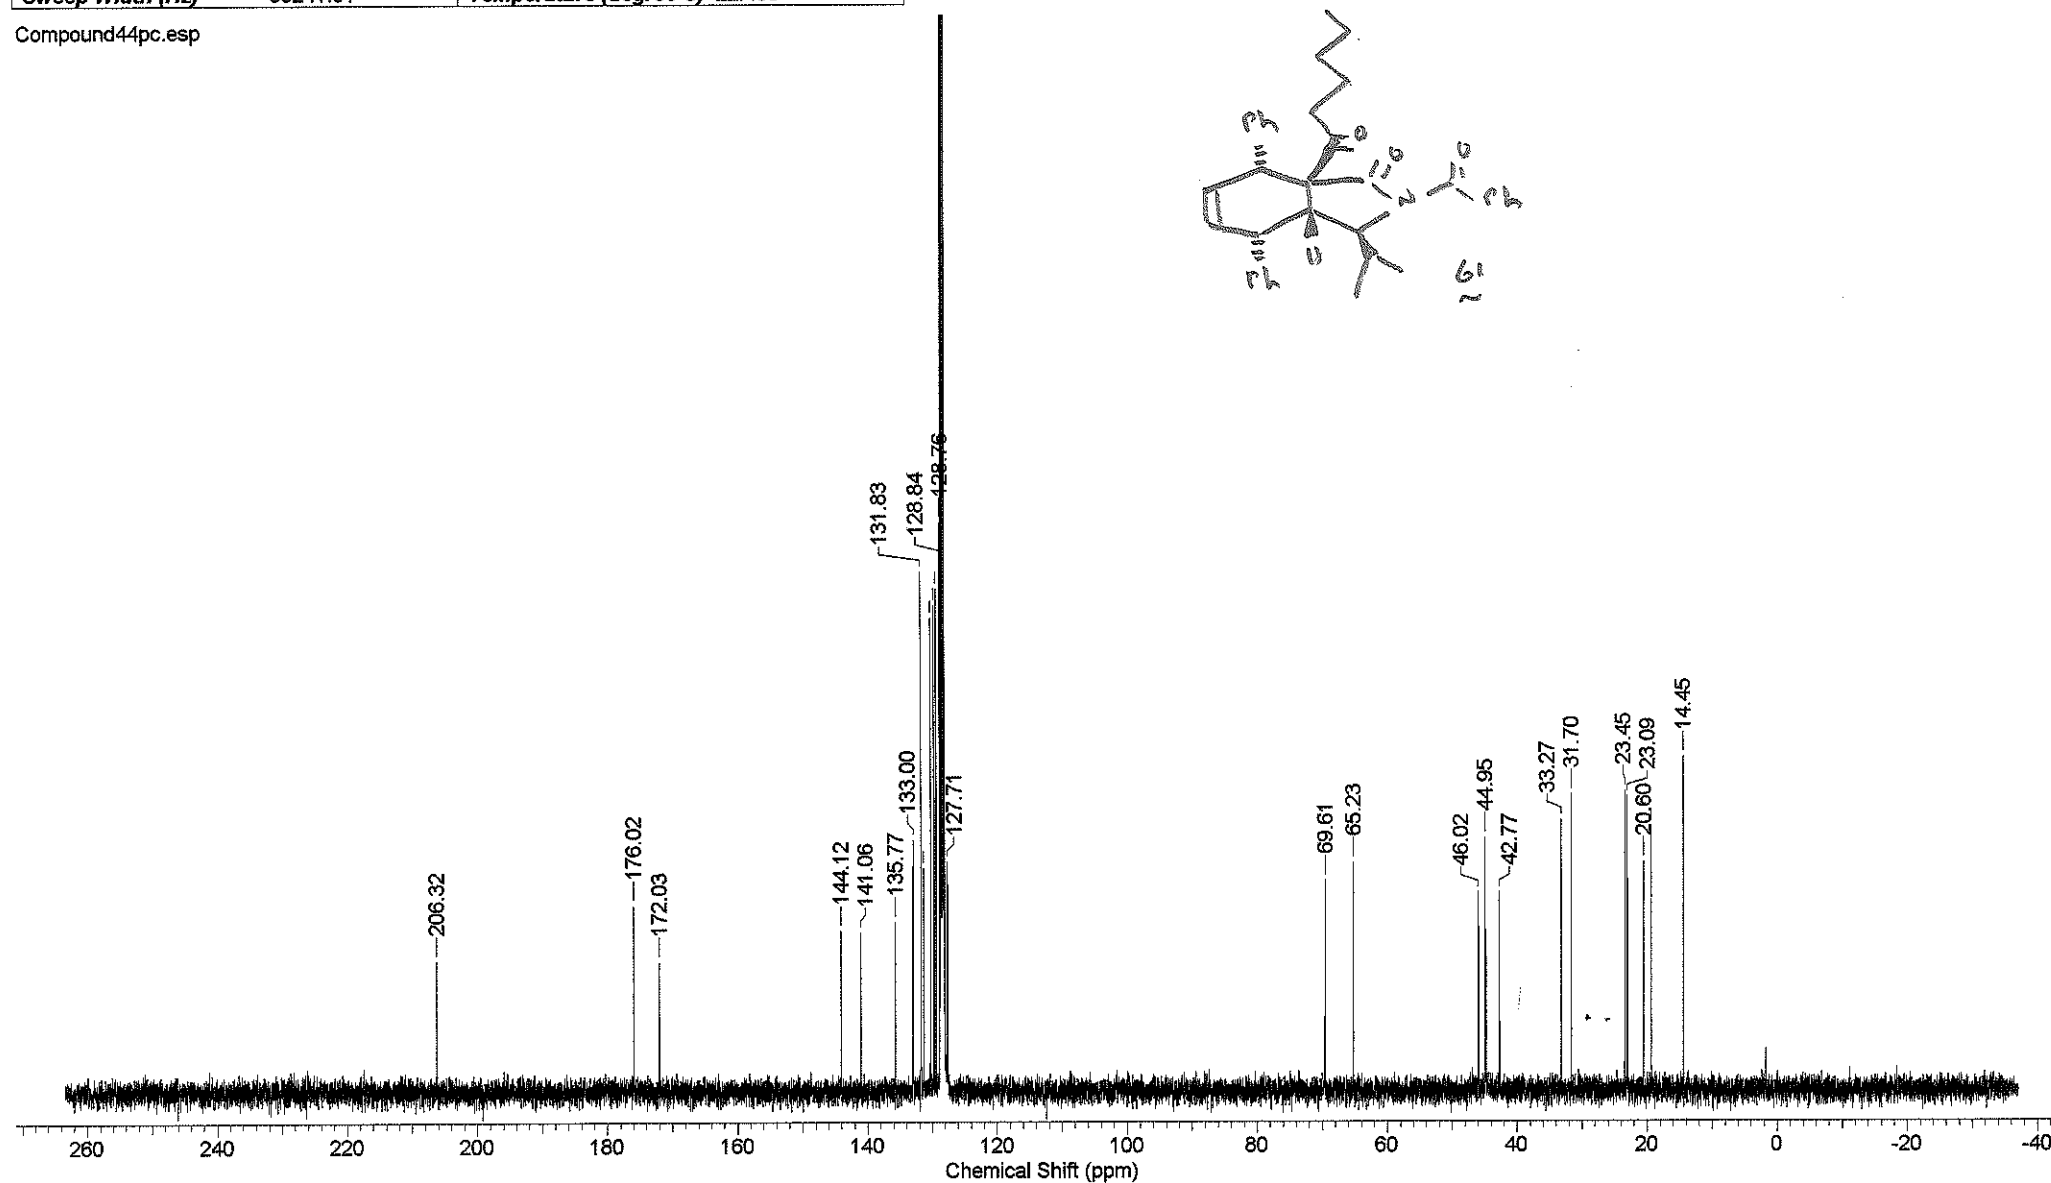

|                        |                      |                        |                                                                     |                      |                      |
|------------------------|----------------------|------------------------|---------------------------------------------------------------------|----------------------|----------------------|
| Acquisition Time (sec) | 3.9649               | Comment                | MWG098pp mPROTON C6D6 {e:\bruk400data\2012\Jan} ejt 53              | Date                 | 23 Jan 2012 18:03:44 |
| Date Stamp             | 23 Jan 2012 18:03:44 | File Name              | F:\Chemistry\Year 3 data\NMR data\Data\Compound 45\MWH018pp_000001r |                      |                      |
| Frequency (MHz)        | 400.13               | Nucleus                | 1H                                                                  | Number of Transients | 16                   |
| Original Points Count  | 32768                | Owner                  | Administrator                                                       | Points Count         | 32768                |
| Receiver Gain          | 256.00               | SW(cyclical) (Hz)      | 8264.46                                                             | Solvent              | BENZENE-d6           |
| Sweep Width (Hz)       | 8264.21              | Temperature (degree C) | 21.400                                                              | Pulse Sequence       | zg30b                |
|                        |                      |                        |                                                                     | Spectrum Offset (Hz) | 2426.2097            |

Compound45pp.esp

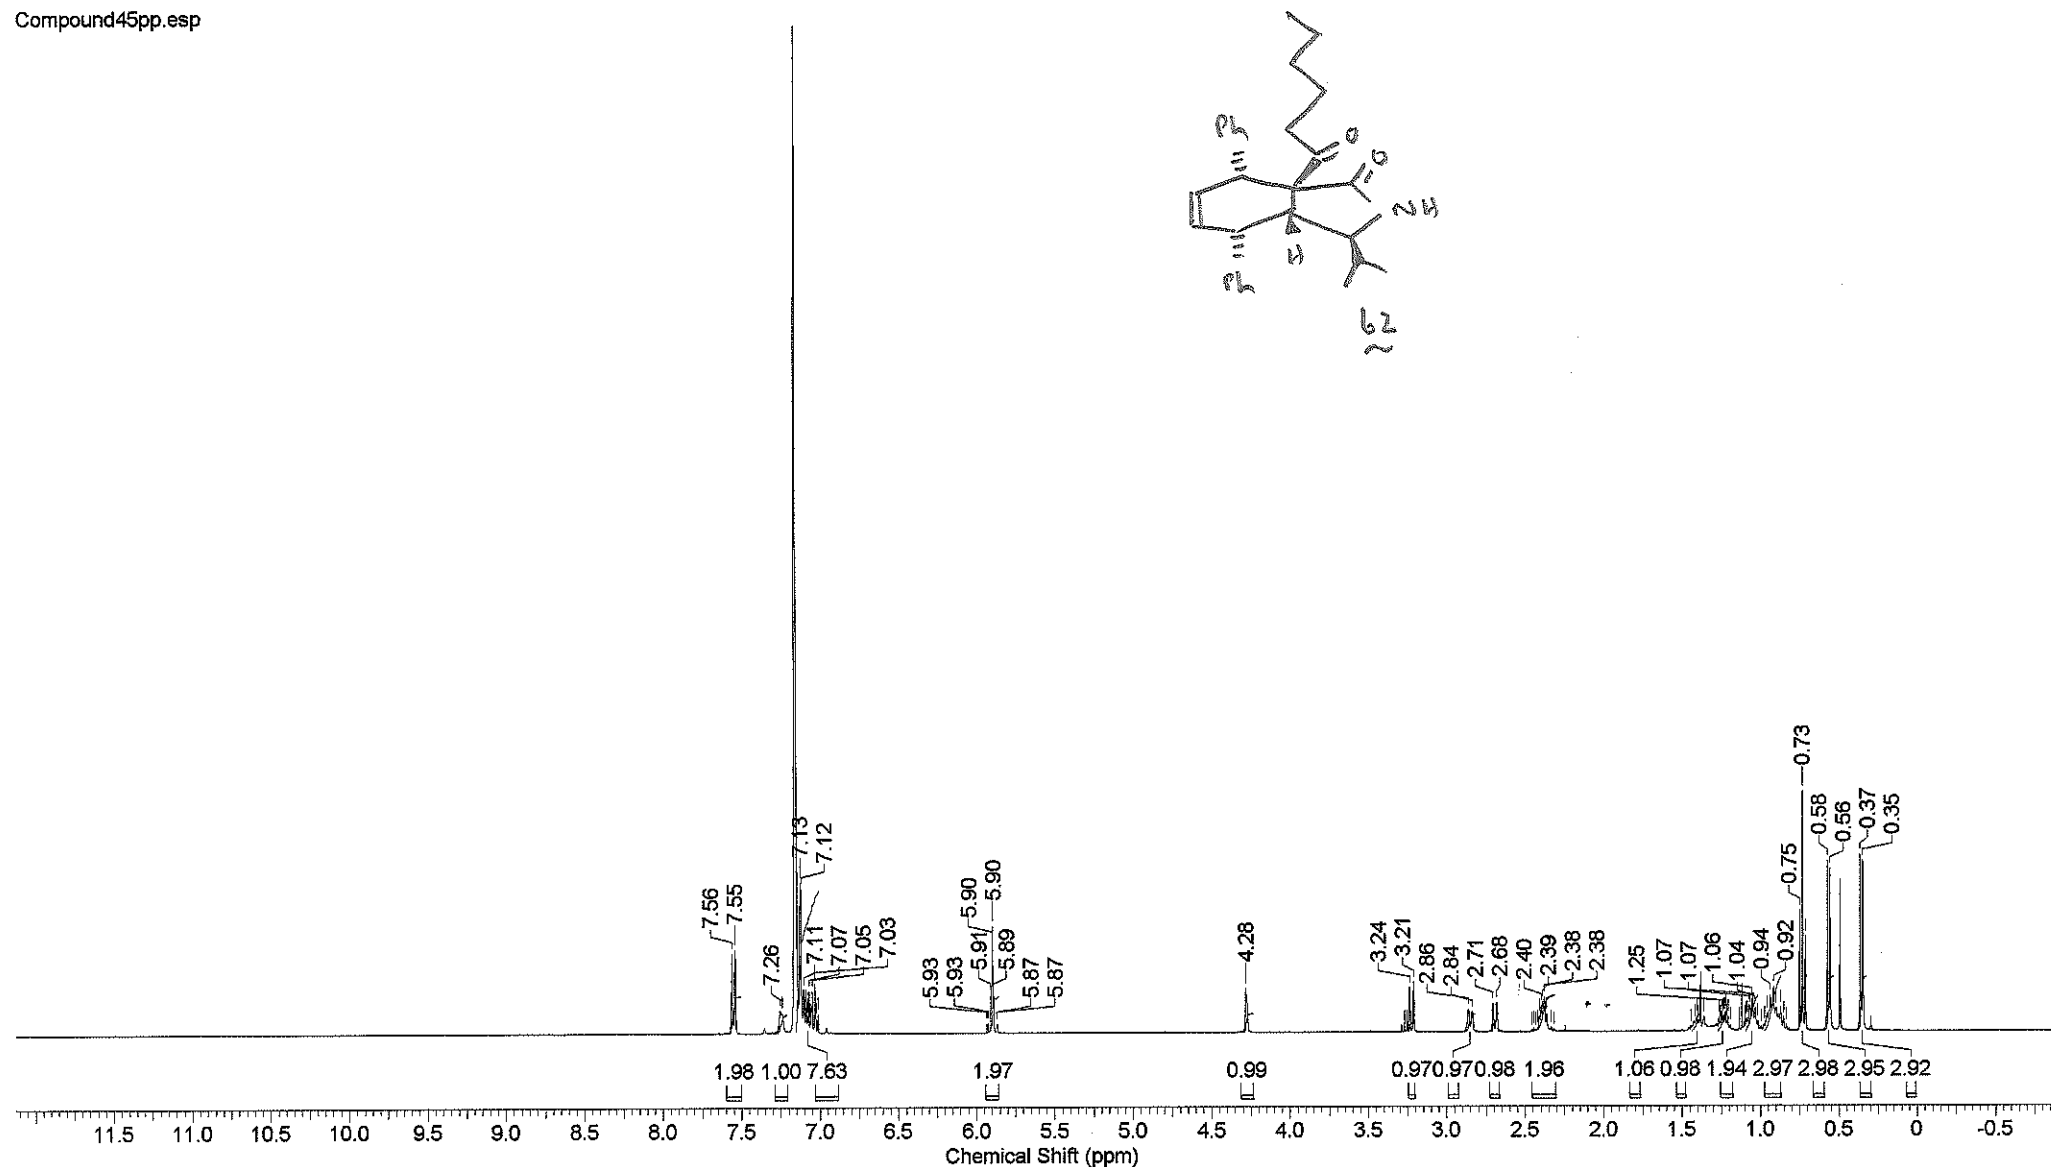

Compound45pc.esp

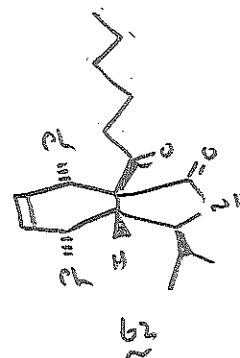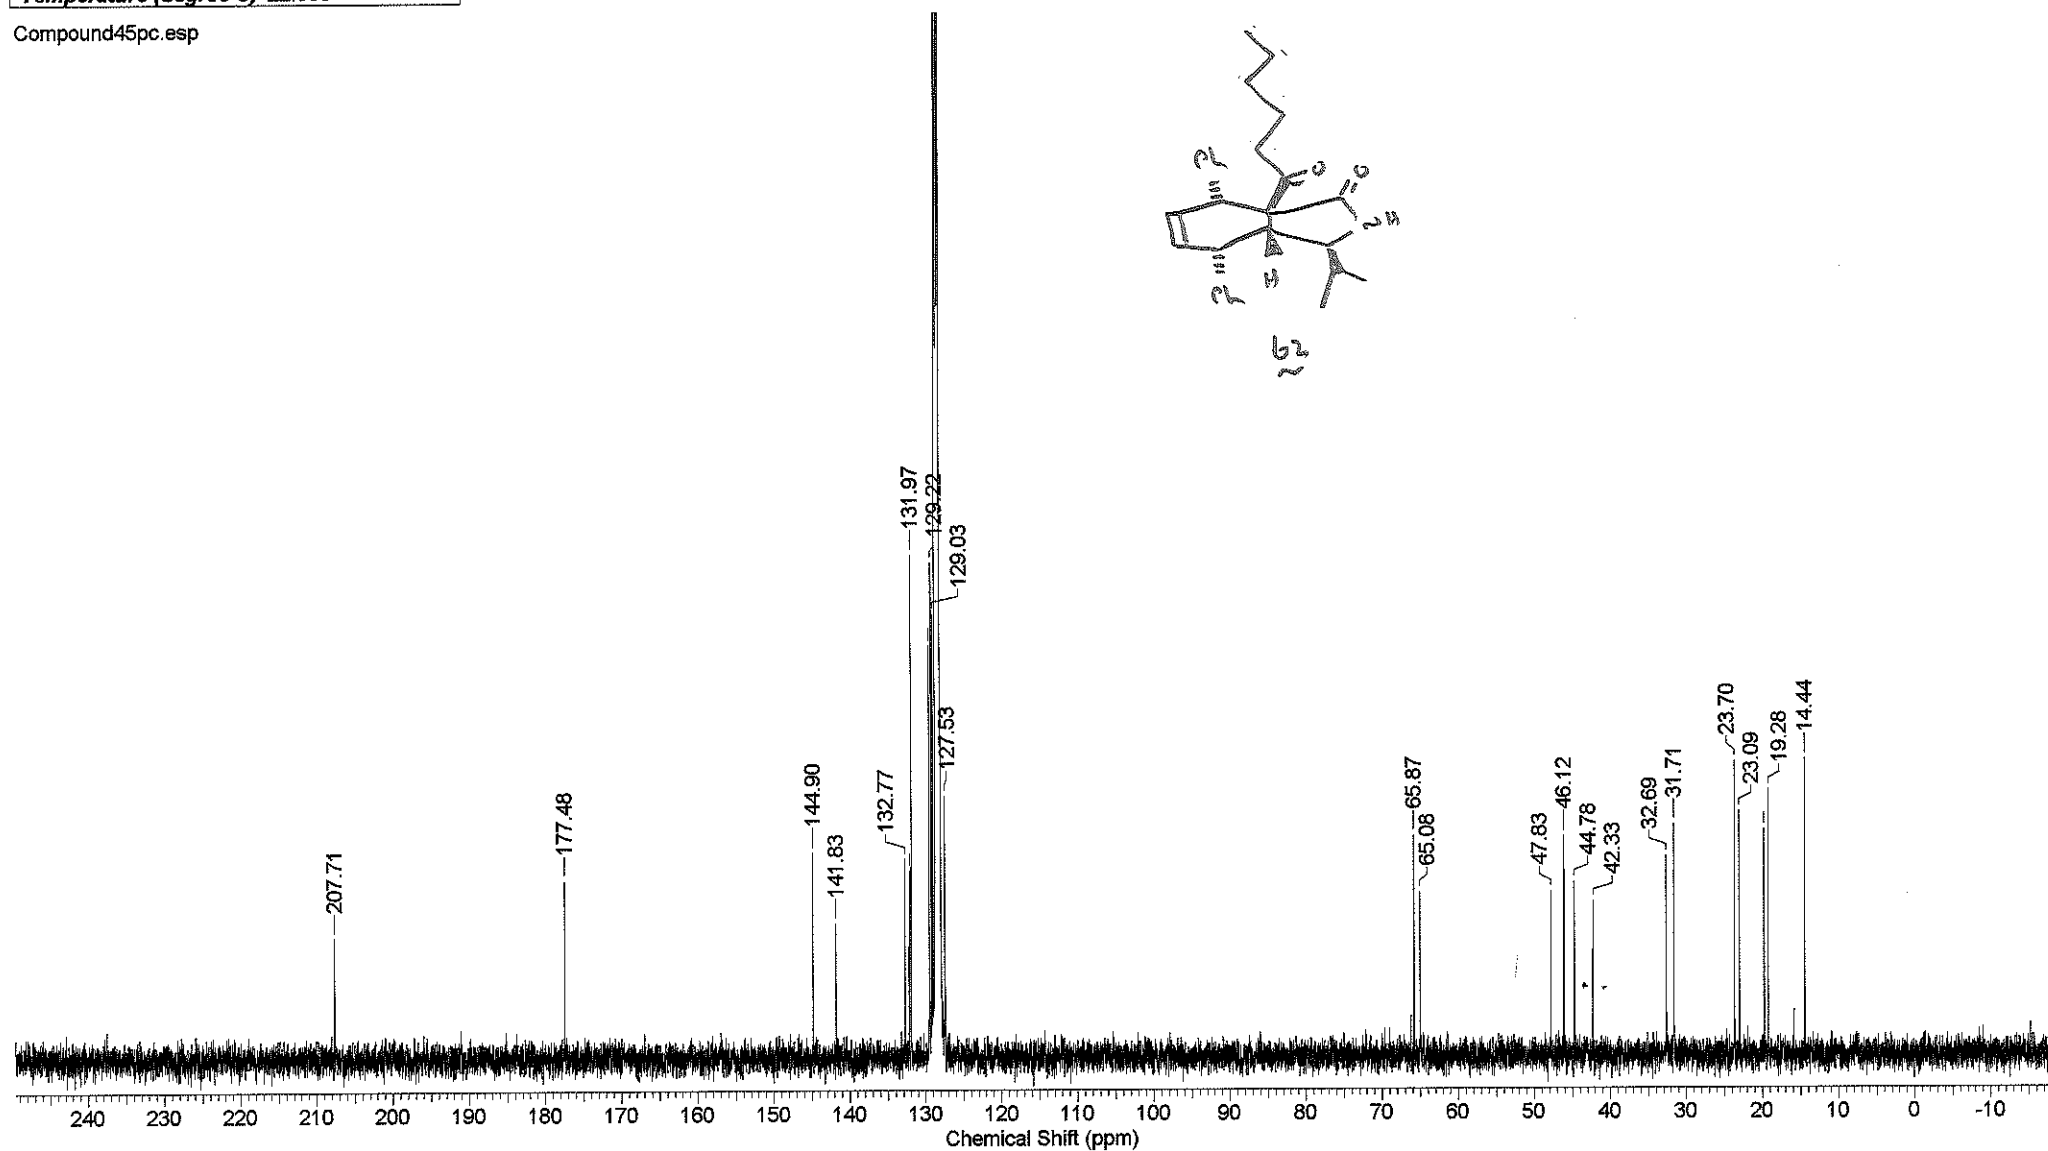



|                        |                      |                        |                                                                     |                      |                      |
|------------------------|----------------------|------------------------|---------------------------------------------------------------------|----------------------|----------------------|
| Acquisition Time (sec) | 3.9649               | Comment                | MWG005pp mPROTON C6D6 (e:\bruk400data\2011\Oct) ejt 37              | Date                 | 30 Oct 2011 13:20:00 |
| Date Stamp             | 30 Oct 2011 13:20:00 | File Name              | F:\Chemistry\Year 3 data\NMR data\Data\Compound 30\MWG005pp_000001r | Origin               | AV400                |
| Frequency (MHz)        | 400.13               | Nucleus                | 1H                                                                  | Number of Transients | 16                   |
| Original Points Count  | 32768                | Owner                  | Administrator                                                       | Points Count         | 32768                |
| Receiver Gain          | 90.50                | SW(cyclical) (Hz)      | 8264.46                                                             | Pulse Sequence       | zg30b                |
| Sweep Width (Hz)       | 8264.21              | Temperature (degree C) | 19.900                                                              | Spectrum Offset (Hz) | 2426.2097            |

Compound30pp.esp

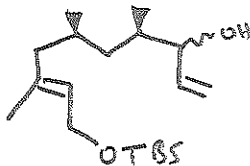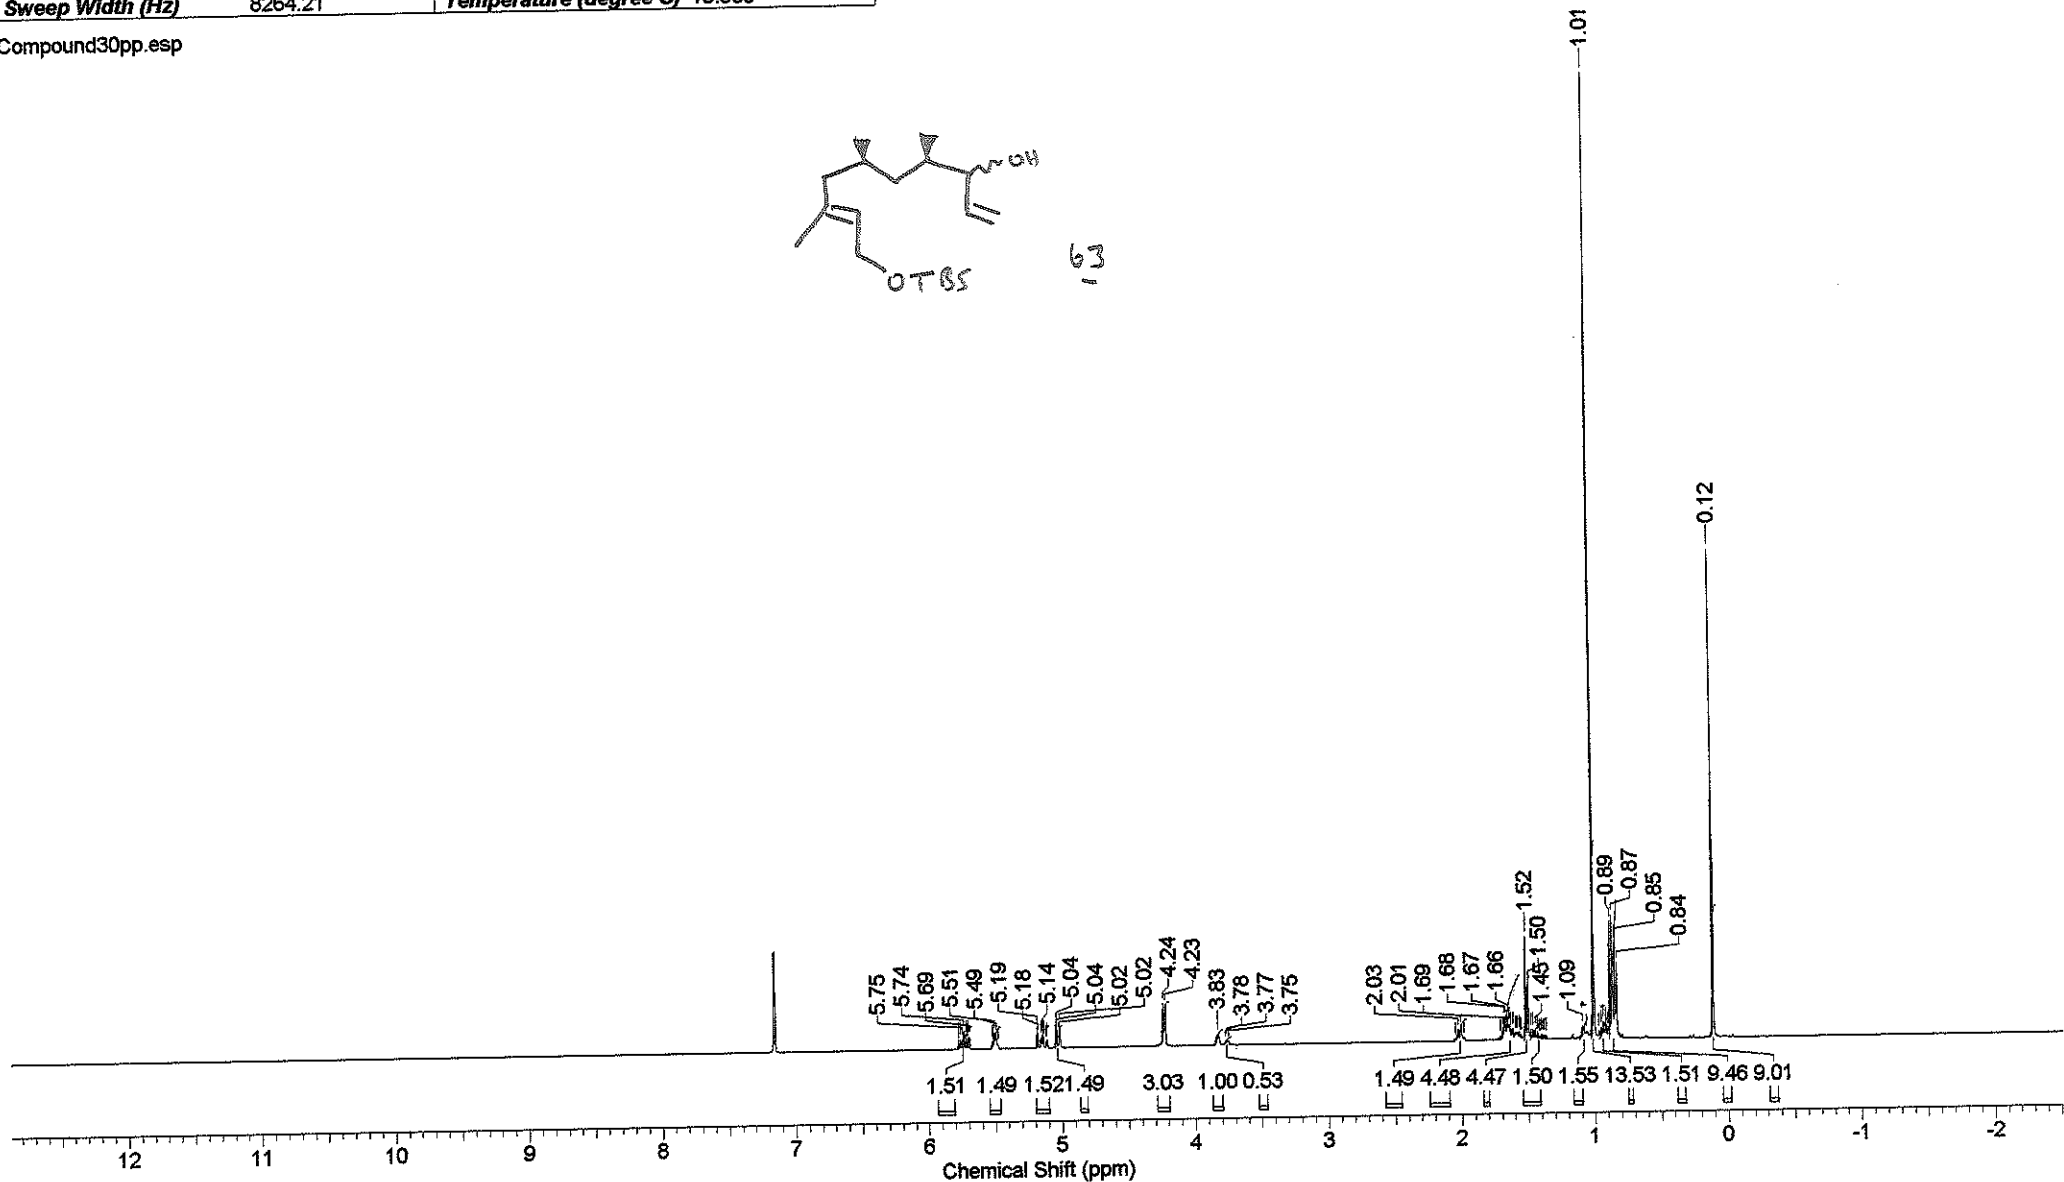

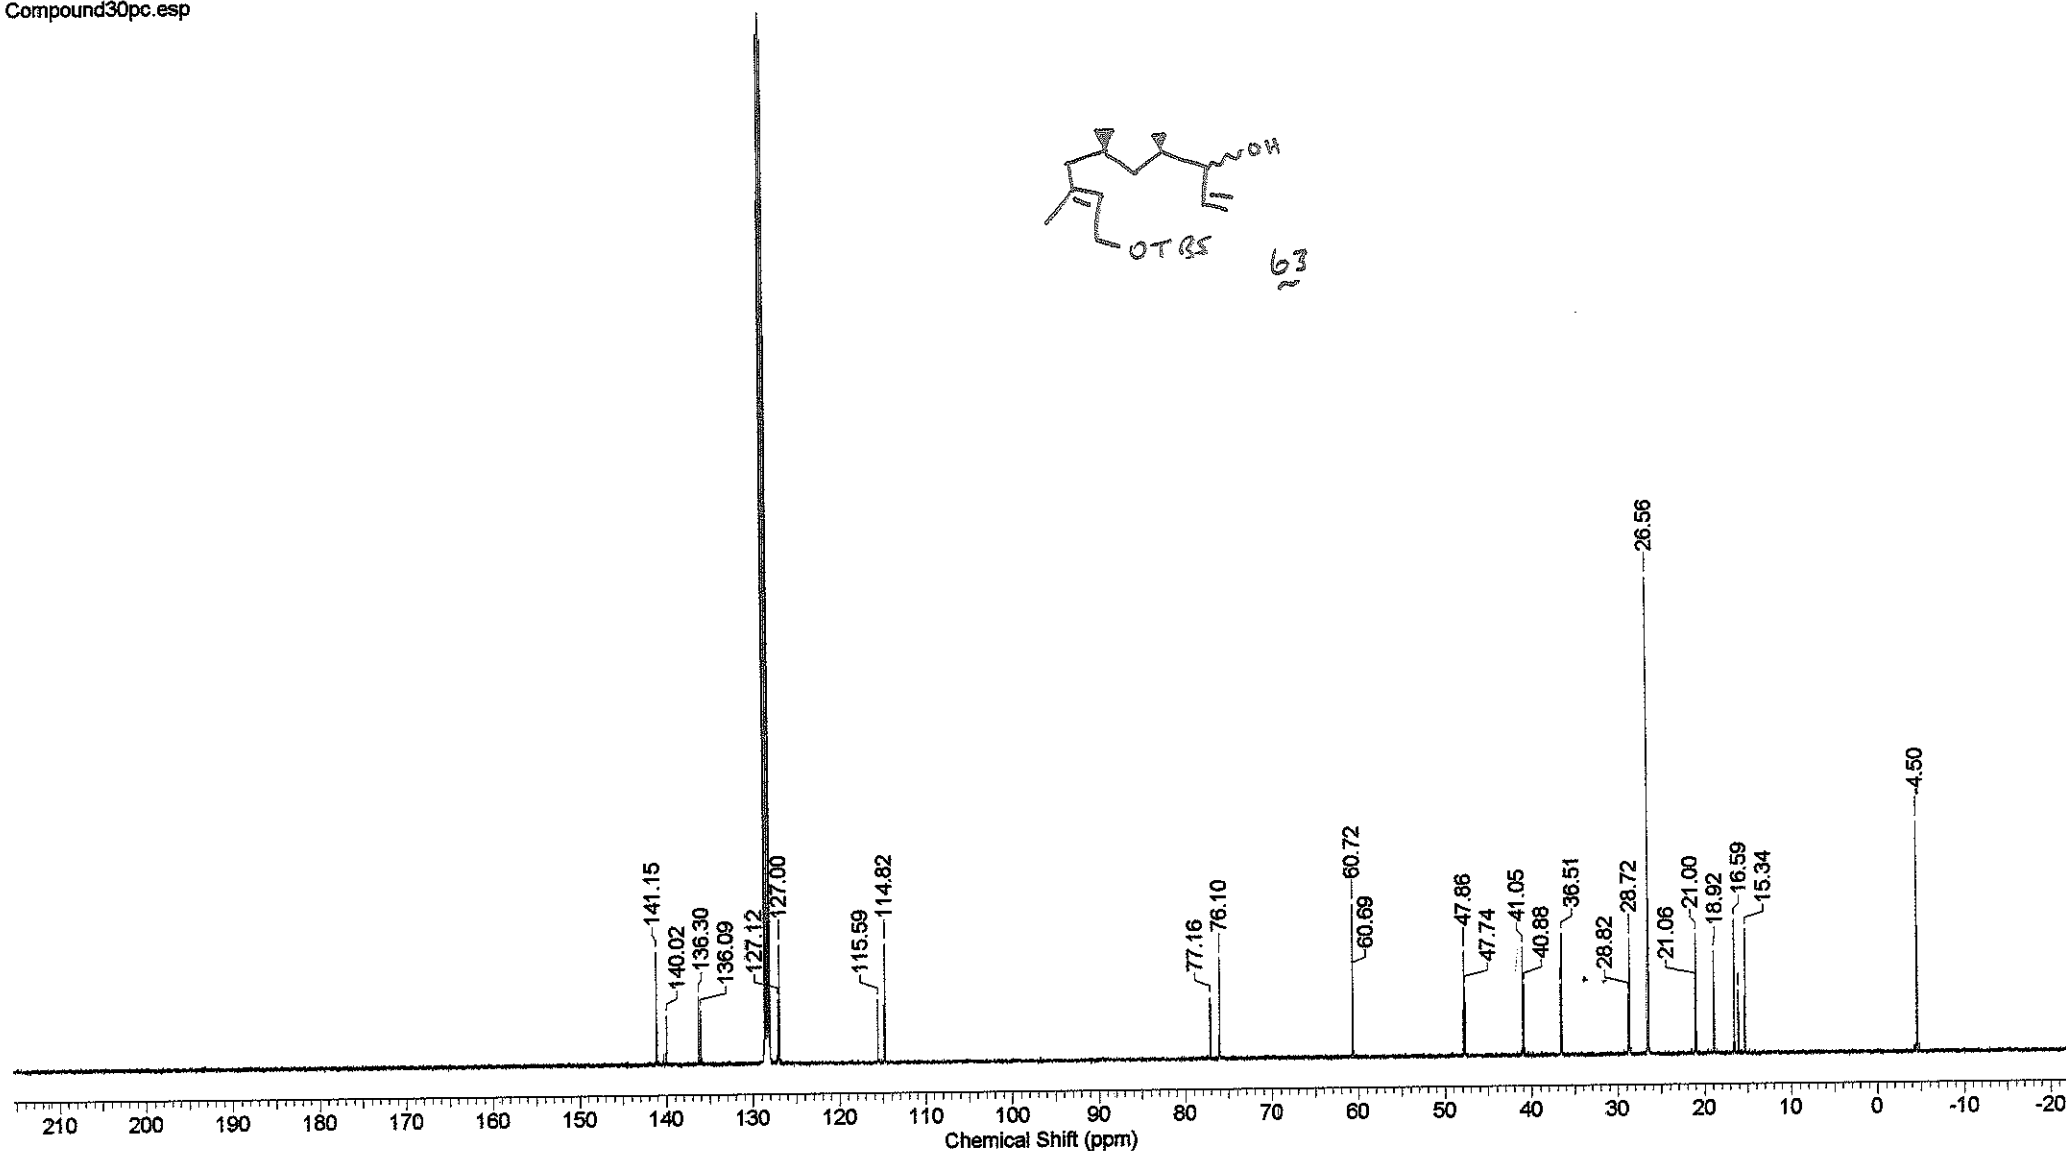

|                        |                      |                        |                                                                     |                      |                      |
|------------------------|----------------------|------------------------|---------------------------------------------------------------------|----------------------|----------------------|
| Acquisition Time (sec) | 3.9649               | Comment                | MWG006pp mPROTON C6D6 {e:\bruk400data\2011\Sep} ejt 53              | Date                 | 01 Oct 2011 19:44:00 |
| Date Stamp             | 01 Oct 2011 19:44:00 | File Name              | F:\Chemistry\Year 3 data\NMR data\Data\Compound 31\MWG006pp_000001r |                      |                      |
| Frequency (MHz)        | 400.13               | Nucleus                | 1H                                                                  | Number of Transients | 16                   |
| Original Points Count  | 32768                | Owner                  | Administrator                                                       | Points Count         | 32768                |
| Receiver Gain          | 22.60                | SW(cyclical) (Hz)      | 8264.46                                                             | Pulse Sequence       | zg30b                |
| Sweep Width (Hz)       | 8264.21              | Temperature (degree C) | 20.900                                                              | Solvent              | BENZENE-d6           |
|                        |                      |                        |                                                                     | Spectrum Offset (Hz) | 2425.9573            |

Compound31pp.esp

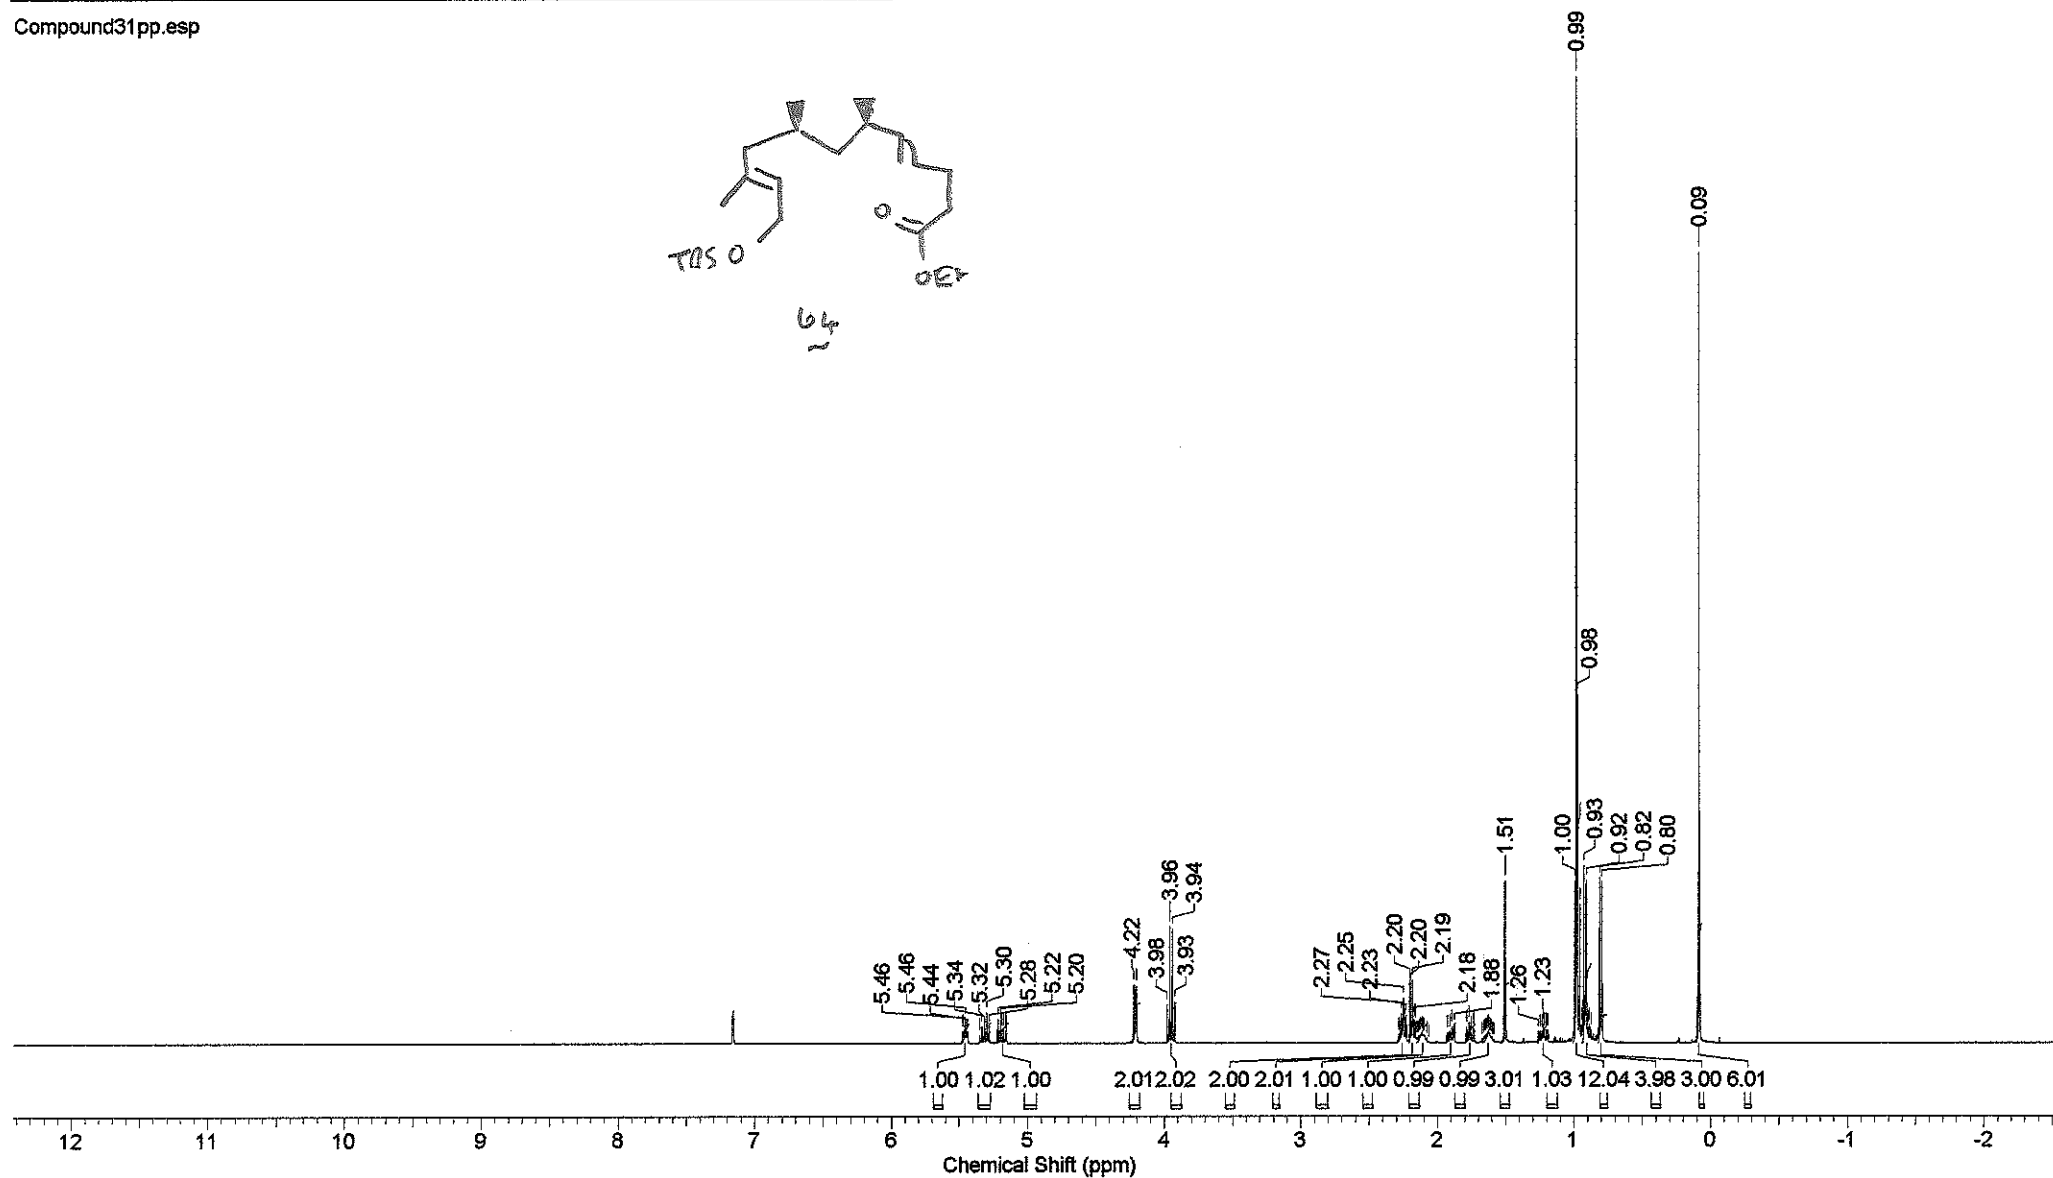

|                        |                      |                        |                                                                     |                      |                      |
|------------------------|----------------------|------------------------|---------------------------------------------------------------------|----------------------|----------------------|
| Acquisition Time (sec) | 1.0835               | Comment                | MVG006pc mCARBON C6D6 {e:\bruk400data\2011\Sep} eit 53              | Date                 | 01 Oct 2011 20:07:28 |
| Date Stamp             | 01 Oct 2011 20:07:28 | File Name              | F:\Chemistry\Year 3 data\NMR data\Data\Compound 31\MVG006pc_000001r |                      |                      |
| Frequency (MHz)        | 100.61               | Nucleus                | <sup>13</sup> C                                                     | Number of Transients | 256                  |
| Original Points Count  | 32768                | Owner                  | Administrator                                                       | Points Count         | 32768                |
| Receiver Gain          | 512.00               | SW(cyclical) (Hz)      | 30241.94                                                            | Pulse Sequence       | zgpg30               |
| Sweep Width (Hz)       | 30241.01             | Temperature (degree C) | 21.600                                                              | Solvent              | BENZENE-d6           |
|                        |                      |                        |                                                                     | Spectrum Offset (Hz) | 11397.1748           |

Compound31pc.esp

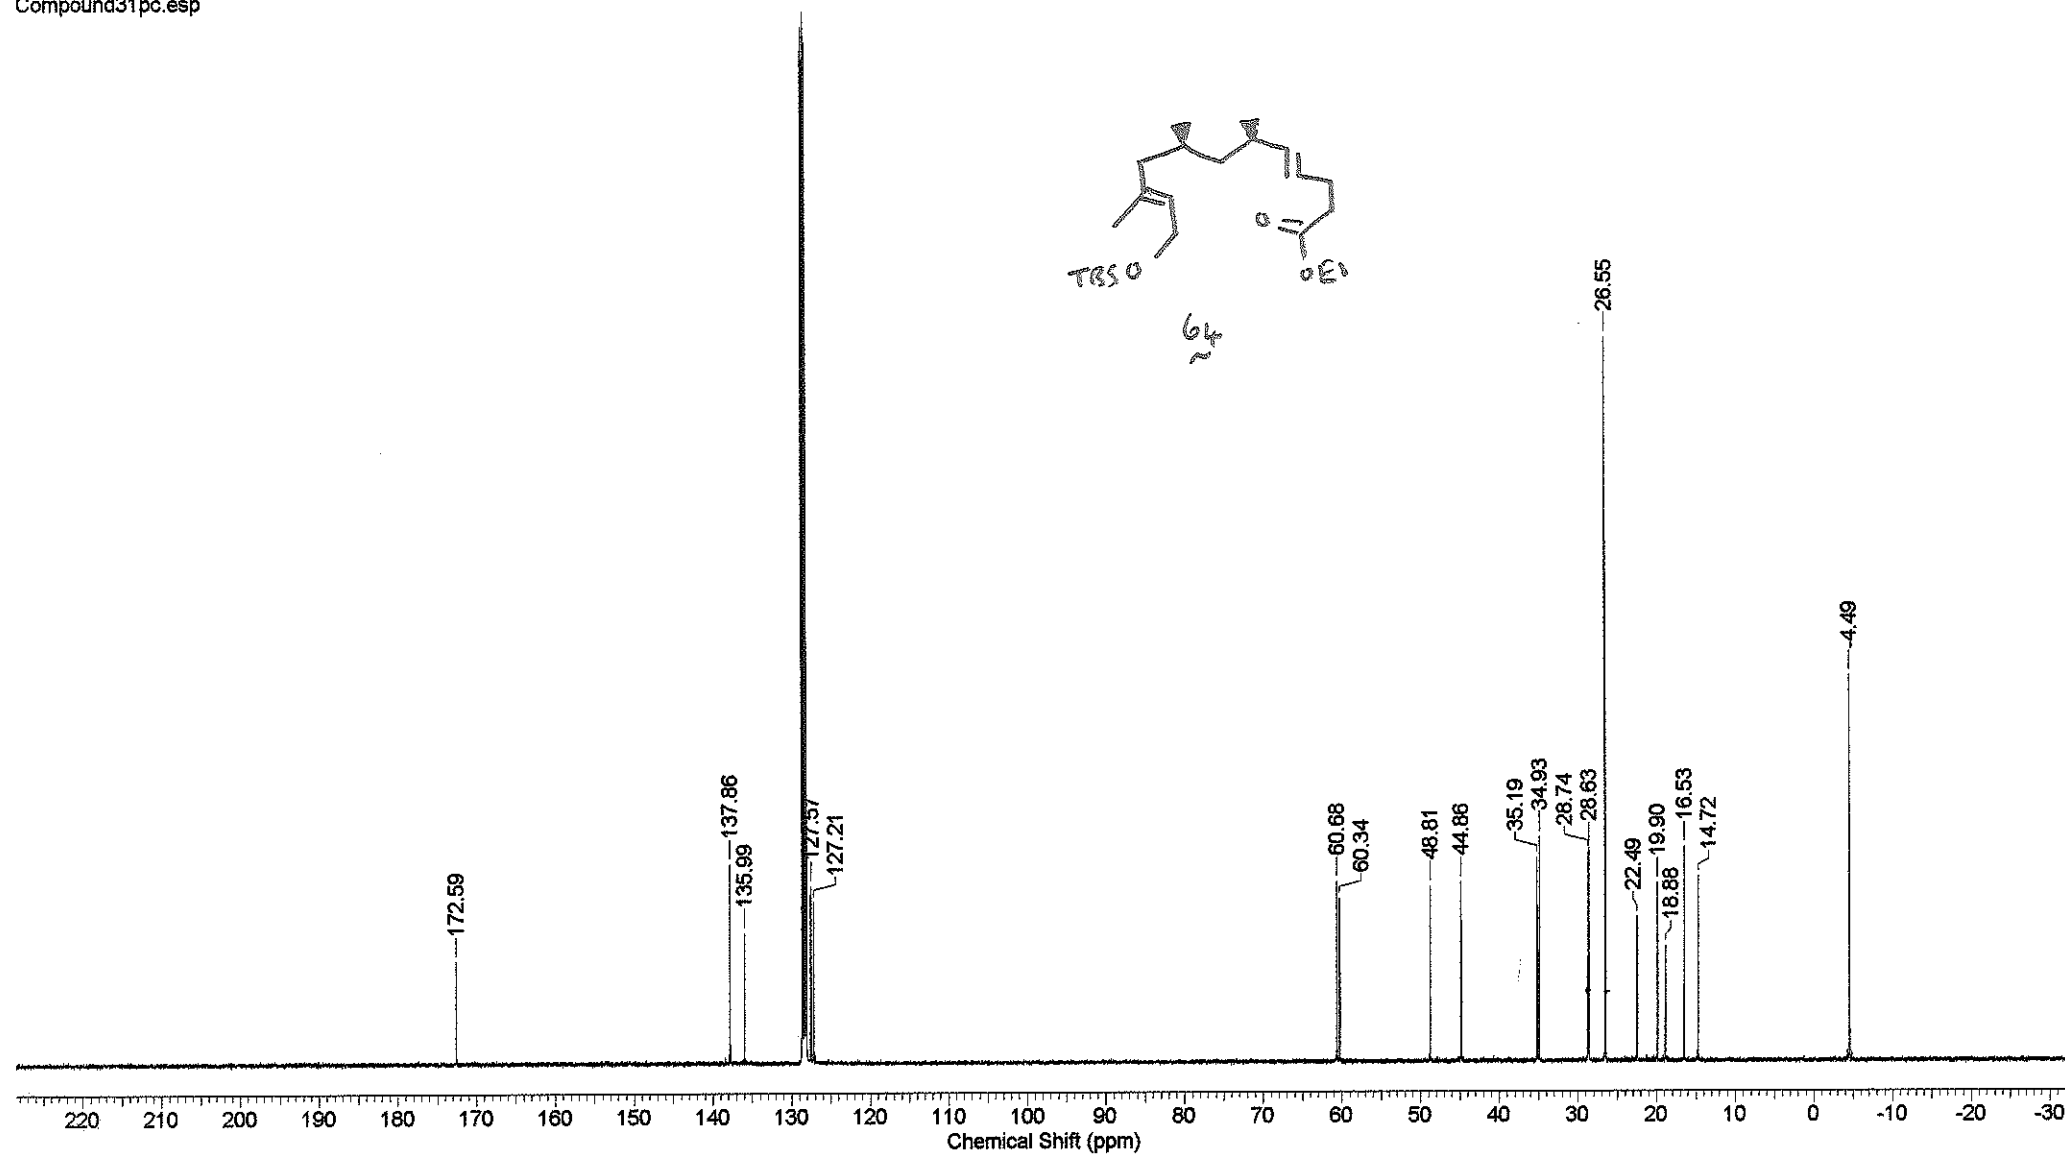

|                        |                      |                        |                                                                     |                      |                      |
|------------------------|----------------------|------------------------|---------------------------------------------------------------------|----------------------|----------------------|
| Acquisition Time (sec) | 3.9649               | Comment                | MWG009pp mPROTON C6D6 {e:\bruk400data\2011\Dec} ejt 16              | Date                 | 08 Dec 2011 14:53:52 |
| Date Stamp             | 08 Dec 2011 14:53:52 | File Name              | F:\Chemistry\Year 3 data\NMR data\Data\Compound 32\MWG009pp_000001r |                      |                      |
| Frequency (MHz)        | 400.13               | Nucleus                | <sup>1</sup> H                                                      | Number of Transients | 16                   |
| Original Points Count  | 32768                | Owner                  | Administrator                                                       | Points Count         | 32768                |
| Receiver Gain          | 101.00               | SW(cyclical) (Hz)      | 8264.46                                                             | Pulse Sequence       | zg30b                |
| Sweep Width (Hz)       | 8264.21              | Temperature (degree C) | 21.100                                                              | Solvent              | BENZENE-d6           |
|                        |                      |                        |                                                                     | Spectrum Offset (Hz) | 2426.4619            |

Compound32pp.esp

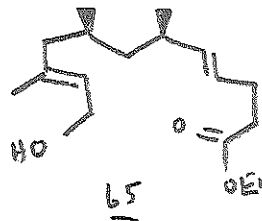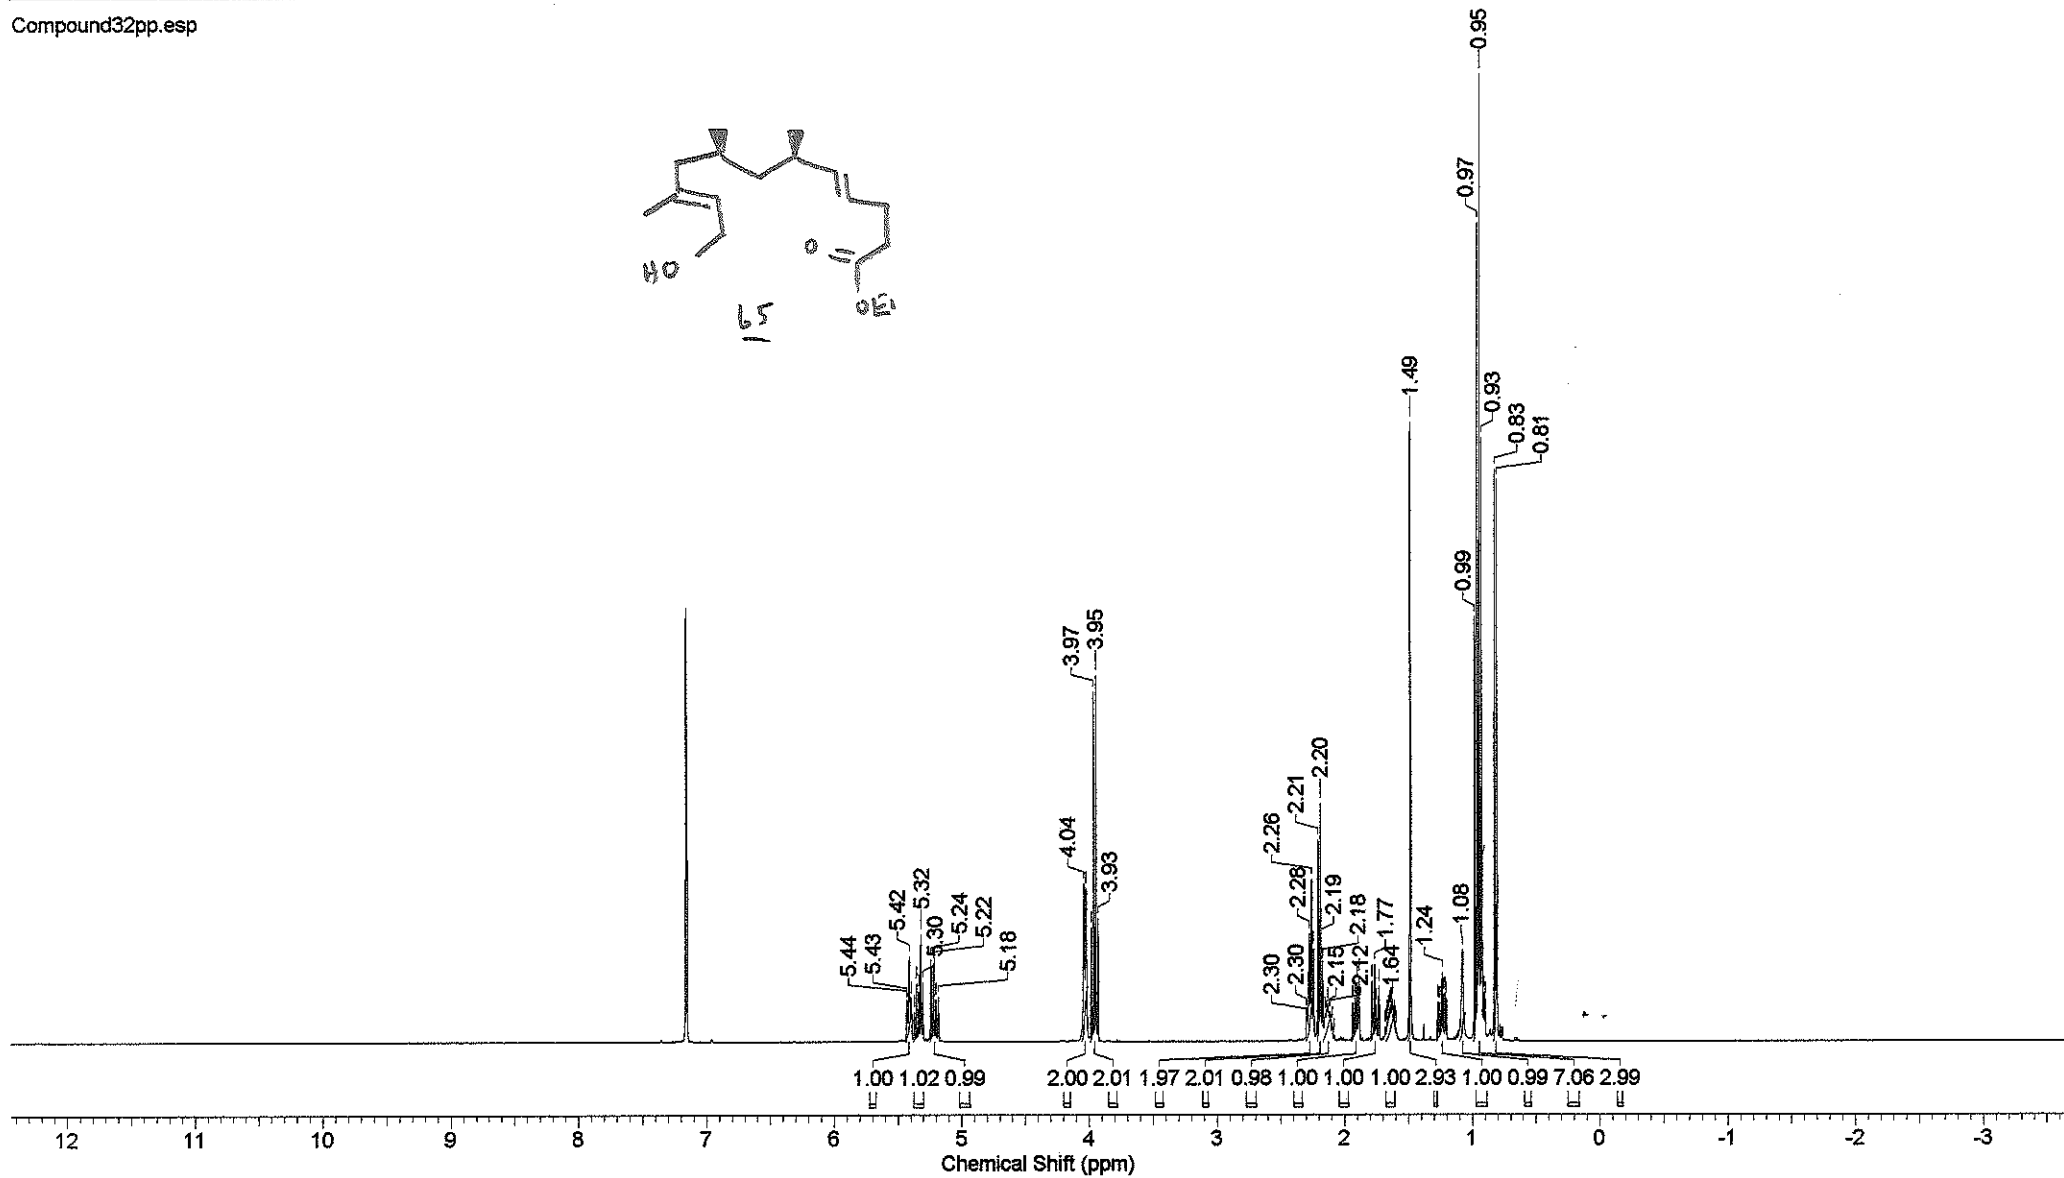

|                        |                      |                        |                                                                     |                      |                      |
|------------------------|----------------------|------------------------|---------------------------------------------------------------------|----------------------|----------------------|
| Acquisition Time (sec) | 1.0835               | Comment                | MWG009pc mCARBON C6D6 {e:\bruk400data\2011\Oct} ejt 6               | Date                 | 10 Oct 2011 07:10:56 |
| Date Stamp             | 10 Oct 2011 07:10:56 | File Name              | F:\Chemistry\Year 3 data\NMR data\Data\Compound 32\MWG009pc_000001r |                      |                      |
| Frequency (MHz)        | 100.61               | Nucleus                | 13C                                                                 | Number of Transients | 256                  |
| Original Points Count  | 32768                | Owner                  | Administrator                                                       | Points Count         | 32768                |
| Receiver Gain          | 512.00               | SW(cyclical) (Hz)      | 30241.94                                                            | Solvent              | BENZENE-d6           |
| Sweep Width (Hz)       | 30241.01             | Temperature (degree C) | 22.700                                                              | Spectrum Offset (Hz) | 11394.4072           |

Compound32pc.esp

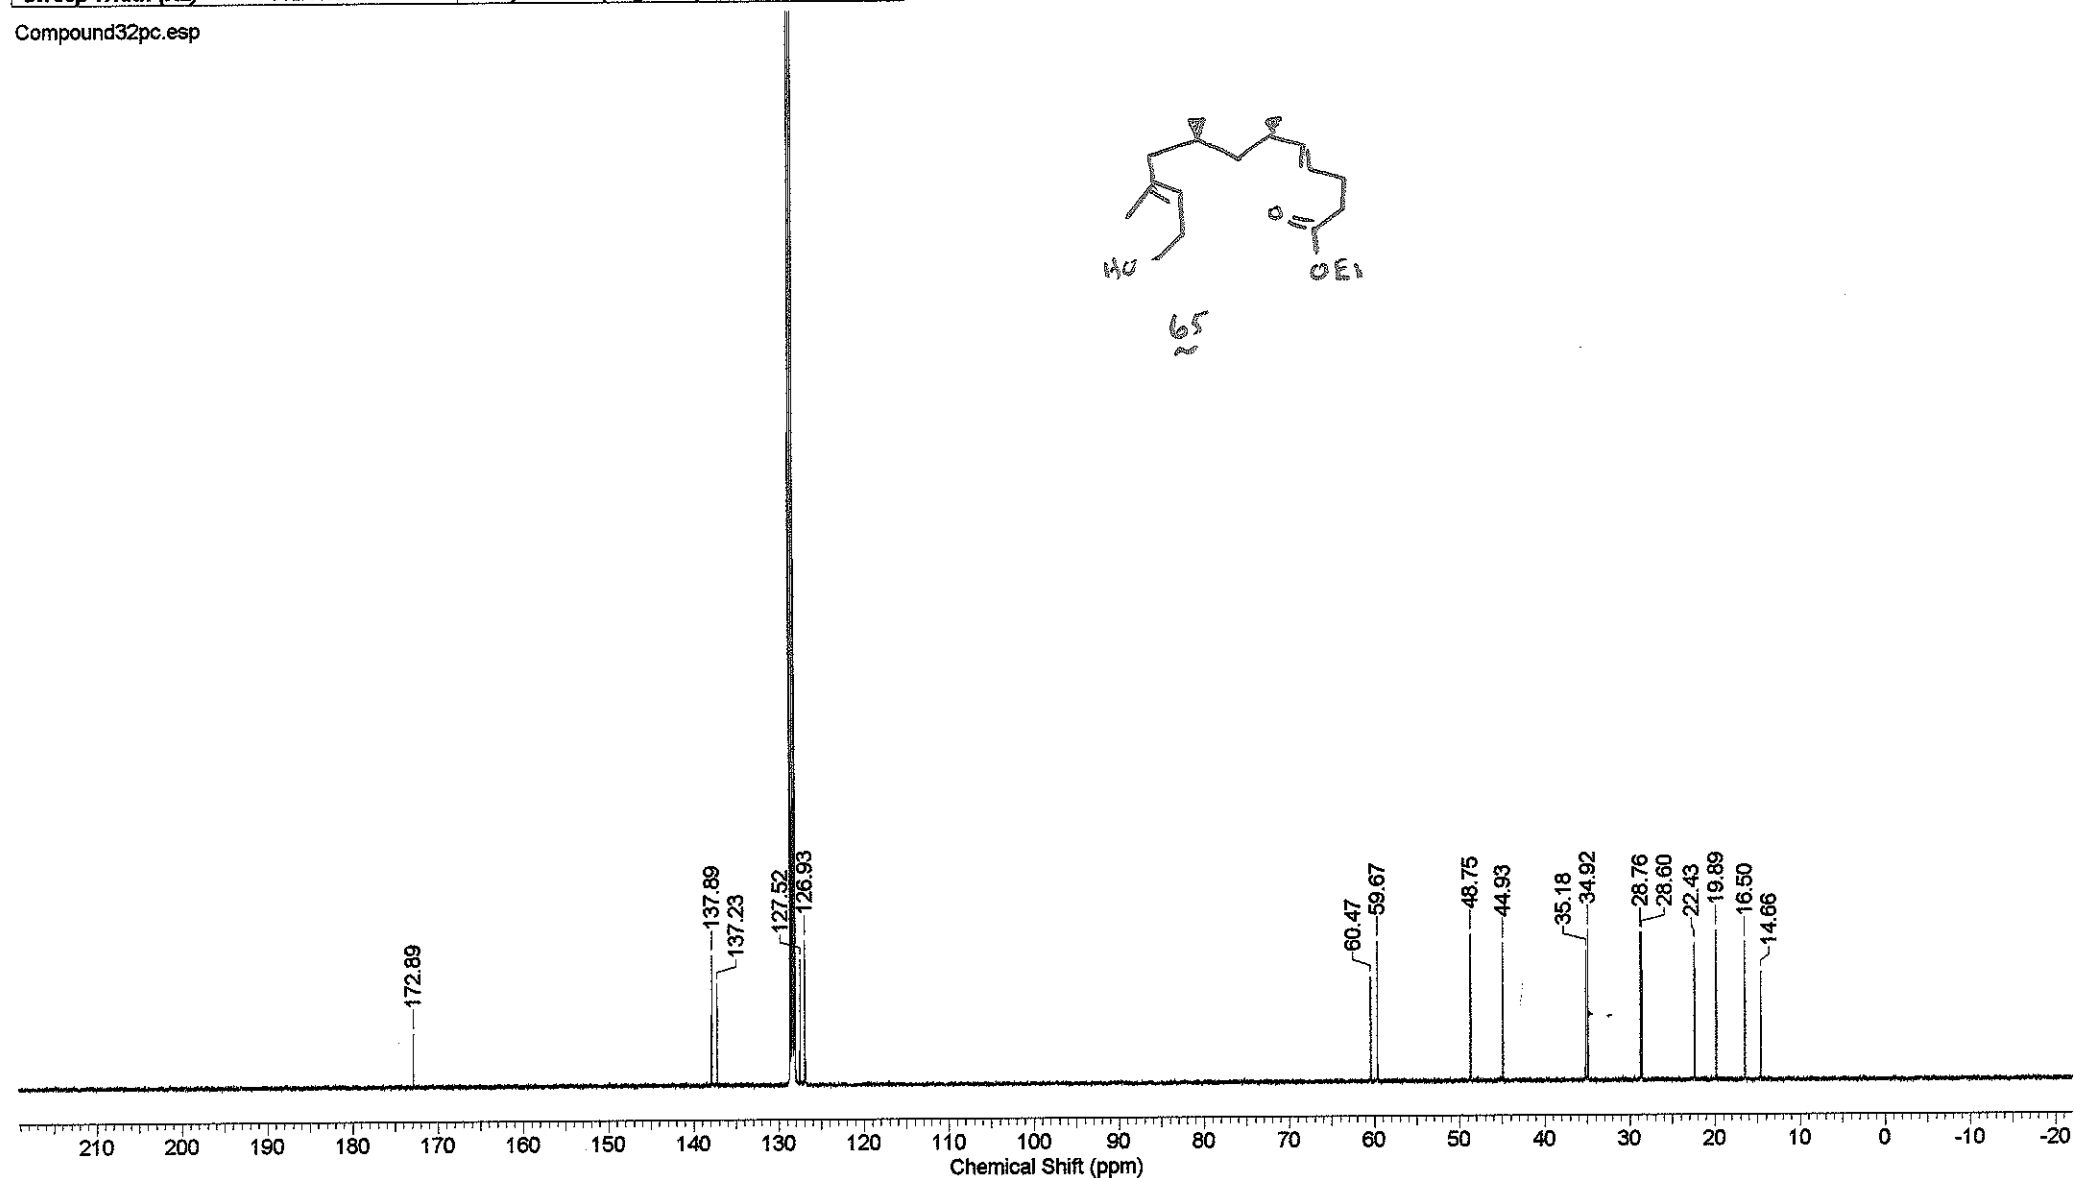

|                        |                      |                        |                                                                      |                      |                      |
|------------------------|----------------------|------------------------|----------------------------------------------------------------------|----------------------|----------------------|
| Acquisition Time (sec) | 3.9649               | Comment                | MWVG055pp mPROTON C6D6 {e:\bruk400data\2011\Nov} ejt 3               | Date                 | 08 Nov 2011 15:21:36 |
| Date Stamp             | 08 Nov 2011 15:21:36 | File Name              | F:\Chemistry\Year 3 data\NMR data\Data\Compound 34\MWVG055pp_000001r |                      |                      |
| Frequency (MHz)        | 400.13               | Nucleus                | 1H                                                                   | Number of Transients | 16                   |
| Original Points Count  | 32768                | Owner                  | Administrator                                                        | Points Count         | 32768                |
| Receiver Gain          | 36.00                | SW(cyclical) (Hz)      | 8264.46                                                              | Solvent              | BENZENE-d6           |
| Sweep Width (Hz)       | 8264.21              | Temperature (degree C) | 19.900                                                               | Spectrum Offset (Hz) | 2426.2097            |

Compound34pp.esp

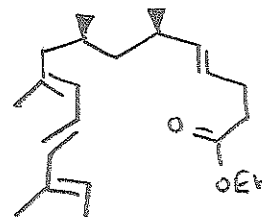

(4E,10E,12E,14E) : (4E,10E,12Z,14E) : (4E,10E,12E,14Z)

= 91 : 4 : 5

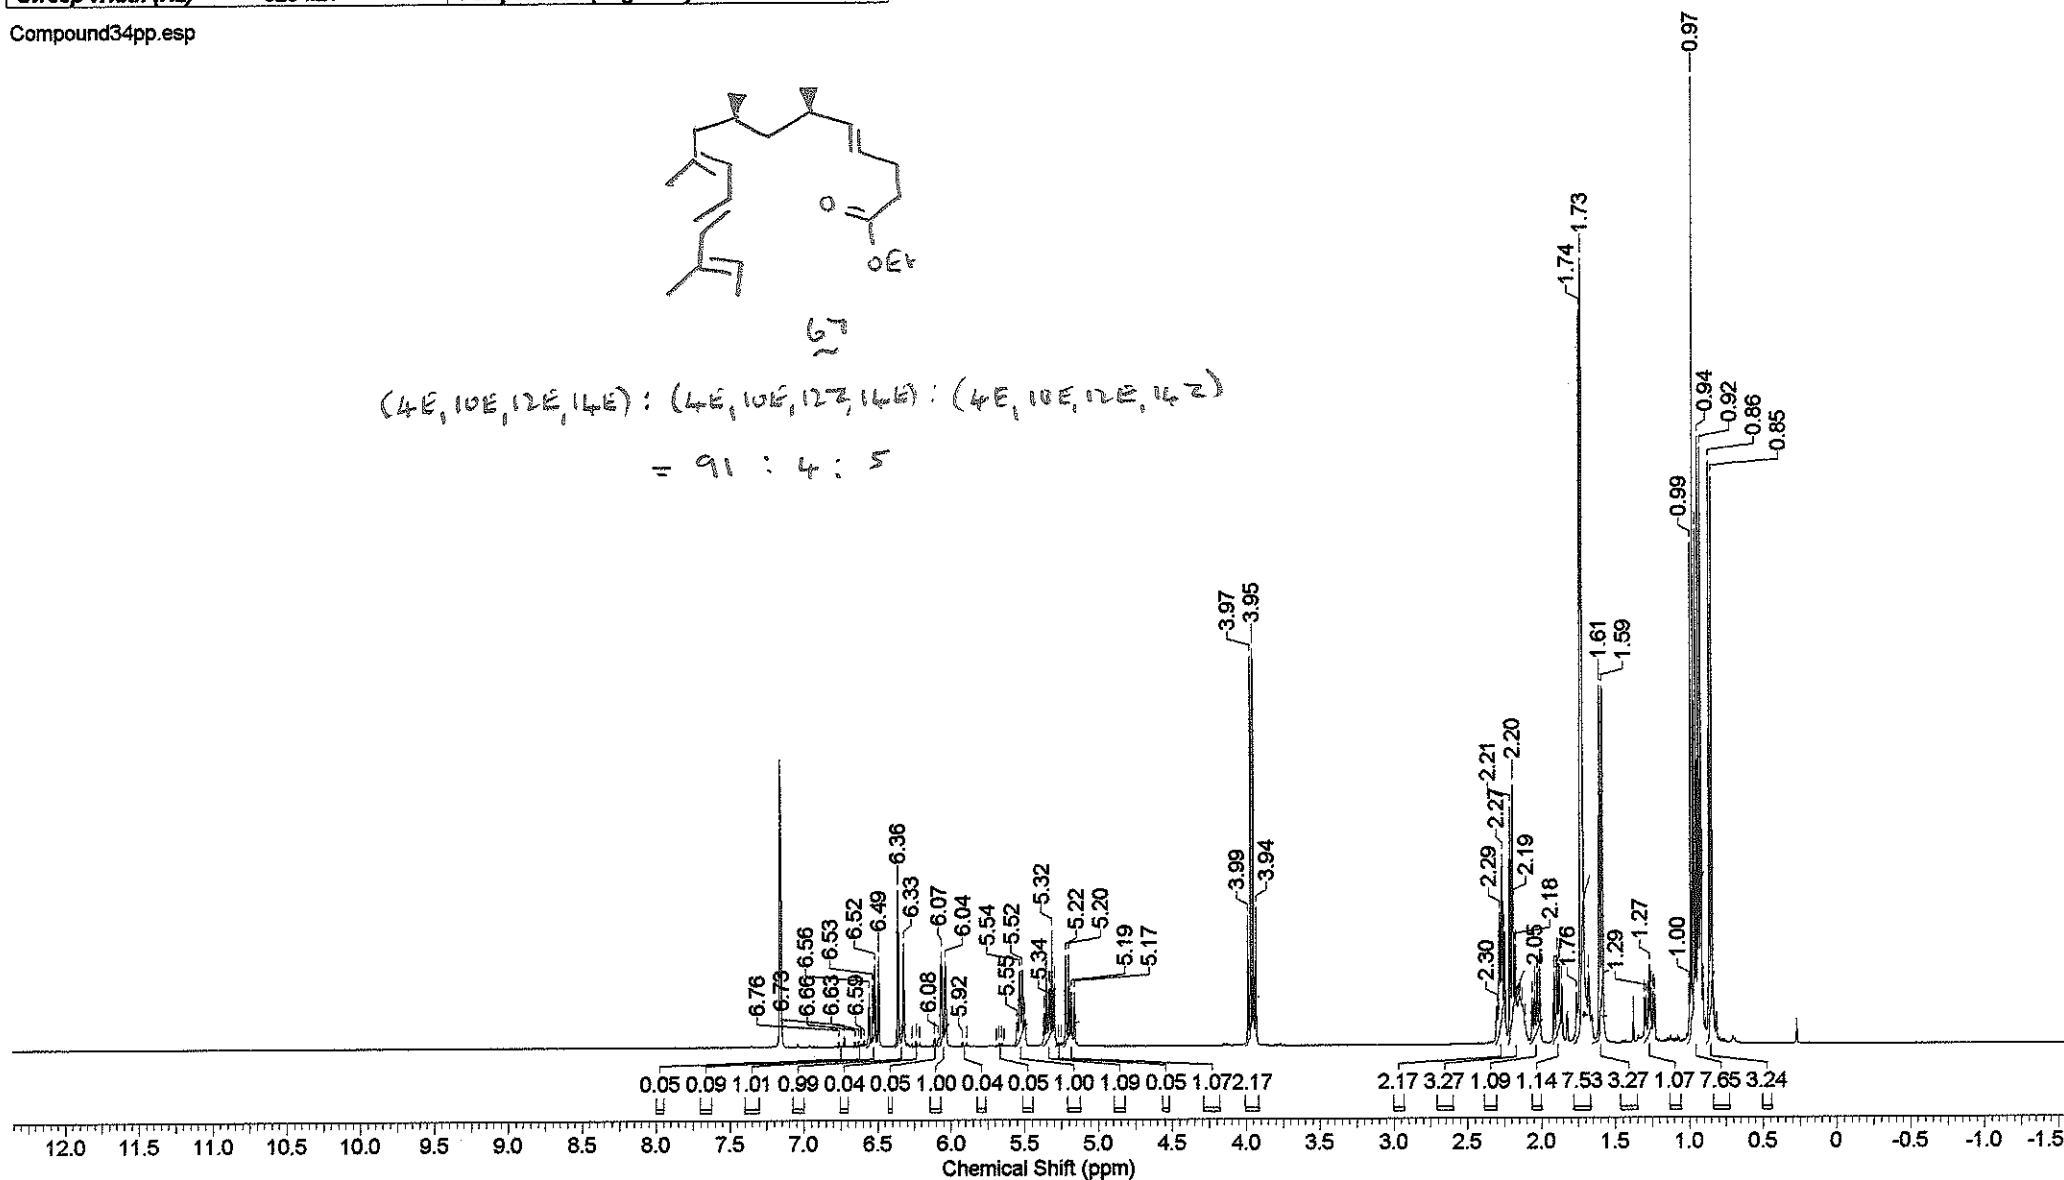

|                        |                      |                        |                                                                      |                      |                      |
|------------------------|----------------------|------------------------|----------------------------------------------------------------------|----------------------|----------------------|
| Acquisition Time (sec) | 3.9649               | Comment                | MWVG055pp mPROTON C6D6 {e:\bruk400data\2011\Nov} ejt 3               | Date                 | 08 Nov 2011 15:21:36 |
| Date Stamp             | 08 Nov 2011 15:21:36 | File Name              | F:\Chemistry\Year 3 data\NMR data\Data\Compound 34\MWVG055pp_000001r |                      |                      |
| Frequency (MHz)        | 400.13               | Nucleus                | 1H                                                                   | Number of Transients | 16                   |
| Original Points Count  | 32768                | Owner                  | Administrator                                                        | Points Count         | 32768                |
| Receiver Gain          | 36.00                | SW(cyclical) (Hz)      | 8264.46                                                              | Solvent              | BENZENE-d6           |
| Sweep Width (Hz)       | 8264.21              | Temperature (degree C) | 19.900                                                               | Pulse Sequence       | zg30b                |
|                        |                      |                        |                                                                      | Spectrum Offset (Hz) | 2426.2097            |

Compound34pp.esp

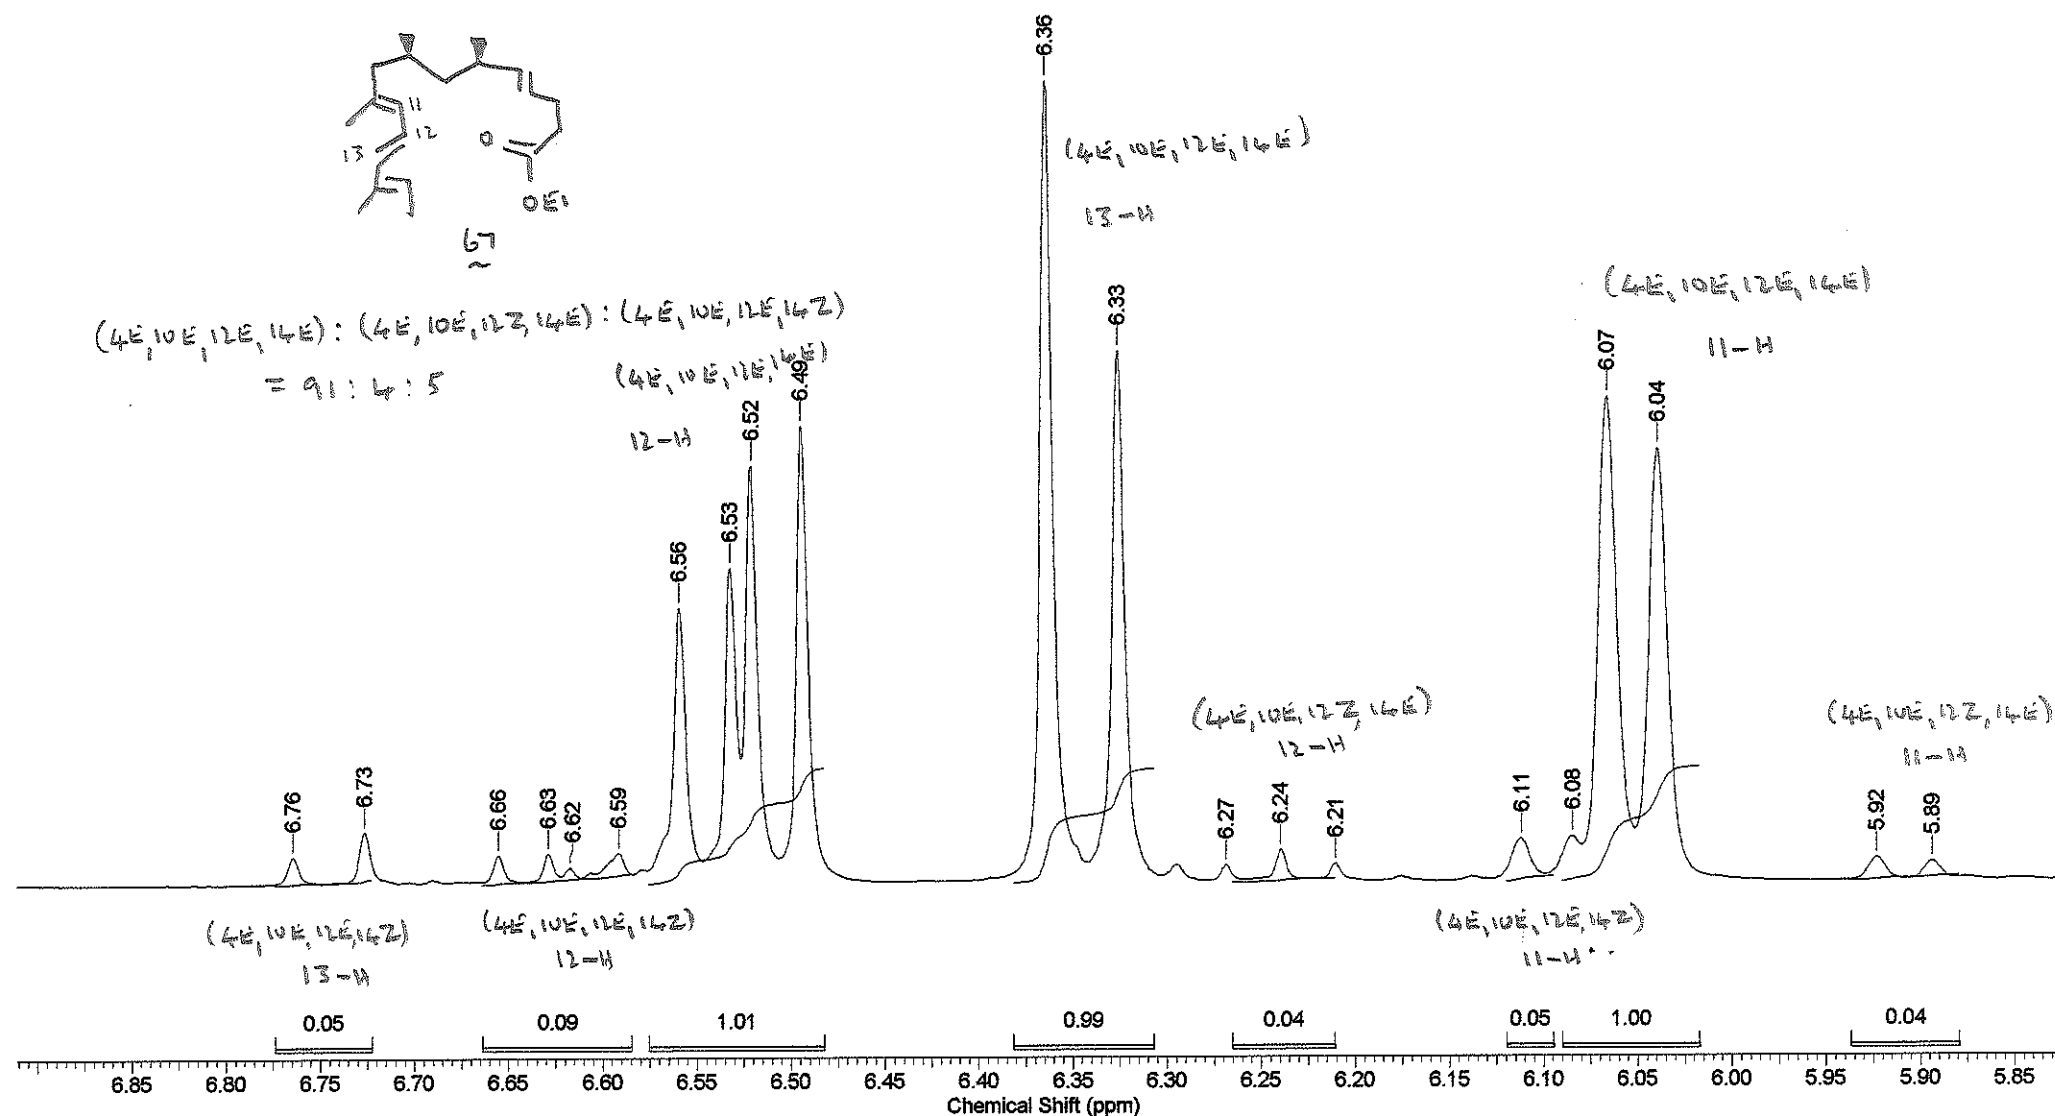



67

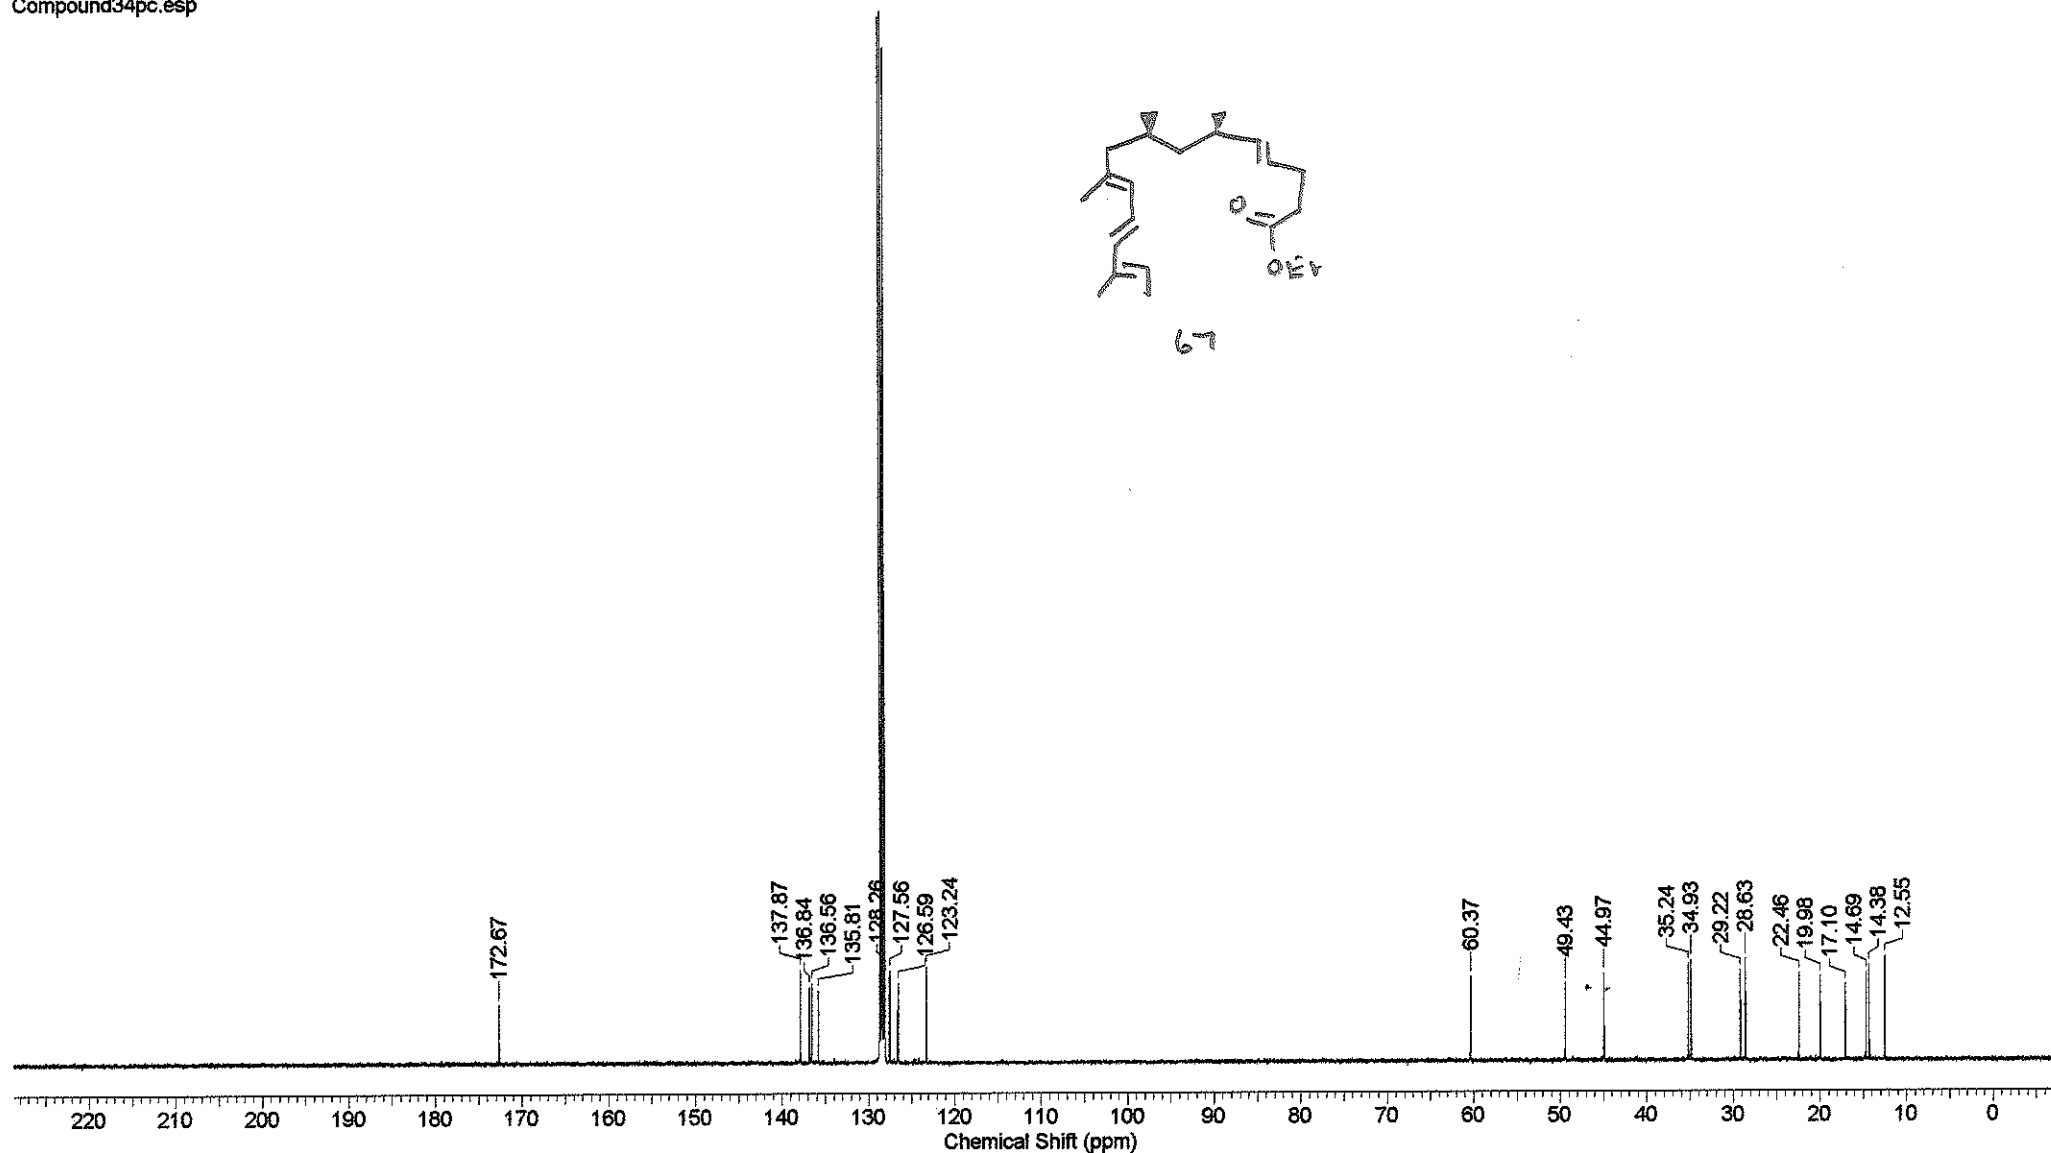

|                               |                      |                               |                                                                     |                             |                      |
|-------------------------------|----------------------|-------------------------------|---------------------------------------------------------------------|-----------------------------|----------------------|
| <b>Acquisition Time (sec)</b> | 3.9649               | <b>Comment</b>                | MWG078pp mPROTON C6D6 {e:\bruk400data\2011\Dec} ejt 37              | <b>Date</b>                 | 08 Dec 2011 09:12:32 |
| <b>Date Stamp</b>             | 08 Dec 2011 09:12:32 | <b>File Name</b>              | F:\Chemistry\Year 3 data\NMR data\Data\Compound 36\MWG078pp_000001r |                             |                      |
| <b>Frequency (MHz)</b>        | 400.13               | <b>Nucleus</b>                | 1H                                                                  | <b>Number of Transients</b> | 16                   |
| <b>Original Points Count</b>  | 32768                | <b>Owner</b>                  | Administrator                                                       | <b>Points Count</b>         | 32768                |
| <b>Receiver Gain</b>          | 80.60                | <b>SW(cyclical) (Hz)</b>      | 8264.46                                                             | <b>Solvent</b>              | BENZENE-d6           |
| <b>Sweep Width (Hz)</b>       | 8264.21              | <b>Temperature (degree C)</b> | 20.900                                                              | <b>Pulse Sequence</b>       | zg30b                |
|                               |                      |                               |                                                                     | <b>Spectrum Offset (Hz)</b> | 2426.4619            |

Compound36pp.esp

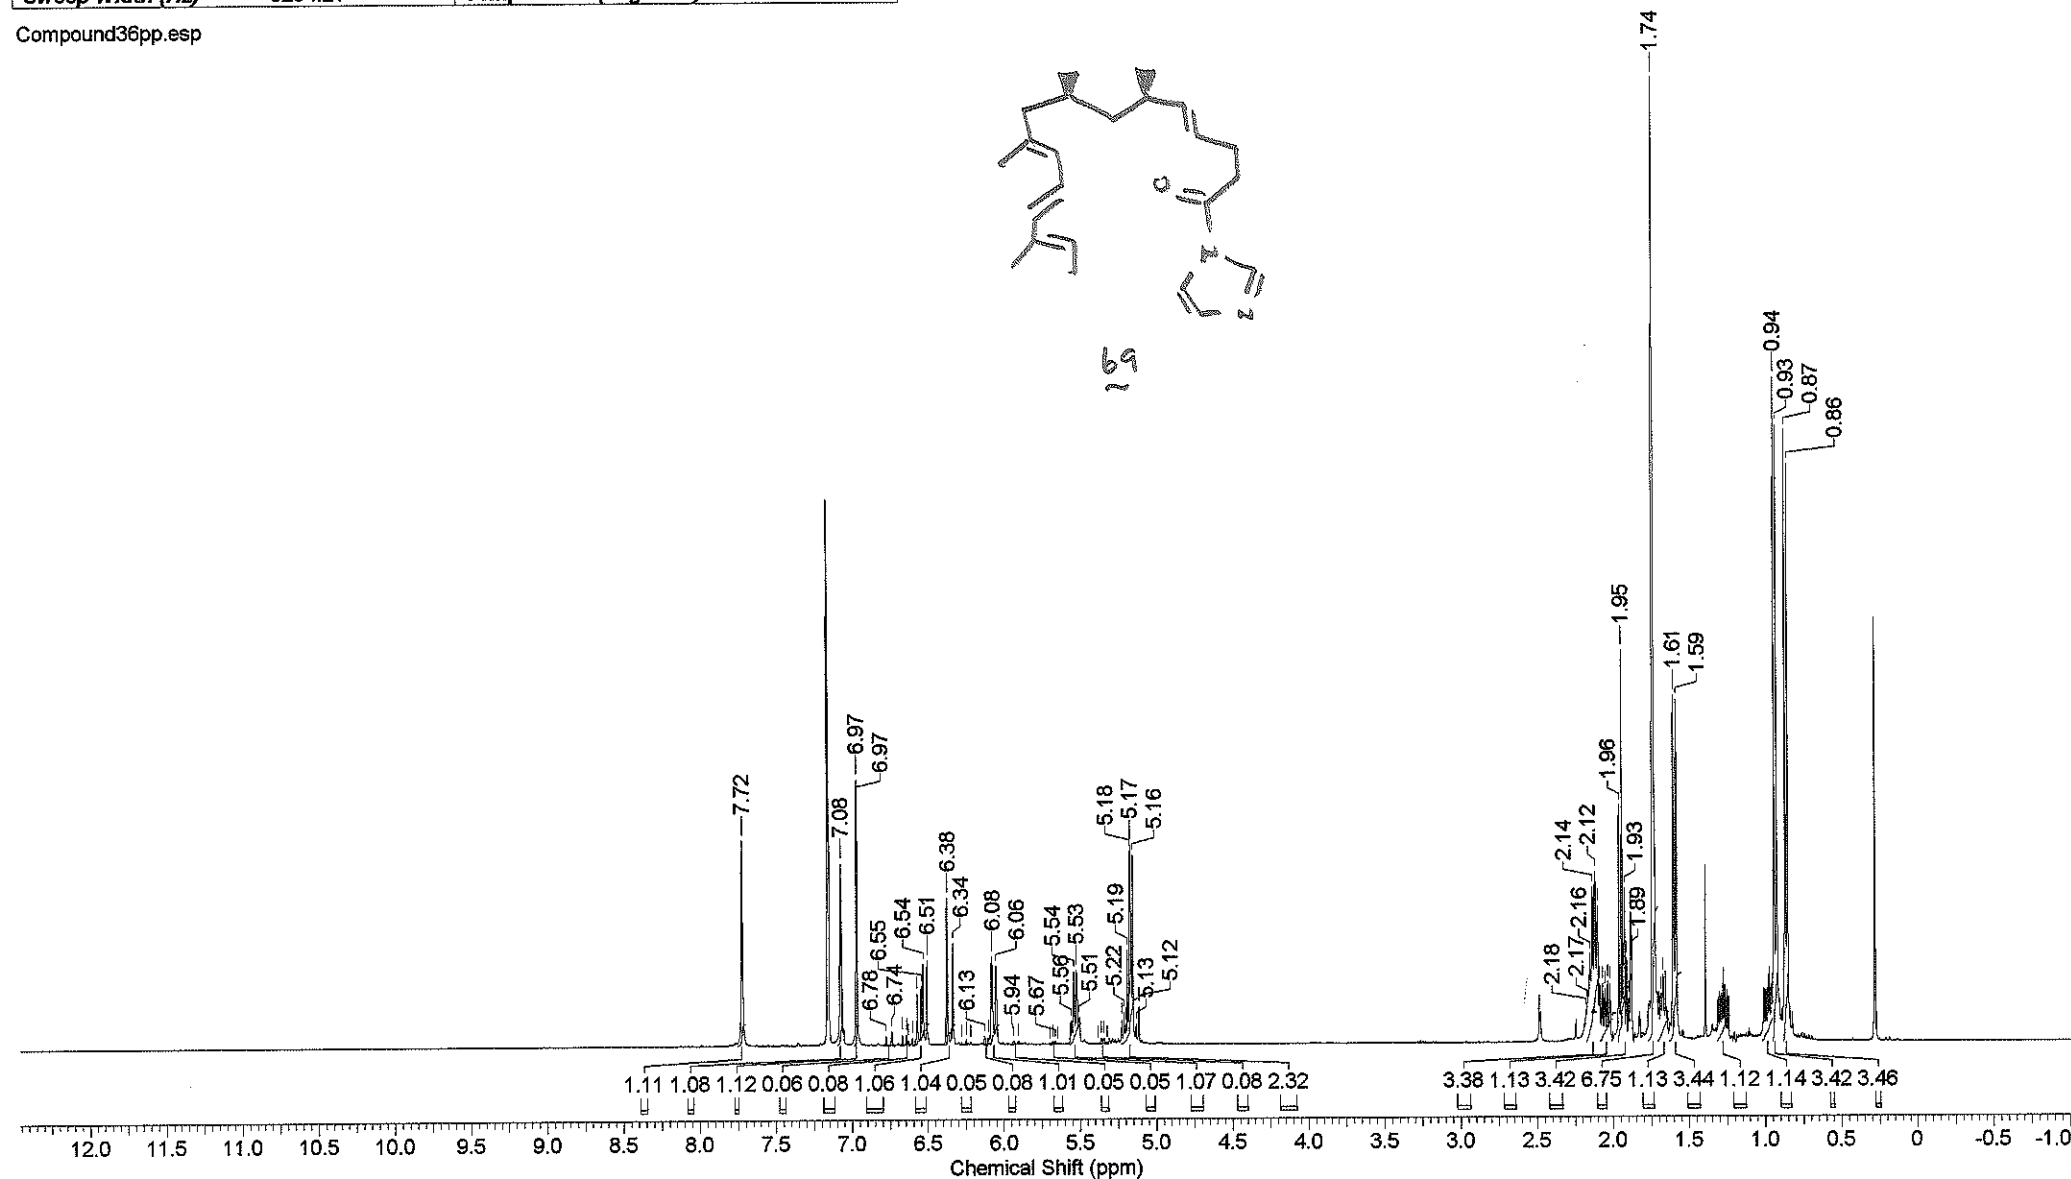

|                        |                      |                        |                                                                     |                      |                      |
|------------------------|----------------------|------------------------|---------------------------------------------------------------------|----------------------|----------------------|
| Acquisition Time (sec) | 1.0835               | Comment                | MWG078pc mCARBON C6D6 {e:\bruk400data\2011\Dec} ejt 37              | Date                 | 08 Dec 2011 09:36:00 |
| Date Stamp             | 08 Dec 2011 09:36:00 | File Name              | F:\Chemistry\Year 3 data\NMR data\Data\Compound 36\MWG078pc_000001r |                      |                      |
| Frequency (MHz)        | 100.61               | Nucleus                | 13C                                                                 | Number of Transients | 256                  |
| Original Points Count  | 32768                | Owner                  | Administrator                                                       | Points Count         | 32768                |
| Receiver Gain          | 512.00               | SW(cyclical) (Hz)      | 30241.94                                                            | Solvent              | BENZENE-d6           |
| Sweep Width (Hz)       | 30241.01             | Temperature (degree C) | 21.600                                                              | Spectrum Offset (Hz) | 11393.5020           |

Compound36pc.esp

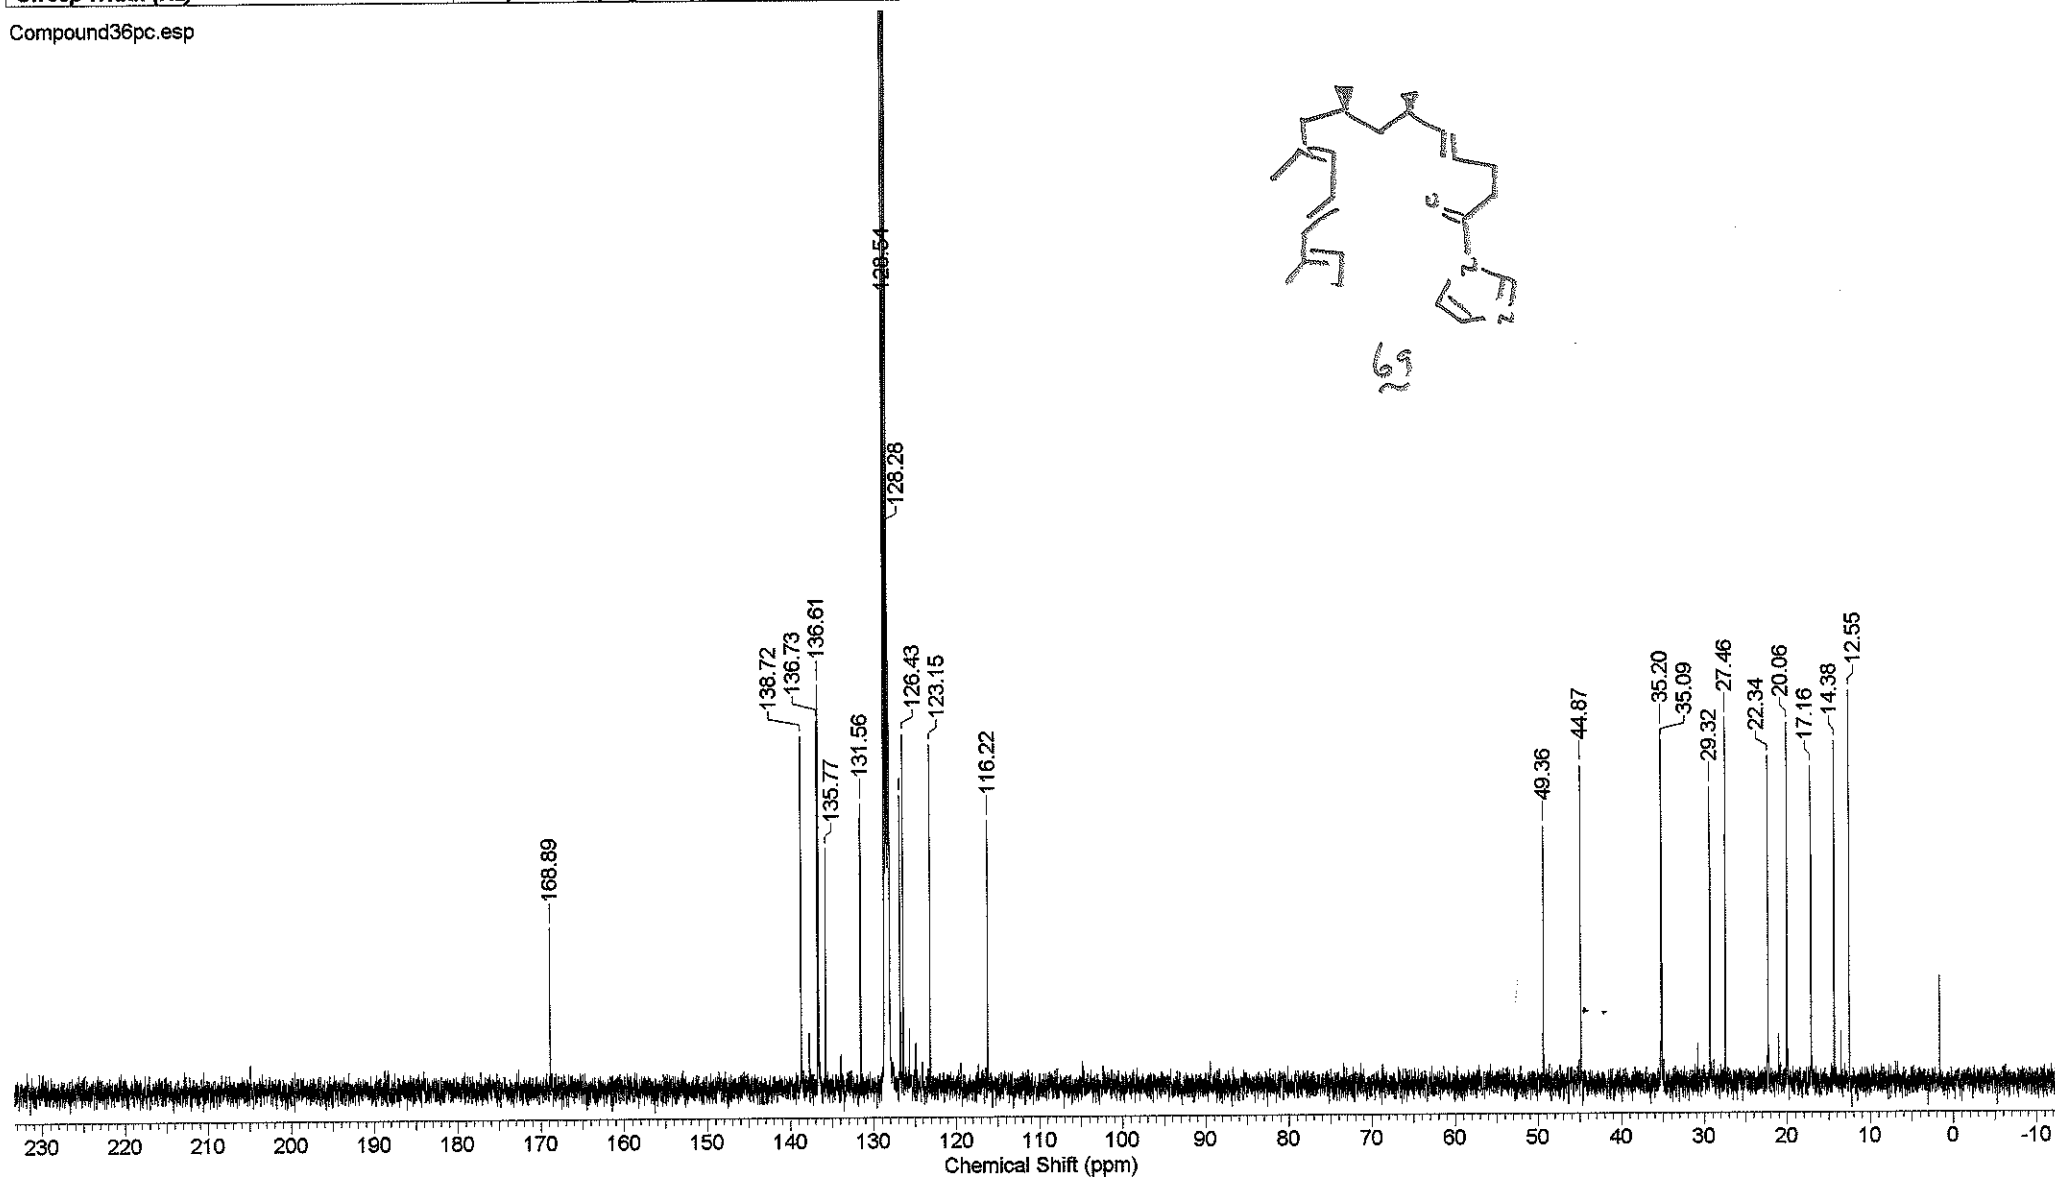

|                        |                      |                        |                                                                     |                      |                      |
|------------------------|----------------------|------------------------|---------------------------------------------------------------------|----------------------|----------------------|
| Acquisition Time (sec) | 3.9649               | Comment                | MWG086pp mPROTON C6D6 (e:\bruk400data\2011\Dec) ejt 6               | Date                 | 19 Dec 2011 08:55:28 |
| Date Stamp             | 19 Dec 2011 08:55:28 | File Name              | F:\Chemistry\Year 3 data\NMR data\Data\Compound 39\MWG086pp_000001r |                      |                      |
| Frequency (MHz)        | 400.13               | Nucleus                | 1H                                                                  | Number of Transients | 16                   |
| Original Points Count  | 32768                | Owner                  | Administrator                                                       | Points Count         | 32768                |
| Receiver Gain          | 36.00                | SW(cyclical) (Hz)      | 8264.46                                                             | Solvent              | BENZENE-d6           |
| Sweep Width (Hz)       | 8264.21              | Temperature (degree C) | 19.900                                                              | Pulse Sequence       | zg30b                |
|                        |                      |                        |                                                                     | Spectrum Offset (Hz) | 2426.2092            |

Compound39pp.esp

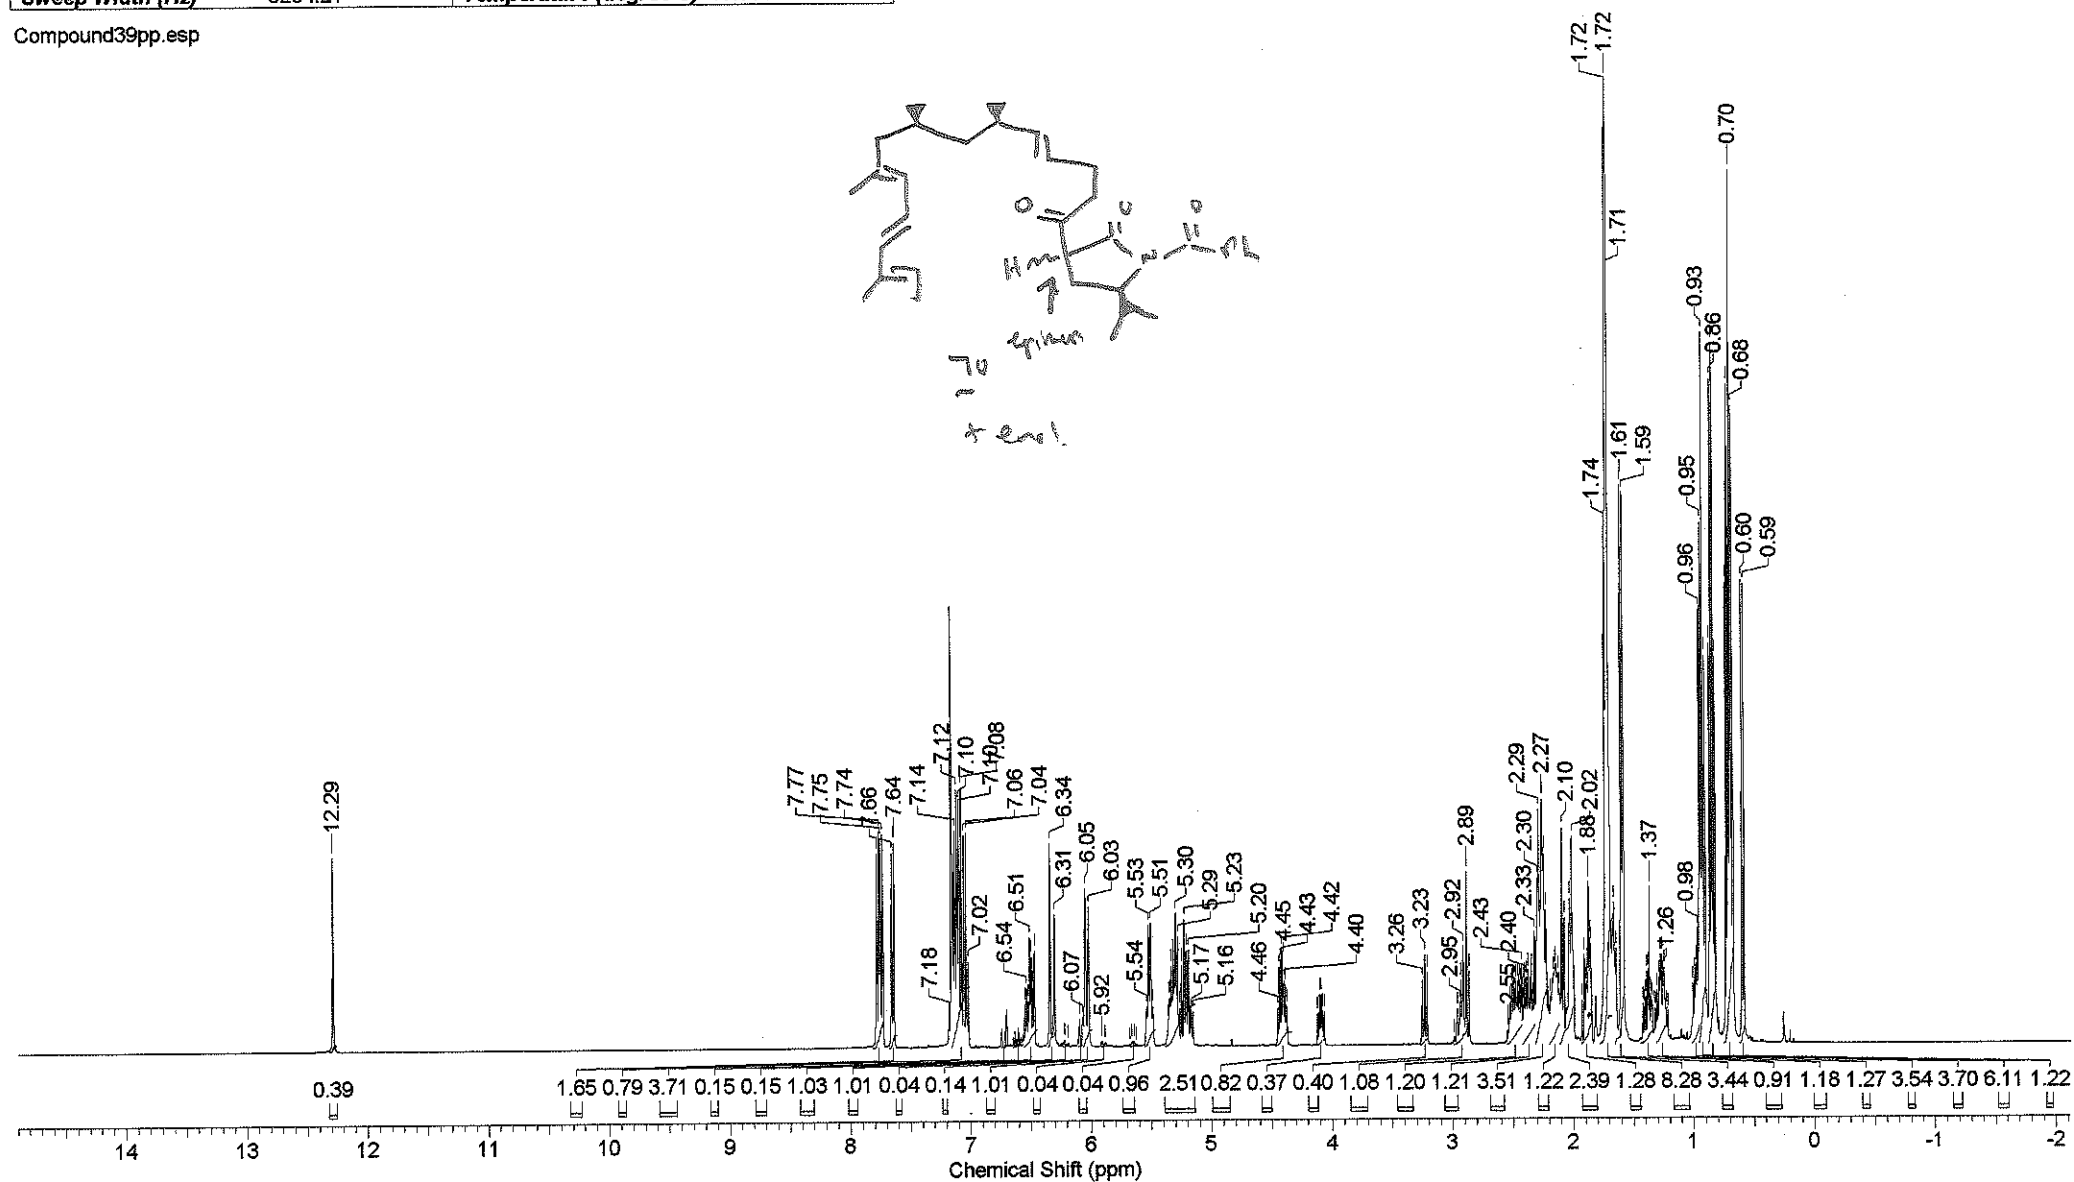

|                        |                      |                        |                                                                     |                      |                      |
|------------------------|----------------------|------------------------|---------------------------------------------------------------------|----------------------|----------------------|
| Acquisition Time (sec) | 1.0835               | Comment                | MWG086pc mCARBON C6D6 {e:\bruk400data\2011\Dec} ejt 6               | Date                 | 19 Dec 2011 09:18:56 |
| Date Stamp             | 19 Dec 2011 09:18:56 | File Name              | F:\Chemistry\Year 3 data\NMR data\Data\Compound 39\MWG086pc_000001r |                      |                      |
| Frequency (MHz)        | 100.61               | Nucleus                | 13C                                                                 | Number of Transients | 256                  |
| Original Points Count  | 32768                | Owner                  | Administrator                                                       | Points Count         | 32768                |
| Receiver Gain          | 512.00               | SW(cyclical) (Hz)      | 30241.94                                                            | Solvent              | BENZENE-d6           |
| Sweep Width (Hz)       | 30241.01             | Temperature (degree C) | 20.600                                                              | Spectrum Offset (Hz) | 11393.4844           |

Compound39pc.esp

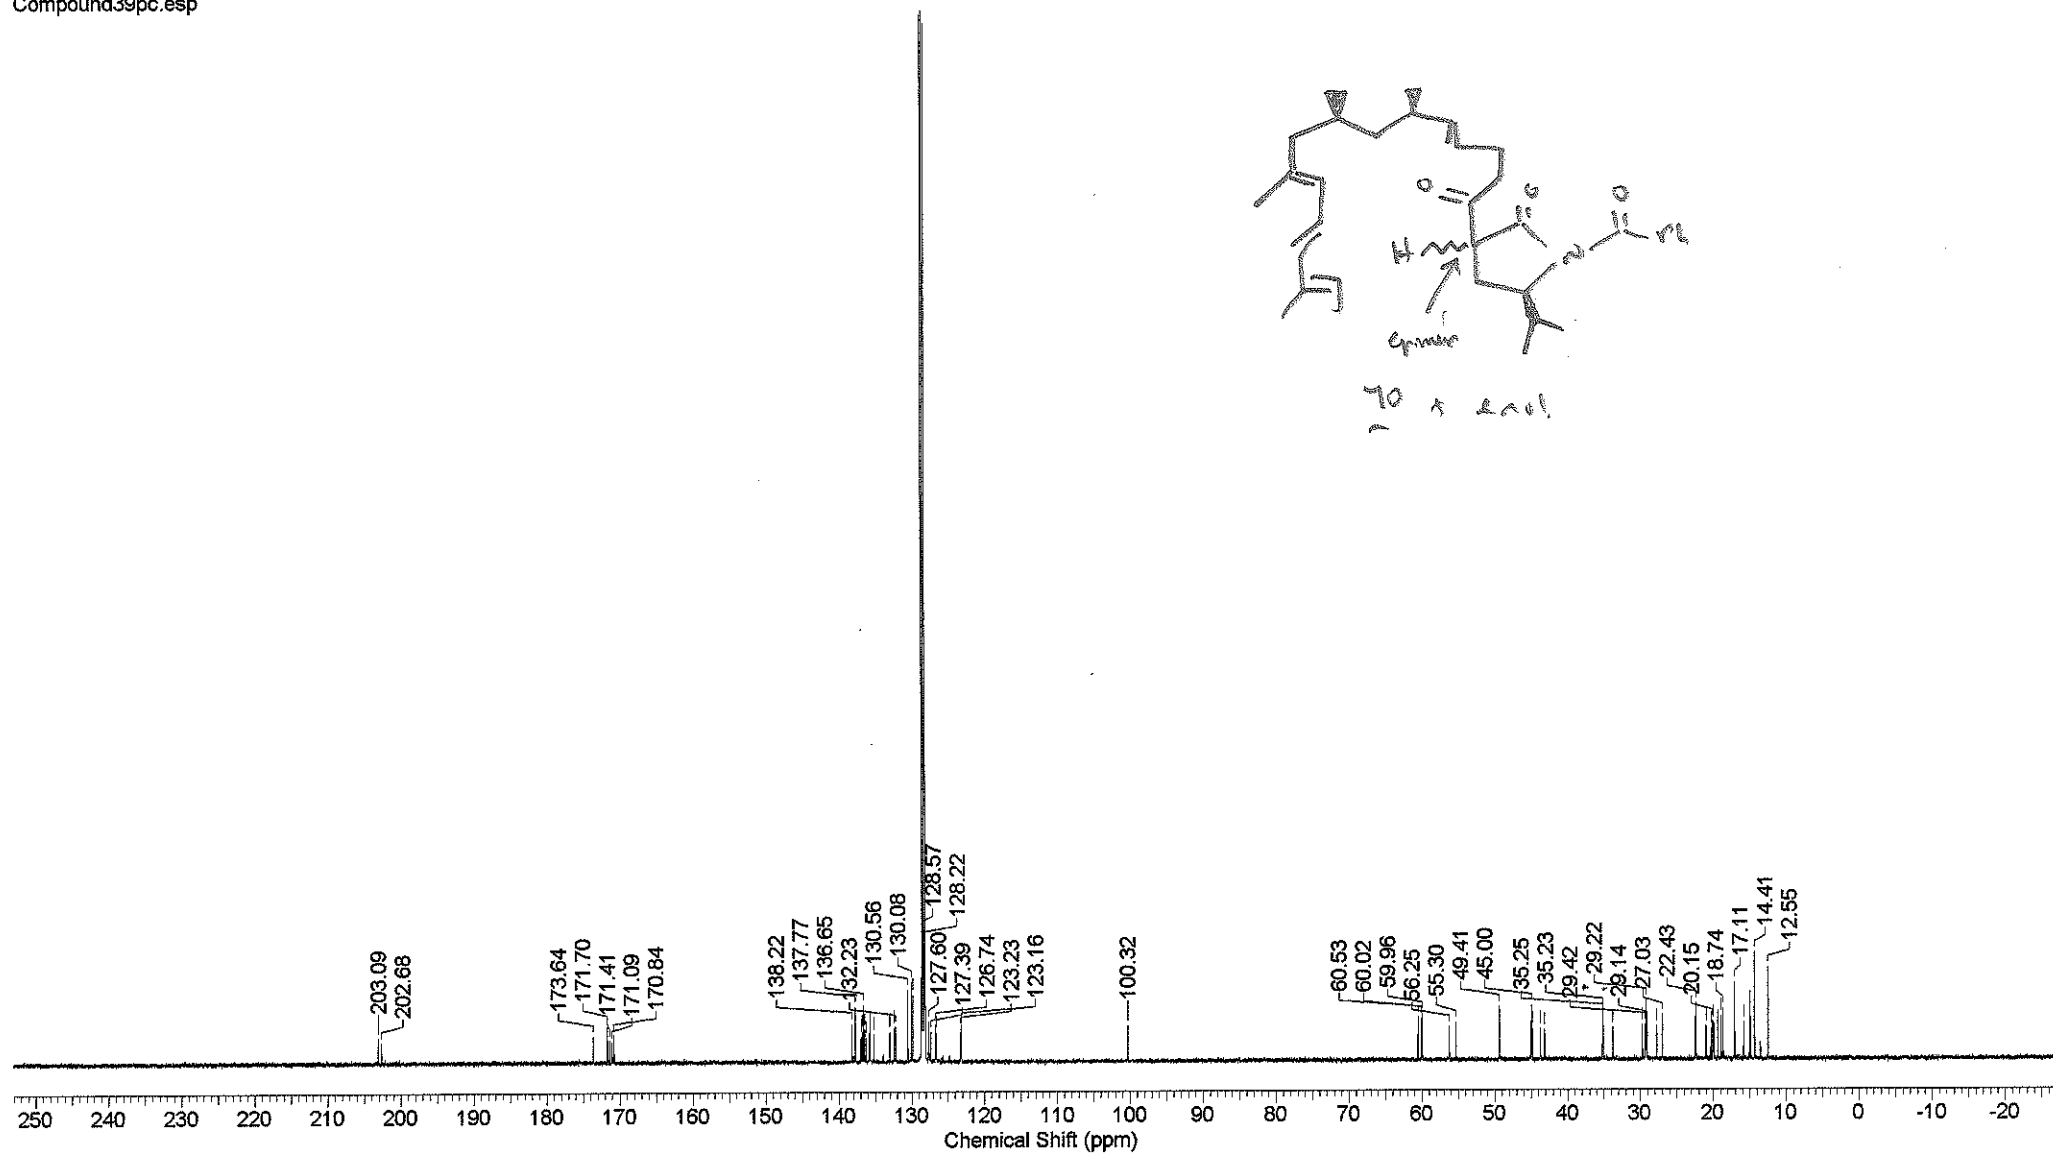

|                               |                                                             |                             |                                                            |                         |         |
|-------------------------------|-------------------------------------------------------------|-----------------------------|------------------------------------------------------------|-------------------------|---------|
| <b>Acquisition Time (sec)</b> | 3.9649                                                      | <b>Comment</b>              | MWH047pp mPROTONnight C6D6 {e:\bruk400data\2012\Apr} ejt 5 |                         |         |
| <b>Date</b>                   | 07 Apr 2012 04:54:24                                        | <b>Date Stamp</b>           | 07 Apr 2012 04:54:24                                       |                         |         |
| <b>File Name</b>              | F:\Chemistry\Year 3 data\NMR data\Data\Compound 40\MWH047pp | 000001r                     | <b>Frequency (MHz)</b>                                     | 400.13                  |         |
| <b>Nucleus</b>                | <sup>1</sup> H                                              | <b>Number of Transients</b> | 16                                                         | <b>Origin</b>           | AV400   |
| <b>Owner</b>                  | Administrator                                               | <b>Points Count</b>         | 32768                                                      | <b>Pulse Sequence</b>   | zg30b   |
| <b>SW(cyclical) (Hz)</b>      | 8264.46                                                     | <b>Solvent</b>              | BENZENE-d6                                                 | <b>Receiver Gain</b>    | 40.30   |
| <b>Temperature (degree C)</b> | 20.900                                                      | <b>Spectrum Offset (Hz)</b> | 2426.2097                                                  | <b>Sweep Width (Hz)</b> | 8264.21 |

Compound40pp.esp

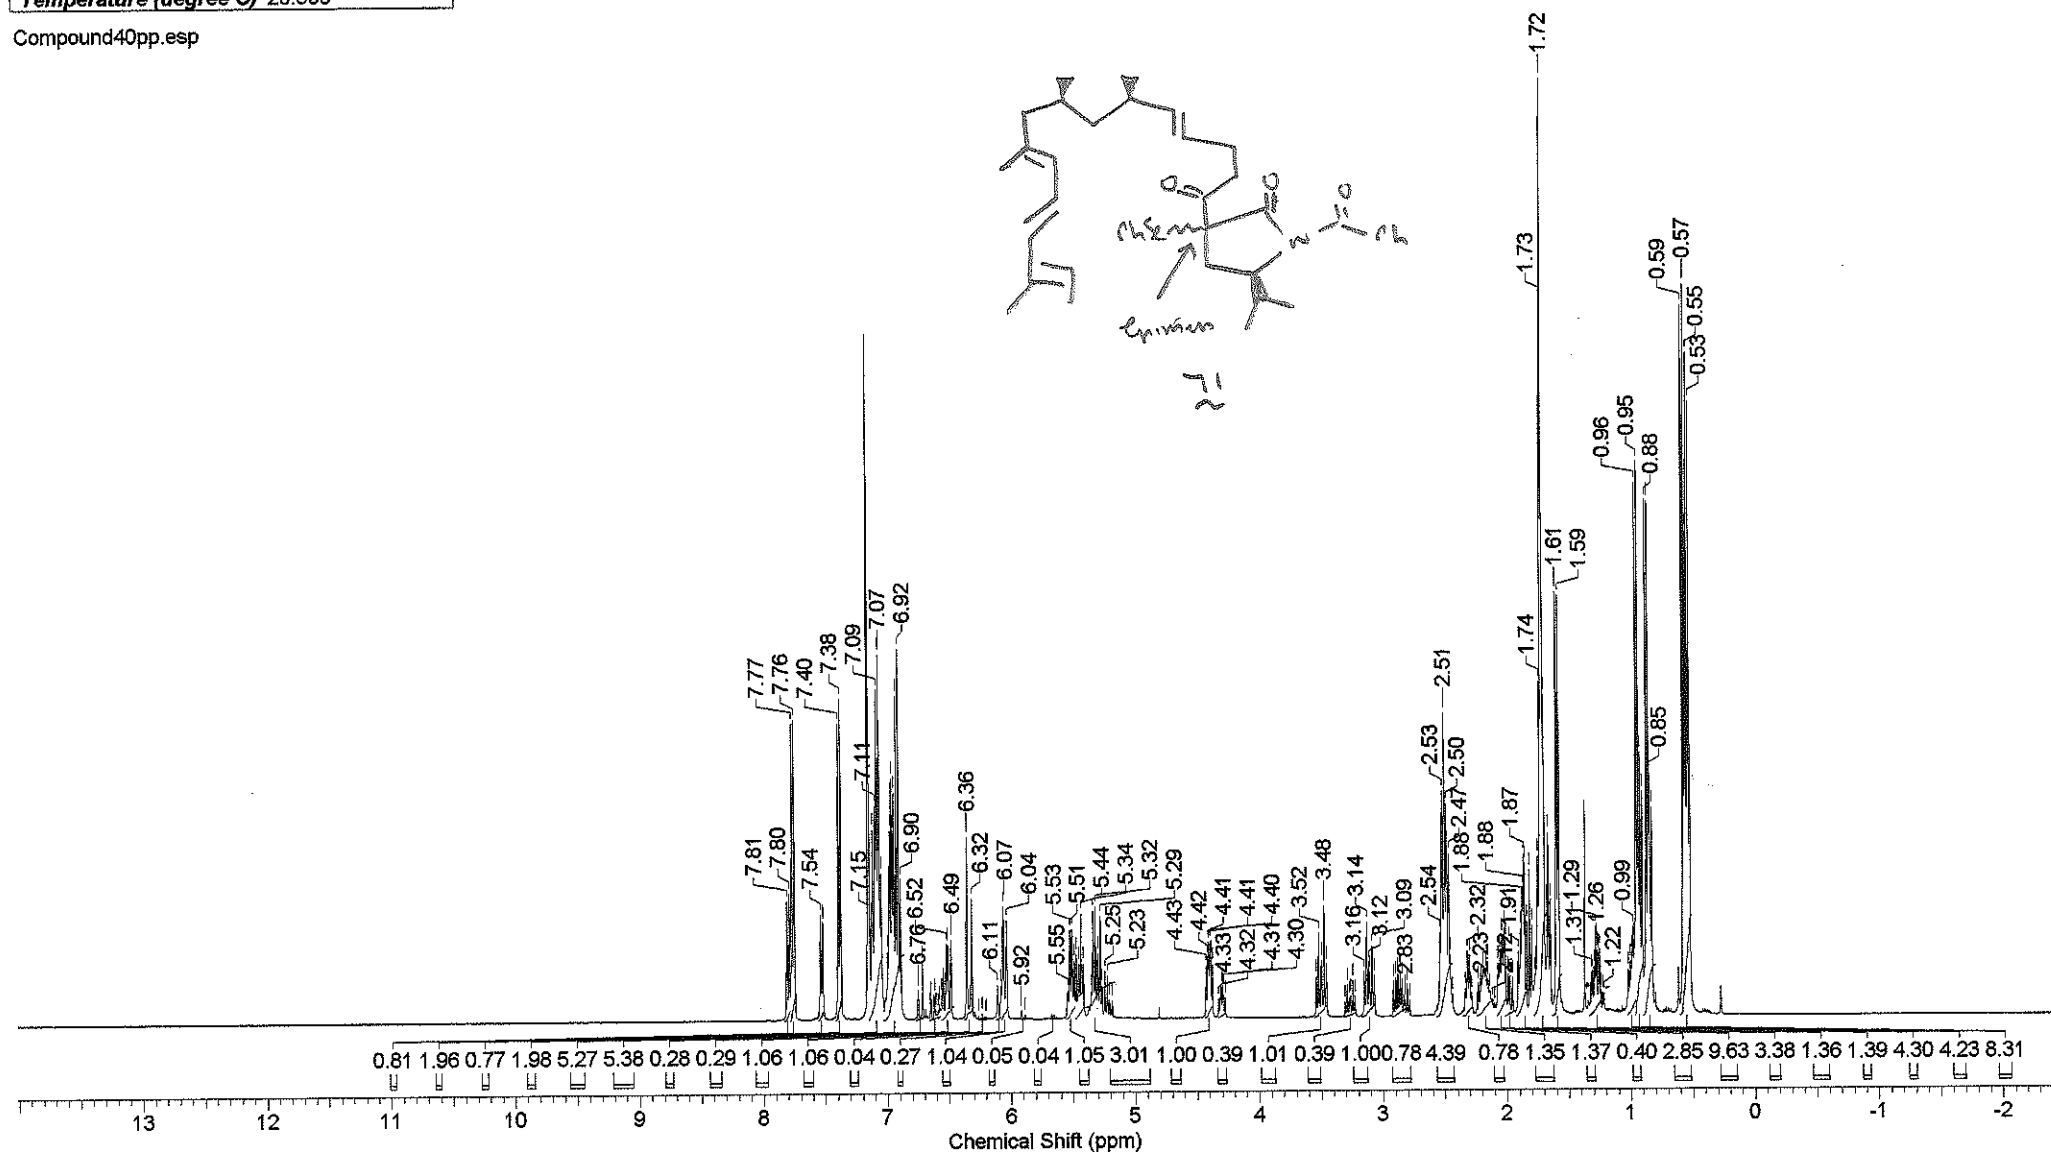

|                        |                      |                        |                                                                     |                      |                      |
|------------------------|----------------------|------------------------|---------------------------------------------------------------------|----------------------|----------------------|
| Acquisition Time (sec) | 1.0835               | Comment                | MWH047pc mCARBONnight C6D6 {e:\bruk400data\2012\Apr} ejt 5          | Date                 | 07 Apr 2012 05:56:16 |
| Date Stamp             | 07 Apr 2012 05:56:16 | File Name              | F:\Chemistry\Year 3 data\NMR data\Data\Compound 40\MWH047pc_000001r |                      |                      |
| Frequency (MHz)        | 100.61               | Nucleus                | 13C                                                                 | Number of Transients | 1024                 |
| Original Points Count  | 32768                | Owner                  | Administrator                                                       | Points Count         | 32768                |
| Receiver Gain          | 512.00               | SW(cyclical) (Hz)      | 30241.94                                                            | Pulse Sequence       | zgpg30               |
| Sweep Width (Hz)       | 30241.01             | Temperature (degree C) | 21.700                                                              | Solvent              | BENZENE-d6           |
|                        |                      |                        |                                                                     | Spectrum Offset (Hz) | 11393.4844           |

Compound40pc.esp

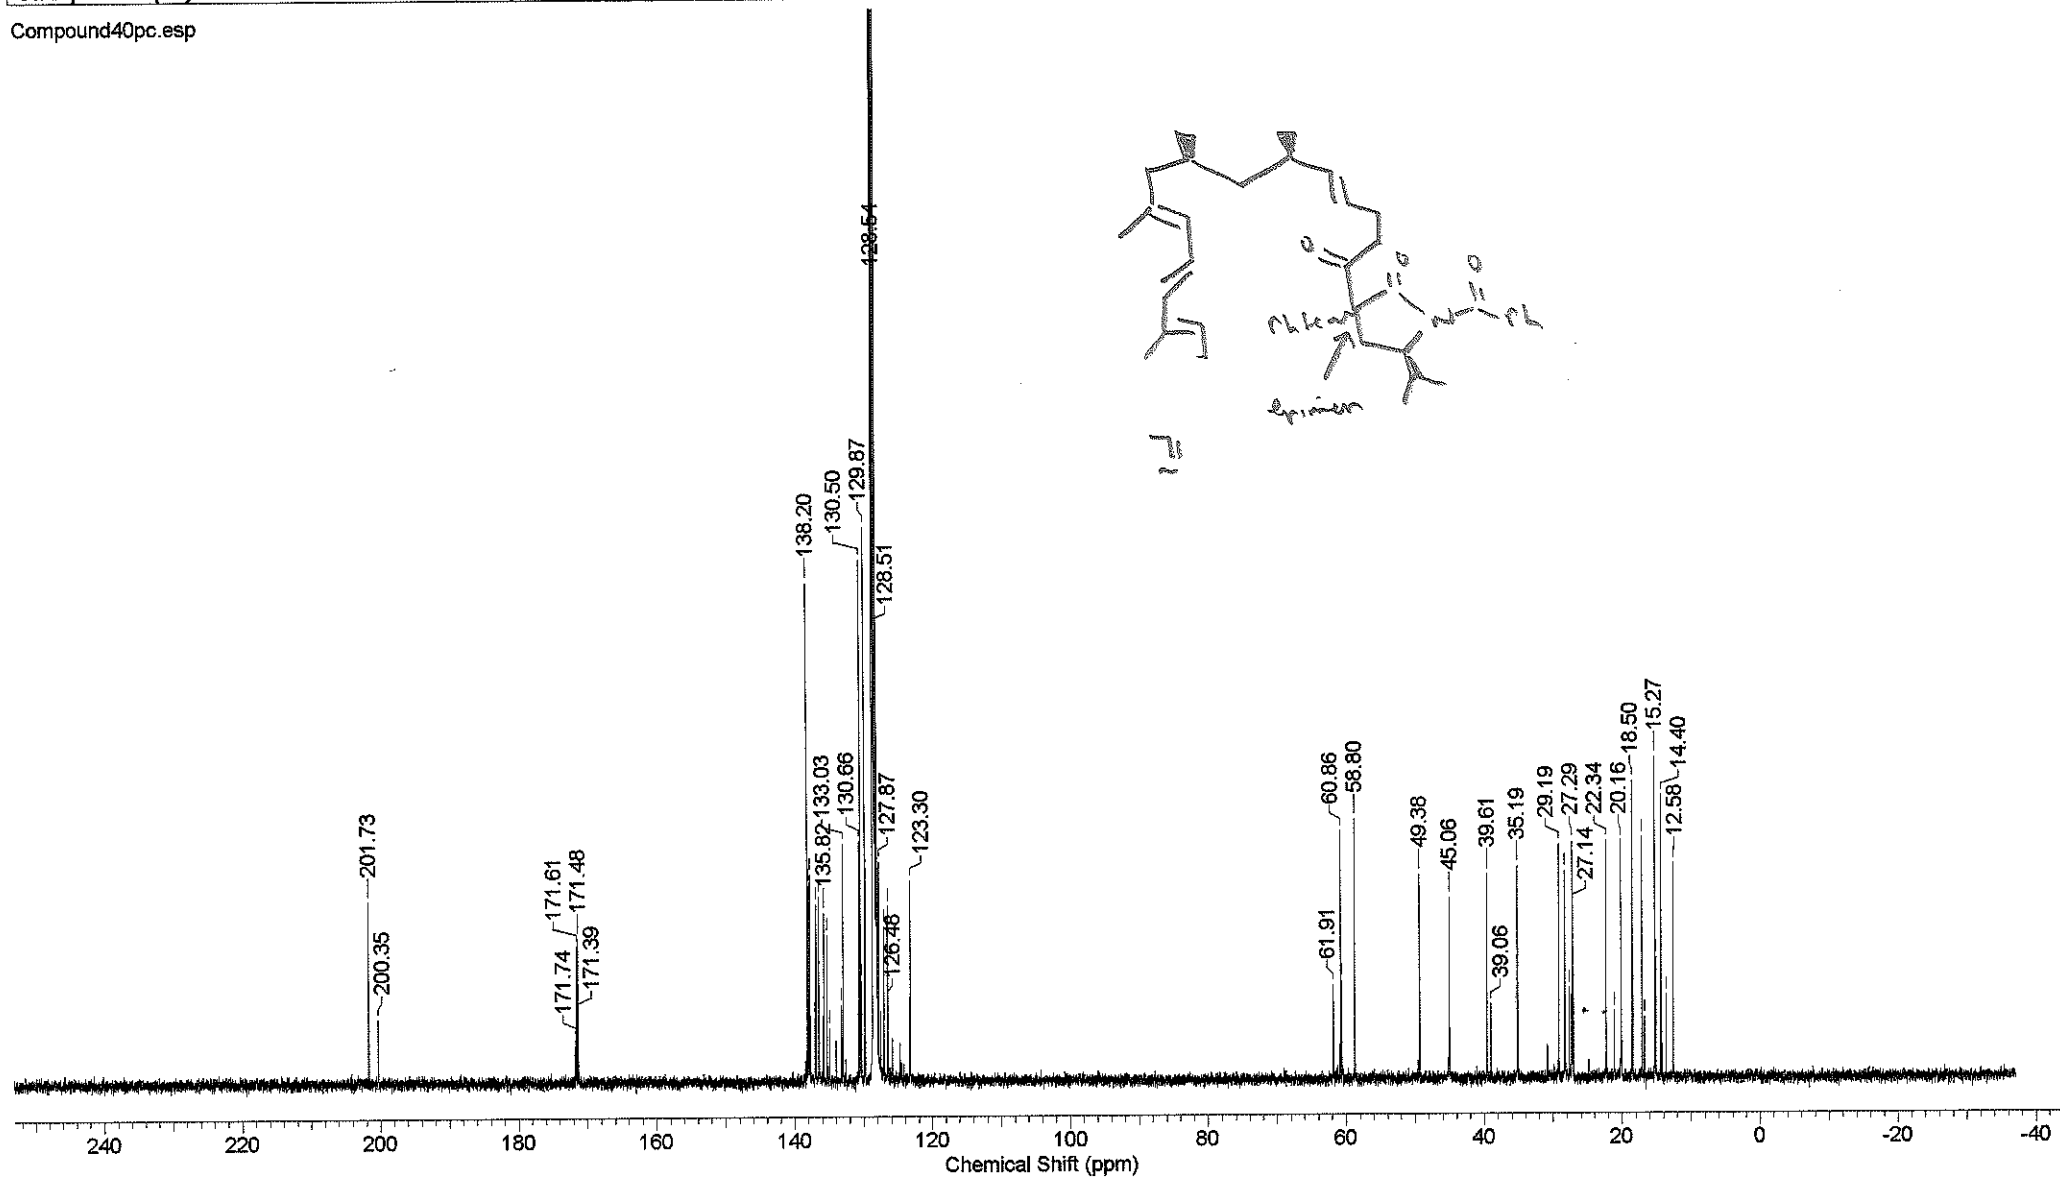

|                               |                                                            |                             |                                                                        |                               |                |
|-------------------------------|------------------------------------------------------------|-----------------------------|------------------------------------------------------------------------|-------------------------------|----------------|
| <b>Acquisition Time (sec)</b> | 3.1719                                                     | <b>Comment</b>              | Mark Willis MWH064PPB mPROTON CDCl3 /opt/bruk500data/2012/Apr vnmr1 56 |                               |                |
| <b>Date</b>                   | 25 Apr 2012 07:45:04                                       | <b>Date Stamp</b>           | 25 Apr 2012 07:45:04                                                   |                               |                |
| <b>File Name</b>              | F:\Chemistry\Year 3 data\NMR data\Data\Compound 52_010001r | <b>Frequency (MHz)</b>      | 500.13                                                                 | <b>Nucleus</b>                | <sup>1</sup> H |
| <b>Number of Transients</b>   | 16                                                         | <b>Origin</b>               | spect                                                                  | <b>Owner</b>                  | vnmr1          |
| <b>Points Count</b>           | 32768                                                      | <b>Pulse Sequence</b>       | zg30b                                                                  | <b>Receiver Gain</b>          | 228.00         |
| <b>Solvent</b>                | CHLOROFORM-d                                               | <b>Spectrum Offset (Hz)</b> | 3079.9771                                                              | <b>SW(cyclical) (Hz)</b>      | 10330.58       |
|                               |                                                            | <b>Sweep Width (Hz)</b>     | 10330.26                                                               | <b>Temperature (degree C)</b> | 25.128         |

Compound52pp.esp

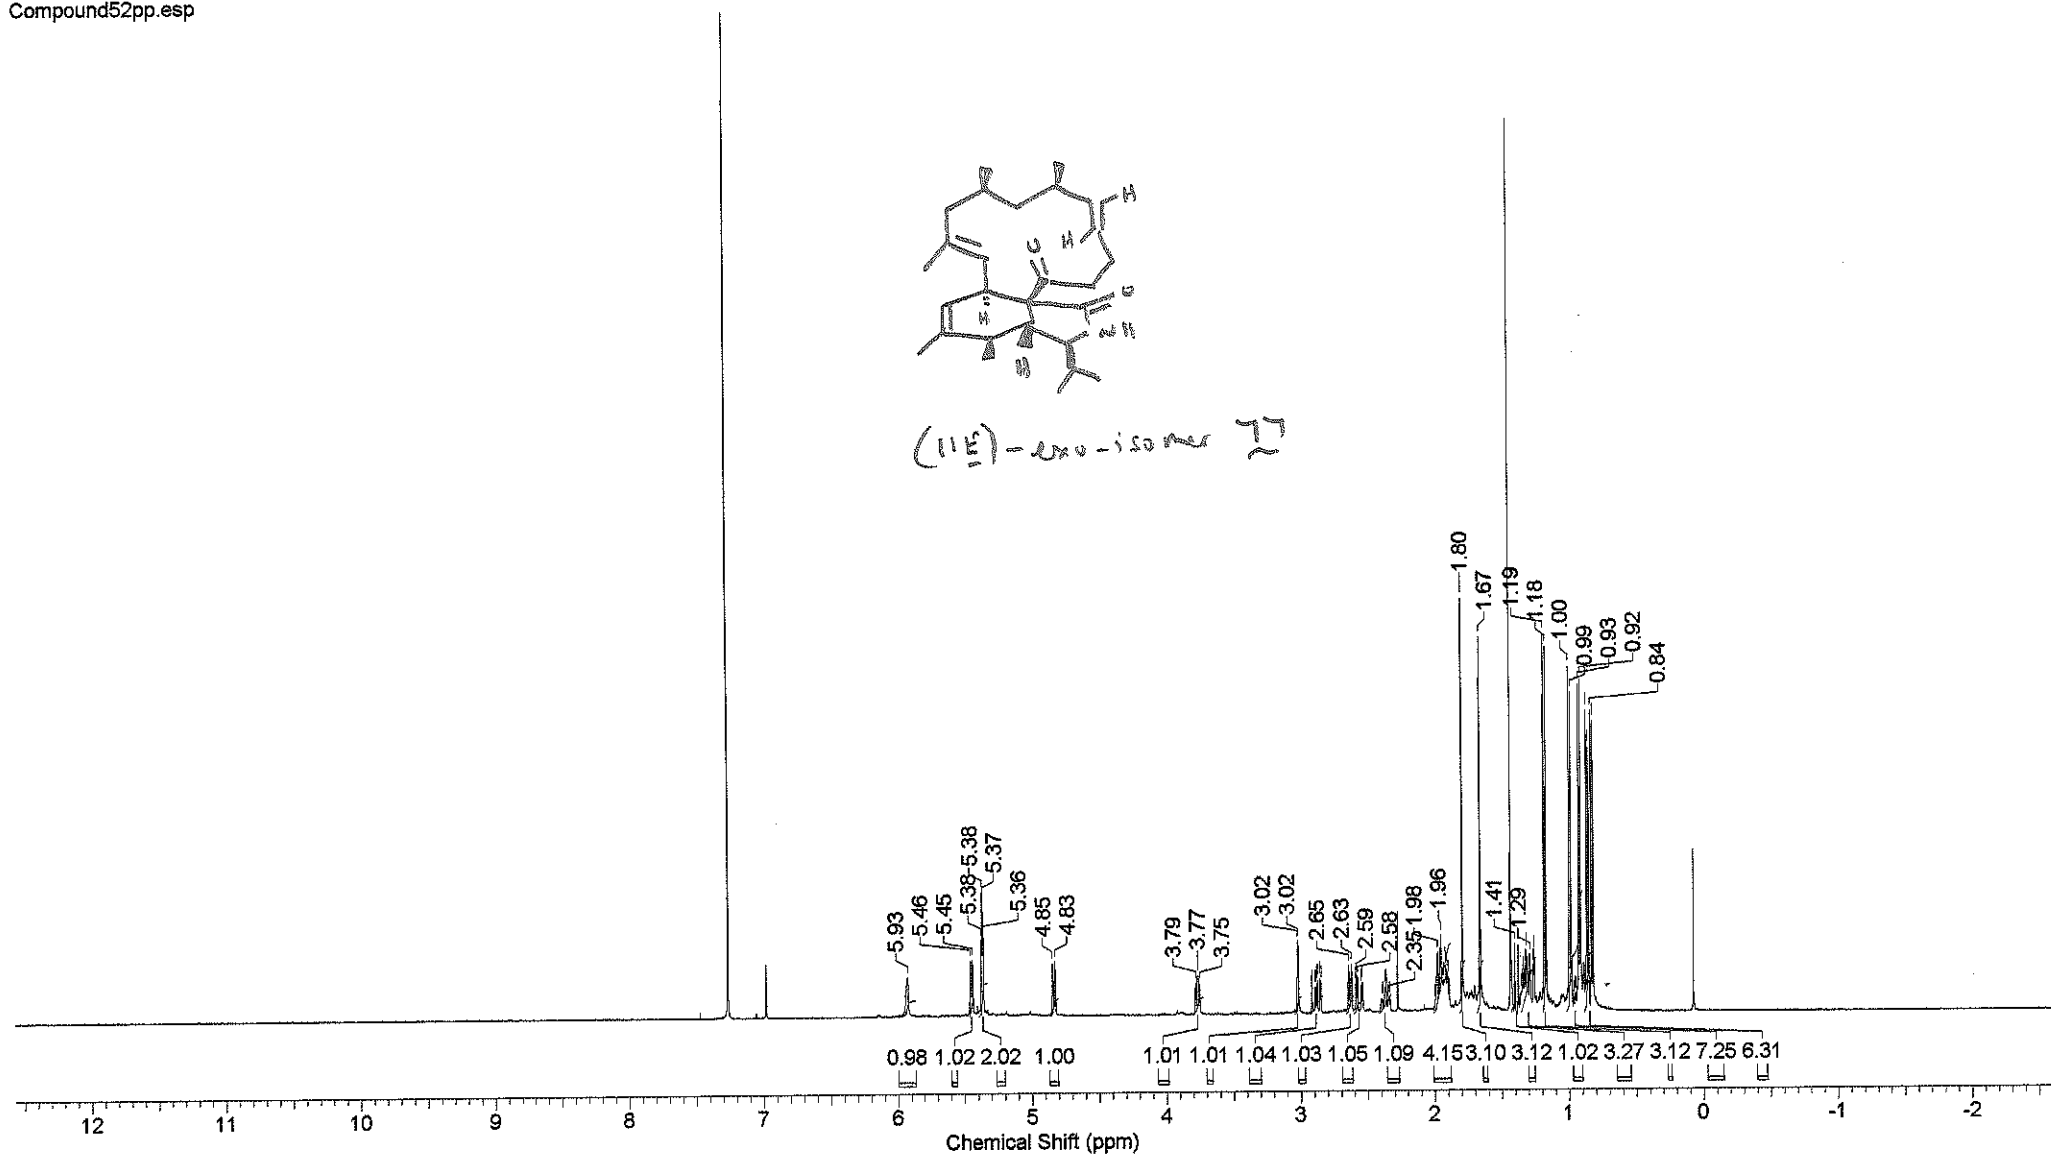



|                               |                                                                      |                                                                                       |              |                             |                      |
|-------------------------------|----------------------------------------------------------------------|---------------------------------------------------------------------------------------|--------------|-----------------------------|----------------------|
| <b>Acquisition Time (sec)</b> | 1.1010                                                               | <b>Comment</b> Mark Willis MWH064PPB mCARBON CDCl3 /opt/bruk500data/2012/Apr vnmr1 56 |              |                             |                      |
| <b>Date</b>                   | 26 Apr 2012 04:28:48                                                 |                                                                                       |              | <b>Date Stamp</b>           | 26 Apr 2012 04:28:48 |
| <b>File Name</b>              | F:\Chemistry\Year 3 data\NMR data\Data\Compound 52\MWH064pcb_000001r |                                                                                       |              | <b>Frequency (MHz)</b>      | 125.76               |
| <b>Nucleus</b>                | <sup>13</sup> C                                                      | <b>Number of Transients</b>                                                           | 18432        | <b>Origin</b>               | spect                |
| <b>Owner</b>                  | vnmr1                                                                | <b>Points Count</b>                                                                   | 32768        | <b>Pulse Sequence</b>       | zgpg30               |
| <b>SW(cyclical) (Hz)</b>      | 29761.90                                                             | <b>Solvent</b>                                                                        | CHLOROFORM-d | <b>Spectrum Offset (Hz)</b> | 12573.9014           |
| <b>Temperature (degree C)</b> | 24.931                                                               |                                                                                       |              | <b>Receiver Gain</b>        | 512.00               |
|                               |                                                                      |                                                                                       |              | <b>Sweep Width (Hz)</b>     | 29761.00             |

Compound52pc.esp

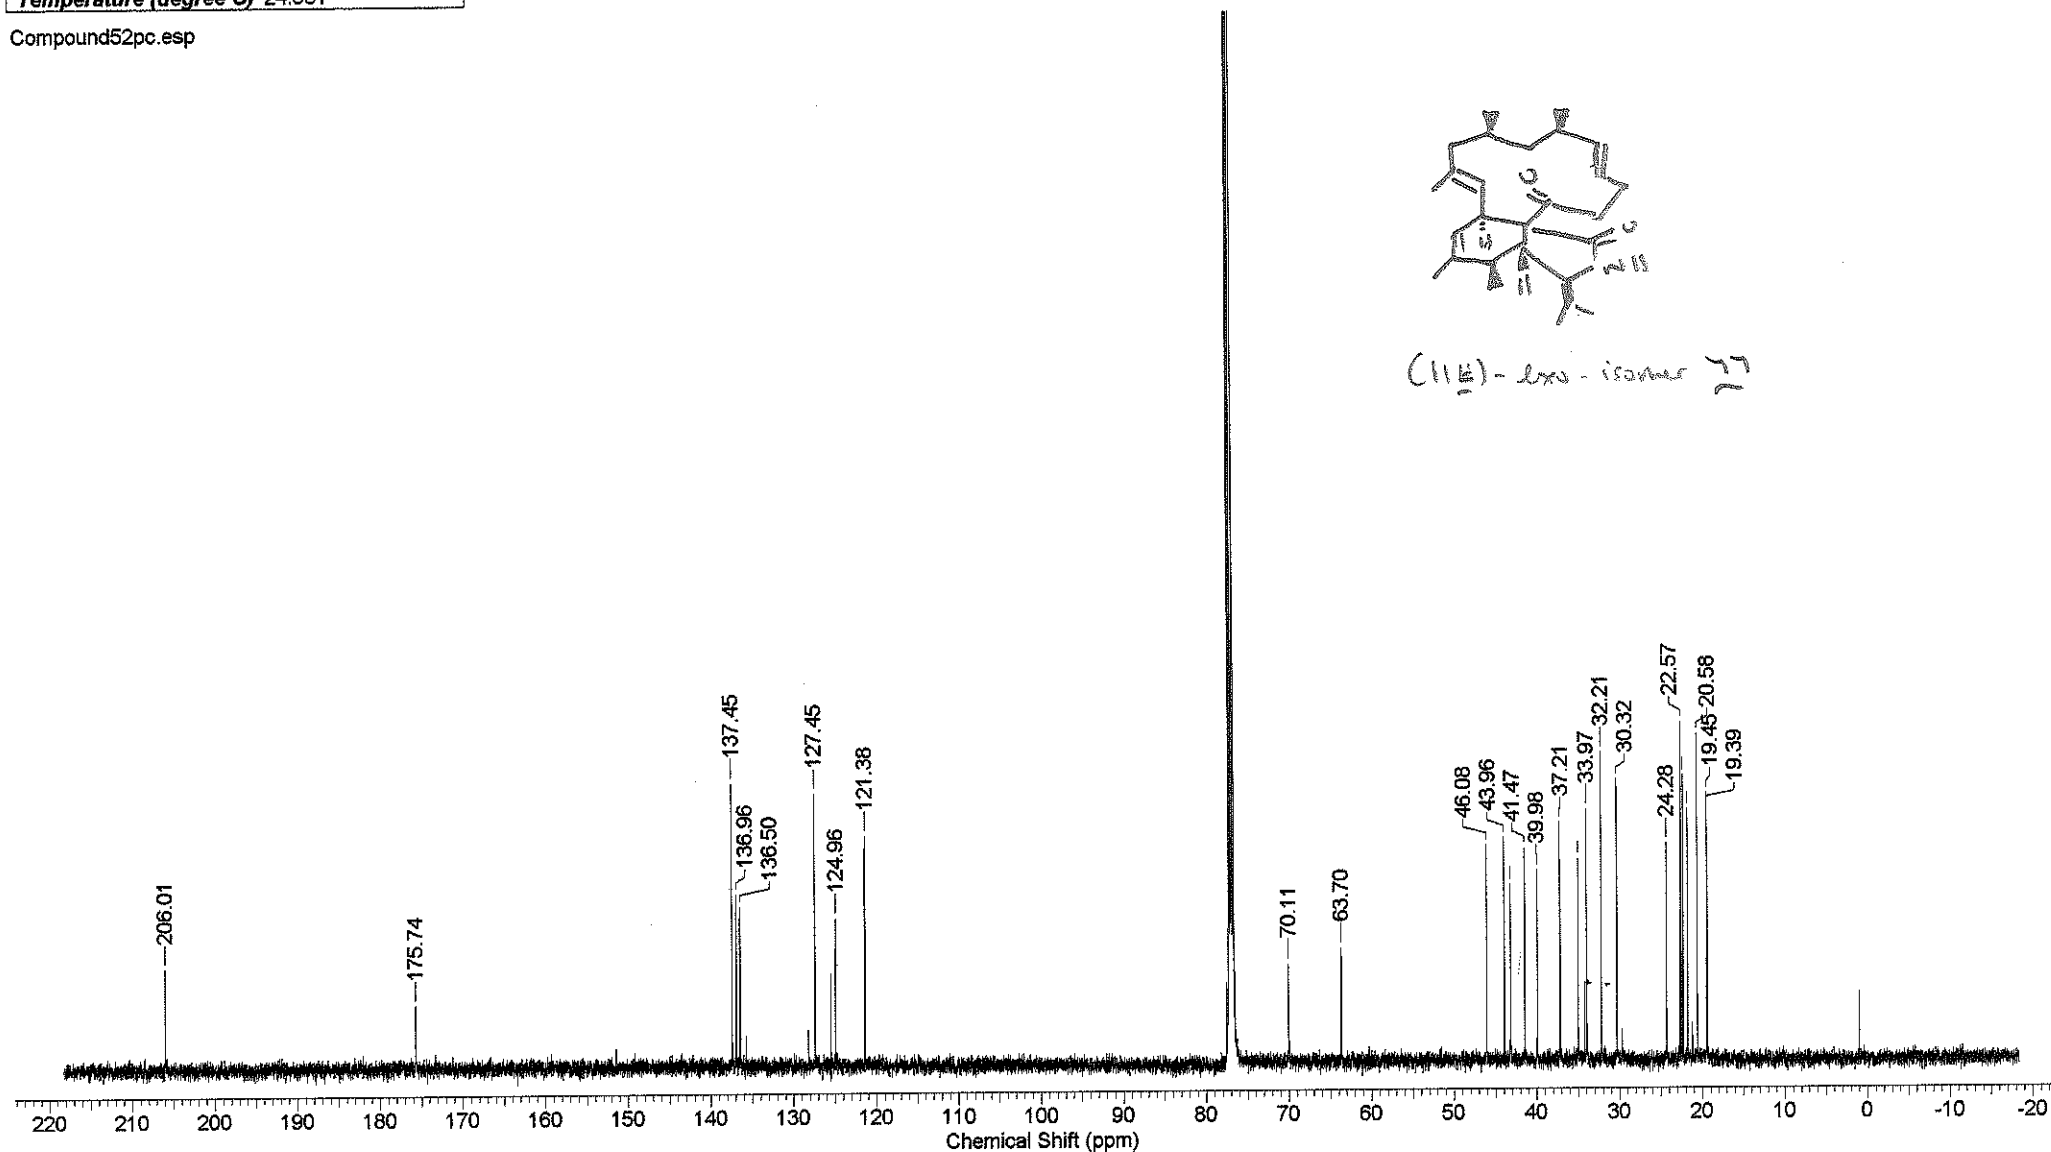

|                               |                                                            |                             |                                                                        |                              |          |                                      |
|-------------------------------|------------------------------------------------------------|-----------------------------|------------------------------------------------------------------------|------------------------------|----------|--------------------------------------|
| <b>Acquisition Time (sec)</b> | 3.1719                                                     | <b>Comment</b>              | Mark willis MWH066ppb mPROTON CDC13 /opt/bruk500data/2012/Apr vnmr1 18 |                              |          |                                      |
| <b>Date</b>                   | 27 Apr 2012 08:55:28                                       | <b>Date Stamp</b>           | 27 Apr 2012 08:55:28                                                   |                              |          |                                      |
| <b>File Name</b>              | F:\Chemistry\Year 3 data\NMR data\Data\Compound 54_010001r | <b>Frequency (MHz)</b>      | 500.13                                                                 | <b>Nucleus</b>               | 1H       |                                      |
| <b>Number of Transients</b>   | 16                                                         | <b>Origin</b>               | spect                                                                  | <b>Original Points Count</b> | 32768    | <b>Owner</b> vnmr1                   |
| <b>Points Count</b>           | 32768                                                      | <b>Pulse Sequence</b>       | zg30b                                                                  | <b>Receiver Gain</b>         | 228.00   | <b>SW(cyclical) (Hz)</b> 10330.58    |
| <b>Solvent</b>                | CHLOROFORM-d                                               | <b>Spectrum Offset (Hz)</b> | 3079.9768                                                              | <b>Sweep Width (Hz)</b>      | 10330.26 | <b>Temperature (degree C)</b> 25.029 |

Compound54pp.esp

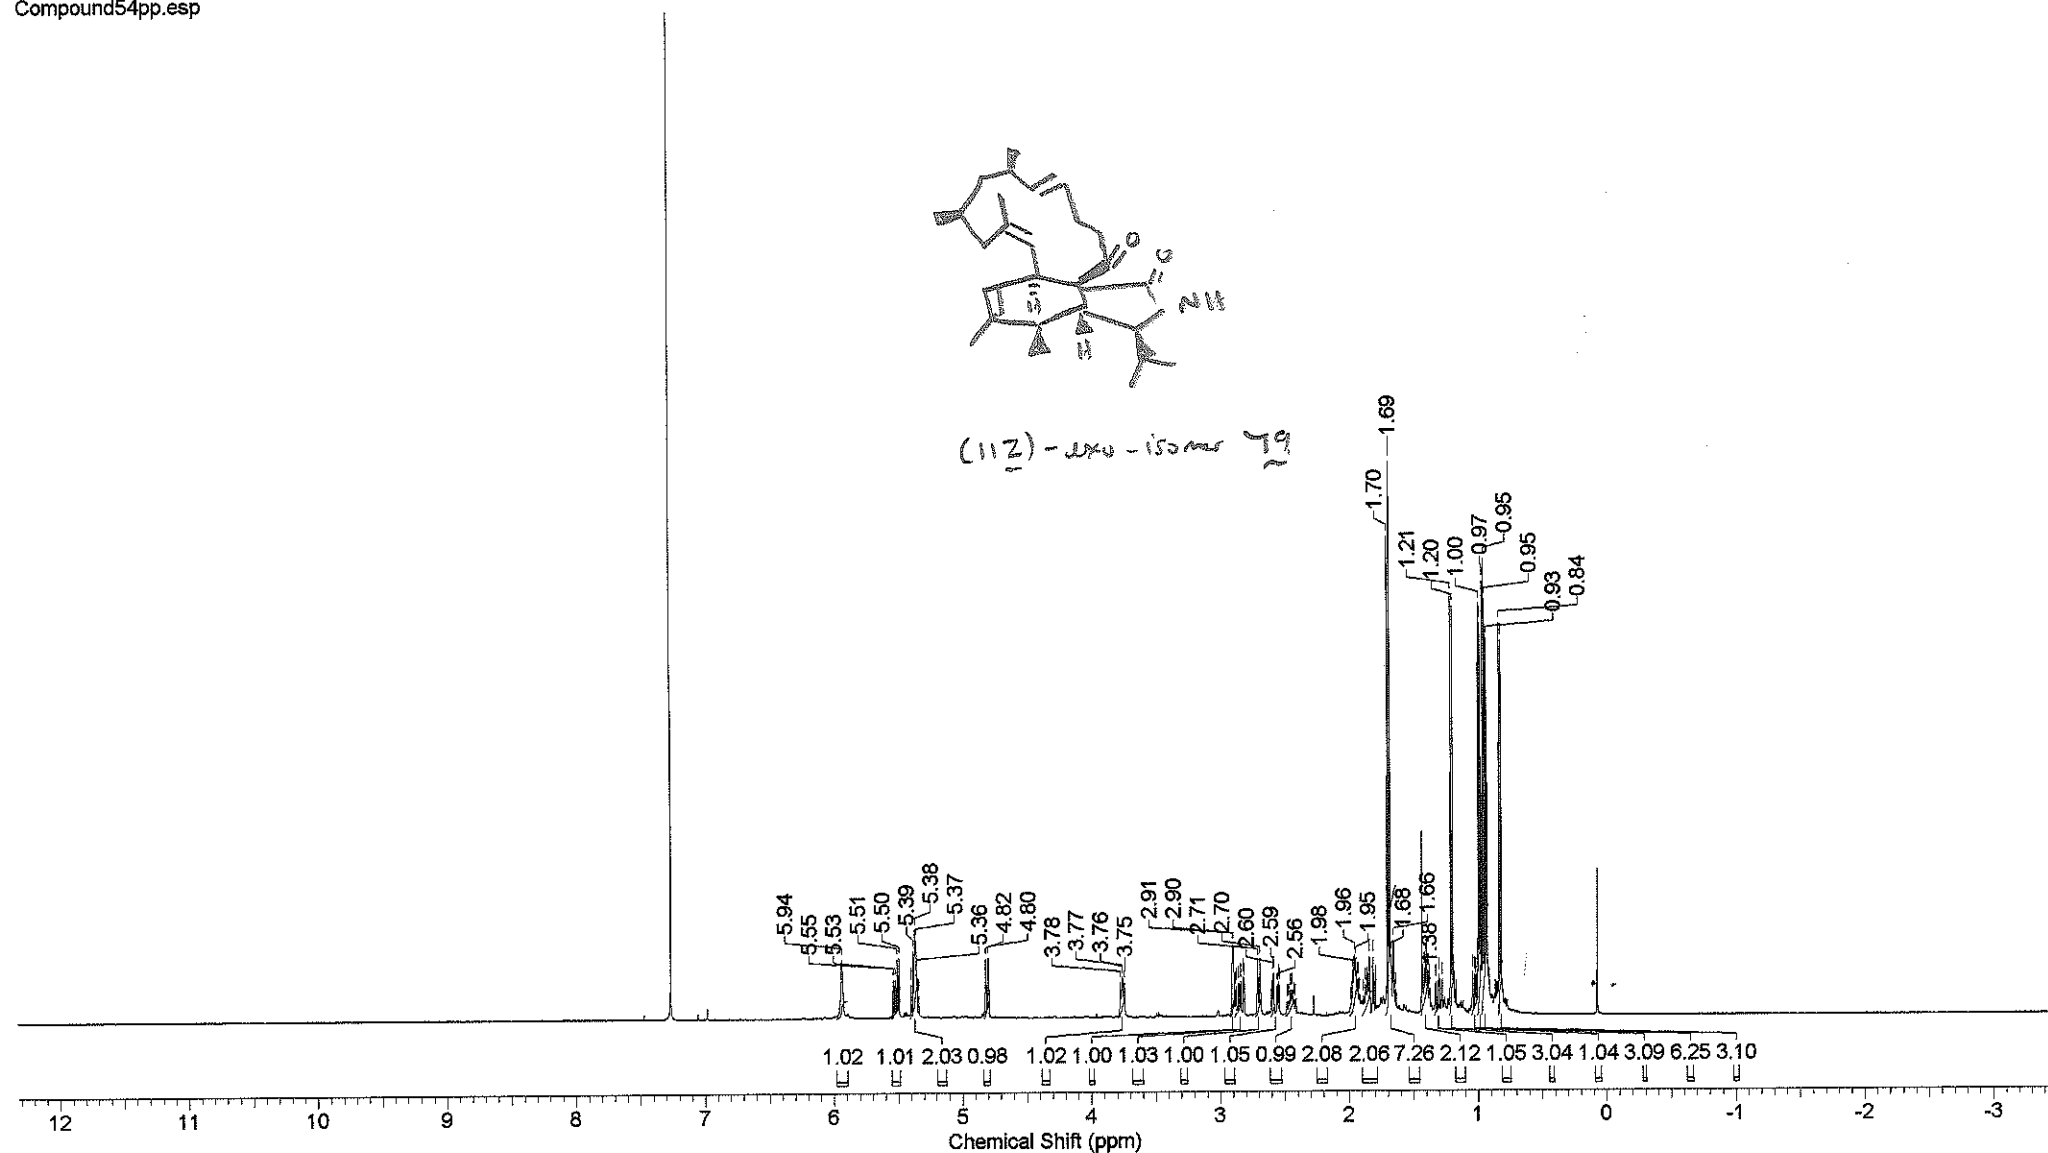

|                               |                                                                      |                             |                                                                        |                             |            |
|-------------------------------|----------------------------------------------------------------------|-----------------------------|------------------------------------------------------------------------|-----------------------------|------------|
| <b>Acquisition Time (sec)</b> | 1.1010                                                               | <b>Comment</b>              | Mark willis MWH066ppb mCARBON CDCl3 /opt/bruk500data/2012/Apr vnmr1 18 |                             |            |
| <b>Date</b>                   | 27 Apr 2012 10:18:40                                                 | <b>Date Stamp</b>           | 27 Apr 2012 10:18:40                                                   |                             |            |
| <b>File Name</b>              | F:\Chemistry\Year 3 data\NMR data\Data\Compound 54\MWH066pcb_000001r | <b>Frequency (MHz)</b>      | 125.76                                                                 |                             |            |
| <b>Nucleus</b>                | <sup>13</sup> C                                                      | <b>Number of Transients</b> | 18432                                                                  | <b>Origin</b>               | spect      |
| <b>Owner</b>                  | vnmr1                                                                | <b>Points Count</b>         | 32768                                                                  | <b>Pulse Sequence</b>       | zgpg30     |
| <b>SW(cyclical) (Hz)</b>      | 29761.90                                                             | <b>Solvent</b>              | CHLOROFORM-d                                                           | <b>Spectrum Offset (Hz)</b> | 12572.9922 |
| <b>Temperature (degree C)</b> | 25.029                                                               |                             |                                                                        | <b>Receiver Gain</b>        | 512.00     |
|                               |                                                                      |                             |                                                                        | <b>Sweep Width (Hz)</b>     | 29761.00   |

Compound54pc.esp

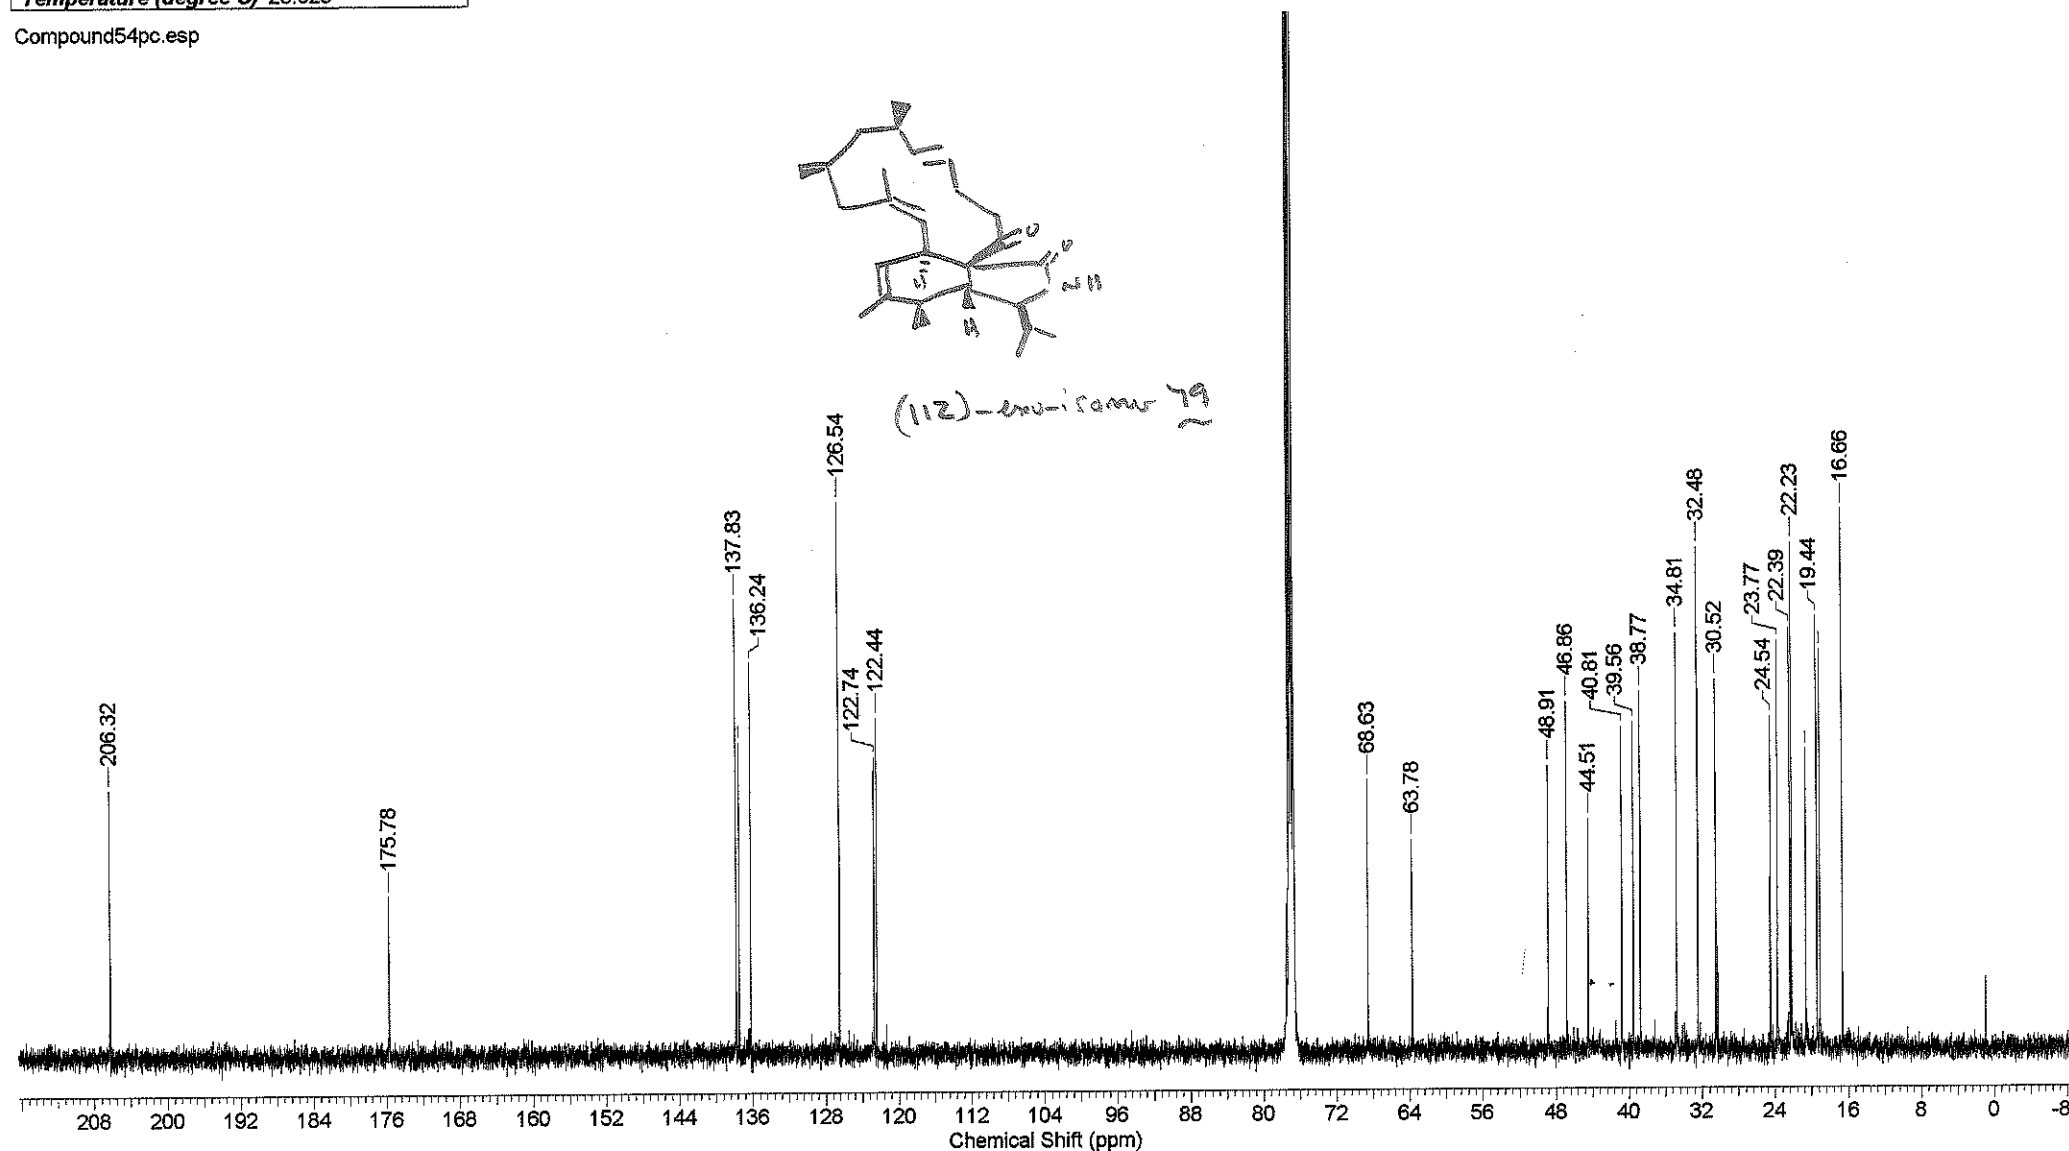

(112)-enantiomer 79

|                               |                                                                      |                             |                                                                        |                              |           |
|-------------------------------|----------------------------------------------------------------------|-----------------------------|------------------------------------------------------------------------|------------------------------|-----------|
| <b>Acquisition Time (sec)</b> | 3.1719                                                               | <b>Comment</b>              | Mark willis MWH066ppt mPROTON CDCl3 /opt/bruk500data/2012/Apr vnmr1 19 |                              |           |
| <b>Date</b>                   | 28 Apr 2012 06:06:56                                                 | <b>Date Stamp</b>           | 28 Apr 2012 06:06:56                                                   |                              |           |
| <b>File Name</b>              | F:\Chemistry\Year 3 data\NMR data\Data\Compound 53\MWH066ppt 000001r | <b>Frequency (MHz)</b>      | 500.13                                                                 |                              |           |
| <b>Nucleus</b>                | <sup>1</sup> H                                                       | <b>Number of Transients</b> | 16                                                                     | <b>Origin</b>                | spect     |
| <b>Owner</b>                  | vnmr1                                                                | <b>Points Count</b>         | 32768                                                                  | <b>Original Points Count</b> | 32768     |
| <b>SW(cyclical) (Hz)</b>      | 10330.58                                                             | <b>Pulse Sequence</b>       | zg30b                                                                  | <b>Receiver Gain</b>         | 256.00    |
| <b>Temperature (degree C)</b> | 25.029                                                               | <b>Solvent</b>              | CHLOROFORM-d                                                           | <b>Spectrum Offset (Hz)</b>  | 3079.9768 |
|                               |                                                                      |                             |                                                                        | <b>Sweep Width (Hz)</b>      | 10330.26  |

Compound53pp.esp

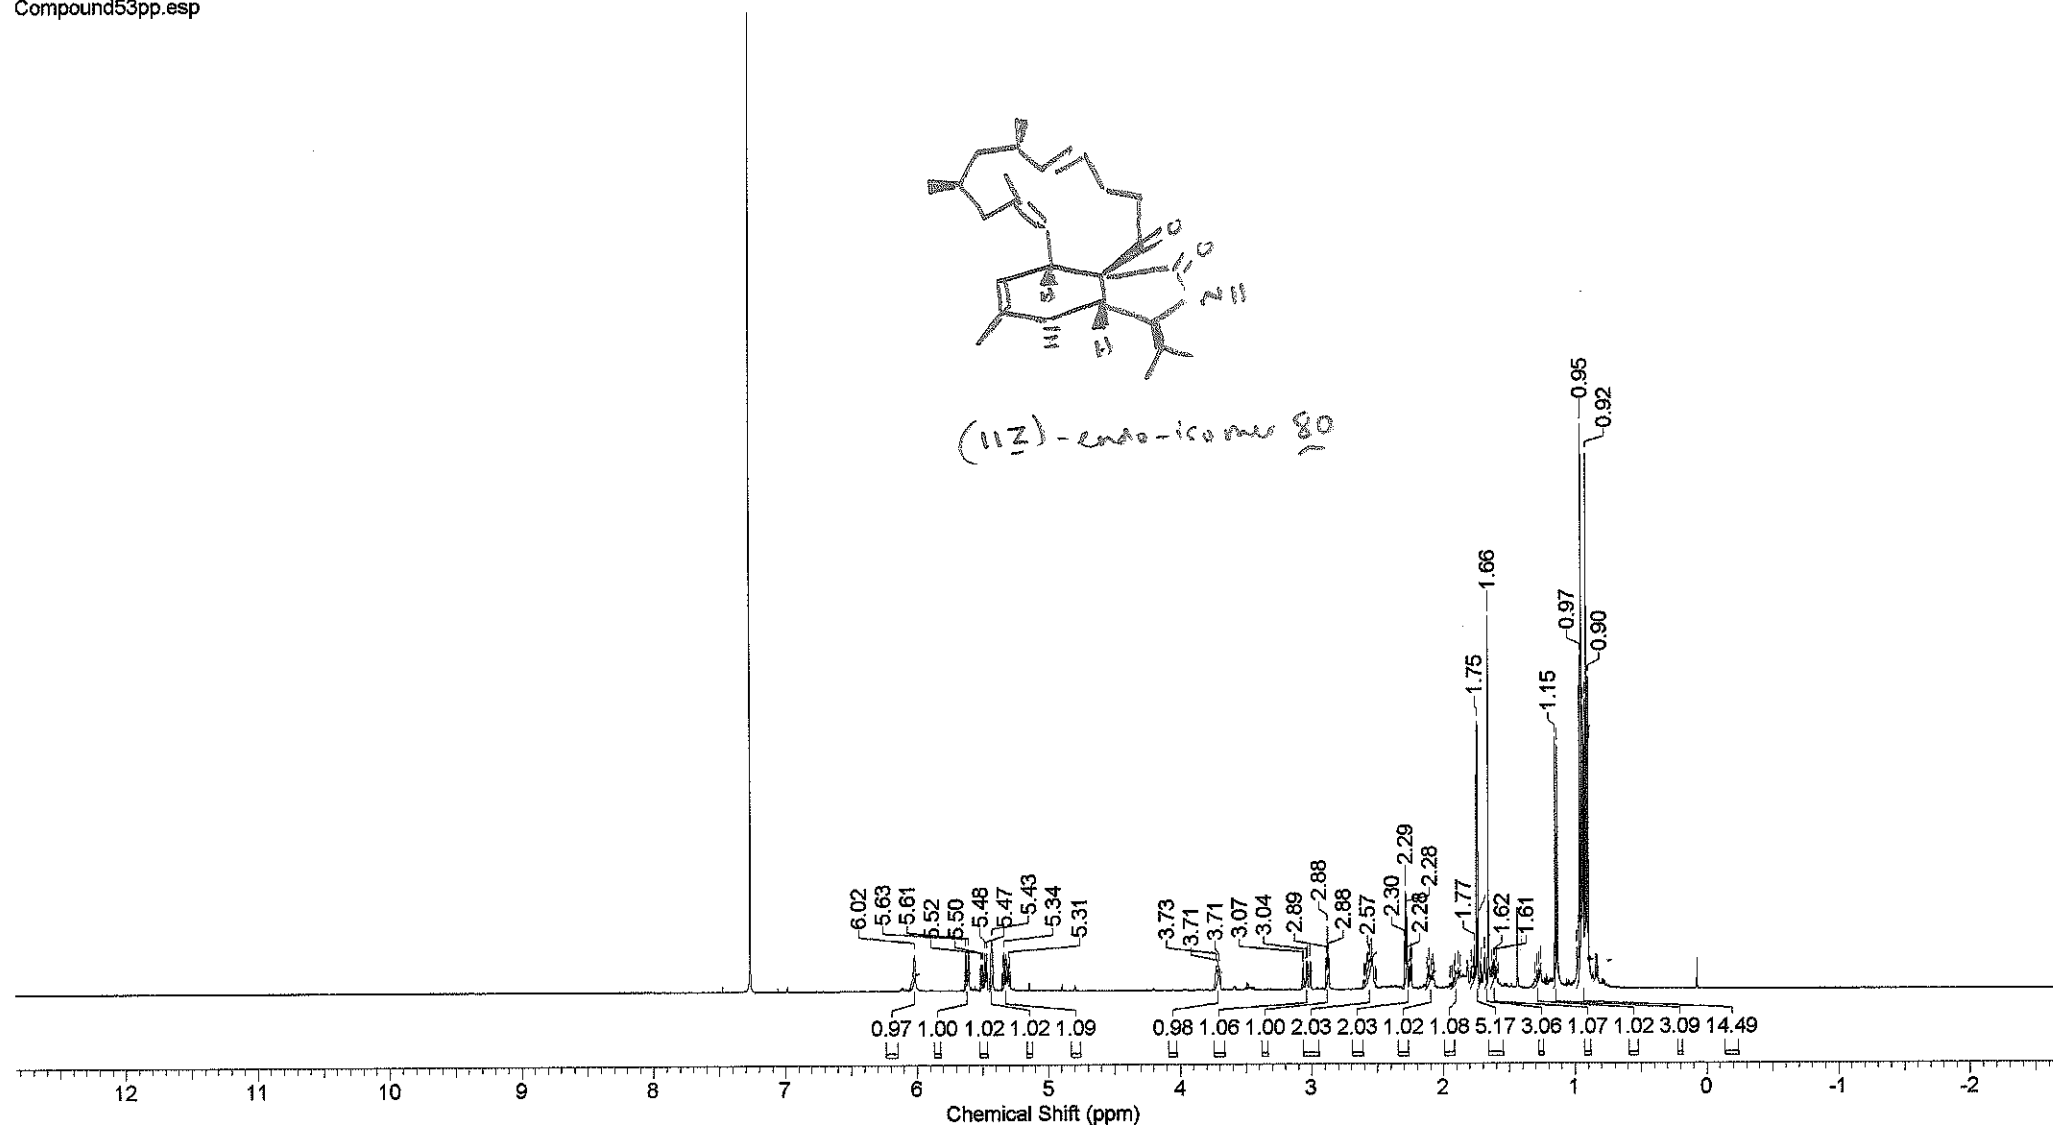

|                               |                                                                      |                             |                                                                        |                             |            |
|-------------------------------|----------------------------------------------------------------------|-----------------------------|------------------------------------------------------------------------|-----------------------------|------------|
| <b>Acquisition Time (sec)</b> | 1.1010                                                               | <b>Comment</b>              | Mark willis MWH066ppt mCARBON CDCl3 /opt/bruk500data/2012/Apr vnmr1 19 |                             |            |
| <b>Date</b>                   | 28 Apr 2012 22:51:44                                                 | <b>Date Stamp</b>           | 28 Apr 2012 22:51:44                                                   |                             |            |
| <b>File Name</b>              | F:\Chemistry\Year 3 data\NMR data\Data\Compound 53\MWH066ppt 000001r | <b>Frequency (MHz)</b>      | 125.76                                                                 |                             |            |
| <b>Nucleus</b>                | 13C                                                                  | <b>Number of Transients</b> | 18432                                                                  | <b>Origin</b>               | spect      |
| <b>Owner</b>                  | vnmr1                                                                | <b>Points Count</b>         | 32768                                                                  | <b>Pulse Sequence</b>       | zgpg30     |
| <b>SW(cyclical) (Hz)</b>      | 29761.90                                                             | <b>Solvent</b>              | CHLOROFORM-d                                                           | <b>Spectrum Offset (Hz)</b> | 12572.9824 |
| <b>Temperature (degree C)</b> | 24.931                                                               | <b>Sweep Width (Hz)</b>     | 29761.00                                                               |                             |            |

Compound53pc.esp

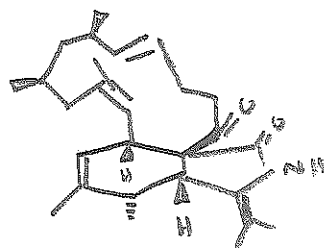

(11Z)-endo-isomer 80

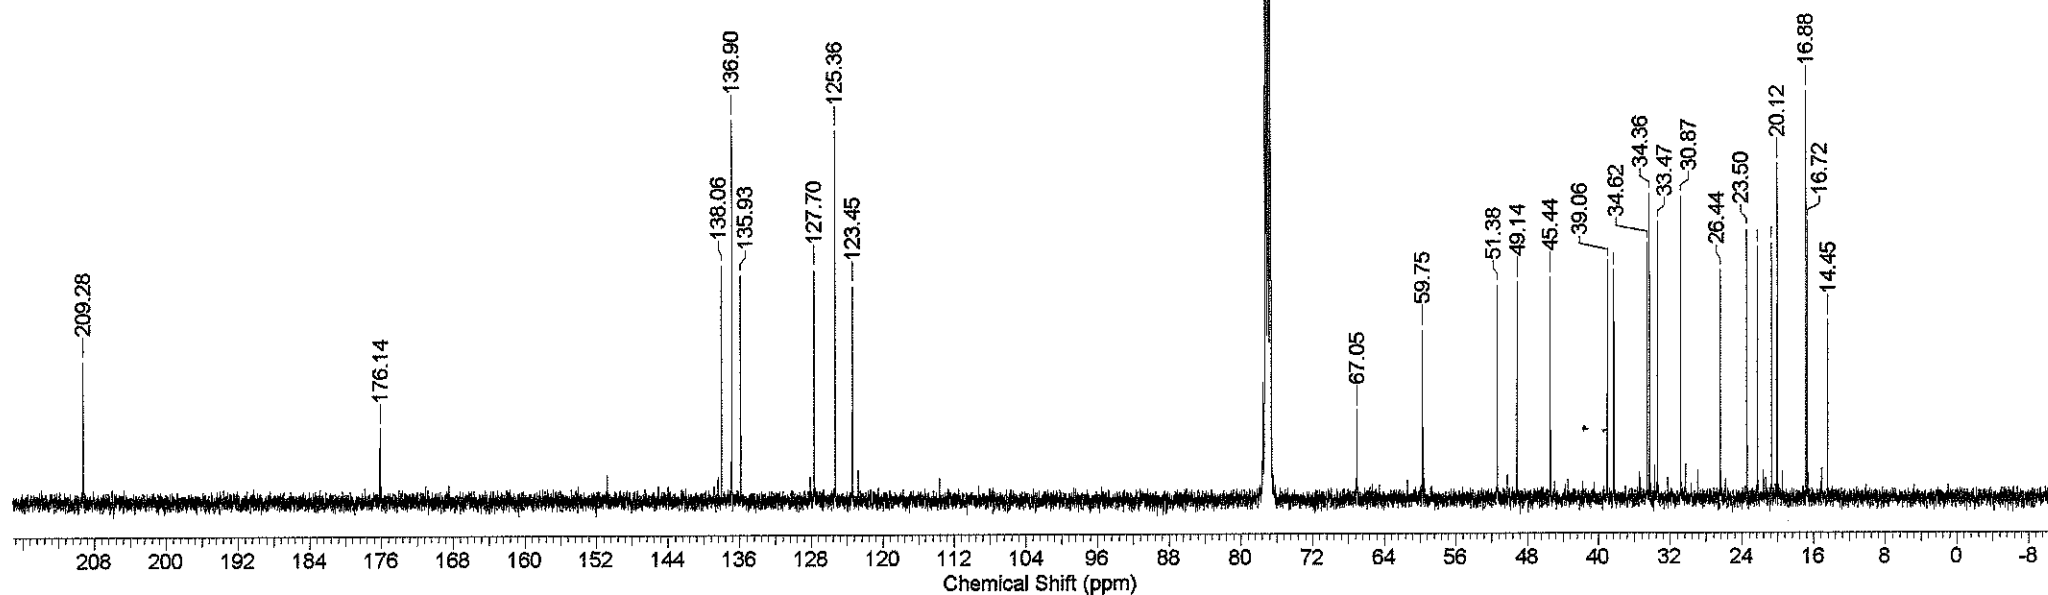

Supplement: c4ob01308e1.pdf [file c4ob01308e1.pdf]
